# Supplementary material for: Label-Free Liquid Chromatography–Mass Spectrometry Proteomic Analysis of Urinary Identification in Diabetic Vascular Dementia in a Han Chinese Population
Source: Front Aging Neurosci. 2021 Feb 1;13:619945. doi: 10.3389/fnagi.2021.619945 (PMC7882624; doi:10.3389/fnagi.2021.619945)
Supplement: Supplementary file 1 [file Table_1.XLSX]

## Sheet: Details of all DEPs
TABLE S1 Details of all significant DEPs identified in VD_T2DM vs NC
Accession	Description	FC(VD_T2DM/NC)	Log2FC(VD_T2DM/NC)	P_value(VD_T2DM/NC)	Regulate	Significant	VD_T2DM	NC	NC1	NC10	NC11	NC12	NC13	NC14	NC15	NC16	NC17	NC18	NC19	NC2	NC20	NC21	NC3	NC4	NC5	NC6	NC7	NC8	NC9	VT1	VT10	VT11	VT12	VT2	VT3	VT4	VT5	VT6	VT7	VT8	VT9	GO Term	GO ID	KO ID	KO Name	Pathway ID	Pathway_defition	COG ID	COG_Functional Categories
P07911	Uromodulin OS=Homo sapiens OX=9606 GN=UMOD PE=1 SV=1	0.3283	-1.607	0.03101	down	yes	320200000000	975200000000	767214203017	823631021104	1589348623420	538304314282	514719931123	1242613162080	793646685582	379186247169	1.50084e+10	1788748771780	736622790213	158054902232	116318224563	8.61647e+10	676935886516	539127182425	3380473787360	844396150983	3841838817600	791712965040	855635896323	420453358164	234287836854	825189870249	259680733096	259817991774	285526613652	114621755017	183029695774	413292441150	437837815663	272470527212	135929395439	BP:cellular defense response;BP:ion homeostasis;BP:neutrophil migration;BP:metanephric distal convoluted tubule development;BP:negative regulation of cell proliferation;BP:excretion;BP:leukocyte cell-cell adhesion;BP:heterophilic cell-cell adhesion via plasma membrane cell adhesion molecules;BP:metanephric ascending thin limb development;BP:metanephric thick ascending limb developmentCC:ciliary m…	GO:0006968;GO:0050801;GO:1990266;GO:0072221;GO:0008285;GO:0007588;GO:0007159;GO:0007157;GO:0072218;GO:0072233GO:0060170;GO:0019898;GO:0005929;GO:0031225;GO:0070062;GO:0000922;GO:0005796;GO:0016324;GO:0016323;GO:0005576GO:0005509;GO:0019864	K18274	UMOD	------	------	------	------
P02768	Serum albumin OS=Homo sapiens OX=9606 GN=ALB PE=1 SV=2	3.37	1.753	0.007095	up	yes	174200000000	51690000000	3.56722e+09	1.91138e+10	8.79783e+09	1.00919e+10	3.93735e+09	4.84813e+09	183188385323	220000799913	2.41166e+10	9.24616e+10	228475243103	2.21679e+10	3.0291e+09	7.28469e+10	5.93721e+09	1.18638e+10	11188021046	1.81e+10	1.61602e+10	1.37309e+10	111767012110	381166835858	437875078649	1.36382e+10	329894966157	2.39011e+09	2.65963e+10	125886024007	170047626669	8.11908e+10	1.14521e+10	8.77768e+10	422383329064	BP:high-density lipoprotein particle remodeling;BP:maintenance of mitochondrion location;BP:cellular protein metabolic process;BP:platelet degranulation;BP:negative regulation of apoptotic process;BP:post-translational protein modification;BP:negative regulation of protein oligomerization;BP:cellular response to starvation;BP:retina homeostasis;BP:negative regulation of programmed cell death;BP:r…	GO:0034375;GO:0051659;GO:0044267;GO:0002576;GO:0043066;GO:0043687;GO:0032460;GO:0009267;GO:0001895;GO:0043069;GO:0006898GO:0005788;GO:0005783;GO:0070062;GO:0031093;GO:0072562;GO:0005794;GO:0005615;GO:0032991;GO:0005576;GO:0005634GO:0015643;GO:0008144;GO:0030170;GO:0003677;GO:0051087;GO:0005504;GO:0005507;GO:0042802;GO:0140272;GO:0016209;GO:0019825;GO:0046872;GO:1903981	K16141	ALB	hsa04918	Thyroid hormone synthesis	------	------
B4E1B2	cDNA FLJ53691, highly similar to Serotransferrin OS=Homo sapiens OX=9606 PE=2 SV=1	6.022	2.59	0.02433	up	yes	35190000000	5844000000	3.0056e+08	4.49365e+09	2.50368e+09	1.14992e+09	1.54736e+09	4.47545e+08	3.90029e+09	7.28331e+09	5.70775e+10	3.4556e+09	13618789132	2.00676e+09	1.87625e+08	7.9627e+09	3.97997e+08	3.22242e+09	6.71521e+08	1.46017e+09	2.76576e+09	1.77302e+09	6.49514e+09	3.10202e+10	4.19681e+10	7.86209e+09	4.02339e+10	4.33617e+08	2.20582e+09	6.97626e+10	1.0159e+10	5.83404e+09	8.00564e+08	1.55099e+10	196472821464	BP:cellular iron ion homeostasisCC:extracellular space;CC:cellMF:ferric iron binding;MF:ferric iron transmembrane transporter activity	GO:0006879GO:0005615;GO:0005623GO:0008199;GO:0015091	------	------	------	------	------	------
P01023	Alpha-2-macroglobulin OS=Homo sapiens OX=9606 GN=A2M PE=1 SV=3	3.15	1.655	0.02608	up	yes	18700000000	5937000000	2.36503e+09	1.63644e+09	3.28457e+09	4.40748e+09	1.31878e+09	2.87777e+09	6.47742e+09	3.93091e+09	1.26758e+10	1.3471e+10	4.69122e+08	9.5708e+08	6.46852e+08	4.39489e+10	2.67187e+09	1.29964e+09	1.68152e+10	2.15762e+09	1.37435e+09	1.02828e+09	8.72194e+08	6.4078e+10	2.24099e+09	9.9508e+08	4.06606e+10	1.84162e+09	6.99167e+09	6.89708e+09	4.44188e+09	43922394437	3.66854e+10	4.00221e+09	1.15972e+10	BP:regulation of small GTPase mediated signal transduction;BP:blood coagulation, intrinsic pathway;BP:stem cell differentiation;BP:platelet degranulation;BP:negative regulation of complement activation, lectin pathway;BP:extracellular matrix disassemblyCC:extracellular exosome;CC:platelet alpha granule lumen;CC:blood microparticle;CC:collagen-containing extracellular matrix;CC:extracellular space…	GO:0051056;GO:0007597;GO:0048863;GO:0002576;GO:0001869;GO:0022617GO:0070062;GO:0031093;GO:0072562;GO:0062023;GO:0005615;GO:0005829;GO:0005576GO:0019899;GO:0019959;GO:0019838;GO:0002020;GO:0019966;GO:0004866;GO:0004867;GO:0043120;GO:0048306;GO:0005102	K03910	A2M	hsa04610	Complement and coagulation cascades	COG2373	R:General function prediction only
P00450	Ceruloplasmin OS=Homo sapiens OX=9606 GN=CP PE=1 SV=1	3.964	1.987	0.02098	up	yes	16990000000	4286000000	2.10615e+08	4.58709e+09	3.44095e+09	6.52855e+09	2.30606e+09	2.52891e+09	3.95327e+09	5.11132e+09	16562286446	1.04159e+09	9066637646	7.30424e+09	2.75467e+08	5.57055e+09	1.93549e+09	1.8966e+09	1.64737e+09	1.66054e+09	1.75493e+09	7.58088e+09	5.04307e+09	82282513070	1.92108e+10	2.77357e+09	1.21582e+10	6.77897e+08	7.09686e+09	9.32905e+09	11367412046	1.81979e+09	1.58964e+09	11546806591	4.40506e+10	BP:cellular protein metabolic process;BP:cellular iron ion homeostasis;BP:post-translational protein modification;BP:iron ion homeostasis;BP:iron ion transport;BP:copper ion transportCC:extracellular exosome;CC:extracellular space;CC:blood microparticle;CC:cell;CC:lysosomal membrane;CC:endoplasmic reticulum lumen;CC:plasma membrane;CC:extracellular regionMF:ferroxidase activity;MF:chaperone bindi…	GO:0044267;GO:0006879;GO:0043687;GO:0055072;GO:0006826;GO:0006825GO:0070062;GO:0005615;GO:0072562;GO:0005623;GO:0005765;GO:0005788;GO:0005886;GO:0005576GO:0004322;GO:0051087;GO:0005507	K13624	CP	hsa00860;hsa04216	Porphyrin and chlorophyll metabolism;Ferroptosis	COG2132	Q:Secondary metabolites biosynthesis, transport and catabolism
A0A384MDQ7	Epididymis secretory sperm binding protein OS=Homo sapiens OX=9606 PE=2 SV=1	4.582	2.196	0.02474	up	yes	15800000000	3448000000	2.40311e+09	4.83377e+09	6.75096e+09	4.55022e+09	3.48554e+09	1.0106e+09	2.11184e+09	7.56877e+09	9.49211e+09	4.66899e+08	2.4374e+09	2.17119e+09	3.82413e+08	4.40433e+09	5.06024e+08	2.40386e+09	1.3582e+08	4.59479e+09	2.29461e+09	4.46137e+09	5.94172e+09	3.85163e+10	1.49897e+10	5.31734e+09	1.02991e+10	6.05328e+08	3.59643e+09	5.29314e+09	9.45291e+09	3.98176e+09	1.67141e+09	1.0764e+10	8.50965e+10	BP:COPII vesicle coating;BP:blood coagulation;BP:cellular protein metabolic process;BP:ER to Golgi vesicle-mediated transport;BP:platelet degranulation;BP:post-translational protein modification;BP:acute-phase response;BP:negative regulation of endopeptidase activity;BP:neutrophil degranulationCC:endoplasmic reticulum;CC:endoplasmic reticulum-Golgi intermediate compartment membrane;CC:endoplasmic…	GO:0048208;GO:0007596;GO:0044267;GO:0006888;GO:0002576;GO:0043687;GO:0006953;GO:0010951;GO:0043312GO:0005783;GO:0033116;GO:0005788;GO:1904813;GO:0030134;GO:0005615;GO:0031093;GO:0005794;GO:0062023;GO:0070062;GO:0043231;GO:0000139;GO:0005576GO:0002020;GO:0042802;GO:0004867	K03984	SERPINA1, AAT	hsa04610	Complement and coagulation cascades	COG4826	O:Posttranslational modification, protein turnover, chaperones
P00915	Carbonic anhydrase 1 OS=Homo sapiens OX=9606 GN=CA1 PE=1 SV=2	3.205	1.68	0.00745	up	yes	13110000000	4091000000	8.35304e+08	4.30757e+09	8.82068e+09	3.82583e+09	4.43484e+09	6.83139e+09	6.40734e+08	8.99736e+08	7.49449e+09	5.67181e+08	2.69318e+09	1.25743e+09	5.92062e+08	2.92206e+10	4.53211e+08	6.90013e+08	5.37818e+08	1.49939e+09	7.46259e+08	5.33112e+09	4.23769e+09	2.36963e+10	1.42537e+10	1.10572e+09	4.13597e+10	4.65426e+08	14897803936	5.60591e+09	4.74107e+09	1.213e+10	2.73901e+09	2.30919e+10	1.32878e+10	BP:bicarbonate transport;BP:one-carbon metabolic process;BP:interleukin-12-mediated signaling pathwayCC:cytoplasm;CC:extracellular exosome;CC:cytosolMF:hydro-lyase activity;MF:zinc ion binding;MF:carbonate dehydratase activity;MF:arylesterase activity	GO:0015701;GO:0006730;GO:0035722GO:0005737;GO:0070062;GO:0005829GO:0016836;GO:0008270;GO:0004089;GO:0004064	K01672	CA	hsa00910	Nitrogen metabolism	COG3338	P:Inorganic ion transport and metabolism
P01008	Antithrombin-III OS=Homo sapiens OX=9606 GN=SERPINC1 PE=1 SV=1	2.605	1.381	0.003546	up	yes	10280000000	3946000000	9.05549e+09	2.61722e+09	6.54985e+09	1.57994e+10	3.031e+09	2.39238e+09	1.64518e+09	3.24321e+09	9.04487e+09	1.2852e+09	3.11139e+09	2.23997e+09	4.36948e+08	1.61223e+09	5.20115e+08	4.70741e+09	1.85772e+09	3.03558e+09	3.43363e+09	2.51018e+09	4.72976e+09	2.62843e+10	8.28648e+09	3.84694e+09	1.58422e+10	2.43313e+08	4.20879e+09	9.379e+09	1.40519e+10	6.28543e+09	1.31369e+09	1.30911e+10	2.05009e+10	BP:acute inflammatory response to antigenic stimulus;BP:cellular protein metabolic process;BP:lactation;BP:response to nutrient;BP:blood coagulation;BP:negative regulation of endopeptidase activity;BP:post-translational protein modification;BP:regulation of blood coagulation, intrinsic pathwayCC:extracellular exosome;CC:blood microparticle;CC:collagen-containing extracellular matrix;CC:endoplasmi…	GO:0002438;GO:0044267;GO:0007595;GO:0007584;GO:0007596;GO:0010951;GO:0043687;GO:2000266GO:0070062;GO:0072562;GO:0062023;GO:0005788;GO:0005576;GO:0005886;GO:0005615GO:0008201;GO:0002020;GO:0004867;GO:0042802	K03911	SERPINC1, AT3	hsa04610	Complement and coagulation cascades	COG4826	O:Posttranslational modification, protein turnover, chaperones
P00738	Haptoglobin OS=Homo sapiens OX=9606 GN=HP PE=1 SV=1	3.625	1.858	0.02605	up	yes	10740000000	2963000000	5.10934e+08	3.43907e+09	8.56338e+07	1.02732e+09	7.59436e+07	9.33712e+08	4.57653e+08	3.06328e+08	16612111207	8.54106e+08	7.85871e+08	6.57918e+09	1.14256e+08	3.65907e+09	1.76059e+08	2.79215e+09	9.86521e+08	3.08505e+08	1.85035e+08	3.57849e+08	2.19852e+10	1.8793e+10	7.08938e+09	2.3905e+08	3.71326e+10	1.04018e+09	8.91089e+08	3.21713e+10	22445911514	2.67354e+09	9.33545e+08	1.77034e+09	3.69519e+09	BP:defense response to bacterium;BP:positive regulation of cell death;BP:negative regulation of hydrogen peroxide catabolic process;BP:defense response;BP:acute-phase response;BP:acute inflammatory response;BP:response to organic substance;BP:response to hydrogen peroxide;BP:receptor-mediated endocytosis;BP:neutrophil degranulation;BP:negative regulation of oxidoreductase activityCC:extracellular…	GO:0042742;GO:0010942;GO:2000296;GO:0006952;GO:0006953;GO:0002526;GO:0010033;GO:0042542;GO:0006898;GO:0043312;GO:0051354GO:0070062;GO:0071682;GO:0072562;GO:0035580;GO:1904724;GO:0005615;GO:0005576;GO:0031838GO:0004252;GO:0016209;GO:0030492	K16142	HP	------	------	COG5640	O:Posttranslational modification, protein turnover, chaperones
Q96PD5	N-acetylmuramoyl-L-alanine amidase OS=Homo sapiens OX=9606 GN=PGLYRP2 PE=1 SV=1	1.895	0.9222	0.04523	up	yes	7414000000	3912000000	7.59935e+08	1.56382e+09	2.90212e+09	1.19591e+09	1.27077e+10	2.83336e+09	3.77647e+09	6.91311e+09	6.3459e+09	4.66653e+08	1.14928e+10	8.49483e+09	4.37549e+08	1.11428e+09	1.62779e+08	9.24304e+09	3.7679e+08	2.62878e+09	1.95671e+09	2.96567e+09	3.81001e+09	1.46729e+10	8.39208e+09	1.32443e+10	7.55506e+09	3.00262e+08	3.93068e+09	1.26268e+09	5.50804e+09	3.28319e+09	2.07191e+09	1.90434e+10	9.70582e+09	BP:antimicrobial humoral response;BP:innate immune response;BP:detection of bacterium;BP:defense response to Gram-positive bacterium;BP:negative regulation of natural killer cell differentiation involved in immune response;BP:peptidoglycan catabolic process;BP:peptide amidationCC:extracellular exosome;CC:membrane;CC:extracellular region;CC:extracellular spaceMF:N-acetylmuramoyl-L-alanine amidase …	GO:0019730;GO:0045087;GO:0016045;GO:0050830;GO:0032827;GO:0009253;GO:0001519GO:0070062;GO:0016020;GO:0005576;GO:0005615GO:0008745;GO:0008270;GO:0016019;GO:0042834	K01446	PGRP	------	------	------	------
H0Y9Y3	Synaptopodin-2 (Fragment) OS=Homo sapiens OX=9606 GN=SYNPO2 PE=1 SV=1	0.209	-2.258	0.0398	down	yes	1703000000	8148000000	6.63146e+09	5.64122e+09	1.56067e+10	3.20151e+09	1.28098e+09	1.37064e+10	8.72518e+09	1.98633e+09	0	7.19759e+09	1.0145e+08	4.52366e+08	5.76479e+08	7.65007e+08	8.59216e+09	1.58985e+09	3.73722e+10	5.35241e+09	3.35152e+10	5.03958e+09	5627632951	3.51043e+09	1.29302e+09	2.29571e+09	5.32269e+08	5.97456e+08	1.09726e+09	2.66906e+09	6.86996e+08	3.04826e+09	3.66265e+09	5.36269e+08	5.0093e+08	------	------	------	------	------	------	------	------
A0A024R035	Complement component 9, isoform CRA_a OS=Homo sapiens OX=9606 GN=C9 PE=4 SV=1	4.662	2.221	0.003457	up	yes	7791000000	1671000000	8.32461e+08	2.00281e+09	2.65146e+09	2.46029e+09	1.5995e+09	1.08601e+09	9.35987e+08	1.77268e+09	6.455e+09	2.74033e+08	8.45515e+08	1.30933e+09	2.7548e+08	1.25349e+09	4.7573e+08	2.00144e+09	1.11588e+09	2.72998e+09	8.76685e+08	2.61382e+09	1.52336e+09	2.80938e+10	1.60016e+09	1.76196e+09	3.69471e+09	2.49894e+08	2.55213e+09	10449587899	8.79117e+09	4.99878e+09	3.17297e+09	2.25782e+10	5543389038	BP:cytolysis;BP:regulation of complement activation;BP:protein homooligomerization;BP:complement activation, alternative pathway;BP:immune response;BP:complement activation, classical pathway;BP:cell killingCC:extracellular exosome;CC:cytosol;CC:other organism cell membrane;CC:blood microparticle;CC:extracellular region;CC:plasma membrane;CC:membrane attack complex;CC:extracellular space	GO:0019835;GO:0030449;GO:0051260;GO:0006957;GO:0006955;GO:0006958;GO:0001906GO:0070062;GO:0005829;GO:0044218;GO:0072562;GO:0005576;GO:0005886;GO:0005579;GO:0005615	K04000	C9	hsa05322;hsa05146;hsa04610;hsa05020	Systemic lupus erythematosus;Amoebiasis;Complement and coagulation cascades;Prion diseases	------	------
B4DDT3	cDNA FLJ54622, highly similar to Prothrombin OS=Homo sapiens OX=9606 PE=2 SV=1	2.823	1.497	0.01372	up	yes	6256000000	2216000000	6.22882e+09	8.53359e+08	1.46553e+09	9.50195e+08	3.50802e+09	1.02762e+09	3.5273e+09	2.16157e+09	1.49277e+10	1.59512e+08	1.75227e+09	1.41125e+09	1.11133e+08	7.2771e+08	1.9885e+08	2.42383e+09	8.21916e+08	1.40425e+09	8.77571e+08	5.95472e+08	1.40403e+09	1.81929e+10	2.09926e+09	2.82146e+09	4.8614e+09	2.04699e+08	1.12141e+09	9.84315e+09	3.36791e+09	3.37424e+09	3.74869e+09	1.2625e+10	12811931069	BP:negative regulation of astrocyte differentiation;BP:positive regulation of cell growth;BP:blood coagulation, intrinsic pathway;BP:blood coagulation;BP:negative regulation of proteolysis;BP:positive regulation of release of sequestered calcium ion into cytosol;BP:leukocyte migration;BP:positive regulation of collagen biosynthetic process;BP:cell surface receptor signaling pathway;BP:regulation …	GO:0048712;GO:0030307;GO:0007597;GO:0007596;GO:0045861;GO:0051281;GO:0050900;GO:0032967;GO:0007166;GO:0030449;GO:0007275;GO:0061844;GO:0044267;GO:0006888;GO:0009611;GO:0051838;GO:0010544;GO:0006508;GO:0007186;GO:0010468;GO:0051918;GO:0008284;GO:2000379;GO:0046427;GO:0090218;GO:0070945;GO:0006953;GO:0008360;GO:0014068;GO:0030168;GO:1900016;GO:0042730;GO:1900182;GO:0051480;GO:1900738;GO:0030193;GO:…	K01313	F2	hsa04080;hsa04610;hsa04810	Neuroactive ligand-receptor interaction;Complement and coagulation cascades;Regulation of actin cytoskeleton	COG5640	O:Posttranslational modification, protein turnover, chaperones
B4E1Z4	cDNA FLJ55673, highly similar to Complement factor B OS=Homo sapiens OX=9606 PE=1 SV=1	2.33	1.22	0.03154	up	yes	5785000000	2483000000	3.41577e+09	5.03731e+08	5.34485e+09	8.90489e+08	5.89451e+09	1.3203e+09	2.75757e+09	2.57493e+09	4.5299e+09	6.73537e+08	1.26692e+09	2.74e+09	1.30831e+08	2.47555e+09	3.79416e+08	2.82942e+09	9.74331e+08	3.15592e+09	1.8529e+09	2.48997e+09	5.93484e+09	1.20286e+10	2.06639e+09	2.84364e+09	1.73368e+09	2.15523e+08	1.11091e+09	1.94879e+10	7.26e+09	8.30244e+08	3.29875e+09	1.52049e+10	3.33503e+09	MF:serine-type endopeptidase activity	GO:0004252	K01335	CFB	hsa04610;hsa05150	Complement and coagulation cascades;Staphylococcus aureus infection	COG5640	O:Posttranslational modification, protein turnover, chaperones
Q16769	Glutaminyl-peptide cyclotransferase OS=Homo sapiens OX=9606 GN=QPCT PE=1 SV=1	0.2785	-1.844	0.03152	down	yes	1694000000	6083000000	8.56226e+09	5.88582e+08	1.46411e+10	1.42809e+09	7.62601e+08	9.38034e+08	1.25401e+10	1.42033e+10	3.0237e+08	13878112777	1.1594e+10	1192631055	2.24963e+08	4.60261e+09	2.75939e+08	2.21839e+09	4.7414e+08	8.87166e+09	8.08745e+09	1.10637e+09	2.12417e+10	8.69453e+08	7.09201e+09	5.76462e+08	7.11405e+09	2.19148e+08	4.44232e+08	4.61834e+08	1.66781e+08	3.4742e+08	6.3426e+08	2.17053e+08	2.19059e+09	BP:peptidyl-pyroglutamic acid biosynthetic process, using glutaminyl-peptide cyclotransferase;BP:cellular protein modification process;BP:neutrophil degranulationCC:extracellular exosome;CC:ficolin-1-rich granule lumen;CC:extracellular region;CC:specific granule lumen;CC:tertiary granule lumenMF:glutaminyl-peptide cyclotransferase activity;MF:zinc ion binding	GO:0017186;GO:0006464;GO:0043312GO:0070062;GO:1904813;GO:0005576;GO:0035580;GO:1904724GO:0016603;GO:0008270	K00683	QPCT	------	------	------	------
P10153	Non-secretory ribonuclease OS=Homo sapiens OX=9606 GN=RNASE2 PE=1 SV=2	0.1036	-3.271	0.03194	down	yes	704400000	6801000000	9.95044e+07	4.03782e+08	2.61711e+09	2.544e+08	4.8659e+09	1.22322e+09	1.12022e+10	4.00424e+09	2.21532e+08	1.33969e+10	2.96966e+10	1.58379e+09	1.46543e+08	7.36536e+08	5.64129e+07	4.77717e+09	3.24383e+08	3.20962e+10	1.18767e+10	1.35234e+10	9.71425e+09	1.51844e+08	2.00241e+09	1.30057e+09	1.63532e+09	1.33681e+08	4.82877e+08	5.54892e+08	5.76552e+08	9.58655e+07	1.29433e+09	3.88785e+07	1.85781e+08	BP:RNA phosphodiester bond hydrolysis;BP:chemotaxis;BP:defense response to virus;BP:neutrophil degranulation;BP:RNA catabolic processCC:lysosome;CC:azurophil granule lumen;CC:extracellular region;CC:extracellular exosomeMF:endonuclease activity;MF:lyase activity;MF:ribonuclease activity;MF:nucleic acid binding	GO:0090501;GO:0006935;GO:0051607;GO:0043312;GO:0006401GO:0005764;GO:0035578;GO:0005576;GO:0070062GO:0004519;GO:0016829;GO:0004540;GO:0003676	K01168	RNASE1_2	------	------	------	------
Q16270	Insulin-like growth factor-binding protein 7 OS=Homo sapiens OX=9606 GN=IGFBP7 PE=1 SV=1	0.147	-2.766	0.02047	down	yes	930300000	6327000000	4.08175e+08	9.10625e+07	2.72938e+10	7.34581e+08	7.48343e+09	1.15109e+09	5.5536e+09	8.45868e+09	2.49047e+08	9.17802e+09	1.59045e+10	1.98401e+09	1.72915e+07	7.49802e+07	7.93844e+06	1.10053e+10	3.5787e+09	2.08968e+10	1.14983e+10	1.93678e+09	5.36344e+09	2.85647e+09	3.24223e+09	1.5083e+09	1.60425e+09	5.7856e+07	3.43005e+08	9.13733e+08	2.96867e+08	4.33207e+07	1.94472e+08	6.5568e+07	3.69252e+07	BP:cellular protein metabolic process;BP:response to retinoic acid;BP:negative regulation of cell proliferation;BP:embryo implantation;BP:response to cortisol;BP:cellular response to hormone stimulus;BP:regulation of cell growth;BP:regulation of steroid biosynthetic process;BP:cell adhesion;BP:response to heat;BP:post-translational protein modificationCC:extracellular exosome;CC:extracellular spa…	GO:0044267;GO:0032526;GO:0008285;GO:0007566;GO:0051414;GO:0032870;GO:0001558;GO:0050810;GO:0007155;GO:0009408;GO:0043687GO:0070062;GO:0005615;GO:0005788;GO:0062023;GO:0005576GO:0005520	------	------	------	------	------	------
A0A2Z4LCH4	Corticosteroid-binding globulin OS=Homo sapiens OX=9606 PE=2 SV=1	2.609	1.383	0.008246	up	yes	4414000000	1692000000	7.72204e+08	2.71623e+09	9.79454e+08	2.06154e+09	3.64277e+09	1.82402e+09	1.79049e+09	4.50262e+09	9.63036e+08	5.64638e+08	2.79519e+09	1.52855e+09	3.92189e+08	2.09973e+09	3.14942e+08	2.66074e+08	1.2213e+09	1.14326e+09	5.32143e+08	1.83281e+09	3.58941e+09	7.72541e+09	1.38318e+10	2.85299e+09	8.40306e+09	3.91052e+07	2.20295e+09	2.21e+09	2.97577e+09	1.52264e+09	6.81304e+08	2.19058e+09	8.33128e+09	BP:negative regulation of endopeptidase activity;BP:glucocorticoid metabolic processCC:extracellular space;CC:extracellular exosomeMF:serine-type endopeptidase inhibitor activity;MF:steroid binding	GO:0010951;GO:0008211GO:0005615;GO:0070062GO:0004867;GO:0005496	K04525	SERPINA	------	------	COG4826	O:Posttranslational modification, protein turnover, chaperones
O00560	Syntenin-1 OS=Homo sapiens OX=9606 GN=SDCBP PE=1 SV=1	1.808	0.8544	0.03119	up	yes	3761000000	2080000000	3.56187e+09	2.68669e+09	4.99912e+09	3.82011e+09	3.16863e+09	2.36868e+09	1.42512e+09	1.93203e+09	2.09319e+08	1.15146e+09	5.00827e+08	1.82854e+09	2.67784e+09	3.90193e+08	1.51977e+09	1.65338e+09	1.22699e+09	3.00934e+09	2.28488e+09	2.76868e+09	5.04963e+08	2.18301e+09	9.58987e+08	7.34515e+09	1.20237e+09	2.91048e+08	8.97586e+09	3.0561e+09	7.32964e+09	4.95289e+09	5.52289e+09	3.17334e+09	1.40598e+08	BP:positive regulation of cell proliferation;BP:negative regulation of proteasomal ubiquitin-dependent protein catabolic process;BP:positive regulation of cell growth;BP:protein targeting to membrane;BP:actin cytoskeleton organization;BP:positive regulation of extracellular exosome assembly;BP:intracellular signal transduction;BP:Ras protein signal transduction;BP:regulation of mitotic cell cycle…	GO:0008284;GO:0032435;GO:0030307;GO:0006612;GO:0030036;GO:1903553;GO:0035556;GO:0007265;GO:0007346;GO:0010862;GO:0007268;GO:1903543;GO:0006930;GO:0030335;GO:0046330;GO:0002091;GO:0048013;GO:0030511;GO:0042327;GO:0010718;GO:0043312;GO:0099054GO:0005789;GO:0035578;GO:0005895;GO:0005925;GO:0005737;GO:0070062;GO:0005634;GO:0016020;GO:0072562;GO:0005654;GO:0005856;GO:0031965;GO:0005912;GO:0005886;GO:1…	K17254	SDCBP	------	------	------	------
B7ZKQ8	Podocalyxin OS=Homo sapiens OX=9606 GN=PODXL PE=2 SV=1	2.877	1.525	0.004108	up	yes	4316000000	1500000000	3.79081e+08	4.30498e+09	3.43856e+09	1.86993e+09	2.62541e+09	1.41193e+09	5.79444e+08	1.81134e+09	3.15692e+09	8.59888e+08	1.17347e+09	9.26271e+08	3.06389e+07	3.06815e+08	1.7117e+09	9.87969e+08	1.33727e+09	1.39688e+09	1.02873e+09	1.75797e+09	3.97976e+08	7.26196e+09	2.33897e+09	7.01859e+09	7.5114e+08	8.68362e+08	1.33804e+10	3.86635e+09	7.63379e+09	2.49594e+08	3.88746e+09	4.29257e+09	2.38676e+08	BP:regulation of cell-cell adhesion;BP:negative regulation of cell adhesion;BP:cell adhesion;BP:cell migrationCC:cell projection;CC:apical plasma membrane;CC:integral component of membrane	GO:0022407;GO:0007162;GO:0007155;GO:0016477GO:0042995;GO:0016324;GO:0016021	------	------	------	------	------	------
A0A286YFJ8	Immunoglobulin heavy constant gamma 4 (Fragment) OS=Homo sapiens OX=9606 GN=IGHG4 PE=1 SV=1	7.949	2.991	0.00608	up	yes	5089000000	640200000	7.69468e+07	4.09165e+08	2.70258e+08	6.06033e+07	1.66164e+08	4.71225e+08	1.4113e+09	1.03643e+09	2.54837e+08	2.97359e+08	1.40976e+09	3.53414e+08	2.85546e+07	4.51267e+09	5.67422e+07	9.57517e+08	8.40624e+07	3.09751e+08	5.17402e+08	1.99101e+08	5.61467e+08	24077044182	4.68432e+09	7.47656e+07	7.00159e+09	0	2.76756e+08	3.34361e+09	3.35596e+09	2.0325e+09	4.18136e+08	2.00021e+09	8.70881e+09	BP:Fc-gamma receptor signaling pathway involved in phagocytosis;BP:B cell receptor signaling pathway;BP:regulation of complement activation;BP:cytokine-mediated signaling pathway;BP:innate immune response;BP:phagocytosis, recognition;BP:phagocytosis, engulfment;BP:complement activation;BP:defense response to bacterium;BP:complement activation, classical pathway;BP:positive regulation of B cell ac…	GO:0038096;GO:0050853;GO:0030449;GO:0019221;GO:0045087;GO:0006910;GO:0006911;GO:0006956;GO:0042742;GO:0006958;GO:0050871GO:0009897;GO:0005615;GO:0070062;GO:0005576;GO:0042571;GO:0072562GO:0003823;GO:0034987	------	------	------	------	------	------
P30044	Peroxiredoxin-5, mitochondrial OS=Homo sapiens OX=9606 GN=PRDX5 PE=1 SV=4	2.009	1.006	0.01462	up	yes	2943000000	1465000000	1.68327e+09	2.66767e+09	1.96314e+09	1.41409e+09	2.36302e+09	1.02392e+09	7.33345e+08	2.34794e+09	6.08301e+08	1.14793e+09	1.92861e+08	1.14275e+09	2.87106e+09	2.49281e+08	2.76657e+09	1.1286e+09	2.08461e+08	1.31658e+09	1.57137e+09	2.25199e+09	1.10621e+09	2.8728e+09	1.02197e+09	2.56325e+09	5.95936e+08	3.6483e+09	2.66553e+09	1.22401e+09	7.49448e+09	3.01755e+09	1.23964e+09	7.78544e+09	1.18124e+09	BP:reactive nitrogen species metabolic process;BP:hydrogen peroxide catabolic process;BP:cell redox homeostasis;BP:NADPH oxidation;BP:negative regulation of transcription from RNA polymerase III promoter;BP:regulation of apoptosis involved in tissue homeostasis;BP:negative regulation of apoptotic process;BP:cellular response to reactive oxygen species;BP:inflammatory response;BP:cellular response…	GO:2001057;GO:0042744;GO:0045454;GO:0070995;GO:0016480;GO:0060785;GO:0043066;GO:0034614;GO:0006954;GO:0034599;GO:0006979;GO:0051354;GO:0032967GO:0005782;GO:0005634;GO:0005737;GO:0070062;GO:0005777;GO:0005739;GO:0005759;GO:0048471;GO:0005615;GO:0043231;GO:0005829;GO:0031410GO:0001016;GO:0008379;GO:0046983;GO:0072541;GO:0043027;GO:0016209;GO:0051920;GO:0005102;GO:0004601	K11187	PRDX5	hsa04146	Peroxisome	COG0678	O:Posttranslational modification, protein turnover, chaperones
P01031	Complement C5 OS=Homo sapiens OX=9606 GN=C5 PE=1 SV=4	4.321	2.111	0.01341	up	yes	3416000000	790500000	1.02616e+09	3.90883e+08	1.32883e+09	5.10783e+08	6.65569e+08	4.1422e+08	4.62023e+08	1.10223e+09	4.12256e+09	3.29349e+08	1.78167e+08	4.50965e+08	6.78684e+07	1.43628e+09	1.74484e+08	7.26235e+08	3.62818e+08	1.73269e+09	2.92154e+08	5.38279e+08	2.88752e+08	4.05736e+09	2.14916e+08	7.47367e+08	1.15895e+09	1.41103e+08	6.87773e+08	1.45572e+10	4.25682e+09	2.28991e+09	1.14796e+09	1.01838e+10	1.55073e+09	BP:activation of MAPK activity;BP:regulation of complement activation;BP:inflammatory response;BP:cell surface receptor signaling pathway;BP:cytolysis;BP:in utero embryonic development;BP:positive regulation of angiogenesis;BP:negative regulation of macrophage chemotaxis;BP:G-protein coupled receptor signaling pathway;BP:chemotaxis;BP:positive regulation of chemokine secretion;BP:complement activ…	GO:0000187;GO:0030449;GO:0006954;GO:0007166;GO:0019835;GO:0001701;GO:0045766;GO:0010760;GO:0007186;GO:0006935;GO:0090197;GO:0006956;GO:0006957;GO:0006958;GO:0010575GO:0005615;GO:0070062;GO:0005576;GO:0005579GO:0008009;GO:0004866;GO:0005102	K03994	C5	hsa05133;hsa04610;hsa05322;hsa05168;hsa05150;hsa05020	Pertussis;Complement and coagulation cascades;Systemic lupus erythematosus;Herpes simplex infection;Staphylococcus aureus infection;Prion diseases	------	------
O75612	Carboxylic ester hydrolase (Fragment) OS=Homo sapiens OX=9606 PE=2 SV=1	0.2542	-1.976	0.02456	down	yes	788900000	3104000000	1.29652e+09	3.12692e+08	6.72989e+09	2.76853e+08	5.21957e+09	8.97991e+08	4.87305e+09	1.03046e+10	3.19856e+07	4.78753e+09	3.29718e+09	3.05735e+08	1.09987e+08	4.65986e+08	4.30466e+07	4.32245e+09	4.40717e+08	1.00913e+10	6.44937e+09	1.39378e+09	3.54245e+09	4.02962e+08	3.25487e+09	2.9882e+09	8.22404e+08	1.10692e+08	1.19753e+08	5.40283e+08	3.62299e+08	1.91251e+08	3.67028e+08	3.95156e+07	2.67298e+08	BP:pancreatic juice secretion;BP:cell differentiation;BP:modulation of synaptic transmission;BP:fatty acid catabolic process;BP:lipid digestion;BP:synaptic vesicle endocytosis;BP:protein esterification;BP:presynaptic membrane assembly;BP:postsynaptic membrane assembly;BP:cholesterol catabolic process;BP:lipid metabolic process;BP:intestinal cholesterol absorption;BP:neuron cell-cell adhesion;BP:i…	GO:0030157;GO:0030154;GO:0050804;GO:0009062;GO:0044241;GO:0048488;GO:0018350;GO:0097105;GO:0097104;GO:0006707;GO:0006629;GO:0030299;GO:0007158;GO:0044258;GO:0042363GO:0005783;GO:0005794;GO:0045202;GO:0005737;GO:0070062;GO:0009986;GO:0005887;GO:0005615;GO:0005576;GO:0098793GO:0038023;GO:0004771;GO:0016787;GO:0042043;GO:0016788;GO:0008201;GO:0004806;GO:0003824;GO:0016298	K12298	CEL	hsa00100;hsa00561;hsa04972;hsa04975	Steroid biosynthesis;Glycerolipid metabolism;Pancreatic secretion;Fat digestion and absorption	COG2272	I:Lipid transport and metabolism
P35858	Insulin-like growth factor-binding protein complex acid labile subunit OS=Homo sapiens OX=9606 GN=IGFALS PE=1 SV=1	2.039	1.028	0.03843	up	yes	2522000000	1237000000	2.01864e+09	1.53417e+08	1.78108e+09	4.49062e+08	2.36757e+09	7.02534e+08	7.16812e+08	3.95093e+09	4.43208e+09	1.82378e+08	1.12751e+09	1.24632e+09	6.7523e+07	3.98431e+07	3.78066e+08	1.7126e+09	2.23214e+08	2.27739e+09	8.7197e+08	4.70222e+08	8.08553e+08	3.2535e+09	3.38678e+08	4.01138e+09	6.21987e+08	3.5845e+08	1.13069e+09	8.05502e+09	2.1486e+09	3.70796e+09	2.39368e+09	3.4064e+09	8.347e+08	BP:cellular protein metabolic process;BP:signal transduction;BP:cell adhesionCC:extracellular exosome;CC:extracellular matrix;CC:nucleoplasm;CC:insulin-like growth factor ternary complex;CC:extracellular region;CC:extracellular spaceMF:insulin-like growth factor binding	GO:0044267;GO:0007165;GO:0007155GO:0070062;GO:0031012;GO:0005654;GO:0042567;GO:0005576;GO:0005615GO:0005520	K17256	IGFALS, ALS	------	------	COG4886	S:Function unknown
P05546	Heparin cofactor 2 OS=Homo sapiens OX=9606 GN=SERPIND1 PE=1 SV=3	2.631	1.396	0.009317	up	yes	2281000000	866900000	3.22315e+08	2.1766e+08	2.31406e+09	1.26294e+09	9.98033e+08	1.23034e+09	2.72753e+08	1.26815e+09	6.50459e+08	1.80032e+08	3.76466e+08	1.02081e+09	1.17103e+08	6.71633e+08	4.03134e+08	1.20767e+09	1.10652e+09	1.5474e+09	7.13454e+08	1898842773	4.25565e+08	2.36164e+09	7.55807e+08	1.79954e+09	4.68937e+08	1.99273e+08	5.54114e+08	5.25595e+09	4.45813e+09	3.02928e+09	2.5214e+08	6.96251e+09	1.26924e+09	BP:cellular protein metabolic process;BP:chemotaxis;BP:post-translational protein modification;BP:blood coagulation;BP:negative regulation of endopeptidase activityCC:extracellular exosome;CC:endoplasmic reticulum lumen;CC:extracellular region;CC:extracellular spaceMF:endopeptidase inhibitor activity;MF:serine-type endopeptidase inhibitor activity;MF:heparin binding	GO:0044267;GO:0006935;GO:0043687;GO:0007596;GO:0010951GO:0070062;GO:0005788;GO:0005576;GO:0005615GO:0004866;GO:0004867;GO:0008201	K03912	SERPIND1, HCF2	hsa04610	Complement and coagulation cascades	COG4826	O:Posttranslational modification, protein turnover, chaperones
P08697	Alpha-2-antiplasmin OS=Homo sapiens OX=9606 GN=SERPINF2 PE=1 SV=3	2.436	1.285	0.005501	up	yes	2100000000	862000000	2.44196e+08	6.42702e+08	1.35169e+09	3.15659e+08	2.00339e+09	5.32806e+08	2.55399e+08	7.06572e+08	7.91523e+08	3.05139e+08	9.39503e+08	1.2548e+09	1.45901e+08	1.16369e+09	3.64573e+07	1.56201e+09	1.0392e+08	2.09439e+09	1.47389e+09	9.14135e+08	1.26507e+09	2.70035e+09	1.79608e+09	3.01835e+09	7.65615e+08	1.54196e+08	5.66944e+08	8.66905e+08	2.99945e+09	1.61962e+09	2.26018e+09	6.70126e+09	1.75367e+09	BP:positive regulation of collagen biosynthetic process;BP:positive regulation of stress fiber assembly;BP:platelet degranulation;BP:blood vessel morphogenesis;BP:negative regulation of plasminogen activation;BP:negative regulation of fibrinolysis;BP:positive regulation of smooth muscle cell proliferation;BP:positive regulation of cell differentiation;BP:acute-phase response;BP:positive regulatio…	GO:0032967;GO:0051496;GO:0002576;GO:0048514;GO:0010757;GO:0051918;GO:0048661;GO:0045597;GO:0006953;GO:0046330;GO:0010951;GO:0010033;GO:0042730;GO:2000049;GO:0002034;GO:0030199;GO:0045944;GO:0070374;GO:0071636GO:0070062;GO:0031093;GO:0005577;GO:0072562;GO:0009986;GO:0062023;GO:0005615;GO:0005576GO:0002020;GO:0042803;GO:0004866;GO:0004867	K03983	SERPINF2, AAP	hsa04610	Complement and coagulation cascades	COG4826	O:Posttranslational modification, protein turnover, chaperones
A0A024R5Q4	Glycine amidinotransferase (L-arginine:glycine amidinotransferase), isoform CRA_a OS=Homo sapiens OX=9606 GN=GATM PE=4 SV=1	2.296	1.199	0.04204	up	yes	1980000000	862500000	3.10558e+08	1.18271e+09	3.02858e+09	8.91091e+08	2.43254e+09	8.55923e+08	5.12996e+08	5.63524e+08	1.16972e+08	1.27331e+08	3.20426e+08	9.93658e+07	1.7112e+08	2.19216e+08	8.64602e+08	4.47048e+08	1.14489e+08	1.33747e+09	1.14539e+09	2.2088e+09	1.16139e+09	1.14384e+09	3.33519e+08	9.44591e+08	2.38139e+08	3.9198e+08	3.31646e+09	1.092e+09	3.64795e+09	5.82456e+08	5.30922e+09	6.52724e+09	2.33576e+08	BP:muscle atrophy;BP:positive regulation of cold-induced thermogenesis;BP:creatine metabolic process;BP:creatine biosynthetic process;BP:learning or memory;BP:multicellular organism developmentCC:extracellular exosome;CC:mitochondrial inner membrane;CC:mitochondrion;CC:mitochondrial intermembrane spaceMF:amidinotransferase activity;MF:glycine amidinotransferase activity	GO:0014889;GO:0120162;GO:0006600;GO:0006601;GO:0007611;GO:0007275GO:0070062;GO:0005743;GO:0005739;GO:0005758GO:0015067;GO:0015068	K00613	GATM	hsa00260;hsa00330	Glycine, serine and threonine metabolism;Arginine and proline metabolism	------	------
P24539	ATP synthase F(0) complex subunit B1, mitochondrial OS=Homo sapiens OX=9606 GN=ATP5PB PE=1 SV=2	1.976	0.9826	0.01767	up	yes	1691000000	855900000	1.82989e+09	2.06371e+09	1.15544e+09	4.6671e+08	6.70275e+08	1.89947e+09	2.90547e+08	3.85805e+08	4.69141e+07	5.84676e+08	0	1.38731e+08	1.18448e+09	1.59498e+08	1.21982e+09	9.25847e+08	4.55857e+08	1.68777e+09	3.33937e+08	1.38356e+09	2.35805e+08	9.17692e+08	1.0693e+09	1.28333e+09	3.84519e+07	1.29558e+09	1.5609e+09	4.71872e+09	1.66163e+09	2.58303e+09	2.48509e+09	2.30731e+09	3.65051e+08	BP:mitochondrial ATP synthesis coupled proton transport;BP:ATP synthesis coupled proton transport;BP:substantia nigra development;BP:cristae formation;BP:ATP biosynthetic processCC:nucleus;CC:membrane;CC:mitochondrion;CC:nucleoplasm;CC:mitochondrial inner membrane;CC:mitochondrial proton-transporting ATP synthase complex;CC:mitochondrial matrix;CC:mitochondrial proton-transporting ATP synthase co…	GO:0042776;GO:0015986;GO:0021762;GO:0042407;GO:0006754GO:0005634;GO:0016020;GO:0005739;GO:0005654;GO:0005743;GO:0005753;GO:0005759;GO:0000276GO:0022857;GO:0015078	K02127	ATPeF0B, ATP5F1, ATP4	hsa05016;hsa05010;hsa05012;hsa00190	Huntington's disease;Alzheimer's disease;Parkinson's disease;Oxidative phosphorylation	------	------
O60218	Aldo-keto reductase family 1 member B10 OS=Homo sapiens OX=9606 GN=AKR1B10 PE=1 SV=2	2.748	1.458	0.03753	up	yes	1844000000	671100000	1.63549e+09	9.3227e+08	1.06557e+08	2.34382e+09	1.2531e+08	2.08617e+08	1.32622e+08	2.0667e+08	2.70186e+07	1.90606e+09	0	1.00761e+09	8.38072e+07	3.65616e+07	3.52058e+09	1.24559e+08	2.9385e+08	3.05101e+07	5.63255e+06	5.14643e+08	1.79901e+08	2.04641e+07	4.39768e+07	7.09157e+08	1.56622e+09	6.99802e+09	1.38088e+09	3.93108e+09	1.4997e+09	1.84752e+09	2.10948e+09	1.82342e+08	0	BP:farnesol catabolic process;BP:daunorubicin metabolic process;BP:cellular detoxification of aldehyde;BP:doxorubicin metabolic process;BP:retinoid metabolic processCC:cytosol;CC:mitochondrion;CC:lysosome;CC:extracellular regionMF:aldo-keto reductas;MF:alcohol dehydrogenas;MF:geranylgeranyl reductase activity;MF:aldito;MF:NADP-retinol dehydrogenase activity;MF:indanol dehydrogenase activity;MF:al…	GO:0016488;GO:0044597;GO:0110095;GO:0044598;GO:0001523GO:0005829;GO:0005739;GO:0005764;GO:0005576GO:0004033;GO:0008106;GO:0045550;GO:0004032;GO:0052650;GO:0047718;GO:0047655;GO:0001758;GO:0016491	K00011	AKR1B	hsa00561;hsa00040;hsa00052;hsa00051	Glycerolipid metabolism;Pentose and glucuronate interconversions;Galactose metabolism;Fructose and mannose metabolism	COG0656	R:General function prediction only
A0A5C2GH70	IG c941_heavy_IGHV3-7_IGHD3-3_IGHJ6 (Fragment) OS=Homo sapiens OX=9606 PE=2 SV=1	7.746	2.953	0.03898	up	yes	2186000000	282200000	4.64635e+07	5.00185e+08	1.01213e+09	1.86916e+08	1.18795e+08	1.31723e+08	2.28453e+08	4.52479e+08	6.44119e+07	1.70125e+08	3.4947e+08	7.65498e+07	1.42224e+08	1.5008e+08	1.1764e+08	1.16854e+08	1.99285e+07	2.72632e+08	2.82702e+08	5.25284e+08	9.61721e+08	3.45608e+09	2.25237e+09	1.61373e+08	1.85525e+09	0	1.66222e+08	4.12969e+08	7.02365e+08	3.44469e+08	1.06065e+08	5.2167e+08	1.40641e+10	------	------	------	------	------	------	------	------
Q9H223	EH domain-containing protein 4 OS=Homo sapiens OX=9606 GN=EHD4 PE=1 SV=1	2.089	1.063	0.01271	up	yes	1585000000	758800000	9.67118e+08	1.34354e+09	2.08074e+09	5.44284e+08	1.35273e+09	1.32703e+09	6.02981e+08	4.62607e+08	6.95292e+07	3.65e+08	3.05508e+07	5.19418e+08	6.49968e+08	3.45029e+08	7.21587e+08	1.00931e+09	6.79428e+08	9.42434e+08	3.86765e+08	1.42269e+09	1.11622e+08	8.92332e+08	3.10978e+08	2.9157e+09	2.64782e+08	4.72018e+08	2.5981e+09	3.3552e+09	3.66932e+09	1.78029e+09	1.52919e+09	1.0317e+09	1.99386e+08	BP:cellular response to growth factor stimulus;BP:positive regulation of peptidyl-tyrosine phosphorylation;BP:pinocytosis;BP:protein homooligomerization;BP:endocytic recycling;BP:regulation of endocytosisCC:endoplasmic reticulum;CC:extracellular exosome;CC:membrane;CC:early endosome membrane;CC:recycling endosome membrane;CC:cell;CC:plasma membrane;CC:perinuclear region of cytoplasm;CC:nucleusMF:…	GO:0071363;GO:0050731;GO:0006907;GO:0051260;GO:0032456;GO:0030100GO:0005783;GO:0070062;GO:0016020;GO:0031901;GO:0055038;GO:0005623;GO:0005886;GO:0048471;GO:0005634GO:0045296;GO:0003676;GO:0005525;GO:0005524;GO:0005509	K12477	EHD4	hsa04144	Endocytosis	------	------
Q5EBM2	Uncharacterized protein OS=Homo sapiens OX=9606 PE=1 SV=1	3.301	1.723	0.02495	up	yes	1750000000	530200000	8.0382e+07	2.001e+08	3.43651e+08	6.11108e+07	5.46174e+08	3.48592e+08	6.11238e+08	8.62844e+08	5.58528e+08	3.47458e+08	1.79922e+08	4.66215e+08	0	2.95915e+09	3.45242e+07	2.4981e+08	1.24658e+08	2.96091e+08	2.3764e+08	5.70225e+08	1.52539e+09	2.57797e+09	9.68212e+08	3.47772e+08	9.2241e+08	2.45816e+07	2.10197e+08	3.75517e+09	2.22419e+09	9.04141e+08	1.51913e+08	7.63573e+09	1.27595e+09	------	------	------	------	------	------	------	------
Q6UVK1	Chondroitin sulfate proteoglycan 4 OS=Homo sapiens OX=9606 GN=CSPG4 PE=1 SV=2	0.3493	-1.517	0.04171	down	yes	563800000	1614000000	2.44281e+08	1.04287e+08	3.4985e+09	4.90527e+08	3.38484e+08	4.09428e+08	3.23029e+09	4.47015e+09	1.14625e+08	1.63168e+09	1.21324e+09	1.43318e+09	6.32375e+07	4.75534e+08	1.45591e+08	1.97177e+08	2.22435e+09	5.79441e+09	2.17358e+09	2.26117e+09	3.37104e+09	7.139e+08	1.39864e+09	1.51181e+09	1.18879e+09	1.37429e+07	4.43904e+08	3.45314e+08	3.85636e+08	1.60017e+08	2.34774e+08	3.70789e+07	3.32138e+08	BP:activation of MAPK activity;BP:chondroitin sulfate catabolic process;BP:chondroitin sulfate biosynthetic process;BP:tissue remodeling;BP:dermatan sulfate biosynthetic process;BP:transmembrane receptor protein tyrosine kinase signaling pathway;BP:intracellular signal transduction;BP:cell proliferation;BP:angiogenesis;BP:glial cell migration;BP:positive regulation of peptidyl-tyrosine phosphoryl…	GO:0000187;GO:0030207;GO:0030206;GO:0048771;GO:0030208;GO:0007169;GO:0035556;GO:0008283;GO:0001525;GO:0008347;GO:0050731GO:0005925;GO:0043202;GO:0070062;GO:0031258;GO:0005796;GO:0016324;GO:0009986;GO:0062023;GO:0005887;GO:0005576GO:0019901	K08115	CSPG4	------	------	------	------
O00322	Uroplakin-1a OS=Homo sapiens OX=9606 GN=UPK1A PE=1 SV=1	2.089	1.063	0.04865	up	yes	1344000000	643400000	4.87301e+08	5.29599e+08	1.03003e+09	1.32224e+08	6.68967e+08	4.88134e+08	9.65492e+08	7.94054e+08	6.00203e+07	1.48498e+08	4.60779e+07	6.07392e+08	1.39882e+07	1.84688e+08	4.5555e+08	2.79527e+09	3.29694e+08	1.45524e+09	1.32442e+08	2.14116e+09	4.62242e+07	7.52379e+08	1.09847e+08	8.62406e+08	5.99932e+07	1.09451e+08	3.1215e+09	1.34291e+09	2.88804e+09	3.45641e+09	1.43932e+09	1.89787e+09	9.10919e+07	BP:protein oligomerization;BP:epithelial cell differentiationCC:endoplasmic reticulum;CC:extracellular exosome;CC:cell surface;CC:plasma membrane;CC:apical plasma membrane urothelial plaque;CC:integral component of plasma membrane;CC:integral component of membraneMF:protein homodimerization activity	GO:0051259;GO:0030855GO:0005783;GO:0070062;GO:0009986;GO:0005886;GO:0120001;GO:0005887;GO:0016021GO:0042803	K17347	UPK1	------	------	------	------
B7Z8B6	cDNA FLJ54395, highly similar to Inter-alpha-trypsin inhibitor heavy chain H1 OS=Homo sapiens OX=9606 PE=2 SV=1	2.19	1.131	0.03674	up	yes	1361000000	621600000	3.00325e+08	4.73179e+08	2.07657e+08	3.34415e+07	1.06135e+08	1.30039e+08	2.0025e+09	1.32914e+09	3.52084e+09	9.83907e+08	7.82191e+08	4.0555e+08	1.8153e+08	6.1079e+08	2.58513e+07	2.21146e+08	1.79292e+08	9.32694e+07	3.84487e+08	2.06976e+08	8.75821e+08	2.24368e+09	1.46366e+09	2.40582e+08	9.53991e+08	3.77114e+06	3.12616e+08	3.62274e+09	1.71781e+09	8.66592e+08	4.58216e+08	2.75264e+09	1.6934e+09	BP:hyaluronan metabolic processCC:extracellular exosome;CC:blood microparticle;CC:collagen-containing extracellular matrix;CC:extracellular regionMF:calcium ion binding;MF:serine-type endopeptidase inhibitor activity	GO:0030212GO:0070062;GO:0072562;GO:0062023;GO:0005576GO:0005509;GO:0004867	K19014	ITIH1, SHAP	------	------	COG2304	R:General function prediction only
A0A5C2GMQ3	IG c581_heavy_IGHV3-21_IGHD3-16_IGHJ4 (Fragment) OS=Homo sapiens OX=9606 PE=2 SV=1	2.785	1.478	0.01018	up	yes	1421000000	510300000	2.50852e+08	7.73714e+08	2.74842e+08	6.59152e+08	5.52752e+08	4.67695e+08	5.282e+08	2.00424e+08	1.14555e+09	5.36717e+08	7.10566e+08	3.44133e+08	1.21065e+07	1.61153e+09	7.02761e+08	1.21418e+08	1.50975e+08	5.23791e+08	3.26038e+07	5.99516e+08	5.16929e+08	1.97068e+09	1.63649e+09	1.94731e+08	1.07179e+09	8.7886e+08	5.53113e+08	1.37374e+09	4.53853e+08	3.99157e+08	1.20235e+09	1.61418e+09	5.70034e+09	------	------	------	------	------	------	------	------
P07358	Complement component C8 beta chain OS=Homo sapiens OX=9606 GN=C8B PE=1 SV=3	7.092	2.826	0.005223	up	yes	1688000000	238000000	5.50759e+08	1.13338e+08	4.84249e+08	2.92154e+08	9.22729e+07	2.44071e+08	1.05454e+08	3.07025e+08	1.46223e+09	2.59725e+07	4.81159e+07	1.00522e+08	1.31258e+07	3.52033e+08	1.03913e+08	7.28693e+07	5.06736e+07	1.94532e+08	1.23947e+08	1.9454e+08	6.54823e+07	3.409e+09	7.26542e+07	3.47128e+08	1.63889e+08	2.9537e+07	8.78369e+07	3.88363e+09	1.77864e+09	6.03119e+08	1.38446e+09	7.32341e+09	1.17425e+09	BP:cytolysis;BP:regulation of complement activation;BP:complement activation;BP:complement activation, alternative pathway;BP:immune response;BP:complement activation, classical pathwayCC:extracellular exosome;CC:membrane;CC:extracellular region;CC:extracellular vesicle;CC:membrane attack complexMF:macromolecular complex binding	GO:0019835;GO:0030449;GO:0006956;GO:0006957;GO:0006955;GO:0006958GO:0070062;GO:0016020;GO:0005576;GO:1903561;GO:0005579GO:0044877	K03998	C8B	hsa05322;hsa05146;hsa04610;hsa05020	Systemic lupus erythematosus;Amoebiasis;Complement and coagulation cascades;Prion diseases	------	------
K7EPJ4	Cartilage intermediate layer protein 2 OS=Homo sapiens OX=9606 GN=CILP2 PE=1 SV=1	0.3675	-1.444	0.01638	down	yes	508600000	1384000000	1.18556e+09	1.35605e+09	1.91887e+09	1.09416e+09	2.36658e+09	1.51691e+09	1.99668e+09	2.05967e+09	2.58787e+08	9.17864e+08	8.2735e+08	3.98335e+08	1.10053e+08	1.80934e+08	1.06842e+09	4.02225e+08	2.80489e+09	1.71892e+09	5.00177e+09	8.94226e+08	9.83757e+08	4.39559e+08	2.81929e+08	1.03491e+09	6.45776e+08	1.90188e+08	2.84704e+08	1.52643e+08	1.6742e+08	3.29433e+08	2.08223e+09	3.28855e+08	1.65557e+08	BP:dephosphorylationCC:extracellular exosome	GO:0016311GO:0070062	------	------	------	------	------	------
P41181	Aquaporin-2 OS=Homo sapiens OX=9606 GN=AQP2 PE=1 SV=1	2.351	1.233	0.03859	up	yes	1325000000	563700000	1.26428e+08	8.95732e+08	3.88958e+09	4.37754e+08	6.28664e+08	5.86766e+08	1.12568e+08	3.83093e+08	4.48793e+06	1.27894e+08	6.75257e+08	2.79704e+07	2.37036e+07	1.4652e+08	8.57598e+08	2.2638e+08	5.76616e+08	4.71527e+08	1.14838e+09	3.56667e+08	1.33918e+08	9.95082e+08	2.93471e+08	3.45362e+09	7.7609e+07	8.81274e+07	3.24123e+09	1.98242e+09	1.61599e+09	6.48923e+08	2.15784e+09	1.28727e+09	5.86026e+07	BP:protein homotetramerization;BP:renal water homeostasis;BP:metanephric collecting duct development;BP:renal water transport;BP:glycerol transport;BP:water transport;BP:cellular response to water deprivation;BP:cellular response to copper ion;BP:cellular response to mercury ionCC:lumenal side of membrane;CC:recycling endosome;CC:extracellular exosome;CC:integral component of membrane;CC:membrane…	GO:0051289;GO:0003091;GO:0072205;GO:0003097;GO:0015793;GO:0006833;GO:0042631;GO:0071280;GO:0071288GO:0098576;GO:0055037;GO:0070062;GO:0016021;GO:0016020;GO:0005794;GO:0016324;GO:0016323;GO:0030658;GO:0005887;GO:0005886GO:0015250;GO:0015168;GO:0005372;GO:0015267	K09865	AQP2	hsa04962	Vasopressin-regulated water reabsorption	COG0580	G:Carbohydrate transport and metabolism
B4DVZ2	cDNA FLJ54185, highly similar to Myocilin OS=Homo sapiens OX=9606 PE=2 SV=1	4.461	2.157	0.0385	up	yes	1511000000	338700000	1.20801e+08	2.20733e+08	6.52561e+08	2.39587e+08	7.24402e+08	2.71617e+08	5.47367e+08	2.52647e+08	5.67377e+07	4.06542e+07	1.03952e+08	8.39427e+07	6.54664e+07	9.72274e+08	7.12954e+07	3.83149e+08	1.44603e+08	0	9.89187e+08	4.76057e+08	3.56819e+08	4.03289e+08	4.75521e+08	8.41979e+08	2.00458e+09	0	1.21507e+09	3.34794e+08	4.13621e+08	6.32788e+08	6.87452e+08	8.65736e+09	9.5573e+08	BP:positive regulation of cell migration;BP:regulation of cell-matrix adhesion;BP:regulation of stress fiber assemblyCC:extracellular space	GO:0030335;GO:0001952;GO:0051492GO:0005615	------	------	------	------	------	------
P18065	Insulin-like growth factor-binding protein 2 OS=Homo sapiens OX=9606 GN=IGFBP2 PE=1 SV=2	0.3506	-1.512	0.04555	down	yes	462500000	1319000000	1.48528e+08	4.01119e+07	2.34448e+09	2.13547e+08	2.66879e+09	4.16199e+07	8.89536e+08	2.31137e+09	9.68512e+08	6.00742e+08	1.42919e+09	3.99504e+09	2.19047e+07	2.34747e+07	0	1.42319e+09	1.44451e+07	2.76414e+09	2.37667e+09	3.58127e+09	5.21265e+08	9.30814e+07	8.85373e+08	2.67602e+09	1.68001e+08	1.68069e+07	2.47205e+08	7.21446e+08	1.38985e+08	1.29845e+07	2.7548e+08	2.43758e+08	7.13612e+07	BP:response to glucocorticoid;BP:signal transduction;BP:cellular protein metabolic process;BP:response to estradiol;BP:regulation of insulin-like growth factor receptor signaling pathway;BP:regulation of growth;BP:response to mechanical stimulus;BP:negative regulation of canonical Wnt signaling pathway;BP:response to retinoic acid;BP:positive regulation of activated T cell proliferation;BP:respon…	GO:0051384;GO:0007165;GO:0044267;GO:0032355;GO:0043567;GO:0040008;GO:0009612;GO:0090090;GO:0032526;GO:0042104;GO:0007584;GO:0032870;GO:0043627;GO:0010226;GO:0007568;GO:0007565;GO:0042493GO:0005615;GO:0031410;GO:0016324;GO:0070062;GO:0005576GO:0031994;GO:0031995;GO:0005102	------	------	------	------	------	------
O00526	Uroplakin-2 OS=Homo sapiens OX=9606 GN=UPK2 PE=1 SV=2	2.391	1.258	0.02697	up	yes	1251000000	523300000	4.08432e+08	4.98928e+08	1.17774e+09	1.58493e+08	5.47101e+08	4.82177e+08	6.69183e+08	6.78373e+08	8.56794e+07	1.59797e+08	7.64694e+07	2.32263e+07	2.37215e+07	2.14535e+08	3.89171e+08	2.15994e+09	2.1899e+08	1.42317e+09	8.05474e+07	1.38635e+09	1.26585e+08	7.5072e+08	1.73467e+08	7.55296e+08	1.85013e+07	1.57194e+08	2.92922e+09	2.81059e+09	2.45169e+09	3.23252e+09	7.13551e+08	9.82159e+08	3.8695e+07	BP:epithelial cell differentiation;BP:multicellular organism developmentCC:extracellular exosome;CC:apical plasma membrane;CC:integral component of membrane;CC:integral component of plasma membrane	GO:0030855;GO:0007275GO:0070062;GO:0016324;GO:0016021;GO:0005887	------	------	------	------	------	------
P13804	Electron transfer flavoprotein subunit alpha, mitochondrial OS=Homo sapiens OX=9606 GN=ETFA PE=1 SV=1	2.222	1.152	0.03489	up	yes	1221000000	549500000	9.16691e+08	1.15229e+09	6.21013e+08	3.09832e+08	7.7682e+08	1.06497e+09	6.60246e+08	2.36393e+08	8.46777e+07	4.86594e+08	2.65754e+07	1.21096e+08	9.35135e+08	1.39923e+08	9.17725e+08	3.9718e+08	6.58345e+07	8.86268e+08	4.54554e+08	1.13894e+09	1.47594e+08	2.97384e+08	9.25965e+07	7.12799e+08	8.03445e+07	1.13181e+09	1.21554e+09	3.48904e+09	9.23828e+08	1.52281e+09	4.11633e+09	1.06046e+09	6.13986e+06	BP:fatty acid beta-oxidation using acyl-CoA dehydrogenase;BP:respiratory electron transport chainCC:mitochondrion;CC:mitochondrial matrixMF:flavin adenine dinucleotide binding;MF:oxidoreductase activity;MF:electron carrier activity	GO:0033539;GO:0022904GO:0005739;GO:0005759GO:0050660;GO:0016491;GO:0009055	K03522	fixB, etfA	------	------	COG2025	C:Energy production and conversion
P36957	Dihydrolipoyllysine-residue succinyltransferase component of 2-oxoglutarate dehydrogenase complex, mitochondrial OS=Homo sapiens OX=9606 GN=DLST PE=1 SV=4	3.787	1.921	0.04793	up	yes	1187000000	313400000	5.10247e+08	3.85068e+08	3.60581e+08	5.7614e+08	7.59955e+08	1.52048e+08	9.90897e+07	2.20142e+08	3.16548e+08	1.043e+08	2.62722e+07	6.40576e+08	1.30933e+08	7.44044e+07	1.48873e+08	6.25545e+08	1.56875e+08	4.06987e+08	4.42208e+08	3.47001e+08	9.81377e+07	9.11566e+07	9.09536e+07	2.4907e+08	0	1.19997e+08	3.36285e+08	5.42584e+09	5.20109e+08	2.38208e+08	4.24216e+09	5.54433e+08	0	BP:histone succinylation;BP:2-oxoglutarate metabolic process;BP:L-lysine catabolic process to acetyl-CoA via saccharopine;BP:succinyl-CoA metabolic process;BP:tricarboxylic acid cycle;BP:generation of precursor metabolites and energy;BP:lysine catabolic processCC:oxoglutarate dehydrogenase complex;CC:nucleus;CC:membrane;CC:mitochondrion;CC:mitochondrial matrixMF:dihydrolipoyllysine-residue succin…	GO:0106077;GO:0006103;GO:0033512;GO:0006104;GO:0006099;GO:0006091;GO:0006554GO:0045252;GO:0005634;GO:0016020;GO:0005739;GO:0005759GO:0004149	K00658	DLST, sucB	hsa00310;hsa01200;hsa00020	Lysine degradation;Carbon metabolism;Citrate cycl	COG0508	C:Energy production and conversion
O95498	Vascular non-inflammatory molecule 2 OS=Homo sapiens OX=9606 GN=VNN2 PE=1 SV=3	2.596	1.376	0.02664	up	yes	1051000000	404900000	1.4522e+09	7.38626e+07	2.07206e+08	6.12727e+08	6.41119e+07	8.62588e+08	7.02699e+07	1.91912e+08	2.41541e+07	3.80875e+08	5.32456e+07	8.55635e+08	2.27599e+09	9.68681e+07	5.78905e+08	7.94403e+07	1.2933e+08	2.17167e+08	1.58328e+08	1.9196e+07	9.87695e+07	4.47853e+08	4.05749e+08	5.35728e+08	3.90598e+08	4.88952e+08	3.97656e+08	2.50807e+09	6.88133e+08	3.33373e+09	5.81869e+08	4.99609e+08	2.33847e+09	BP:pantothenate metabolic processCC:integral component of membrane;CC:extracellular region;CC:plasma membrane;CC:anchored component of membraneMF:pantetheine hydrolase activity	GO:0015939GO:0016021;GO:0005576;GO:0005886;GO:0031225GO:0017159	K08069	VNN	hsa00770	Pantothenate and CoA biosynthesis	COG0388	R:General function prediction only
Q6PKA6	ALDH3A1 protein (Fragment) OS=Homo sapiens OX=9606 GN=ALDH3A1 PE=2 SV=1	2.642	1.402	0.02525	up	yes	961700000	364000000	8.43572e+08	2.64146e+08	2.85267e+07	5.60159e+08	5.19814e+08	1.24647e+08	1.03624e+08	1.62494e+08	3.92181e+08	2.50541e+08	1.21936e+08	7.70618e+08	1.91929e+08	4.03527e+07	1.55875e+09	2.99328e+08	1.29823e+08	0	5.19829e+07	6.60374e+08	2.05142e+08	1.81331e+08	2.18799e+08	4.60644e+08	1.92726e+08	3.14287e+09	7.78928e+08	2.4521e+09	8.32682e+08	2.22646e+09	5.99093e+08	2.1956e+08	2.353e+08	BP:positive regulation of cell proliferation;BP:response to nutrient;BP:response to drug;BP:xenobiotic metabolic process;BP:response to cAMP;BP:aging;BP:response to hypoxia;BP:response to glucocorticoid;BP:oxidation-reduction process;BP:cellular aldehyde metabolic processCC:integral component of membrane;CC:extracellular space;CC:plasma membrane;CC:endoplasmic reticulum;CC:cytosolMF:alcohol dehyd…	GO:0008284;GO:0007584;GO:0042493;GO:0006805;GO:0051591;GO:0007568;GO:0001666;GO:0051384;GO:0055114;GO:0006081GO:0016021;GO:0005615;GO:0005886;GO:0005783;GO:0005829GO:0008106;GO:0004030;GO:0004028;GO:0004029;GO:0016620;GO:0018479	K00129	E1.2.1.5	hsa00980;hsa00982;hsa05204;hsa00340;hsa00360;hsa00010;hsa00350;hsa00410	Metabolism of xenobiotics by cytochrome P450;Drug metabolism - cytochrome P450;Chemical carcinogenesis;Histidine metabolism;Phenylalanine metabolism;Glycolysis / Gluconeogenesis;Tyrosine metabolism;beta-Alanine metabolism	COG1012	C:Energy production and conversion
B2R659	cDNA, FLJ92803, highly similar to Homo sapiens hydroxysteroid (17-beta) dehydrogenase 4 (HSD17B4), mRNA OS=Homo sapiens OX=9606 PE=2 SV=1	2.014	1.01	0.01411	up	yes	864100000	429100000	1.21215e+09	3.92141e+08	1.56611e+08	3.46532e+08	1.07717e+09	5.17332e+08	4.33917e+08	2.22384e+08	9.37833e+07	3.79967e+08	4.35731e+07	1.63986e+08	6.13999e+08	3.92962e+08	1.06398e+09	4.70218e+08	2.94317e+08	2.1057e+08	5.0565e+07	7.19945e+08	1.54578e+08	3.74764e+08	6.87879e+08	3.57822e+08	3.32327e+08	2.3676e+09	1.00927e+09	2.80609e+08	5.9634e+08	1.30397e+09	1.09749e+09	1.49617e+09	4.64632e+08	BP:fatty acid beta-oxidation;BP:Sertoli cell development;BP:estrogen metabolic process;BP:osteoblast differentiation;BP:fatty acid beta-oxidation using acyl-CoA oxidase;BP:protein targeting to peroxisome;BP:alpha-linolenic acid metabolic process;BP:androgen metabolic process;BP:very long-chain fatty acid metabolic process;BP:very long-chain fatty-acyl-CoA metabolic process;BP:medium-chain fatty-a…	GO:0006635;GO:0060009;GO:0008210;GO:0001649;GO:0033540;GO:0006625;GO:0036109;GO:0008209;GO:0000038;GO:0036111;GO:0036112;GO:0006699GO:0005782;GO:0005778;GO:0016020;GO:0005777;GO:0005829GO:0003857;GO:0016491;GO:0044594;GO:0042803;GO:0033989;GO:0016853;GO:0016508;GO:0005102	K12405	HSD17B4	hsa00120;hsa04146	Primary bile acid biosynthesis;Peroxisome	COG2030	I:Lipid transport and metabolism
A0A5C2H0F4	IG c416_light_IGKV3-20_IGKJ5 (Fragment) OS=Homo sapiens OX=9606 PE=2 SV=1	2.084	1.059	0.04111	up	yes	797400000	382700000	2.04575e+07	6.97573e+07	7.46987e+07	1.48377e+08	1.75951e+08	6.53912e+08	1.04078e+09	4.09565e+08	8.27036e+07	2.15336e+08	6.26235e+08	6.69002e+08	0	5.8811e+08	6.75637e+07	4.76041e+08	5.43118e+07	0	4.03328e+07	6.6808e+08	1.18946e+09	3.53263e+08	2.47177e+09	0	9.10298e+08	0	5.33321e+08	6.05905e+08	3.42171e+08	5.42683e+08	0	3.85098e+08	1.03193e+09	------	------	------	------	------	------	------	------
Q53HS0	Glutaminyl-tRNA synthetase variant (Fragment) OS=Homo sapiens OX=9606 PE=2 SV=1	2.154	1.107	0.02846	up	yes	787300000	365500000	3.98767e+08	8.68127e+08	3.92583e+08	5.41216e+08	6.54035e+08	4.60515e+08	9.02387e+07	3.15047e+08	2.30507e+07	3.45934e+08	1.30598e+07	2.34395e+08	6.3946e+08	1.26937e+08	1.10184e+09	9.54236e+07	5.87763e+07	3.47964e+08	1.74835e+08	7.31589e+08	6.24951e+07	6.32375e+08	4.13247e+08	6.84013e+08	3.57128e+08	1.52188e+09	9.75803e+08	2.81649e+09	2.22906e+08	9.14008e+08	1.79714e+08	2.20597e+08	5.0943e+08	BP:negative regulation of apoptotic signaling pathway;BP:glutaminyl-tRNA aminoacylation;BP:brain development;BP:negative regulation of stress-activated MAPK cascade;BP:negative regulation of protein kinase activity;BP:negative regulation of transcription, DNA-templated;BP:tRNA aminoacylation for protein translationCC:cytoplasm;CC:aminoacyl-tRNA synthetase multienzyme complex;CC:macromolecular com…	GO:2001234;GO:0006425;GO:0007420;GO:0032873;GO:0006469;GO:0045892;GO:0006418GO:0005737;GO:0017101;GO:0032991;GO:0005829;GO:0005759GO:0004819;GO:0004860;GO:0019901;GO:0005524	K01886	QARS, glnS	hsa00970	Aminoacyl-tRNA biosynthesis	COG0008	J:Translation, ribosomal structure and biogenesis
P43652	Afamin OS=Homo sapiens OX=9606 GN=AFM PE=1 SV=1	2.991	1.581	0.02486	up	yes	822600000	275000000	2.373e+08	2.48651e+07	2.41406e+07	4.36529e+08	0	3.8734e+07	2.12054e+08	5.98488e+08	4.28919e+08	2.19439e+08	2.04209e+09	1.03553e+08	1.28409e+07	6.85504e+07	4.88031e+07	1.25786e+08	1.25283e+08	9.48833e+07	2.18044e+07	7.03396e+07	5.64774e+08	2.22806e+09	1.28635e+09	9.90217e+07	1.68982e+09	1.68405e+07	7.41842e+07	9.414e+08	1.88251e+08	3.80316e+08	5.63914e+08	7.72502e+07	2.32583e+09	BP:vitamin transport;BP:protein stabilization;BP:protein transport within extracellular regionCC:extracellular space;CC:blood microparticle;CC:extracellular region;CC:extracellular exosomeMF:vitamin E binding;MF:metal ion binding	GO:0051180;GO:0050821;GO:0071693GO:0005615;GO:0072562;GO:0005576;GO:0070062GO:0008431;GO:0046872	------	------	------	------	------	------
P29317	Ephrin type-A receptor 2 OS=Homo sapiens OX=9606 GN=EPHA2 PE=1 SV=2	3.083	1.624	0.03154	up	yes	822900000	266900000	4.74536e+08	2.99874e+08	2.72583e+08	1.68209e+08	1.32661e+08	5.681e+07	2.50482e+08	1.90231e+07	0	4.58007e+08	0	1.609e+08	4.3479e+08	1.3938e+09	2.84903e+08	3.9465e+07	1.90348e+08	1.21367e+08	9.54425e+07	5.00697e+07	1.66969e+08	1.54652e+09	6.25387e+07	1.15598e+08	7.43596e+08	2.05308e+08	4.12622e+08	1.01072e+08	3.61238e+08	2.86025e+09	1.94281e+08	2.44937e+09	0	BP:vasculogenesis;BP:inflammatory response;BP:activation of GTPase activity;BP:mammary gland epithelial cell proliferation;BP:regulation of angiogenesis;BP:skeletal system development;BP:negative regulation of protein kinase B signaling;BP:cell chemotaxis;BP:transmembrane receptor protein tyrosine kinase signaling pathway;BP:multicellular organism development;BP:osteoblast differentiation;BP:kera…	GO:0001570;GO:0006954;GO:0090630;GO:0033598;GO:0045765;GO:0001501;GO:0051898;GO:0060326;GO:0007169;GO:0007275;GO:0001649;GO:0030216;GO:0070848;GO:0036342;GO:0033628;GO:0060035;GO:0060444;GO:1904238;GO:0016477;GO:0007411;GO:1903348;GO:0002043;GO:0070309;GO:0021915;GO:0030182;GO:0030316;GO:1903078;GO:1901491;GO:0046058;GO:0050830;GO:0007155;GO:0048013;GO:0072659;GO:0010591;GO:0008630;GO:0048870;GO:…	K05103	EPHA2, ECK	hsa04360;hsa04015;hsa04014;hsa04151	Axon guidance;Rap1 signaling pathway;Ras signaling pathway;PI3K-Akt signaling pathway	COG0515	T:Signal transduction mechanisms
A0A5C2GRG5	IG c376_light_IGLV3-21_IGLJ2 (Fragment) OS=Homo sapiens OX=9606 PE=2 SV=1	5.786	2.533	0.001428	up	yes	872000000	150700000	0	4.3084e+07	8.80383e+07	7.53383e+07	1.2186e+08	1.00336e+08	3.08338e+07	1.20726e+08	1.41704e+09	5.51104e+06	4.0105e+08	5.33007e+07	1.18217e+07	7.66763e+07	5.78943e+07	1.14674e+08	2.01154e+07	7.77441e+07	6.74848e+07	5.11701e+07	7.96943e+07	1.91732e+09	4.36253e+08	1.17414e+08	3.27405e+08	9.97611e+07	1.73441e+08	1.46525e+09	9.2679e+08	6.84699e+08	2.68447e+08	2.74163e+09	1.30549e+09	------	------	------	------	------	------	------	------
P08572	Collagen alpha-2(IV) chain OS=Homo sapiens OX=9606 GN=COL4A2 PE=1 SV=4	0.2387	-2.067	0.04201	down	yes	168400000	705400000	1.23462e+07	1.64371e+07	7.15613e+08	0	2.7784e+09	5.97646e+06	8.95379e+08	2.45851e+09	1.14828e+09	3.08632e+08	6.24033e+08	4.46284e+08	7.808e+06	8.2526e+07	8.25875e+06	2.91551e+08	6.85791e+07	1.23358e+09	1.77845e+09	7.90513e+08	4.35928e+08	8.74074e+07	4.31188e+08	4.85637e+08	4.71332e+07	6.92988e+06	5.05881e+07	2.20659e+08	0	2.96373e+07	4.57903e+08	1.90168e+07	1.66459e+07	BP:aging;BP:collagen-activated tyrosine kinase receptor signaling pathway;BP:response to activity;BP:cellular response to transforming growth factor beta stimulus;BP:extracellular matrix organization;BP:transcription, DNA-templated;BP:angiogenesis;BP:endodermal cell differentiation;BP:negative regulation of angiogenesisCC:collagen type IV trimer;CC:extracellular exosome;CC:extracellular space;CC:…	GO:0007568;GO:0038063;GO:0014823;GO:0071560;GO:0030198;GO:0006351;GO:0001525;GO:0035987;GO:0016525GO:0005587;GO:0070062;GO:0005615;GO:0005788;GO:0031012;GO:0005576;GO:0005581;GO:0062023GO:0005201;GO:0030020	K06237	COL4A	hsa04974;hsa05200;hsa05146;hsa05222;hsa04510;hsa04512;hsa04151;hsa04933	Protein digestion and absorption;Pathways in cancer;Amoebiasis;Small cell lung cancer;Focal adhesion;ECM-receptor interaction;PI3K-Akt signaling pathway;AGE-RAGE signaling pathway in diabetic complications	------	------
A8K169	cDNA FLJ77252, highly similar to Homo sapiens protein tyrosine phosphatase, receptor type, O (PTPRO), transcript variant 1, mRNA OS=Homo sapiens OX=9606 PE=2 SV=1	4.824	2.27	0.03524	up	yes	711100000	147400000	2.22813e+07	3.24891e+08	4.30726e+08	5.80786e+08	1.71819e+08	1.09235e+08	6.73744e+07	1.98231e+08	1.71642e+08	5.06537e+07	1.79774e+07	1.31482e+08	3.3722e+07	7.32511e+07	1.41204e+08	1.2622e+08	1.71009e+08	6.23922e+07	5.15104e+07	1.3841e+08	2.11608e+07	4.77143e+08	1.83246e+08	3.84341e+08	1.94887e+08	5.3454e+07	9.31463e+08	4.31563e+09	6.98421e+08	1.09995e+08	4.32027e+08	7.40842e+08	1.19191e+07	BP:protein dephosphorylation;BP:lamellipodium assembly;BP:negative regulation of retinal ganglion cell axon guidance;BP:regulation of synapse organization;BP:axon guidance;BP:peptidyl-tyrosine dephosphorylation;BP:glomerular visceral epithelial cell differentiation;BP:cell morphogenesis;BP:regulation of glomerular filtration;BP:negative regulation of canonical Wnt signaling pathway;BP:negative re…	GO:0006470;GO:0030032;GO:0090260;GO:0050807;GO:0007411;GO:0035335;GO:0072112;GO:0000902;GO:0003093;GO:0090090;GO:0010812;GO:0032835;GO:0010977;GO:0003105;GO:0036060;GO:0002548GO:0030426;GO:0030424;GO:0099061;GO:0098982;GO:0016021;GO:0030027;GO:0043005;GO:0016328;GO:0016324;GO:0005887;GO:0005886;GO:0043197;GO:0070062;GO:0098978GO:0016791;GO:0042803;GO:0004725;GO:0005001;GO:0017147	K18035	PTPRO	------	------	COG5599	T:Signal transduction mechanisms
Q86UD1	Out at first protein homolog OS=Homo sapiens OX=9606 GN=OAF PE=2 SV=1	0.3793	-1.399	0.03408	down	yes	227900000	600800000	1.98256e+09	9.18105e+07	1.48524e+09	1662887626	6.49642e+08	2.19939e+08	5.70404e+08	8.69501e+08	7.98557e+07	4.52555e+08	2.79722e+08	5.22202e+08	3.11349e+07	8.93196e+07	1.74191e+07	1.50109e+08	1.08303e+09	8.05356e+08	6.49174e+08	4.56153e+08	4.69095e+08	3.03633e+08	3.88288e+08	5.62839e+08	6.9607e+08	1.24252e+08	1.07553e+08	6.74528e+07	4.39747e+07	2.3582e+07	7.03659e+07	2.97219e+08	4.96501e+07	------	------	------	------	------	------	------	------
A0A024RDB9	NAD(P)(+)--arginine ADP-ribosyltransferase OS=Homo sapiens OX=9606 GN=ART3 PE=3 SV=1	3.808	1.929	0.02503	up	yes	648100000	170200000	7.41951e+06	1.06993e+08	5.34604e+06	6.99129e+08	1.24991e+08	2.30092e+08	1.68692e+08	1.89666e+07	7.36116e+07	9.04669e+06	5.54676e+07	6.79812e+07	6.38681e+07	1.07693e+09	0	4.5446e+07	1.98267e+08	0	2.09836e+08	1.40368e+07	5.78973e+07	2.23153e+08	2.96323e+08	6.32699e+07	7.45704e+08	7.77093e+06	3.91741e+08	5.45641e+07	0	2.75663e+09	2.54085e+08	1.22653e+09	1.10962e+09	BP:protein ADP-ribosylation;BP:peptidyl-arginine ADP-ribosylationCC:extracellular exosome;CC:integral component of membrane;CC:extracellular region;CC:plasma membrane;CC:intrinsic component of plasma membrane;CC:anchored component of membraneMF:NAD+ ADP-ribosyltransferase activity;MF:NA	GO:0006471;GO:0018120GO:0070062;GO:0016021;GO:0005576;GO:0005886;GO:0031226;GO:0031225GO:0003950;GO:0003956	------	------	------	------	------	------
Q7LBR1	Charged multivesicular body protein 1b OS=Homo sapiens OX=9606 GN=CHMP1B PE=1 SV=1	2.701	1.433	0.02342	up	yes	590500000	218600000	1.75273e+07	5.52092e+08	5.39985e+08	2.45497e+07	2.68646e+08	1.60235e+08	2.56915e+07	1.83711e+08	0	2.35719e+08	2.12343e+07	1.60733e+08	1.1567e+08	1.90903e+07	3.05799e+08	2.39848e+08	2.01668e+07	9.48611e+08	5.37472e+07	4.01209e+08	7.79635e+07	5.44992e+08	1.43433e+08	1.94899e+09	0	2.56215e+07	1.36332e+09	0	6.41044e+08	3.2267e+08	4.56398e+08	4.33429e+08	2.51121e+07	BP:viral budding via host ESCRT complex;BP:regulation of centrosome duplication;BP:late endosome to vacuole transport;BP:cell division;BP:mitotic metaphase plate congression;BP:multivesicular body assembly;BP:endosome transport via multivesicular body sorting pathway;BP:establishment of protein localization;BP:ESCRT III complex disassembly;BP:nucleus organization;BP:midbody abscission;BP:vacuolar…	GO:0039702;GO:0010824;GO:0045324;GO:0051301;GO:0007080;GO:0036258;GO:0032509;GO:0045184;GO:1904903;GO:0006997;GO:0061952;GO:0007034;GO:1901673;GO:0015031GO:0010008;GO:0070062;GO:0005771;GO:0031902;GO:0000815;GO:0005829;GO:0030496;GO:0030117;GO:0005634GO:0042802;GO:0019904	K12197	CHMP1, VPS46, DID2	hsa04144	Endocytosis	COG5491	N:Cell motility
A0A384MDU2	Collagen, type I, alpha 2, isoform CRA_c OS=Homo sapiens OX=9606 GN=COL1A2 PE=2 SV=1	0.3151	-1.666	0.01413	down	yes	177200000	562300000	3.01635e+08	1.56924e+08	1.84832e+09	3.02932e+08	1.20982e+09	2.44812e+08	6.27821e+08	9.05744e+08	4.89456e+08	7.6198e+07	4.75178e+08	8.23526e+08	9.65078e+08	5.39551e+07	1.03449e+08	1.7078e+08	2.94047e+08	1.38382e+09	7.99327e+08	2.83158e+08	2.91443e+08	3.63536e+07	2.46181e+08	1.58475e+08	2.17992e+08	1.75512e+08	1.92612e+08	2.96486e+08	2.89203e+08	1.98295e+08	7.84536e+07	5.92025e+07	0	BP:cytokine-mediated signaling pathway;BP:blood coagulation;BP:skeletal system development;BP:leukocyte migration;BP:regulation of blood pressure;BP:collagen metabolic process;BP:bone mineralization;BP:blood vessel development;BP:extracellular matrix organization;BP:platelet activation;BP:skin morphogenesis;BP:cellular response to amino acid stimulus;BP:protein heterotrimerization;BP:Rho protein …	GO:0019221;GO:0007596;GO:0001501;GO:0050900;GO:0008217;GO:0032963;GO:0030282;GO:0001568;GO:0030198;GO:0030168;GO:0043589;GO:0071230;GO:0070208;GO:0007266;GO:0007179;GO:0050776;GO:0042476;GO:0030199;GO:0085029GO:0005788;GO:0031012;GO:0005783;GO:0005584;GO:0070062;GO:0062023;GO:0005615;GO:0005576GO:0005201;GO:0002020;GO:0046872;GO:0042802;GO:0030020;GO:0046332;GO:0030674;GO:0048407	K06236	COL1A	hsa05146;hsa04611;hsa04512;hsa04510;hsa04974;hsa04151;hsa04933	Amoebiasis;Platelet activation;ECM-receptor interaction;Focal adhesion;Protein digestion and absorption;PI3K-Akt signaling pathway;AGE-RAGE signaling pathway in diabetic complications	------	------
B2RDW0	cDNA, FLJ96792, highly similar to Homo sapiens calmodulin 2 (phosphorylase kinase, delta) (CALM2), mRNA OS=Homo sapiens OX=9606 PE=2 SV=1	2.265	1.18	0.03932	up	yes	509200000	224800000	3.41277e+08	2.40038e+08	5.25078e+07	1.19432e+08	1.59526e+08	1.54824e+08	1.40681e+07	6.34599e+07	1.06777e+07	1.82403e+08	8.69894e+06	7.67055e+07	7.58194e+08	1.54421e+08	6.84802e+08	919654867	2.07731e+08	3.63958e+08	1.54756e+07	1.73377e+08	1.97422e+07	3.02556e+08	0	7.09562e+08	1.85849e+07	9.26009e+08	1.41494e+09	5.67242e+08	1.19094e+09	2.11711e+08	2.47682e+07	1.98684e+08	3.60556e+07	BP:calcium-mediated signalingMF:kinase activity;MF:calcium ion binding	GO:0019722GO:0016301;GO:0005509	------	------	------	------	COG5126;COG5126;COG5126	D:Cell cycle control, cell division, chromosome partitioning;Z:Cytoskeleton;T:Signal transduction mechanisms
A0A087X1F1	Mucosal addressin cell adhesion molecule 1 OS=Homo sapiens OX=9606 GN=MADCAM1 PE=1 SV=1	0.1321	-2.92	0.02085	down	yes	82100000	621300000	2.11077e+08	1.35175e+08	2.28515e+08	1.77216e+09	8.23619e+07	9.37625e+08	6.27884e+08	4.07857e+08	3.07383e+07	4.50871e+08	8.86667e+08	1.80656e+08	0	2.50618e+09	3.76716e+06	1.45576e+08	2.16858e+09	7.0906e+08	1.16017e+08	2.71896e+08	5.53483e+08	5.2643e+07	2.81612e+08	1.57574e+07	1.18108e+07	2.548e+07	5.57051e+07	1.57088e+07	6.66199e+07	5.29197e+06	3.02848e+08	0	6.96499e+07	------	------	------	------	------	------	------	------
Q05CP7	FABP1 protein (Fragment) OS=Homo sapiens OX=9606 GN=FABP1 PE=2 SV=1	1.943	0.9583	0.04005	up	yes	459600000	236600000	6.80736e+08	7.1357e+08	2.24042e+08	1.02106e+08	1.80695e+08	1.47063e+08	3.43121e+08	1.90472e+08	1.68042e+07	1.19931e+08	4.20343e+08	3.41662e+07	3.52742e+08	1.4374e+08	1.35807e+08	2.79862e+08	1.36186e+08	1.5187e+08	3.64019e+08	1.26829e+08	1.04968e+08	4.84343e+08	1.34025e+08	2.00697e+08	1.11545e+09	2.43158e+07	3.50791e+08	2.02894e+08	4.46079e+08	1.06149e+08	8.39938e+08	3.14657e+08	1.29624e+09	BP:positive regulation of hydrolase activity;BP:negative regulation of apoptotic process;BP:cellular response to hypoxia;BP:regulation of lipid metabolic process;BP:cellular response to hydrogen peroxide;BP:intestinal absorption;BP:negative regulation of cysteine-type endopeptidase activity involved in apoptotic process;BP:triglyceride catabolic process;BP:positive regulation of fatty acid beta-o…	GO:0051345;GO:0043066;GO:0071456;GO:0019216;GO:0070301;GO:0050892;GO:0043154;GO:0019433;GO:0032000GO:0005782;GO:0070062;GO:0045179;GO:0005654;GO:0032991;GO:0005829GO:0005324;GO:0008144;GO:0005543;GO:0005504;GO:0016209;GO:0032052;GO:0003682	K08750	FABP1, L-FABP	hsa03320;hsa04975	PPAR signaling pathway;Fat digestion and absorption	------	------
B4DLR8	NAD(P)H dehydrogenase [quinone] 1 OS=Homo sapiens OX=9606 GN=NQO1 PE=1 SV=1	10.21	3.352	0.04457	up	yes	624700000	61170000	1.79765e+08	6.35333e+07	2.48119e+08	1.45662e+08	8.13751e+07	5.51597e+07	8.97222e+07	2.35663e+07	1.89196e+07	8.3006e+06	4.62272e+06	7.09746e+07	4.33667e+07	1.74611e+07	2.10638e+07	1.23602e+07	4.50654e+07	6.75891e+07	0	8.96006e+06	1.77316e+07	1.5355e+07	7.11464e+07	7.3996e+07	1.22308e+08	3.73376e+08	2.04285e+09	4.04173e+09	9.89078e+07	2.09894e+08	3.55164e+08	4.33204e+07	4.78498e+07	------	------	------	------	------	------	------	------
P56537	Eukaryotic translation initiation factor 6 OS=Homo sapiens OX=9606 GN=EIF6 PE=1 SV=1	0.4777	-1.066	0.02398	down	yes	221700000	464100000	1.8323e+08	2.48905e+08	5.48389e+08	1.27868e+08	5.96573e+08	1.45454e+08	5.78788e+08	1.07544e+09	0	5.47173e+08	8.94429e+08	4.92086e+08	1.39032e+08	2.25236e+08	2.61424e+08	2.37541e+08	1.76234e+07	8.14175e+08	8.5429e+08	4.44378e+08	8.49535e+08	1.00372e+08	6.26085e+08	4.48289e+08	2.40104e+08	2.02535e+08	2.53311e+08	0	1.18367e+08	8.23529e+07	1.90212e+08	2.05231e+07	1.5702e+08	BP:assembly of large subunit precursor of preribosome;BP:response to insulin;BP:ribosomal large subunit biogenesis;BP:mature ribosome assembly;BP:regulation of glycolytic process;BP:positive regulation of translation;BP:regulation of reactive oxygen species metabolic process;BP:miRNA mediated inhibition of translation;BP:regulation of fatty acid biosynthetic process;BP:gene silencing by miRNA;BP:…	GO:1902626;GO:0032868;GO:0042273;GO:0042256;GO:0006110;GO:0045727;GO:2000377;GO:0035278;GO:0042304;GO:0035195;GO:0045652;GO:0000054GO:0030687;GO:0070062;GO:0005638;GO:0005730;GO:0005634;GO:0005654;GO:0005737;GO:0005829GO:0043023;GO:0043022;GO:0003743	K03264	EIF6	hsa03008	Ribosome biogenesis in eukaryotes	COG1976	J:Translation, ribosomal structure and biogenesis
Q9H0E2	Toll-interacting protein OS=Homo sapiens OX=9606 GN=TOLLIP PE=1 SV=1	1.763	0.818	0.01393	up	yes	423600000	240300000	1.56005e+08	3.05213e+08	2.3623e+08	8.12011e+07	3.85472e+08	2.82002e+08	2.86117e+08	1.41391e+08	1.41978e+07	1.32298e+08	1.41156e+08	1.04693e+08	7.50847e+08	2.28533e+08	2.39183e+08	3.5185e+08	1.27815e+08	1.49873e+08	1.58886e+08	5.0835e+08	2.65472e+08	4.38501e+08	6.40089e+08	2.88562e+08	2.66164e+08	3.04441e+08	3.98576e+08	1.04548e+09	2.70461e+08	3.69176e+08	1.01563e+08	4.22984e+08	5.37227e+08	BP:inflammatory response;BP:phosphorylation;BP:leukocyte activation;BP:signal transduction;BP:interleukin-1-mediated signaling pathway;BP:ubiquitin-dependent protein catabolic process;BP:intracellular signal transduction;BP:autophagy;BP:positive regulation of protein sumoylation;BP:innate immune response;BP:epithelial cell differentiation;BP:cell-cell signaling;BP:protein localization to endosome…	GO:0006954;GO:0016310;GO:0045321;GO:0007165;GO:0070498;GO:0006511;GO:0035556;GO:0006914;GO:0033235;GO:0045087;GO:0030855;GO:0007267;GO:0036010;GO:0043312GO:0045092;GO:0035578;GO:0045323;GO:0005737;GO:0016604;GO:0070062;GO:0005576;GO:0035580;GO:0048471;GO:0005829GO:0032183;GO:0005150;GO:0019900;GO:0035325;GO:0031624;GO:0031625;GO:0043130	K05402	TOLLIP	hsa04620	Toll-like receptor signaling pathway	------	------
Q6LAM1	Heavy chain of factor I (Fragment) OS=Homo sapiens OX=9606 PE=2 SV=1	0.304	-1.718	0.02833	down	yes	150000000	493400000	1.67926e+09	6.91717e+07	1.22187e+09	7.93604e+07	2.20408e+08	7.89807e+07	6.7577e+08	9.77717e+08	1.08317e+08	4.99398e+08	1.23667e+09	2.00638e+08	3.85003e+07	1.61018e+08	3.90831e+07	5.43689e+08	8.75601e+07	8.859e+08	5.95031e+08	1.6466e+08	7.99269e+08	2.08387e+08	3.97663e+08	1.82616e+08	2.63469e+08	3.41505e+07	8.46345e+07	3.49018e+07	5.72625e+07	0	1.33825e+07	7.03145e+07	3.03062e+08	BP:regulation of complement activation;BP:innate immune response;BP:viral process;BP:complement activation, classical pathwayCC:extracellular exosome;CC:membrane;CC:extracellular region;CC:extracellular spaceMF:serine-type endopeptidase activity;MF:scavenger receptor activity;MF:metal ion binding	GO:0030449;GO:0045087;GO:0016032;GO:0006958GO:0070062;GO:0016020;GO:0005576;GO:0005615GO:0004252;GO:0005044;GO:0046872	K01333	CFI	hsa04610;hsa05150	Complement and coagulation cascades;Staphylococcus aureus infection	COG5640	O:Posttranslational modification, protein turnover, chaperones
Q8NBH6	Fibulin-1 OS=Homo sapiens OX=9606 PE=2 SV=1	2.892	1.532	0.0112	up	yes	474000000	163900000	7.38484e+07	5.67841e+07	2.04301e+08	5.36468e+07	1.0607e+08	1.68759e+08	2.06865e+08	5.40603e+08	1.49269e+08	9.77263e+07	5.43895e+07	2.23287e+08	4.02015e+07	2.77772e+08	1.27976e+08	1.27223e+08	2.91808e+08	2.64178e+08	3.71903e+07	1.58621e+08	1.80391e+08	1.71751e+08	1.00571e+08	4.29009e+08	4.13159e+08	8.28667e+07	1.63939e+08	7.6595e+07	2.01542e+08	1.3715e+09	1.15905e+09	1.35072e+09	1.67274e+08	BP:positive regulation of fibroblast proliferation;BP:negative regulation of transformation of host cell by virus;BP:negative regulation of cell adhesion;BP:positive regulation of gene expression;BP:blood coagulation, fibrin clot formation;BP:negative regulation of substrate adhesion-dependent cell spreading;BP:positive regulation of substrate-dependent cell migration, cell attachment to substrat…	GO:0048146;GO:1904188;GO:0007162;GO:0010628;GO:0072378;GO:1900025;GO:1904237;GO:2000647;GO:2001202;GO:0007566;GO:0030198;GO:0016032;GO:2000146;GO:0001933;GO:0070373GO:0031012;GO:0070062;GO:0005576;GO:0071953;GO:0062023;GO:0005615;GO:0005604GO:0005201;GO:0044877;GO:0005509;GO:0042802;GO:0005178;GO:0008022;GO:0070051;GO:0001968;GO:0016504	K17307	FBLN1_2	------	------	------	------
Q6YN16	Hydroxysteroid dehydrogenase-like protein 2 OS=Homo sapiens OX=9606 GN=HSDL2 PE=1 SV=1	1.931	0.9493	0.03255	up	yes	397200000	205700000	3.01935e+08	3.5636e+08	3.93449e+08	7.85362e+07	2.24888e+08	3.19211e+08	1.66849e+07	1.58034e+08	7.23885e+07	1.72147e+08	3.48201e+07	1.45998e+08	3.77717e+08	5.88698e+07	1.5904e+08	2.02939e+08	2.10011e+08	2.93411e+08	1.69928e+08	4.72981e+08	1.01223e+08	1.79004e+08	4.36926e+07	3.03878e+08	1.2425e+08	4.4761e+08	5.84294e+08	1.29325e+09	3.06751e+08	7.43274e+08	1.30293e+08	5.17209e+08	9.32547e+07	CC:membrane;CC:peroxisome;CC:mitochondrionMF:oxidoreductase activity	GO:0016020;GO:0005777;GO:0005739GO:0016491	------	------	------	------	COG1028;COG1028	Q:Secondary metabolites biosynthesis, transport and catabolism;I:Lipid transport and metabolism
P26373	60S ribosomal protein L13 OS=Homo sapiens OX=9606 GN=RPL13 PE=1 SV=4	1.946	0.9605	0.003063	up	yes	396400000	203700000	1.68846e+08	3.36315e+08	1.84493e+08	1.06362e+08	1.75637e+08	1.29929e+08	3.98743e+08	4.58061e+08	1.11222e+08	2.89583e+08	1.89419e+08	3.40797e+08	4.43025e+07	1.62025e+08	1.35381e+08	1.28407e+08	3.48317e+07	1.24531e+08	7.14565e+07	3.75894e+08	3.11519e+08	4.53867e+08	4.7444e+08	1.36288e+08	2.89599e+08	2.7074e+08	1.85163e+08	2.01749e+08	7.31979e+08	2.81585e+08	8.73153e+08	3.72691e+08	4.85895e+08	BP:nuclear-transcribed mRNA catabolic process, nonsense-mediated decay;BP:SRP-dependent cotranslational protein targeting to membrane;BP:translation;BP:viral transcription;BP:translational initiationCC:nucleolus;CC:integral component of membrane;CC:cytosolic ribosome;CC:endoplasmic reticulum;CC:cytosolic large ribosomal subunit;CC:cytosol;CC:membrane;CC:nucleus;CC:ribosomeMF:zinc ion binding;MF:s…	GO:0000184;GO:0006614;GO:0006412;GO:0019083;GO:0006413GO:0005730;GO:0016021;GO:0022626;GO:0005783;GO:0022625;GO:0005829;GO:0016020;GO:0005634;GO:0005840GO:0008270;GO:0003735;GO:0003723;GO:0004222;GO:0005524	K02873	RP-L13e, RPL13	hsa03010	Ribosome	COG4352	J:Translation, ribosomal structure and biogenesis
P0C0L4	Complement C4-A OS=Homo sapiens OX=9606 GN=C4A PE=1 SV=2	3.723	1.896	0.008598	up	yes	458700000	123200000	1.22226e+08	4.30152e+07	8.62759e+07	1.88124e+08	7.1972e+07	1.17727e+08	1.1956e+08	1.07613e+08	8.03868e+08	4.04127e+07	3.91152e+07	7.48948e+07	3.87394e+07	1.19792e+08	4.51536e+07	3.98374e+07	2.71444e+08	6.11794e+07	2.40766e+07	4.3769e+07	1.28546e+08	1.71723e+09	1.69364e+08	9.74451e+07	4.97273e+08	7.05276e+06	1.67769e+08	3.05476e+08	2.69887e+08	1.54482e+08	3.06254e+08	1.19325e+09	6.18978e+08	BP:regulation of complement activation;BP:inflammatory response;BP:detection of molecule of bacterial origin;BP:cellular protein metabolic process;BP:positive regulation of apoptotic cell clearance;BP:post-translational protein modification;BP:innate immune response;BP:opsonization;BP:complement activation;BP:complement activation, classical pathwayCC:endoplasmic reticulum lumen;CC:axon;CC:synaps…	GO:0030449;GO:0006954;GO:0032490;GO:0044267;GO:2000427;GO:0043687;GO:0045087;GO:0008228;GO:0006956;GO:0006958GO:0005788;GO:0030424;GO:0045202;GO:0030054;GO:0005615;GO:0072562;GO:0043025;GO:0030425;GO:0005886;GO:0070062;GO:0044216;GO:0005576GO:0030246;GO:0001849;GO:0001848;GO:0004866	K03989	C4	hsa05133;hsa05322;hsa04610;hsa05150	Pertussis;Systemic lupus erythematosus;Complement and coagulation cascades;Staphylococcus aureus infection	------	------
B4DEQ0	Electron transfer flavoprotein-ubiquinone oxidoreductase OS=Homo sapiens OX=9606 PE=2 SV=1	2.749	1.459	0.04089	up	yes	425500000	154800000	4.03505e+08	2.02481e+08	1.22907e+08	1.55424e+08	1.50497e+08	2.09486e+08	5.00381e+07	7.70073e+07	3.80453e+07	8.75419e+07	1.13397e+07	4.27126e+07	3.70939e+08	1.5545e+07	2.70902e+08	1.46347e+08	1.29663e+08	3.07087e+08	6.81922e+07	3.75882e+08	1.48667e+07	4.64971e+07	2.23613e+07	2.38797e+08	3.42978e+08	3.24032e+08	3.46888e+08	2.12101e+09	2.34273e+08	4.11386e+08	6.29998e+08	3.79e+08	8.29764e+06	BP:fatty acid beta-oxidation using acyl-CoA dehydrogenase;BP:electron transport chain;BP:respiratory electron transport chain;BP:response to oxidative stressCC:mitochondrial membrane;CC:integral component of mitochondrial inner membrane;CC:mitochondrial matrixMF:oxidoreductase activity;MF:electron-transferring-flavoprotein dehydrogenase activity;MF:flavin adenine dinucleotide binding;MF:4 iron, 4…	GO:0033539;GO:0022900;GO:0022904;GO:0006979GO:0031966;GO:0031305;GO:0005759GO:0016491;GO:0004174;GO:0050660;GO:0051539;GO:0043783;GO:0046872;GO:0048039;GO:0048038;GO:0009055	K00311	ETFDH	------	------	COG0644	C:Energy production and conversion
Q6MZQ6	Uncharacterized protein DKFZp686G11190 OS=Homo sapiens OX=9606 GN=DKFZp686G11190 PE=2 SV=1	5.054	2.337	0.001986	up	yes	481500000	95270000	0	4.22407e+07	9.84866e+07	1.8077e+07	4.32255e+07	7.36672e+07	1.82301e+08	9.61216e+07	2.37774e+08	4.95826e+07	1.01662e+08	2.84728e+07	0	3.67896e+08	0	1.15947e+07	2.17355e+07	6.77545e+07	0	5.35644e+07	1.25458e+08	5.40171e+08	3.89143e+08	0	5.44647e+08	0	0	2.23476e+08	1.82006e+08	1.22685e+08	0	1.51796e+09	3.31843e+08	------	------	------	------	------	------	------	------
P51668	Ubiquitin-conjugating enzyme E2 D1 OS=Homo sapiens OX=9606 GN=UBE2D1 PE=1 SV=1	3.84	1.941	0.005734	up	yes	430500000	112100000	0	1.49026e+08	1.99968e+08	5.57551e+07	1.13057e+08	1.47722e+08	5.33454e+07	2.39737e+08	4.59132e+07	3.2689e+07	1.27023e+07	5.95371e+07	1.47897e+08	1.29335e+08	7.94078e+07	9.59488e+07	0	1.04633e+08	7.19469e+07	2.2365e+08	1.67608e+08	6.65705e+08	2.28855e+08	1.14739e+08	1.69882e+08	8.62811e+07	1.4923e+08	3.24731e+08	4.9944e+08	2.77327e+08	0	5.13961e+08	1.70535e+09	BP:BMP signaling pathway;BP:regulation of mitotic cell cycle phase transition;BP:protein K48-linked ubiquitination;BP:protein polyubiquitination;BP:negative regulation of transcription from RNA polymerase II promoter;BP:positive regulation of protein polyubiquitination;BP:positive regulation of protein ubiquitination;BP:TRIF-dependent toll-like receptor signaling pathway;BP:protein deubiquitinati…	GO:0030509;GO:1901990;GO:0070936;GO:0000209;GO:0000122;GO:1902916;GO:0031398;GO:0035666;GO:0016579;GO:0006625;GO:0031145;GO:0002756;GO:0016567;GO:0006511GO:0005737;GO:0005654;GO:0032991;GO:0005829;GO:0000151GO:0005524;GO:0004842;GO:0061631;GO:0031625	K06689	UBE2D, UBC4, UBC5	hsa04141;hsa04120	Protein processing in endoplasmic reticulum;Ubiquitin mediated proteolysis	COG5078	O:Posttranslational modification, protein turnover, chaperones
P20618	Proteasome subunit beta type-1 OS=Homo sapiens OX=9606 GN=PSMB1 PE=1 SV=2	0.5185	-0.9476	0.04588	down	yes	183700000	354300000	1.92394e+08	4.58463e+08	3.13092e+08	5.09926e+08	4.5312e+08	1.5501e+08	3.81821e+08	2.1749e+08	4.2668e+08	2.59654e+08	9.85768e+07	1.23752e+09	1.66525e+08	1.75058e+08	1.7644e+08	6.62314e+08	4.59675e+08	3.76129e+08	5.33205e+07	4.56026e+08	2.10762e+08	2.52271e+07	2.39474e+08	5.34703e+08	1.12496e+08	1.07958e+08	3.64489e+08	8.65156e+07	3.5936e+08	1.47283e+08	8.97366e+07	4.19613e+07	9.53452e+07	BP:positive regulation of canonical Wnt signaling pathway;BP:MAPK cascade;BP:NIK/NF-kappaB signaling;BP:tumor necrosis factor-mediated signaling pathway;BP:neutrophil degranulation;BP:regulation of mitotic cell cycle phase transition;BP:interleukin-1-mediated signaling pathway;BP:regulation of transcription from RNA polymerase II promoter in response to hypoxia;BP:protein polyubiquitination;BP:re…	GO:0090263;GO:0000165;GO:0038061;GO:0033209;GO:0043312;GO:1901990;GO:0070498;GO:0061418;GO:0000209;GO:0043488;GO:0043161;GO:0006521;GO:0002479;GO:1902036;GO:0016579;GO:0002223;GO:0090090;GO:0050852;GO:0043687;GO:0031146;GO:0031145;GO:0060071;GO:0010972;GO:0055085;GO:0051603;GO:0038095;GO:0010498;GO:0010499;GO:0016032GO:0019774;GO:1904813;GO:0005737;GO:0070062;GO:0005654;GO:0034774;GO:0000502;GO:0…	K02732	PSMB1	hsa03050	Proteasome	COG0638	O:Posttranslational modification, protein turnover, chaperones
Q05DB4	HEBP2 protein (Fragment) OS=Homo sapiens OX=9606 GN=HEBP2 PE=2 SV=1	2.516	1.331	0.04378	up	yes	383900000	152600000	2.87993e+07	2.28893e+08	1.2908e+08	1.57528e+08	4.30987e+08	8.16392e+07	3.05303e+08	7.53863e+07	4.46588e+07	1.87991e+08	0	0	1.08056e+08	9.63769e+07	4.11124e+08	1.72669e+07	4.38042e+08	2.9602e+07	3.98482e+07	3.54736e+07	5.40613e+07	1.26996e+08	1.25349e+08	5.72544e+07	2.19326e+08	6.15753e+08	1.73451e+08	1.4684e+09	5.09709e+08	1.02957e+08	1.0131e+09	6.19685e+07	1.32988e+08	BP:negative regulation of mitochondrial membrane potential;BP:neutrophil degranulation;BP:positive regulation of mitochondrial membrane permeability;BP:positive regulation of necrotic cell deathCC:cytoplasm;CC:extracellular exosome;CC:mitochondrion;CC:azurophil granule lumen;CC:extracellular regionMF:heme binding	GO:0010917;GO:0043312;GO:0035794;GO:0010940GO:0005737;GO:0070062;GO:0005739;GO:0035578;GO:0005576GO:0020037	------	------	------	------	------	------
A0A5C2FZ29	IGL c2162_light_IGKV1-39_IGKJ1 (Fragment) OS=Homo sapiens OX=9606 PE=2 SV=1	6.385	2.675	1.5e-05	up	yes	460100000	72060000	0	0	0	6.64387e+07	8.38618e+06	1.19967e+07	1.97922e+08	3.29193e+06	8.08281e+06	5.35333e+06	2.55315e+08	1.28936e+07	0	2.40799e+08	6.74928e+06	1.60737e+08	0	9.09214e+07	3.7106e+06	3.53187e+07	4.49866e+07	6.41275e+08	1.95527e+08	0	7.40741e+08	0	0	8.71892e+08	2.82393e+08	2.89124e+08	4.90281e+08	1.00677e+08	5.2936e+08	------	------	------	------	------	------	------	------
H3BTI0	Cysteine-rich secretory protein LCCL domain-containing 2 OS=Homo sapiens OX=9606 GN=CRISPLD2 PE=1 SV=1	3.196	1.676	0.02211	up	yes	398900000	124800000	0	0	3.48578e+07	3.82948e+07	2.3698e+07	0	2.99146e+08	3.46442e+08	4.55381e+06	0	1.12905e+07	5.81253e+07	8.24548e+06	6.40589e+08	2.13848e+07	2.97932e+07	0	4.07073e+07	0	1.38085e+07	3.01389e+08	3.2734e+08	2.20833e+08	0	5.38204e+08	4.84062e+07	4.34377e+07	4.97142e+08	7.11932e+08	2.22369e+08	3.11262e+07	1317315065	4.29736e+08	BP:lung development;BP:neutrophil degranulation;BP:face morphogenesis;BP:extracellular matrix organizationCC:extracellular exosome;CC:secretory granule lumen;CC:extracellular matrix;CC:ficolin-1-rich granule lumen;CC:extracellular region;CC:transport vesicle;CC:extracellular spaceMF:glycosaminoglycan binding;MF:heparin binding	GO:0030324;GO:0043312;GO:0060325;GO:0030198GO:0070062;GO:0034774;GO:0031012;GO:1904813;GO:0005576;GO:0030133;GO:0005615GO:0005539;GO:0008201	------	------	------	------	COG2340	S:Function unknown
A2J1M8	Rheumatoid factor RF-IP12 (Fragment) OS=Homo sapiens OX=9606 PE=2 SV=1	2.18	1.124	0.04138	up	yes	358600000	164500000	5.27791e+08	9.8034e+07	1.19076e+08	5.38454e+07	0	1.04673e+08	4.78465e+08	0	3.00609e+08	1.30225e+08	2.44646e+08	6.79424e+07	6.28813e+06	3.47162e+08	1.86338e+07	2.8498e+07	4.17485e+07	1.28809e+08	1.24885e+07	1.17723e+08	2.99682e+08	4.10994e+08	2.70308e+08	5.45506e+07	9.70202e+08	9.27161e+06	6.35075e+07	3.93891e+08	1.52818e+08	1.12191e+08	0	5.82888e+08	9.23507e+08	------	------	------	------	------	------	------	------
P00740	Coagulation factor IX OS=Homo sapiens OX=9606 GN=F9 PE=1 SV=2	1.931	0.9493	0.005972	up	yes	337200000	174600000	2.82029e+07	5.29608e+07	3.94072e+08	3.63545e+08	1.2018e+08	2.77471e+08	2.06386e+08	1.5736e+08	2.54161e+07	1.52169e+08	1.21363e+08	7.99137e+07	1.70365e+08	6.91987e+07	1.22187e+08	1.34981e+08	1.64363e+08	1.99517e+08	3.59112e+08	2.96891e+08	1.70914e+08	2.22162e+08	4.73536e+08	4.32382e+08	3.4393e+08	1.49144e+08	1.07818e+08	2.66158e+08	1.87004e+08	3.91551e+08	1.85997e+08	8.81714e+08	4.04704e+08	BP:ER to Golgi vesicle-mediated transport;BP:blood coagulation, intrinsic pathway;BP:blood coagulation;BP:zymogen activation;BP:proteolysisCC:extracellular exosome;CC:extracellular space;CC:endoplasmic reticulum lumen;CC:Golgi lumen;CC:collagen-containing extracellular matrix;CC:plasma membrane;CC:extracellular regionMF:serine-type endopeptidase activity;MF:endopeptidase activity;MF:calcium ion b…	GO:0006888;GO:0007597;GO:0007596;GO:0031638;GO:0006508GO:0070062;GO:0005615;GO:0005788;GO:0005796;GO:0062023;GO:0005886;GO:0005576GO:0004252;GO:0004175;GO:0005509	K01321	F9	hsa04610	Complement and coagulation cascades	COG5640	O:Posttranslational modification, protein turnover, chaperones
A0A5C2FX99	IGL c1589_light_IGKV4-1_IGKJ4 (Fragment) OS=Homo sapiens OX=9606 PE=2 SV=1	2.013	1.009	0.02948	up	yes	333100000	165500000	2.68297e+08	4.70488e+07	2.31523e+07	3.07672e+08	4.10344e+07	1.39648e+08	4.42359e+08	6.0165e+07	9.58415e+07	6.17215e+07	3.51763e+08	3.83075e+08	3.73463e+07	5.32681e+08	1.63898e+07	7.63426e+07	1.08095e+08	4.28098e+07	9.61887e+07	2.79712e+07	3.15723e+08	4.11881e+08	7.48236e+08	2.36452e+08	2.94916e+08	9.0736e+07	5.6055e+07	2.85174e+08	1.24207e+08	9.49519e+08	2.67305e+08	2.71621e+08	2.61222e+08	------	------	------	------	------	------	------	------
A0A0B4J2D5	Glutamine amidotransferase-like class 1 domain-containing protein 3B, mitochondrial OS=Homo sapiens OX=9606 GN=GATD3B PE=1 SV=1	2.157	1.109	0.001887	up	yes	336300000	155900000	3.47094e+08	2.66766e+08	1.56549e+08	1.23168e+08	1.34902e+08	1.26905e+08	9.82758e+06	1.50149e+08	4.67571e+07	1.1739e+08	5.36717e+07	1.39758e+08	2.15314e+08	2.39169e+07	2.767e+08	7.10376e+07	0	3.7602e+08	8.46914e+07	3.45943e+08	5.1957e+07	2.10239e+08	2.81922e+08	5.4198e+08	6.71462e+07	5.09092e+08	4.87951e+08	3.91469e+07	5.21872e+08	2.31428e+08	2.1043e+08	3.66344e+08	5.68065e+08	CC:mitochondrion	GO:0005739	------	------	------	------	COG3155	Q:Secondary metabolites biosynthesis, transport and catabolism
A0A286YFF7	Palmitoyl-protein thioesterase 1 OS=Homo sapiens OX=9606 GN=PPT1 PE=1 SV=1	0.5391	-0.8914	0.04944	down	yes	171500000	318100000	0	8.28332e+07	9.0602e+08	2.45802e+08	7.08586e+08	1.87016e+08	3.20327e+08	3.31507e+08	4.78934e+07	3.25589e+08	1.50458e+08	3.35949e+08	2.45731e+08	1.80923e+08	2.498e+07	2.66838e+08	1.79267e+08	5.34012e+08	3.27195e+08	4.42654e+08	5.1777e+08	9.40458e+07	5.10922e+08	1.94458e+08	2.51629e+07	8.73992e+07	1.60924e+08	6.77426e+07	6.64153e+07	1.21966e+08	3.08979e+08	5.94109e+07	3.6025e+08	BP:negative regulation of cell growth;BP:pinocytosis;BP:protein depalmitoylation;BP:lysosomal lumen acidification;BP:positive regulation of receptor-mediated endocytosis;BP:lipid catabolic process;BP:cofactor metabolic process;BP:cofactor transport;BP:membrane raft organization;BP:grooming behavior;BP:regulation of phospholipase A2 activity;BP:visual perception;BP:associative learning;BP:neurotra…	GO:0030308;GO:0006907;GO:0002084;GO:0007042;GO:0048260;GO:0016042;GO:0051186;GO:0051181;GO:0031579;GO:0007625;GO:0032429;GO:0007601;GO:0008306;GO:0007269;GO:0044257;GO:0008344;GO:0007420;GO:0006898;GO:0048549;GO:0015031;GO:0043524GO:0008021;GO:0045121;GO:0030425;GO:0030424;GO:0005615;GO:0005634;GO:0043025;GO:0005794;GO:0005764GO:0008474;GO:0016290	------	------	------	------	COG1075	R:General function prediction only
P25787	Proteasome subunit alpha type-2 OS=Homo sapiens OX=9606 GN=PSMA2 PE=1 SV=2	0.4668	-1.099	0.01601	down	yes	155400000	332900000	6.4225e+07	5.20384e+08	4.28252e+08	1.79365e+08	8.67811e+08	2.24929e+08	1.34803e+08	3.42405e+08	1.55803e+08	4.65999e+08	5.12136e+07	7.6363e+08	1.36426e+08	3.03019e+08	2.93741e+08	2.9241e+08	4.45967e+08	5.03798e+08	1.37826e+08	4.74622e+08	2.04698e+08	1.48993e+08	1.48738e+08	2.47823e+08	1.47053e+07	1.76731e+08	5.03783e+08	3.42091e+07	2.42686e+08	1.38153e+08	1.00527e+08	8.99801e+07	1.84497e+07	BP:proteasomal protein catabolic process;BP:positive regulation of canonical Wnt signaling pathway;BP:MAPK cascade;BP:NIK/NF-kappaB signaling;BP:tumor necrosis factor-mediated signaling pathway;BP:neutrophil degranulation;BP:regulation of mitotic cell cycle phase transition;BP:interleukin-1-mediated signaling pathway;BP:regulation of transcription from RNA polymerase II promoter in response to hy…	GO:0010498;GO:0090263;GO:0000165;GO:0038061;GO:0033209;GO:0043312;GO:1901990;GO:0070498;GO:0061418;GO:0000209;GO:0043488;GO:0043161;GO:0006521;GO:0002479;GO:1902036;GO:0016579;GO:0002223;GO:0090090;GO:0050852;GO:0043687;GO:0031146;GO:0031145;GO:0060071;GO:0010972;GO:0055085;GO:0038095;GO:0010499;GO:0006511;GO:0009615GO:1904813;GO:0005737;GO:0070062;GO:0005654;GO:0005576;GO:0019773;GO:0034774;GO:0…	K02726	PSMA2	hsa03050	Proteasome	------	------
A0A5C2FWI4	IGL c546_light_IGKV2D-28_IGKJ2 (Fragment) OS=Homo sapiens OX=9606 PE=2 SV=1	2.959	1.565	0.04565	up	yes	355100000	120000000	0	6.02698e+07	1.22982e+07	0	0	1.54493e+07	8.24629e+07	7.94416e+08	0	2.91468e+07	1.60714e+08	0	3.90654e+07	1.80399e+08	1.40375e+07	0	0	7.7125e+07	0	2.98794e+07	6.51943e+07	1.00619e+09	2.05757e+08	0	4.02097e+07	0	1.39411e+08	5.23068e+08	5.00924e+08	4.48963e+08	0	1.61777e+07	3.14891e+08	------	------	------	------	------	------	------	------
P43353	Aldehyde dehydrogenase family 3 member B1 OS=Homo sapiens OX=9606 GN=ALDH3B1 PE=1 SV=1	1.844	0.8828	0.04808	up	yes	303400000	164500000	3.92852e+08	3.34463e+08	2.36321e+08	2.23863e+08	9.2391e+07	2.32148e+08	4.60716e+07	8.5923e+07	0	8.84898e+07	7.29094e+07	7.35495e+07	4.45624e+08	2.74062e+07	1.60111e+08	1.08258e+08	1.37057e+08	2.07756e+08	4.51866e+07	2.54082e+08	2.46633e+07	6.52258e+07	4.58398e+07	4.47339e+08	6.85635e+07	1.353e+08	6.63543e+08	4.95178e+08	2.76134e+08	7.70877e+08	2.25145e+08	1.43758e+08	0	BP:sphingolipid biosynthetic process;BP:aldehyde catabolic process;BP:lipid metabolic process;BP:neutrophil degranulation;BP:alcohol metabolic process;BP:ethanol catabolic process;BP:cellular aldehyde metabolic process;BP:cellular response to oxidative stress;BP:oxidation-reduction processCC:cytoplasm;CC:secretory granule membrane;CC:cytosol;CC:plasma membrane;CC:specific granule membrane;CC:vesi…	GO:0030148;GO:0046185;GO:0006629;GO:0043312;GO:0006066;GO:0006068;GO:0006081;GO:0034599;GO:0055114GO:0005737;GO:0030667;GO:0005829;GO:0005886;GO:0035579;GO:0031982;GO:0070062GO:0004030;GO:0004029;GO:0004028	K00129	E1.2.1.5	hsa00980;hsa00982;hsa05204;hsa00340;hsa00360;hsa00010;hsa00350;hsa00410	Metabolism of xenobiotics by cytochrome P450;Drug metabolism - cytochrome P450;Chemical carcinogenesis;Histidine metabolism;Phenylalanine metabolism;Glycolysis / Gluconeogenesis;Tyrosine metabolism;beta-Alanine metabolism	COG1012	C:Energy production and conversion
P12236	ADP/ATP translocase 3 OS=Homo sapiens OX=9606 GN=SLC25A6 PE=1 SV=4	2.491	1.317	0.01576	up	yes	321900000	129200000	1.40319e+08	2.09865e+08	1.47706e+08	2.5178e+07	1.31841e+08	3.41155e+08	6.93063e+07	7.09497e+07	1.6774e+07	6.15647e+07	0	7.55817e+07	9.6947e+07	3.51463e+06	3.76701e+08	1.47032e+08	1.73224e+08	1.92486e+08	3.78871e+07	2.50866e+08	1.44319e+07	6.37783e+07	1.02686e+07	2.00752e+08	0	2.42645e+08	2.548e+08	1.06255e+09	6.25478e+08	4.42852e+08	3.78122e+08	2.50508e+08	8.61218e+06	BP:apoptotic process;BP:regulation of insulin secretion;BP:active induction of host immune response by virus;BP:protein targeting to mitochondrionCC:integral component of membrane;CC:mitochondrion;CC:mitochondrial inner membrane;CC:mitochondrial inner membrane presequence translocase complex;CC:nucleusMF:transmembrane transporter activity;MF:AT	GO:0006915;GO:0050796;GO:0046732;GO:0006626GO:0016021;GO:0005739;GO:0005743;GO:0005744;GO:0005634GO:0022857;GO:0005471	K05863	SLC25A4S, ANT	hsa04022;hsa04020;hsa05166;hsa05016;hsa05012	cGMP-PKG signaling pathway;Calcium signaling pathway;HTLV-I infection;Huntington's disease;Parkinson's disease	------	------
Q9BYV1	Alanine--glyoxylate aminotransferase 2, mitochondrial OS=Homo sapiens OX=9606 GN=AGXT2 PE=1 SV=1	4.204	2.072	0.04752	up	yes	353100000	83990000	4.9455e+08	1.33898e+08	1.3584e+08	0	7.14275e+07	3.23426e+07	2.554e+07	1.10449e+08	5.43446e+06	4.57718e+06	0	4.02413e+07	0	1.38623e+07	2.00336e+06	8.25285e+07	0	5.46553e+07	6.03298e+06	1.30412e+08	0	7.03968e+06	0	7.12029e+07	0	4.66276e+06	6.37932e+07	1.6551e+08	6.79053e+08	2.64927e+08	1.54468e+09	3.77465e+08	0	BP:positive regulation of nitric oxide biosynthetic process;BP:L-alanine catabolic process, by transamination;BP:glyoxylate catabolic process;BP:glyoxylate metabolic process;BP:glycine biosynthetic process, by transamination of glyoxylateCC:mitochondrion;CC:mitochondrial matrixMF:;MF:alanine-glyoxylate transaminase activity;MF:transaminase activity;MF:pyridoxal phosphate binding	GO:0045429;GO:0019481;GO:0009436;GO:0046487;GO:0019265GO:0005739;GO:0005759GO:0047305;GO:0008453;GO:0008483;GO:0030170	K00827	AGXT2	hsa00260;hsa00250;hsa00280;hsa00270	Glycine, serine and threonine metabolism;Alanine, aspartate and glutamate metabolism;Valine, leucine and isoleucine degradation;Cysteine and methionine metabolism	COG0160	E:Amino acid transport and metabolism
B4DST5	cDNA FLJ58078, highly similar to Tyrosine-protein phosphatase non-receptortype 23 OS=Homo sapiens OX=9606 PE=2 SV=1	3.255	1.703	0.02236	up	yes	332000000	102000000	1.64382e+08	6.68764e+07	9.1797e+07	9.73846e+07	5.03079e+07	8.0664e+06	4.44029e+08	5.99675e+07	7.78656e+06	9.72383e+07	6.92969e+07	2.51429e+08	1.7547e+08	2.84443e+07	1.80013e+07	4.96719e+07	6.35271e+07	5.10901e+07	1.6883e+07	1.3492e+08	1.9548e+08	1.65264e+07	2.11624e+08	2.51242e+08	1.77515e+07	1.40897e+09	1.40574e+08	2.25663e+08	5.57597e+07	5.3988e+08	7.16792e+08	6.70899e+07	0	BP:positive regulation of adherens junction organization;BP:ubiquitin-dependent protein catabolic process via the multivesicular body sorting pathway;BP:positive regulation of Wnt protein secretion;BP:positive regulation of early endosome to late endosome transport;BP:cilium assembly;BP:positive regulation of homophilic cell adhesion;BP:early endosome to late endosome transport;BP:negative regula…	GO:1903393;GO:0043162;GO:0061357;GO:2000643;GO:0060271;GO:1903387;GO:0045022;GO:0010633;GO:0071345;GO:0032456;GO:0015031GO:0005634;GO:0005737;GO:0036064;GO:0016604;GO:0070062;GO:0005654;GO:0005829;GO:0005769;GO:0005768GO:0019901;GO:0004725	K18040	PTPN23	------	------	------	------
A0A5C2FXS1	IGL c1434_light_IGKV1-12_IGKJ1 (Fragment) OS=Homo sapiens OX=9606 PE=2 SV=1	3.496	1.806	0.03969	up	yes	331800000	94910000	0	5.99156e+07	1.73613e+07	0	2.90151e+07	2.49887e+07	1.77653e+08	5.05305e+07	4.21951e+06	3.64608e+07	3.47484e+08	3.00383e+07	0	4.35647e+08	0	4.67193e+06	0	1.56602e+07	2.48859e+07	6.84283e+07	1.91607e+08	1.43012e+08	1.15728e+09	9.88149e+06	6.36886e+08	0	3.71155e+07	5.13496e+08	3.98141e+06	4.14827e+07	6.70035e+07	1.16701e+08	9.23055e+08	------	------	------	------	------	------	------	------
O95372	Acyl-protein thioesterase 2 OS=Homo sapiens OX=9606 GN=LYPLA2 PE=1 SV=1	2.021	1.015	0.02529	up	yes	284300000	140700000	1.14288e+08	3.04482e+08	2.9464e+08	3.09497e+07	2.00127e+08	7.53037e+07	2.73698e+07	9.42091e+07	2.10894e+07	6.67453e+07	8.20418e+06	2.14262e+08	3.24359e+08	3.67787e+07	2.05745e+08	1.19835e+08	2.12419e+08	2.04527e+08	1.33492e+08	2.30832e+08	3.55267e+07	3.43867e+08	2.77195e+07	2.90016e+08	4.62319e+07	3.83668e+08	3.98157e+08	3.11745e+07	7.12934e+08	4.23205e+08	7.71132e+07	6.64132e+08	1.32576e+07	BP:fatty acid metabolic process;BP:protein depalmitoylation;BP:axon guidanceCC:Golgi stack;CC:cytoplasm;CC:extracellular exosome;CC:cytosolMF:carboxylic ester hydrolase activity;MF:cadherin binding;MF:palmitoyl	GO:0006631;GO:0002084;GO:0007411GO:0005795;GO:0005737;GO:0070062;GO:0005829GO:0052689;GO:0045296;GO:0008474	K06130	LYPLA2	hsa00564	Glycerophospholipid metabolism	COG0400	R:General function prediction only
A0A087WUQ6	Glutathione peroxidase OS=Homo sapiens OX=9606 GN=GPX1 PE=1 SV=1	1.725	0.7866	0.02464	up	yes	268200000	155500000	1.51129e+08	2.646e+08	2.41231e+08	4.42773e+07	3.67209e+08	1.78019e+08	1.4197e+08	1.64909e+08	2.02652e+07	1.54987e+08	1.34493e+07	1.29009e+08	1.86184e+08	1.89588e+08	8.80517e+07	8.89907e+07	3.24445e+07	1.16779e+08	8.16453e+07	3.14398e+08	2.9546e+08	3.66249e+08	7.23372e+08	2.38501e+08	3.28107e+08	1.29583e+08	3.74966e+08	1.77059e+08	1.79887e+08	2.87017e+08	3.72842e+07	1.1437e+08	2.62518e+08	BP:negative regulation of extrinsic apoptotic signaling pathway via death domain receptors;BP:interaction with symbiont;BP:negative regulation of release of cytochrome c from mitochondria;BP:regulation of mammary gland epithelial cell proliferation;BP:UV protection;BP:response to xenobiotic stimulus;BP:heart contraction;BP:skeletal muscle tissue regeneration;BP:vasodilation;BP:endothelial cell de…	GO:1902042;GO:0051702;GO:0090201;GO:0033599;GO:0009650;GO:0009410;GO:0060047;GO:0043403;GO:0042311;GO:0001885;GO:0045444;GO:0006195;GO:0051897;GO:0034599;GO:0051450;GO:0010332;GO:0040029;GO:0007605;GO:0006749;GO:0019372;GO:0018158;GO:1902905;GO:1902176;GO:0006641;GO:0048741;GO:0061136;GO:0060055;GO:0002862;GO:0043534;GO:0001659;GO:0045454;GO:0042542;GO:0043154;GO:0042744;GO:0033194;GO:0010269;GO:…	K00432	gpx	hsa00590;hsa00480;hsa04918	Arachidonic acid metabolism;Glutathione metabolism;Thyroid hormone synthesis	COG0386	O:Posttranslational modification, protein turnover, chaperones
A0A5C2G8S9	IGH + IGL c230_heavy_IGHV3-33_IGHD3-10_IGHJ1 (Fragment) OS=Homo sapiens OX=9606 PE=2 SV=1	2.539	1.344	0.03528	up	yes	301600000	118800000	9.30489e+06	1.71829e+08	8.69384e+07	8.34353e+07	3.26344e+07	6.34182e+07	8.58175e+07	1.06018e+08	3.3066e+08	2.20636e+07	2.81661e+08	1.44856e+08	7.35613e+06	2.34172e+08	2.32062e+07	0	0	3.39508e+07	0	2.17494e+08	2.03731e+08	3.49421e+08	1.11452e+09	7.19761e+06	5.65335e+08	0	8.24496e+07	1.87685e+08	1.3243e+08	2.38708e+07	3.83902e+07	4.64894e+08	3.51334e+08	------	------	------	------	------	------	------	------
Q6PI48	Aspartate--tRNA ligase, mitochondrial OS=Homo sapiens OX=9606 GN=DARS2 PE=1 SV=1	8.599	3.104	0.04916	up	yes	376200000	43750000	6.52329e+07	3.26028e+07	2.24572e+07	5.3886e+07	0	2.66316e+07	7.81751e+06	1.48246e+07	0	2.10458e+07	0	1.32433e+07	2.41596e+08	1.11785e+07	4.89921e+07	1.71915e+07	1.43523e+07	5.98188e+07	1.36989e+07	7.92123e+07	0	0	0	1.59935e+07	0	4.39892e+07	3.08069e+07	1.93645e+09	4.6126e+07	2.22642e+08	1.02511e+09	5.39137e+07	1.03459e+07	BP:mitochondrial asparaginyl-tRNA aminoacylation;BP:tRNA aminoacylation;BP:tRNA aminoacylation for protein translationCC:cytoplasm;CC:nucleus;CC:mitochondrion;CC:mitochondrial matrixMF:aminoacyl-tRNA ligase activity;MF:aspartate-tRN;MF:tRNA binding;MF:nucleic acid binding;MF:aspartate-tRNA ligase activity;MF:ATP binding;MF:protein homodimerization activity	GO:0070145;GO:0043039;GO:0006418GO:0005737;GO:0005634;GO:0005739;GO:0005759GO:0004812;GO:0050560;GO:0000049;GO:0003676;GO:0004815;GO:0005524;GO:0042803	K01876	DARS, aspS	hsa00970	Aminoacyl-tRNA biosynthesis	COG0173	J:Translation, ribosomal structure and biogenesis
A0A5C2GSP8	IG c1510_heavy_IGHV3-7_IGHD5-12_IGHJ4 (Fragment) OS=Homo sapiens OX=9606 PE=2 SV=1	3.79	1.922	0.01023	up	yes	332000000	87610000	0	1.16182e+08	4.1431e+07	3.03677e+07	3.28542e+07	4.9854e+07	9.60335e+07	5.92688e+07	1.1871e+08	4.33381e+07	9.80162e+07	4.77654e+07	0	3.66618e+08	0	5.56978e+06	0	6.82211e+07	0	1.21562e+08	1.05985e+08	4.81255e+08	1.02194e+09	7.34694e+06	2.99118e+08	0	6.78752e+07	0	1.66726e+07	1.13657e+08	0	3.54173e+08	6.25922e+08	------	------	------	------	------	------	------	------
F5H265	Polyubiquitin-C (Fragment) OS=Homo sapiens OX=9606 GN=UBC PE=1 SV=1	2.413	1.271	0.02327	up	yes	295600000	122500000	2.33146e+08	5.74065e+07	9.3714e+06	7.38857e+07	3.30977e+08	0	4.97795e+07	2.61989e+07	0	6.21447e+07	1.08383e+07	6.76996e+07	5.63074e+08	9.44372e+06	4.31832e+08	7.36028e+07	2.01795e+07	8.48611e+07	0	2.32165e+07	7.69147e+07	5.93282e+08	6.49832e+07	6.181e+08	1.21331e+07	2.66846e+08	5.17255e+08	0	1.10812e+08	3.65792e+08	4.39574e+08	2.46604e+08	1.56865e+07	BP:modification-dependent protein catabolic process;BP:cellular protein modification process;BP:protein ubiquitination;BP:ubiquitin-dependent protein catabolic processCC:cytoplasm;CC:nucleus;CC:polytene chromosome bandMF:ubiquitin protein ligase binding;MF:protein tag	GO:0019941;GO:0006464;GO:0016567;GO:0006511GO:0005737;GO:0005634;GO:0005704GO:0031625;GO:0031386	K04551;K08770;K02977;K02927	RP-S27Ae, RPS27A;RP-L40e, RPL40;UBB;UBC	hsa04137;hsa03320;hsa03010;hsa05012	Mitophagy - animal;PPAR signaling pathway;Ribosome;Parkinson's disease	------	------
A0A5C2GQ55	IG c1526_heavy_IGHV3-7_IGHD3-3_IGHJ4 (Fragment) OS=Homo sapiens OX=9606 PE=2 SV=1	3.534	1.821	0.000384	up	yes	323600000	91580000	0	1.61005e+08	6.41186e+07	0	2.47871e+07	5.43278e+07	8.91175e+07	6.86554e+07	1.17755e+08	4.15257e+07	1.29533e+08	4.40839e+07	0	3.2633e+08	0	0	8.84016e+07	6.01238e+07	5.0901e+06	1.27104e+08	6.32892e+07	4.68668e+08	6.26986e+08	0	2.80306e+08	0	5.54752e+07	0	0	1.49526e+08	0	2.83726e+08	4.00374e+08	------	------	------	------	------	------	------	------
G3V2B9	Alpha-1-antitrypsin (Fragment) OS=Homo sapiens OX=9606 GN=SERPINA1 PE=1 SV=1	6.649	2.733	0.026	up	yes	359700000	54100000	4.85352e+06	8.7677e+06	4.25308e+07	0	6.08909e+07	1.58229e+08	2.568e+07	3.55373e+07	5.06512e+07	5.77065e+06	1.27716e+07	2.8982e+08	2.00572e+07	7.63775e+07	1.56668e+07	1.48641e+08	0	1.71657e+07	1.62239e+07	1.76716e+07	2.06231e+07	1.96908e+08	6.31914e+07	1.77062e+08	2.29825e+07	7.58261e+07	2.11167e+08	1.42655e+08	1.98303e+09	2.49075e+08	0	6.80845e+08	1.54452e+08	BP:COPII vesicle coating;BP:blood coagulation;BP:cellular protein metabolic process;BP:ER to Golgi vesicle-mediated transport;BP:platelet degranulation;BP:post-translational protein modification;BP:acute-phase response;BP:negative regulation of endopeptidase activity;BP:neutrophil degranulationCC:endoplasmic reticulum;CC:endoplasmic reticulum-Golgi intermediate compartment membrane;CC:endoplasmic…	GO:0048208;GO:0007596;GO:0044267;GO:0006888;GO:0002576;GO:0043687;GO:0006953;GO:0010951;GO:0043312GO:0005783;GO:0033116;GO:0005788;GO:1904813;GO:0030134;GO:0005615;GO:0031093;GO:0005794;GO:0062023;GO:0070062;GO:0043231;GO:0000139;GO:0005576GO:0002020;GO:0042802;GO:0004867	K03984	SERPINA1, AAT	hsa04610	Complement and coagulation cascades	------	------
H0YL69	Proteasome subunit alpha type (Fragment) OS=Homo sapiens OX=9606 GN=PSMA4 PE=1 SV=1	0.3978	-1.33	0.01104	down	yes	113600000	285600000	9.68727e+08	2.71974e+08	3.86482e+08	3.3114e+08	5.66955e+08	2.37451e+08	1.45571e+08	3.58713e+08	0	1.91447e+08	5.70085e+07	3.09633e+08	7.90134e+07	1.65372e+08	2.58444e+08	1.34006e+08	3.34358e+08	4.37718e+08	1.72074e+08	1.73429e+08	1.31584e+08	6.75588e+07	6.96291e+07	1.31034e+08	2.31287e+08	5.39608e+07	3.64069e+08	8.91968e+07	1.20676e+08	1.23569e+08	1.48944e+07	5.19565e+07	4.55588e+07	BP:positive regulation of canonical Wnt signaling pathway;BP:NIK/NF-kappaB signaling;BP:tumor necrosis factor-mediated signaling pathway;BP:regulation of mitotic cell cycle phase transition;BP:interleukin-1-mediated signaling pathway;BP:antigen processing and presentation of exogenous peptide antigen via MHC class I, TAP-dependent;BP:regulation of transcription from RNA polymerase II promoter in …	GO:0090263;GO:0038061;GO:0033209;GO:1901990;GO:0070498;GO:0002479;GO:0061418;GO:0000209;GO:0043488;GO:0043161;GO:0000165;GO:1902036;GO:0016579;GO:0002223;GO:0090090;GO:0050852;GO:0043687;GO:0031146;GO:0031145;GO:0060071;GO:0010972;GO:0055085;GO:0038095;GO:0010498;GO:0010499;GO:0006511;GO:0016032;GO:0006521GO:0019773;GO:0005737;GO:0070062;GO:0005634;GO:0005654;GO:0000932;GO:0000502;GO:0005839;GO:0…	K02728	PSMA4	hsa03050	Proteasome	COG0638	O:Posttranslational modification, protein turnover, chaperones
O75631	Uroplakin-3a OS=Homo sapiens OX=9606 GN=UPK3A PE=1 SV=3	2.939	1.555	0.04924	up	yes	294800000	100300000	1.77422e+08	4.03832e+07	8.85396e+07	0	6.01871e+07	1.05696e+08	2.4557e+08	8.96933e+07	1.33551e+07	2.02664e+07	3.37483e+07	0	1.65332e+07	4.0302e+07	3.97148e+06	4.29718e+08	1.3346e+08	7.94778e+07	1.15214e+07	2.15958e+08	0	4.40791e+07	2.9233e+07	1.70357e+08	1.92146e+07	6.91234e+07	3.65157e+08	2.3469e+08	8.21346e+08	4.39106e+08	1.24122e+09	1.01428e+08	2.0643e+06	BP:urea transport;BP:cell morphogenesis;BP:kidney development;BP:urinary bladder development;BP:water transport;BP:potassium ion homeostasis;BP:epithelial cell differentiation;BP:sodium ion homeostasisCC:endoplasmic reticulum membrane;CC:apical plasma membrane urothelial plaque;CC:extracellular exosome	GO:0015840;GO:0000902;GO:0001822;GO:0060157;GO:0006833;GO:0055075;GO:0030855;GO:0055078GO:0005789;GO:0120001;GO:0070062	K19520	UPK3A, UPIII	hsa05219	Bladder cancer	------	------
O14818	Proteasome subunit alpha type-7 OS=Homo sapiens OX=9606 GN=PSMA7 PE=1 SV=1	0.571	-0.8084	0.02974	down	yes	139200000	243800000	1.91647e+08	3.31207e+08	3.11469e+08	3.63447e+08	5.63109e+08	2.49693e+08	1.17269e+08	3.13822e+08	0	2.4527e+08	5.0497e+07	4.56209e+08	1.27097e+08	1.15407e+08	1.71551e+08	2.50999e+08	2.08379e+08	3.86468e+08	7.99819e+07	2.49475e+08	9.37696e+07	1.01657e+08	1.97103e+07	1.84299e+08	1.42891e+08	1.04726e+08	3.2063e+08	9.57291e+07	1.98544e+08	1.16965e+08	3.50657e+08	1.60875e+07	1.81901e+07	BP:positive regulation of canonical Wnt signaling pathway;BP:NIK/NF-kappaB signaling;BP:tumor necrosis factor-mediated signaling pathway;BP:regulation of mitotic cell cycle phase transition;BP:interleukin-1-mediated signaling pathway;BP:antigen processing and presentation of exogenous peptide antigen via MHC class I, TAP-dependent;BP:regulation of transcription from RNA polymerase II promoter in …	GO:0090263;GO:0038061;GO:0033209;GO:1901990;GO:0070498;GO:0002479;GO:0061418;GO:0000209;GO:0043488;GO:0043161;GO:0000165;GO:1902036;GO:0016579;GO:0002223;GO:0090090;GO:0050852;GO:0043687;GO:0031146;GO:0031145;GO:0060071;GO:0010972;GO:0055085;GO:0038095;GO:0010498;GO:0010499;GO:0006511;GO:0016032;GO:0006521GO:0019773;GO:0005737;GO:0070062;GO:0005634;GO:0005654;GO:0098794;GO:0000502;GO:0005839;GO:0…	K02731	PSMA7	hsa03050	Proteasome	------	------
P08729	Keratin, type II cytoskeletal 7 OS=Homo sapiens OX=9606 GN=KRT7 PE=1 SV=5	0.2966	-1.753	0.02904	down	yes	87260000	294200000	5.73017e+08	7.66409e+08	1.36474e+08	8.89433e+07	1.63951e+08	8.53085e+07	2.43716e+08	7.3515e+08	3.22687e+07	8.72812e+07	3.18026e+08	8.87431e+08	1.70651e+08	1.47098e+08	9.85349e+07	9.97504e+07	1.32566e+08	3.80527e+08	4.61139e+07	9.00128e+08	8.54877e+07	2.4084e+08	2.05319e+08	2.53712e+07	1.19489e+08	1.96798e+07	5.00665e+07	3.71898e+07	0	8.4503e+07	7.34555e+07	1.33289e+07	9.06028e+07	BP:keratinization;BP:cornification;BP:viral processCC:cytoplasm;CC:extracellular exosome;CC:cytosol;CC:keratin filament;CC:intermediate filament;CC:nucleusMF:structural molecule activity	GO:0031424;GO:0070268;GO:0016032GO:0005737;GO:0070062;GO:0005829;GO:0045095;GO:0005882;GO:0005634GO:0005198	K07605	KRT2	------	------	------	------
B5BU25	U2 snRNP auxiliary factor large subunit OS=Homo sapiens OX=9606 GN=U2AF2 PE=2 SV=1	5.159	2.367	0.01441	up	yes	316800000	61410000	0	7.6223e+07	0	0	0	2.62186e+06	0	0	3.39894e+06	4.85864e+07	0	8.79848e+06	1.91833e+07	4.79084e+08	6.74748e+07	0	0	3.90059e+06	1.79146e+07	4.26496e+06	5.5088e+06	0	3.03056e+08	1.89796e+08	3.42523e+08	9.2773e+07	8.97856e+07	0	0	0	7.01601e+08	2.82895e+07	7.86775e+08	BP:negative regulation of mRNA splicing, via spliceosome;BP:negative regulation of protein ubiquitination;BP:RNA export from nucleus;BP:mRNA export from nucleus;BP:positive regulation of RNA splicing;BP:mRNA 3'-end processing;BP:mRNA splicing, via spliceosome;BP:RNA splicing;BP:mRNA processingCC:commitment complex;CC:U2-type prespliceosome;CC:U2AF;CC:nuclear speck;CC:nucleus;CC:nucleoplasm;CC:Prp…	GO:0048025;GO:0031397;GO:0006405;GO:0006406;GO:0033120;GO:0031124;GO:0000398;GO:0008380;GO:0006397GO:0000243;GO:0071004;GO:0089701;GO:0016607;GO:0005634;GO:0005654;GO:0000974;GO:0005681GO:0008187;GO:0030628;GO:0019899;GO:0070742;GO:0003723	K12837	U2AF2	hsa03040	Spliceosome	------	------
Q6IAS0	Tetraspanin OS=Homo sapiens OX=9606 GN=UPK1B PE=2 SV=1	3.05	1.609	0.04916	up	yes	283900000	93080000	5.7673e+07	4.61061e+07	1.07948e+08	1.26372e+07	8.80697e+07	1.4867e+08	1.04944e+07	5.0568e+07	0	1.78094e+07	1.47344e+07	0	3.05666e+07	6.3292e+07	1.00663e+07	5.38034e+08	9.78223e+06	1.59834e+08	5.10967e+07	3.47491e+08	3.72718e+06	2.17438e+07	9.02934e+06	2.11964e+08	0	1.72463e+07	4.57632e+08	2.77049e+08	9.12512e+08	1.02587e+09	5.60432e+07	1.31457e+08	2.72933e+06	BP:response to bacterium;BP:epithelial cell differentiationCC:apical plasma membrane urothelial plaque;CC:integral component of membrane;CC:integral component of plasma membrane;CC:extracellular exosomeMF:structural molecule activity	GO:0009617;GO:0030855GO:0120001;GO:0016021;GO:0005887;GO:0070062GO:0005198	K17347	UPK1	------	------	------	------
A0A0F7NGI8	Leucine rich repeat (In FLII) interacting protein 1, isoform CRA_c OS=Homo sapiens OX=9606 GN=LRRFIP1 PE=2 SV=1	2.661	1.412	0.03353	up	yes	270900000	101800000	0	5.88222e+07	6.16918e+07	7.78438e+07	1.32592e+08	8.2317e+07	1.70958e+08	1.22677e+08	4.0185e+06	8.7112e+07	2.60597e+08	1.5312e+07	2.98956e+07	3.29791e+08	1.43522e+08	4.63564e+07	2.66905e+07	0	2.66142e+07	1.86028e+07	2.39169e+08	6.86039e+08	8.54771e+07	1.89308e+07	6.19563e+07	4.31069e+07	9.65832e+08	5.5165e+08	2.87843e+08	1.05674e+08	8.63135e+06	3.63841e+08	7.17235e+07	BP:positive regulation of NF-kappaB transcription factor activity;BP:negative regulation of transcription from RNA polymerase II promoter;BP:regulation of transcription, DNA-templated;BP:positive regulation of type I interferon production;BP:negative regulation of transcription, DNA-templated;BP:regulation of transcription from RNA polymerase II promoterCC:cytoplasm;CC:cytosol;CC:cytoskeleton;CC:…	GO:0051092;GO:0000122;GO:0006355;GO:0032481;GO:0045892;GO:0006357GO:0005737;GO:0005829;GO:0005856;GO:0005886;GO:0005634GO:0001227;GO:0045296;GO:0003725;GO:0000978;GO:0003677;GO:0000981;GO:0042803	------	------	------	------	------	------
A0A024R5M9	Nuclear mitotic apparatus protein 1, isoform CRA_a OS=Homo sapiens OX=9606 GN=NUMA1 PE=4 SV=1	4.532	2.18	0.007658	up	yes	302000000	66630000	0	1.65005e+08	3.33558e+07	1.99622e+07	1.31068e+07	1.35264e+07	1.16547e+08	1.31907e+08	1.82178e+07	9.06095e+07	1.12256e+08	0	9.17721e+07	1.14432e+08	1.17497e+08	1.04128e+07	0	3.14834e+07	1.97167e+06	3.27474e+07	8.44911e+07	9.73047e+08	7.44223e+08	6.30726e+07	1.83076e+08	2.49849e+08	9.13384e+07	2.43112e+08	4.40853e+07	1.08918e+08	5.93434e+07	1.82369e+07	8.45516e+08	BP:positive regulation of intracellular transport;BP:positive regulation of microtubule polymerization;BP:anastral spindle assembly;BP:positive regulation of chromosome segregation;BP:cell division;BP:astral microtubule organization;BP:meiotic cell cycle;BP:positive regulation of spindle assembly;BP:positive regulation of hair follicle development;BP:regulation of metaphase plate congression;BP:r…	GO:0032388;GO:0031116;GO:0055048;GO:0051984;GO:0051301;GO:0030953;GO:0051321;GO:1905832;GO:0051798;GO:0090235;GO:0060236;GO:0007059;GO:0030513;GO:0006997;GO:1905820;GO:0045618;GO:0000132;GO:1904778;GO:0001578;GO:1902365;GO:1902846GO:0019897;GO:0035371;GO:1905720;GO:0036449;GO:0030425;GO:0031616;GO:0000922;GO:0005737;GO:0005654;GO:0072686;GO:0005813;GO:0005634;GO:0097431;GO:0005876;GO:0099738;GO:0…	K16808	NUMA1	------	------	------	------
Q53GZ8	Complement component 2 variant (Fragment) OS=Homo sapiens OX=9606 PE=2 SV=1	3.268	1.708	0.02889	up	yes	278800000	85300000	0	0	4.18185e+07	3.47707e+07	9.301e+07	4.57863e+07	2.45086e+07	6.29385e+07	8.1665e+08	3.0218e+06	2.26542e+07	4.3389e+07	0	6.30803e+07	1.65441e+07	1.54694e+07	0	6.45512e+07	2.53342e+07	4.58864e+07	3.0671e+07	4.17003e+08	5.06424e+07	2.92647e+06	1.4734e+08	3.99185e+07	8.95505e+07	7.92288e+08	2.69063e+08	2.29732e+08	3.54573e+08	7.50925e+08	2.01213e+08	BP:regulation of complement activation;BP:innate immune response;BP:complement activation;BP:positive regulation of apoptotic cell clearance;BP:complement activation, classical pathway;BP:response to nutrientCC:extracellular exosome;CC:extracellular region;CC:extracellular spaceMF:serine-type endopeptidase activity;MF:metal ion binding	GO:0030449;GO:0045087;GO:0006956;GO:2000427;GO:0006958;GO:0007584GO:0070062;GO:0005576;GO:0005615GO:0004252;GO:0046872	K01332	C2	hsa05133;hsa05322;hsa04610;hsa05150	Pertussis;Systemic lupus erythematosus;Complement and coagulation cascades;Staphylococcus aureus infection	COG5640	O:Posttranslational modification, protein turnover, chaperones
A6NI73	Leukocyte immunoglobulin-like receptor subfamily A member 5 OS=Homo sapiens OX=9606 GN=LILRA5 PE=1 SV=1	0.3787	-1.401	0.01918	down	yes	99440000	262600000	5.74944e+07	1.19155e+07	6.16896e+08	2.16279e+08	5.62842e+08	2.27406e+07	6.06885e+08	2.58164e+08	1.28291e+07	2.32853e+08	3.29033e+08	9.82933e+07	7.17823e+07	3.36583e+08	0	1.41883e+07	0	4.29357e+08	3.84945e+08	2.69158e+08	4.56888e+08	9.64539e+06	3.51747e+08	2.46378e+07	2.69084e+08	7.52304e+07	1.07729e+07	1.91728e+08	5.30249e+06	4.80785e+07	1.37181e+08	1.29938e+07	5.68884e+07	BP:negative regulation of interleukin-12 secretion;BP:positive regulation of inflammatory response;BP:positive regulation of interleukin-6 secretion;BP:positive regulation of calcium ion transport;BP:innate immune response;BP:positive regulation of interleukin-1 beta secretion;BP:positive regulation of MAPK cascade;BP:positive regulation of interleukin-10 secretion;BP:negative regulation of inter…	GO:2001183;GO:0050729;GO:2000778;GO:0051928;GO:0045087;GO:0050718;GO:0043410;GO:2001181;GO:2000666;GO:0061098;GO:1904469;GO:0050867GO:0016021;GO:0005615;GO:0005886;GO:0009986;GO:0005576	K06512	LILR, CD85	hsa04380	Osteoclast differentiation	------	------
Q6SES1	Major prion protein OS=Homo sapiens OX=9606 GN=PRNP PE=3 SV=1	0.3802	-1.395	0.03907	down	yes	99490000	261700000	0	5.08969e+07	6.07169e+08	0	4.35993e+07	2.18391e+07	3.10934e+08	3.19513e+08	9.16327e+07	5.1753e+08	3.13255e+08	6.33054e+07	1.18092e+07	1.68779e+07	7.52584e+06	2.01504e+08	0	6.3811e+08	3.24679e+08	5.18776e+08	6.52168e+08	1.89856e+08	9.18599e+07	1.95061e+08	3.12273e+06	1.42884e+07	7.71009e+07	0	1.88547e+08	2.0321e+07	3.02758e+07	2.07944e+08	7.59888e+07	BP:protein homooligomerizationCC:integral component of membrane;CC:plasma membraneMF:metal ion binding	GO:0051260GO:0016021;GO:0005886GO:0046872	------	------	------	------	------	------
O43263	RNA editing deaminase 1 OS=Homo sapiens OX=9606 GN=hRED1 PE=4 SV=1	1.978	0.984	0.03364	up	yes	234000000	118300000	6.80289e+07	4.80976e+07	5.84507e+07	0	0	5.09963e+07	2.69534e+08	1.36379e+08	1.08137e+08	0	3.63869e+07	4.66903e+07	0	4.03122e+08	0	4.51431e+07	5.12716e+07	3.1489e+08	0	5.39855e+07	8.34085e+07	3.57831e+08	9.62063e+07	0	2.07175e+08	0	0	3.73499e+08	2.56643e+08	1.24345e+08	8.60464e+07	4.407e+08	1.6313e+08	BP:negative regulation of cell migration;BP:positive regulation of viral genome replication;BP:negative regulation of protein kinase activity by regulation of protein phosphorylation;BP:neuromuscular process controlling posture;BP:multicellular organism growth;BP:neuromuscular synaptic transmission;BP:innervation;BP:RNA processing;BP:base conversion or substitution editing;BP:spinal cord ventral …	GO:0030336;GO:0045070;GO:0044387;GO:0050884;GO:0035264;GO:0007274;GO:0060384;GO:0006396;GO:0016553;GO:0021965;GO:0008285;GO:0045087;GO:0061744;GO:0021610;GO:0021618;GO:0051607;GO:0051726;GO:0097049;GO:0006382;GO:0060415;GO:0006397GO:0005737;GO:0005634;GO:0005654;GO:0005730;GO:0005829GO:0008251;GO:0046872;GO:0004000;GO:0003726;GO:0003725;GO:0003723;GO:0003729	K13194	ADARB	------	------	------	------
Q8NFW8	N-acylneuraminate cytidylyltransferase OS=Homo sapiens OX=9606 GN=CMAS PE=1 SV=2	2.986	1.578	0.04538	up	yes	262200000	87800000	1.8786e+07	3.35428e+08	5.12506e+07	1.09621e+08	1.00137e+07	4.67163e+07	1.37863e+08	8.85263e+07	3.90566e+07	5.47975e+07	0	4.94959e+06	1.16532e+07	1.05929e+08	3.00697e+08	3.07175e+07	9.63849e+06	8.0446e+07	0	2.12783e+08	1.92763e+07	2.9176e+08	3.28699e+08	9.06491e+07	4.4591e+07	5.02621e+08	1.19867e+08	1.24001e+09	7.32983e+07	2.07359e+07	3.46493e+08	5.54182e+07	3.18104e+07	BP:N-acetylneuraminate metabolic processCC:membrane;CC:nucleus;CC:nucleoplasmMF:N-acylneuraminate cytidylyltransferase activity	GO:0006054GO:0016020;GO:0005634;GO:0005654GO:0008781	K00983	E2.7.7.43, neuA, CMAS	hsa00520	Amino sugar and nucleotide sugar metabolism	COG1778;COG1083	R:General function prediction only;M:Cell wall/membrane/envelope biogenesis
O95433	Activator of 90 kDa heat shock protein ATPase homolog 1 OS=Homo sapiens OX=9606 GN=AHSA1 PE=1 SV=1	3.472	1.796	0.03541	up	yes	271700000	78260000	1.89341e+07	9.24446e+07	8.73545e+07	9.44826e+07	1.80966e+08	5.14372e+07	5.09995e+07	9.1703e+07	1.09679e+07	6.29074e+07	2.33323e+08	0	1.05366e+08	7.54699e+07	7.68127e+07	2.08492e+07	0	8.06321e+07	2.38808e+07	8.64908e+07	4.18759e+07	3.14085e+08	1.12531e+09	5.62892e+07	1.74514e+08	1.12299e+08	1.10526e+08	1.58167e+07	1.06549e+08	5.30324e+07	0	1.79024e+07	9.02316e+08	BP:positive regulation of ATPase activityCC:endoplasmic reticulum;CC:cytosol;CC:extracellular exosomeMF:chaperone binding;MF:cadherin binding;MF:Hsp90 protein binding;MF:ATPase activator activity	GO:0032781GO:0005783;GO:0005829;GO:0070062GO:0051087;GO:0045296;GO:0051879;GO:0001671	------	------	------	------	COG5580	O:Posttranslational modification, protein turnover, chaperones
P0DP57	Secreted Ly-6/uPAR domain-containing protein 2 OS=Homo sapiens OX=9606 GN=SLURP2 PE=1 SV=1	0.263	-1.927	0.01754	down	yes	71610000	272300000	0	2.25762e+06	3.4343e+07	0	4.48487e+08	2.97373e+07	1.14536e+08	3.80072e+08	0	3.78682e+08	4.96679e+08	4.35956e+08	0	1.08006e+07	0	6.65651e+08	0	4.78519e+08	2.04064e+07	3.46655e+08	2.41062e+08	0	6.44653e+07	4.51902e+08	1.56246e+07	1.34377e+06	8.84092e+07	8.70309e+06	4.9436e+07	2.70799e+06	2.17191e+07	1.18052e+07	0	BP:acetylcholine receptor signaling pathway;BP:regulation of neurotransmitter receptor activityCC:extracellular space;CC:membrane;CC:plasma membrane;CC:anchored component of membraneMF:acetylcholine receptor inhibitor activity;MF:acetylcholine receptor regulator activity;MF:acetylcholine receptor binding	GO:0095500;GO:0099601GO:0005615;GO:0016020;GO:0005886;GO:0031225GO:0030550;GO:0030548;GO:0033130	------	------	------	------	------	------
O00115	Deoxyribonuclease-2-alpha OS=Homo sapiens OX=9606 GN=DNASE2 PE=1 SV=2	0.2436	-2.037	0.03591	down	yes	67260000	276100000	0	6.48441e+07	5.22075e+08	3.0459e+07	5.9453e+08	7.56445e+07	9.63478e+07	1.914e+08	5.66169e+07	8.61131e+07	2.12444e+08	4.78917e+08	0	1.21135e+08	0	1.1866e+09	2.24322e+07	2.3369e+08	2.15129e+08	5.42876e+08	2.38854e+08	5.38707e+07	1.12939e+08	5.38701e+07	1.31253e+08	0	5.96487e+07	1.39839e+07	1.06203e+08	0	1.07339e+08	2.50186e+07	8.46531e+06	BP:regulation of immune response;BP:erythrocyte differentiation;BP:DNA catabolic process, endonucleolytic;BP:apoptotic DNA fragmentation;BP:DNA metabolic processCC:extracellular exosome;CC:lysosomeMF:deoxyribonuclease II activity;MF:DNA binding	GO:0050776;GO:0030218;GO:0000737;GO:0006309;GO:0006259GO:0070062;GO:0005764GO:0004531;GO:0003677	K01158	DNASE2	hsa04142	Lysosome	------	------
Q7Z7H5	Transmembrane emp24 domain-containing protein 4 OS=Homo sapiens OX=9606 GN=TMED4 PE=1 SV=1	2.81	1.491	0.03409	up	yes	252700000	89920000	1.48069e+08	9.02469e+07	3.42367e+07	1.95323e+07	5.64351e+07	1.6623e+08	1.6722e+08	9.67001e+06	3.76075e+06	4.2763e+07	3.20305e+07	4.86795e+07	5.31592e+08	4.73463e+07	1.85921e+08	5.50161e+07	6.32423e+07	8.37467e+07	1.9972e+06	9.20128e+07	8.65516e+06	1.16134e+07	3.42501e+07	1.09475e+08	1.93689e+08	2.06755e+08	1.63118e+08	4.32232e+08	7.1348e+07	6.49968e+08	1.00967e+09	1.42909e+08	7.33009e+06	BP:Golgi organization;BP:ER to Golgi vesicle-mediated transport;BP:intracellular protein transport;BP:positive regulation of I-kappaB kinase/NF-kappaB signalingCC:Golgi apparatus;CC:integral component of membrane;CC:endoplasmic reticulum;CC:endoplasmic reticulum-Golgi intermediate compartment;CC:endoplasmic reticulum membrane;CC:ER to Golgi transport vesicle	GO:0007030;GO:0006888;GO:0006886;GO:0043123GO:0005794;GO:0016021;GO:0005783;GO:0005793;GO:0005789;GO:0030134	K20346	TMED4_9_11	------	------	------	------
A0A5C2GQG7	IG c1636_heavy_IGHV4-34_IGHD3-10_IGHJ6 (Fragment) OS=Homo sapiens OX=9606 PE=2 SV=1	5.789	2.533	0.0184	up	yes	290800000	50230000	0	2.89844e+07	1.5033e+07	1.91237e+08	3.3133e+07	8.77015e+07	0	1.58869e+08	2.29473e+07	5.10384e+07	1.21339e+07	0	0	1.35474e+08	7.32484e+06	1.139e+07	2.36957e+07	2.48909e+07	1.12157e+07	1.98944e+07	1.90067e+07	1.01686e+08	1.46005e+08	3.59382e+06	1.665e+08	9.91382e+06	1.19067e+07	5.66851e+08	4.28025e+08	4.12045e+08	1.39361e+09	1.13699e+08	1.35525e+08	------	------	------	------	------	------	------	------
P19224	UDP-glucuronosyltransferase 1-6 OS=Homo sapiens OX=9606 GN=UGT1A6 PE=1 SV=2	2.945	1.558	0.0442	up	yes	252800000	85850000	1.33172e+08	1.4371e+08	9.97508e+07	3.70149e+07	8.78904e+07	2.43967e+08	1.36065e+07	5.08301e+07	3.97572e+07	5.15584e+06	9.39405e+07	1.24909e+08	1.16412e+08	8.97441e+06	3.08222e+07	5.55433e+07	1.01103e+08	1.86876e+08	7.30139e+06	1.96478e+08	2.55653e+07	5.19117e+07	9.46323e+07	8.30356e+07	1.57593e+08	1.26458e+08	1.21491e+08	1.28112e+09	1.69405e+08	6.07647e+08	6.08104e+07	2.35515e+08	4.44468e+07	BP:negative regulation of fatty acid metabolic process;BP:cellular glucuronidation;BP:flavonoid glucuronidation;BP:xenobiotic glucuronidation;BP:xenobiotic metabolic process;BP:negative regulation of glucuronosyltransferase activity;BP:negative regulation of cellular glucuronidationCC:integral component of membrane;CC:endoplasmic reticulum membrane;CC:endoplasmic reticulum;CC:intracellular membra…	GO:0045922;GO:0052695;GO:0052696;GO:0052697;GO:0006805;GO:1904224;GO:2001030GO:0016021;GO:0005789;GO:0005783;GO:0043231GO:0008194;GO:0019899;GO:0042803;GO:0015020;GO:0046982	K00699	UGT	hsa00980;hsa00860;hsa00982;hsa00830;hsa00983;hsa00140;hsa00053;hsa05204;hsa00040	Metabolism of xenobiotics by cytochrome P450;Porphyrin and chlorophyll metabolism;Drug metabolism - cytochrome P450;Retinol metabolism;Drug metabolism - other enzymes;Steroid hormone biosynthesis;Ascorbate and aldarate metabolism;Chemical carcinogenesis;Pentose and glucuronate interconversions	COG1819;COG1819	G:Carbohydrate transport and metabolism;C:Energy production and conversion
Q5U0A0	Proteasome subunit alpha type OS=Homo sapiens OX=9606 PE=2 SV=1	0.4532	-1.142	0.002127	down	yes	100700000	222200000	6.54449e+07	3.43981e+08	2.90759e+08	2.49435e+08	2.71786e+08	1.79058e+08	6.8179e+07	2.21127e+08	1.30396e+07	3.42338e+08	7.10511e+07	3.23967e+08	3.69763e+08	2.93224e+08	3.10428e+08	1.91841e+08	1.87584e+08	3.54605e+08	1.17285e+08	2.61072e+08	1.39674e+08	1.26261e+08	5.47268e+07	1.61722e+08	0	1.21389e+08	2.51188e+08	2.62255e+07	1.00968e+08	1.06731e+08	5.90087e+07	8.81495e+07	1.08496e+07	BP:proteasome-mediated ubiquitin-dependent protein catabolic process;BP:proteasomal protein catabolic process;BP:proteasomal ubiquitin-independent protein catabolic processCC:cytoplasm;CC:proteasome core complex;CC:nucleus;CC:nucleoplasm;CC:proteasome core complex, alpha-subunit complex;CC:proteasome complex;CC:cytosolMF:endopeptidase activity;MF:threonine-type endopeptidase activity	GO:0043161;GO:0010498;GO:0010499GO:0005737;GO:0005839;GO:0005634;GO:0005654;GO:0019773;GO:0000502;GO:0005829GO:0004175;GO:0004298	K02729	PSMA5	hsa03050	Proteasome	COG0638	O:Posttranslational modification, protein turnover, chaperones
A0A0C4DGZ8	Glycoprotein Ib (Platelet), alpha polypeptide OS=Homo sapiens OX=9606 GN=GP1BA PE=1 SV=1	3.83	1.937	0.03641	up	yes	250700000	65460000	0	1.03144e+08	1.22573e+07	2.11704e+08	1.41518e+07	1.94949e+07	2.71909e+07	0	9.86761e+06	0	1.84686e+08	4.24307e+07	0	1.28463e+08	0	1.85376e+07	1.6612e+07	0	1.11251e+07	0	1.16773e+08	1.61412e+07	5.82497e+08	0	8.19591e+08	1.11879e+07	3.91703e+06	0	2.82626e+08	0	1.32752e+08	0	1.56799e+08	BP:fibrinolysis;BP:cell morphogenesis;BP:blood coagulation, intrinsic pathway;BP:blood coagulation;BP:regulation of blood coagulation;BP:regulation of megakaryocyte differentiation;BP:cell surface receptor signaling pathway;BP:cell adhesion;BP:platelet aggregation;BP:platelet activationCC:membrane;CC:integral component of plasma membrane;CC:anchored component of external side of plasma membrane;C…	GO:0042730;GO:0000902;GO:0007597;GO:0007596;GO:0030193;GO:0045652;GO:0007166;GO:0007155;GO:0070527;GO:0030168GO:0016020;GO:0005887;GO:0031362;GO:0005615;GO:0031012;GO:0016021;GO:0005886;GO:0009986;GO:0070062GO:0015057	------	------	------	------	COG4886	S:Function unknown
Q9Y5X1	Sorting nexin-9 OS=Homo sapiens OX=9606 GN=SNX9 PE=1 SV=1	2.578	1.366	0.03694	up	yes	227700000	88310000	4.22212e+07	2.52073e+08	1.33149e+08	1.53765e+08	1.147e+08	5.09122e+07	2.63738e+07	6.99794e+07	7.12551e+06	1.26485e+07	6.03377e+07	3.97138e+07	1.64445e+08	6.05605e+06	2.44861e+08	2.18063e+07	4.87604e+07	1.14796e+08	2.20996e+07	1.2239e+08	1.46343e+08	3.36768e+07	2.48293e+08	1.21317e+08	5.34393e+07	3.75648e+08	1.71389e+08	4.30173e+08	4.90015e+07	1.13875e+08	1.00995e+09	7.2774e+07	5.24296e+07	BP:cleavage furrow formation;BP:positive regulation of membrane protein ectodomain proteolysis;BP:mitotic cytokinesis;BP:membrane organization;BP:positive regulation of GTPase activity;BP:positive regulation of actin filament polymerization;BP:intracellular protein transport;BP:positive regulation of protein oligomerization;BP:endosomal transport;BP:endocytosis;BP:receptor-mediated endocytosis;BP…	GO:0036089;GO:0051044;GO:0000281;GO:0061024;GO:0043547;GO:0030838;GO:0006886;GO:0032461;GO:0016197;GO:0006897;GO:0006898;GO:0060988;GO:0097320;GO:0045860GO:0005802;GO:0032437;GO:0030136;GO:0005737;GO:0001726;GO:0031410;GO:0030659;GO:0005886;GO:0031234;GO:0070062;GO:0005829GO:0005545;GO:0042802;GO:0042803;GO:0071933;GO:0031625;GO:0035091;GO:0045296	K17923	SNX9_18_33	------	------	------	------
A0A5C2G278	IGL c3269_light_IGLV7-46_IGLJ2 (Fragment) OS=Homo sapiens OX=9606 PE=2 SV=1	2.887	1.53	0.02076	up	yes	228000000	78980000	5.24091e+07	5.84542e+07	1.95022e+07	9.39367e+07	1.35441e+08	3.07428e+07	1.46847e+08	5.32435e+07	7.96626e+07	0	1.44517e+08	2.8676e+07	3.41236e+07	1.47345e+08	0	6.02429e+07	6.17053e+07	6.04817e+07	0	1.00371e+08	1.13927e+08	9.34732e+07	6.49348e+08	2.10742e+07	2.11712e+08	2.50177e+07	4.22452e+07	0	0	0	1.82953e+08	1.58266e+08	6.67477e+08	------	------	------	------	------	------	------	------
Q969Q5	Ras-related protein Rab-24 OS=Homo sapiens OX=9606 GN=RAB24 PE=1 SV=1	2.972	1.571	0.02592	up	yes	228600000	76910000	1.97276e+08	1.15415e+07	7.88781e+06	1.53166e+07	1.28318e+07	3.0241e+07	0	7.15754e+07	2.37254e+07	1.09319e+07	0	0	4.59323e+08	5.17566e+07	1.30672e+08	1.03117e+07	5.84518e+07	1.30713e+08	8.96842e+07	4.47824e+07	2.72742e+07	0	6.04122e+08	8.93769e+07	0	1.17175e+08	9.24348e+07	6.38706e+07	0	2.2244e+08	0	9.00431e+07	5.49084e+08	BP:autophagy;BP:neutrophil degranulation;BP:Rab protein signal transduction;BP:intracellular protein transportCC:secretory granule membrane;CC:cytosol;CC:autophagosome;CC:endocytic vesicle;CC:plasma membrane;CC:endosomeMF:GTPase activity;MF:GTP binding	GO:0006914;GO:0043312;GO:0032482;GO:0006886GO:0030667;GO:0005829;GO:0005776;GO:0030139;GO:0005886;GO:0005768GO:0003924;GO:0005525	K07912	RAB24	------	------	------	------
P49908	Selenoprotein P OS=Homo sapiens OX=9606 GN=SELENOP PE=1 SV=3	3.386	1.76	0.008717	up	yes	234300000	69200000	0	1.62774e+07	2.09747e+08	8.16822e+07	4.60137e+07	5.85147e+07	2.77232e+08	7.07343e+07	2.6269e+07	8.22605e+06	1.39804e+07	1.28474e+08	5.72899e+06	4.81705e+07	5.11404e+07	5.49004e+07	1.11213e+08	4.41777e+07	4.46708e+07	1.21511e+07	7.47517e+07	2.1881e+08	3.96978e+07	4.43564e+07	3.62665e+08	0	2.40336e+07	7.05902e+08	6.13212e+07	9.04968e+07	6.5672e+08	3.04232e+08	6.87853e+07	BP:locomotory behavior;BP:brain development;BP:platelet degranulation;BP:sexual reproduction;BP:response to oxidative stress;BP:post-embryonic development;BP:response to selenium ion;BP:selenium compound metabolic process;BP:regulation of growthCC:extracellular space;CC:extracellular region;CC:platelet dense granule lumen;CC:extracellular exosomeMF:selenium binding	GO:0007626;GO:0007420;GO:0002576;GO:0019953;GO:0006979;GO:0009791;GO:0010269;GO:0001887;GO:0040008GO:0005615;GO:0005576;GO:0031089;GO:0070062GO:0008430	------	------	------	------	------	------
Q5T5C7	Serine--tRNA ligase, cytoplasmic OS=Homo sapiens OX=9606 GN=SARS1 PE=1 SV=1	2.137	1.096	0.04118	up	yes	203800000	95360000	0	2.10686e+08	2.07152e+08	3.3521e+07	2.68617e+08	4.18966e+07	4.66057e+07	8.34902e+07	1.20909e+07	4.81634e+07	6.77264e+07	5.99575e+07	5.72558e+07	4.49423e+07	1.4254e+08	3.28932e+07	1.75121e+08	1.0229e+08	1.61663e+08	9.06381e+07	1.9979e+07	1.7214e+08	8.9908e+07	1.76398e+08	1.11197e+07	3.40857e+08	1.69282e+08	0	3.60457e+07	7.60943e+07	7.05389e+08	6.26935e+07	4.01425e+08	BP:seryl-tRNA aminoacylationCC:cytosolMF:serine-tRNA ligase activity;MF:ATP binding	GO:0006434GO:0005829GO:0004828;GO:0005524	------	------	------	------	COG0172	J:Translation, ribosomal structure and biogenesis
Q92859	Neogenin OS=Homo sapiens OX=9606 GN=NEO1 PE=1 SV=2	0.5554	-0.8484	0.03944	down	yes	104700000	188500000	2.0003e+08	5.81981e+07	2.76648e+08	4.48049e+08	7.82132e+07	1.39102e+08	3.17453e+08	2.49884e+08	2.45203e+07	2.02384e+08	2.70784e+08	2.96407e+08	3.82728e+06	8.20309e+07	2.36849e+08	1.35756e+08	9.27159e+07	1.80408e+08	1.78535e+07	3.53882e+08	2.94349e+08	3.28298e+07	1.47126e+08	2.14593e+08	1.11187e+08	1.26202e+07	2.2186e+08	1.41992e+08	5.35546e+07	1.14001e+08	1.49106e+08	4.53639e+07	1.25487e+07	BP:iron ion homeostasis;BP:cell adhesion;BP:axon guidance;BP:positive regulation of BMP signaling pathwayCC:Golgi apparatus;CC:nucleoplasm;CC:plasma membrane protein complex;CC:integral component of plasma membrane;CC:plasma membraneMF:signaling receptor activity;MF:co-receptor binding	GO:0055072;GO:0007155;GO:0007411;GO:0030513GO:0005794;GO:0005654;GO:0098797;GO:0005887;GO:0005886GO:0038023;GO:0039706	K06766	NEO1	hsa04514	Cell adhesion molecule	------	------
Q8N5N7	39S ribosomal protein L50, mitochondrial OS=Homo sapiens OX=9606 GN=MRPL50 PE=1 SV=2	0.2243	-2.156	0.04622	down	yes	53200000	237200000	5.26002e+07	1.66944e+08	4.75221e+08	2.13902e+08	0	0	0	1.04205e+08	0	2.80531e+08	0	0	4.06591e+07	0	5.33373e+07	0	8.29458e+08	1.16759e+07	4.12591e+08	0	2.05824e+08	8.59684e+07	6.48541e+07	1.44414e+07	0	0	0	1.79142e+07	0	1.58058e+08	3.24708e+07	1.9516e+07	3.23648e+07	BP:mitochondrial translational termination;BP:mitochondrial translational elongationCC:mitochondrial inner membrane;CC:mitochondrion;CC:mitochondrial large ribosomal subunit	GO:0070126;GO:0070125GO:0005743;GO:0005739;GO:0005762	K17431	MRPL50	------	------	------	------
Q8IZZ5	Coagulation factor XII-Mie OS=Homo sapiens OX=9606 PE=2 SV=1	2.573	1.363	0.01196	up	yes	208700000	81120000	3.05063e+07	0	1.17534e+08	0	6.95607e+07	5.15402e+07	9.76063e+07	1.60411e+08	7.52667e+07	4.29908e+07	1.35572e+08	1.22412e+08	3.47175e+07	2.25089e+08	3.36212e+07	9.43328e+07	8.04138e+06	3.99791e+07	1.15435e+07	4.60292e+07	1.44564e+08	1.39524e+08	6.89164e+07	1.02948e+08	5.62523e+08	4.57333e+07	3.36363e+07	1.39227e+08	5.75889e+08	1.3314e+08	4.11124e+07	3.55957e+08	3.05436e+08	BP:Factor XII activation;BP:blood coagulation, intrinsic pathway;BP:blood coagulation;BP:zymogen activation;BP:proteolysis;BP:positive regulation of fibrinolysis;BP:innate immune response;BP:protein processing;BP:fibrinolysis;BP:protein autoprocessing;BP:plasma kallikrein-kinin cascade;BP:positive regulation of plasminogen activation;BP:response to misfolded protein;BP:positive regulation of bloo…	GO:0002542;GO:0007597;GO:0007596;GO:0031638;GO:0006508;GO:0051919;GO:0045087;GO:0016485;GO:0042730;GO:0016540;GO:0002353;GO:0010756;GO:0051788;GO:0030194GO:0005615;GO:0005791;GO:0062023;GO:0005886;GO:0070062;GO:0005576GO:0004252;GO:0005509;GO:0051787	K01328	F12	hsa04610	Complement and coagulation cascades	COG5640	O:Posttranslational modification, protein turnover, chaperones
A0A5C2GF48	IG c1070_heavy_IGHV3-74_IGHD2-15_IGHJ2 (Fragment) OS=Homo sapiens OX=9606 PE=2 SV=1	4.872	2.285	0.01281	up	yes	238600000	48970000	0	4.58758e+07	2.71478e+07	0	2.0654e+07	1.81925e+07	3.85663e+07	3.56037e+07	8.31213e+07	2.05894e+07	6.56983e+07	2.78533e+07	0	1.77207e+08	0	0	0	3.52873e+07	0	4.91575e+07	4.06368e+07	4.46025e+08	2.69586e+08	0	8.92112e+07	0	1.3959e+07	1.30859e+07	2.57192e+07	5.32793e+07	0	6.44693e+08	5.91697e+08	------	------	------	------	------	------	------	------
P28074	Proteasome subunit beta type-5 OS=Homo sapiens OX=9606 GN=PSMB5 PE=1 SV=3	0.5034	-0.9902	0.04275	down	yes	95200000	189100000	4.84689e+07	1.07908e+08	2.87741e+08	3.06851e+08	4.99685e+08	1.57151e+08	5.98161e+07	4.50179e+08	5.48048e+07	4.55826e+07	1.51575e+08	1.78415e+08	3.84053e+07	2.77682e+08	2.33615e+08	1.97435e+08	6.73776e+07	4.11313e+08	8.25582e+07	2.17118e+08	9.66425e+07	1.08761e+08	4.70155e+07	1.16315e+08	0	7.48911e+07	2.45052e+08	6.10996e+07	1.55696e+08	4.98372e+07	5.48023e+07	5.68745e+07	7.68764e+07	BP:positive regulation of canonical Wnt signaling pathway;BP:antigen processing and presentation of exogenous peptide antigen via MHC class I, TAP-dependent;BP:NIK/NF-kappaB signaling;BP:tumor necrosis factor-mediated signaling pathway;BP:regulation of mitotic cell cycle phase transition;BP:interleukin-1-mediated signaling pathway;BP:regulation of transcription from RNA polymerase II promoter in …	GO:0090263;GO:0002479;GO:0038061;GO:0033209;GO:1901990;GO:0070498;GO:0061418;GO:0000209;GO:0043488;GO:0043161;GO:0006521;GO:0000165;GO:0055085;GO:1902036;GO:0006508;GO:0016579;GO:0002223;GO:0090090;GO:0050852;GO:0043687;GO:0031146;GO:0031145;GO:0060071;GO:0010972;GO:0006979;GO:0038095;GO:0010498;GO:0010499;GO:0016032GO:0019774;GO:0005737;GO:0070062;GO:0005654;GO:0000502;GO:0005839;GO:0005829;GO:0…	K02737	PSMB5	hsa03050	Proteasome	------	------
Q562L9	Actin-like protein (Fragment) OS=Homo sapiens OX=9606 GN=ACT PE=4 SV=1	2.59	1.373	0.04874	up	yes	204100000	78790000	0	1.54342e+08	1.54894e+08	3.13905e+07	4.63151e+07	8.01496e+07	3.98049e+07	3.87072e+07	0	8.36154e+07	0	5.43167e+07	8.76264e+07	3.16093e+07	7.52644e+07	5.27244e+07	1.73292e+08	9.65626e+07	1.86721e+07	1.4916e+08	4.97761e+07	4.0712e+07	7.27092e+07	9.65696e+07	8.29996e+07	6.5752e+07	8.29997e+07	9.0817e+07	8.6521e+08	2.00372e+08	5.29519e+08	1.58733e+07	3.05978e+08	BP:cellular response to cytochalasin B;BP:membrane organization;BP:substantia nigra development;BP:synaptic vesicle endocytosis;BP:negative regulation of protein binding;BP:ATP-dependent chromatin remodeling;BP:positive regulation of gene expression, epigenetic;BP:protein deubiquitination;BP:regulation of protein localization to plasma membrane;BP:axonogenesis;BP:ephrin receptor signaling pathway…	GO:0072749;GO:0061024;GO:0021762;GO:0048488;GO:0032091;GO:0043044;GO:0045815;GO:0016579;GO:1903076;GO:0007409;GO:0048013;GO:0001895;GO:0034329;GO:0038096;GO:0051621;GO:0048870;GO:0022898;GO:0000079;GO:0051623;GO:0098974;GO:0070527GO:0005829;GO:0015629;GO:0016020;GO:0036464;GO:0045202;GO:0005925;GO:0005737;GO:0070062;GO:0005634;GO:0097433;GO:0072562;GO:0098871;GO:0005654;GO:0030424;GO:0005856;GO:0…	K05692	ACTB_G1	hsa05132;hsa05131;hsa05130;hsa04611;hsa04530;hsa04670;hsa04145;hsa04510;hsa05410;hsa05412;hsa05414;hsa04921;hsa05416;hsa05164;hsa04210;hsa05100;hsa05205;hsa04015;hsa04520;hsa04390;hsa04919;hsa04810;hsa05418;hsa05110	Salmonella infection;Shigellosis;Pathogenic Escherichia coli infection;Platelet activation;Tight junction;Leukocyte transendothelial migration;Phagosome;Focal adhesion;Hypertrophic cardiomyopath;Arrhythmogenic right ventricular cardiomyopath;Dilated cardiomyopathy;Oxytocin signaling pathway;Viral myocarditis;Influenza A;Apoptosis;Bacterial invasion of epithelial cells;Proteoglycans in cancer;Rap1…	------	------
Q13938	Calcyphosin OS=Homo sapiens OX=9606 GN=CAPS PE=1 SV=2	2.516	1.331	0.02396	up	yes	202200000	80370000	7.03986e+06	5.57253e+07	9.26234e+07	1.29041e+08	2.86653e+08	1.65663e+07	0	3.49851e+07	0	2.95573e+07	4.737e+07	1.1031e+08	0	1.77352e+07	2.00648e+07	1.16375e+08	3.65345e+06	1.40443e+08	2.48067e+07	2.58594e+08	5.50969e+07	3.7943e+07	2.61284e+07	3.21748e+08	0	3.6692e+07	3.84494e+08	5.37216e+08	3.02735e+08	6.31271e+07	2.92119e+08	1.98829e+07	0	BP:intracellular signal transductionCC:cytoplasm;CC:vesicleMF:calcium ion binding	GO:0035556GO:0005737;GO:0031982GO:0005509	------	------	------	------	------	------
P20138	Myeloid cell surface antigen CD33 OS=Homo sapiens OX=9606 GN=CD33 PE=1 SV=2	0.4466	-1.163	0.04499	down	yes	86650000	194000000	4.40681e+07	6.21258e+07	2.72123e+08	2.98511e+07	0	3.70075e+07	1.5156e+08	1.59223e+08	1.95239e+07	4.90667e+08	4.67861e+08	1.69625e+08	1.30437e+08	3.80754e+08	1.54115e+08	2.65008e+07	8.22249e+07	3.67871e+08	1.37727e+08	1.43454e+08	5.53429e+08	9.36853e+07	2.67726e+08	1.21388e+07	8.2823e+07	3.94015e+07	8.11735e+07	1.35682e+08	2.41254e+07	1.03757e+08	8.71386e+07	2.08916e+07	9.12931e+07	BP:negative regulation of cell proliferation;BP:cell adhesion;BP:signal transduction;BP:positive regulation of protein tyrosine phosphatase activity;BP:negative regulation of monocyte activation;BP:immune response-inhibiting signal transduction;BP:negative regulation of interleukin-1 beta production;BP:negative regulation of tumor necrosis factor production;BP:cell-cell adhesion;BP:cell-cell sign…	GO:0008285;GO:0007155;GO:0007165;GO:1903615;GO:0150102;GO:0002765;GO:0032691;GO:0032720;GO:0098609;GO:0007267;GO:0050776;GO:0050714;GO:0051926;GO:0043312;GO:0032717GO:0009897;GO:0035579;GO:0070821;GO:0005634;GO:0005777;GO:0005794;GO:0009986;GO:0005887;GO:0005886;GO:0016021GO:0038023;GO:0030246;GO:0019903;GO:0033691	K06473	CD33, SIGLEC3	hsa04640	Hematopoietic cell lineage	------	------
B3KW34	Protein YIPF OS=Homo sapiens OX=9606 PE=2 SV=1	2.705	1.436	0.03653	up	yes	198200000	73260000	3.28233e+07	2.61736e+07	3.20255e+06	1.27028e+07	1.97499e+07	1.91569e+07	1.43554e+08	4.28649e+08	0	3.77015e+07	0	2.6715e+07	1.03779e+08	1.78251e+08	3.44494e+07	4.14853e+07	0	0	1.82291e+06	1.82488e+07	1.16977e+08	3.96344e+08	6.32306e+08	8.31282e+07	2.77847e+08	5.52155e+07	2.04009e+07	2.29354e+08	3.75568e+07	2.18077e+08	1.14263e+07	1.65614e+07	4.00524e+08	BP:regulation of ER to Golgi vesicle-mediated transport;BP:protein transport;BP:vesicle-mediated transportCC:endoplasmic reticulum exit site;CC:endoplasmic reticulum;CC:Golgi apparatus;CC:integral component of membrane;CC:endoplasmic reticulum membrane;CC:nucleoplasm;CC:nuclear outer membrane-endoplasmic reticulum membrane network;CC:intracellular membrane-bounded organelle;CC:ER to Golgi transpo…	GO:0060628;GO:0015031;GO:0016192GO:0070971;GO:0005783;GO:0005794;GO:0016021;GO:0005789;GO:0005654;GO:0042175;GO:0043231;GO:0030134	K20363	YIP1, YIPF5	------	------	COG5080	U:Intracellular trafficking, secretion, and vesicular transport
Q9NWV4	CXXC motif containing zinc binding protein OS=Homo sapiens OX=9606 GN=CZIB PE=1 SV=1	2.407	1.267	0.01309	up	yes	186600000	77520000	1.43761e+08	3.93925e+08	4.27826e+07	2.18541e+07	1.02471e+08	2.35159e+07	0	1.29055e+07	2.80985e+07	0	3.6339e+06	1.02696e+08	1.19582e+08	1.14895e+08	7.16203e+07	1.32541e+07	3.35568e+07	3.91418e+07	0	8.05677e+07	4.71413e+07	7.19148e+07	3.76104e+08	4.51875e+07	8.56369e+07	1.307e+08	3.01583e+08	0	1.18077e+08	4.87861e+07	3.77974e+08	1.75634e+08	3.21046e+08	MF:zinc ion binding	GO:0008270	------	------	------	------	------	------
P27169	Serum paraoxonase/arylesterase 1 OS=Homo sapiens OX=9606 GN=PON1 PE=1 SV=3	3.463	1.792	0.004579	up	yes	202700000	58540000	5.85858e+07	2.52496e+07	7.44061e+07	1.33408e+07	3.99176e+07	1.41774e+07	1.13144e+08	7.2015e+07	1.42797e+08	4.03894e+07	6.98536e+06	3.96462e+07	1.64769e+08	1.14682e+08	5.29965e+07	5.18947e+06	1.73441e+08	2.86479e+07	1.91071e+07	3.81219e+06	2.60144e+07	4.13188e+08	1.00063e+07	1.92179e+07	3.08984e+07	3.48151e+07	2.95764e+07	3.59311e+08	2.70198e+08	6.36944e+08	8.2875e+07	3.86258e+08	1.59325e+08	BP:positive regulation of transporter activity;BP:organophosphate catabolic process;BP:response to toxic substance;BP:positive regulation of cholesterol efflux;BP:lipoxygenase pathway;BP:response to fluoride;BP:cholesterol metabolic process;BP:carboxylic acid catabolic process;BP:positive regulation of binding;BP:response to nutrient levels;BP:phosphatidylcholine metabolic process;BP:aromatic com…	GO:0032411;GO:0046434;GO:0009636;GO:0010875;GO:0019372;GO:1902617;GO:0008203;GO:0046395;GO:0051099;GO:0031667;GO:0046470;GO:0019439;GO:0070542GO:0070062;GO:0005615;GO:0072562;GO:0034364;GO:0034366;GO:0043231;GO:0005576GO:0004064;GO:0005543;GO:0005509;GO:0102007;GO:0042803;GO:0004063	K01045	PON	------	------	------	------
Q8NE62	Choline dehydrogenase, mitochondrial OS=Homo sapiens OX=9606 GN=CHDH PE=1 SV=2	5.313	2.41	0.02226	up	yes	210500000	39620000	6.1938e+07	4.21986e+07	4.93811e+07	0	6.79875e+07	7.41255e+07	4.90789e+07	1.4291e+07	2.65825e+07	4.71848e+06	1.92929e+07	1.20169e+07	2.05865e+07	1.72026e+07	1.90246e+07	7.5855e+06	1.45951e+07	7.39091e+07	4.99098e+07	1.49827e+08	1.81607e+07	1.71856e+07	2.54956e+07	6.55436e+07	5.26298e+07	4.09089e+07	1.64464e+08	1.02335e+09	1.88533e+08	6.45455e+07	6.06228e+08	6.70594e+07	0	BP:choline catabolic process;BP:glycine betaine biosynthetic process from cholineCC:mitochondrial inner membraneMF:flavin adenine dinucleotide binding;MF:oxidoreductase activity, acting on CH-OH group of donors;MF:choline dehydrogenase activity	GO:0042426;GO:0019285GO:0005743GO:0050660;GO:0016614;GO:0008812	K00108	betA, CHDH	hsa00260	Glycine, serine and threonine metabolism	COG2303	E:Amino acid transport and metabolism
A0A5C2FYD6	IGL c1240_light_IGLV2-14_IGLJ2 (Fragment) OS=Homo sapiens OX=9606 PE=2 SV=1	2.555	1.353	0.02862	up	yes	179100000	70110000	9.79244e+07	3.60519e+07	1.02807e+07	1.79669e+07	3.4658e+07	3.47219e+07	1.75962e+08	0	1.99346e+08	0	1.96275e+07	1.13492e+08	1.552e+07	3.85874e+08	8.82339e+06	0	3.07112e+07	9.76116e+06	7.16308e+06	2.16754e+07	4.23919e+07	3.64654e+08	2.85349e+08	0	2.91508e+08	1.04273e+07	3.94395e+07	0	3.30829e+07	0	0	2.19106e+08	1.89145e+08	------	------	------	------	------	------	------	------
A0A5C2GQ05	IG c1476_heavy_IGHV3-7_IGHD4-11_IGHJ4 (Fragment) OS=Homo sapiens OX=9606 PE=2 SV=1	2.779	1.475	0.003963	up	yes	179700000	64660000	1.48284e+07	1.30723e+08	1.52373e+07	0	0	5.57575e+07	1.37824e+08	1.00791e+08	2.20177e+07	5.03676e+07	4.97197e+07	2.93234e+07	1.62076e+07	1.37315e+08	1.10278e+07	1.47401e+07	4.8691e+07	1.16239e+08	3.57358e+07	3.53157e+07	2.06716e+08	2.89189e+08	3.40594e+08	0	9.43442e+07	1.53647e+06	3.04605e+07	1.90418e+08	1.05211e+08	8.43705e+07	0	4.28174e+08	2.32358e+08	------	------	------	------	------	------	------	------
A0A5C2GL83	IG c76_heavy_IGHV6-1_IGHD1-1_IGHJ3 (Fragment) OS=Homo sapiens OX=9606 PE=2 SV=1	2.932	1.552	0.003826	up	yes	179700000	61280000	2.22474e+07	6.08905e+07	6.92373e+07	2.87151e+07	4.33487e+07	2.85498e+07	1.51506e+08	7.58598e+07	6.96209e+06	1.02625e+08	3.30375e+07	2.77371e+07	7.52079e+06	1.80781e+08	0	2.24399e+07	0	8.83978e+07	6.12915e+07	2.6714e+07	1.26463e+08	4.39829e+08	1.38539e+08	0	2.99305e+08	0	2.5939e+07	0	1.45619e+08	4.09414e+06	0	2.65937e+08	1.18642e+08	------	------	------	------	------	------	------	------
Q02338	D-beta-hydroxybutyrate dehydrogenase, mitochondrial OS=Homo sapiens OX=9606 GN=BDH1 PE=1 SV=3	2.515	1.331	0.04549	up	yes	166900000	66350000	2.11071e+08	6.05483e+07	5.71004e+07	5.22693e+07	5.25565e+07	1.47864e+08	6.8496e+07	1.84832e+07	1.30859e+07	3.25948e+07	6.04436e+06	2.08279e+07	1.64148e+08	1.5973e+07	7.0752e+07	2.98007e+07	1.62499e+08	8.8857e+07	2.93414e+07	7.96885e+07	1.13126e+07	1.67805e+07	7.81825e+06	1.8707e+08	2.26909e+07	1.64876e+08	2.33639e+08	7.55612e+08	3.31489e+07	3.05456e+08	1.30779e+08	1.32596e+08	1.25905e+07	BP:ketone body biosynthetic process;BP:ketone body catabolic processCC:mitochondrion;CC:nucleoplasm;CC:mitochondrial matrix;CC:matrix side of mitochondrial inner membraneMF:3-hydroxybutyrate dehydrogenase activity;MF:oxidoreductase activity	GO:0046951;GO:0046952GO:0005739;GO:0005654;GO:0005759;GO:0099617GO:0003858;GO:0016491	K00019	E1.1.1.30, bdh	hsa00650;hsa00072	Butanoate metabolism;Synthesis and degradation of ketone bodies	------	------
A0A5C2G887	IGL c3835_light_IGLV3-25_IGLJ2 (Fragment) OS=Homo sapiens OX=9606 PE=2 SV=1	3.996	1.999	0.005441	up	yes	182000000	45550000	0	1.08741e+07	9.14342e+06	0	9.32419e+06	7.41469e+07	2.0826e+07	1.96732e+07	1.49488e+08	7.09263e+07	6.64476e+07	1.11648e+07	0	1.82233e+08	0	3.56091e+07	4.90941e+06	6.91934e+06	7.0038e+06	3.27038e+06	9.23634e+07	2.19115e+08	3.48801e+08	8.60935e+06	2.20844e+08	0	5.15868e+07	0	2.08081e+07	0	0	1.02626e+08	4.83761e+08	------	------	------	------	------	------	------	------
P13671	Complement component C6 OS=Homo sapiens OX=9606 GN=C6 PE=1 SV=3	3.067	1.617	0.002368	up	yes	168900000	55070000	3.00435e+07	5.58885e+06	7.76552e+07	1.02643e+08	5.9455e+06	2.71531e+07	6.53681e+07	2.01877e+08	7.32744e+07	1.97527e+07	5.55088e+06	5.21449e+07	3.19441e+06	1.17056e+08	3.04016e+07	1.09367e+07	1.54756e+08	5.68422e+07	2.44864e+07	4.36404e+07	4.8125e+07	2.63446e+08	5.15781e+07	2.71991e+07	1.26204e+08	1.08268e+07	4.70438e+07	2.67443e+08	3.15221e+08	9.2608e+07	3.02917e+08	4.4621e+08	7.5957e+07	BP:cytolysis;BP:in utero embryonic development;BP:regulation of complement activation;BP:innate immune response;BP:positive regulation of angiogenesis;BP:complement activation;BP:positive regulation of activation of membrane attack complex;BP:complement activation, classical pathwayCC:extracellular exosome;CC:extracellular region;CC:membrane attack complex	GO:0019835;GO:0001701;GO:0030449;GO:0045087;GO:0045766;GO:0006956;GO:0001970;GO:0006958GO:0070062;GO:0005576;GO:0005579	K03995	C6	hsa05322;hsa04610;hsa05020	Systemic lupus erythematosus;Complement and coagulation cascades;Prion diseases	------	------
F5H8H2	Mevalonate kinase OS=Homo sapiens OX=9606 GN=MVK PE=1 SV=1	1.89	0.9184	0.02995	up	yes	143900000	76150000	5.41329e+07	1.58704e+08	1.07628e+08	8.86952e+07	5.27527e+07	8.2677e+07	2.07149e+07	6.50496e+07	0	5.20716e+07	1.26906e+07	2.87145e+07	9.92144e+07	2.98277e+06	2.50948e+08	0	0	1.26742e+08	2.53504e+07	1.30419e+08	1.12327e+07	4.42157e+07	0	1.4876e+08	0	2.81833e+08	2.35969e+08	0	1.18143e+08	1.26108e+08	1.42648e+08	5.3322e+07	0	BP:negative regulation of inflammatory response;BP:isoprenoid biosynthetic process;BP:cholesterol biosynthetic process;BP:regulation of cholesterol biosynthetic process;BP:isopentenyl diphosphate biosynthetic process, mevalonate pathwayCC:cytoplasm;CC:cytosol;CC:peroxisomeMF:mevalonate kinase activity;MF:magnesium ion binding;MF:ATP binding;MF:identical protein binding	GO:0050728;GO:0008299;GO:0006695;GO:0045540;GO:0019287GO:0005737;GO:0005829;GO:0005777GO:0004496;GO:0000287;GO:0005524;GO:0042802	------	------	------	------	COG1577	I:Lipid transport and metabolism
Q86T13	C-type lectin domain family 14 member A OS=Homo sapiens OX=9606 GN=CLEC14A PE=1 SV=1	0.2947	-1.763	0.002609	down	yes	49300000	167300000	8.85615e+07	4.72513e+06	6.72027e+07	0	1.3989e+08	3.67073e+07	2.69296e+08	3.46492e+08	0	1.6335e+08	8.07856e+07	2.4515e+08	1.17287e+08	1.18892e+08	0	2.00934e+08	0	2.24716e+08	2.25109e+08	1.14743e+08	4.00758e+08	2.61348e+07	9.23176e+07	7.52548e+07	5.48632e+07	2.38541e+07	5.2203e+06	6.36107e+07	5.28489e+07	9.33373e+07	0	0	5.55012e+06	BP:cell migration;BP:cell migration involved in sprouting angiogenesisCC:external side of plasma membrane;CC:integral component of membrane;CC:collagen-containing extracellular matrixMF:extracellular matrix binding;MF:carbohydrate binding;MF:extracellular matrix protein binding	GO:0016477;GO:0002042GO:0009897;GO:0016021;GO:0062023GO:0050840;GO:0030246;GO:1990430	K17528	CLEC14A	------	------	------	------
Q9Y3Q3	Transmembrane emp24 domain-containing protein 3 OS=Homo sapiens OX=9606 GN=TMED3 PE=1 SV=1	8.05	3.009	0.02403	up	yes	191600000	23800000	4.1508e+07	1.19965e+07	6.64625e+06	0	7.99857e+06	2.43428e+07	1.17268e+07	9.33591e+06	0	2.15205e+07	0	1.42457e+07	3.65639e+07	1.29943e+07	8.68057e+07	2.44642e+07	3.97854e+07	0	0	0	7.10346e+06	0	0	6.58113e+06	0	3.90157e+07	0	3.91157e+08	0	4.66929e+07	6.62309e+08	3.96517e+06	0	BP:Golgi organization;BP:retrograde vesicle-mediated transport, Golgi to ER;BP:ER to Golgi vesicle-mediated transport;BP:intracellular protein transportCC:Golgi apparatus;CC:endoplasmic reticulum;CC:endoplasmic reticulum-Golgi intermediate compartment;CC:ER to Golgi transport vesicle;CC:endoplasmic reticulum-Golgi intermediate compartment membrane;CC:endoplasmic reticulum membrane;CC:transport ve…	GO:0007030;GO:0006890;GO:0006888;GO:0006886GO:0005794;GO:0005783;GO:0005793;GO:0030134;GO:0033116;GO:0005789;GO:0030133;GO:0000139;GO:0030126;GO:0032580;GO:0016021	K20350	TMED3	------	------	------	------
Q99436	Proteasome subunit beta type-7 OS=Homo sapiens OX=9606 GN=PSMB7 PE=1 SV=1	0.5158	-0.9551	0.04965	down	yes	72470000	140500000	4.5273e+07	2.76172e+08	2.30968e+08	2.58709e+07	2.32913e+08	6.34285e+07	4.27075e+07	1.95316e+08	0	4.4951e+07	1.22353e+08	2.86066e+08	9.36148e+06	1.7316e+08	9.99578e+07	2.21704e+08	1.18628e+08	2.71894e+08	5.96274e+07	1.90396e+08	9.82573e+07	7.58329e+07	0	1.52723e+08	2.05175e+07	2.94262e+07	1.90182e+08	3.70593e+07	1.62256e+08	1.67247e+07	0	3.65903e+07	3.40754e+06	BP:positive regulation of canonical Wnt signaling pathway;BP:MAPK cascade;BP:NIK/NF-kappaB signaling;BP:tumor necrosis factor-mediated signaling pathway;BP:neutrophil degranulation;BP:regulation of mitotic cell cycle phase transition;BP:interleukin-1-mediated signaling pathway;BP:regulation of transcription from RNA polymerase II promoter in response to hypoxia;BP:protein polyubiquitination;BP:re…	GO:0090263;GO:0000165;GO:0038061;GO:0033209;GO:0043312;GO:1901990;GO:0070498;GO:0061418;GO:0000209;GO:0043488;GO:0043161;GO:0006521;GO:0002479;GO:1902036;GO:0016579;GO:0002223;GO:0090090;GO:0050852;GO:0043687;GO:0031146;GO:0031145;GO:0060071;GO:0010972;GO:0055085;GO:0051603;GO:0038095;GO:0010498;GO:0010499;GO:0016032GO:0019774;GO:1904813;GO:0005737;GO:0005839;GO:0005654;GO:0034774;GO:0000502;GO:0…	K02739	PSMB7	hsa03050	Proteasome	COG0638	O:Posttranslational modification, protein turnover, chaperones
A0A5C2GMY4	IG c604_light_IGKV2D-30_IGKJ1 (Fragment) OS=Homo sapiens OX=9606 PE=2 SV=1	0.1735	-2.527	0.008315	down	yes	31060000	179000000	0	0	1.08483e+07	0	1.03776e+08	400126284	278020711	1.47192e+08	1.47375e+07	4.49924e+08	7.88719e+07	9.41291e+07	2.3144e+07	9.37655e+07	7.32014e+07	3.3416e+08	0	0	0	0	4.04795e+08	0	3.91164e+07	0	3.65257e+07	6.79191e+06	7.50065e+07	1.63581e+07	1.31105e+07	6.84663e+07	8.14289e+06	1.85162e+07	2.85956e+07	------	------	------	------	------	------	------	------
P01033	Metalloproteinase inhibitor 1 OS=Homo sapiens OX=9606 GN=TIMP1 PE=1 SV=1	0.27	-1.889	0.03447	down	yes	43490000	161100000	0	2.20572e+07	1.56505e+08	2.54344e+07	1.29118e+08	3.5453e+08	1.341e+08	1.05831e+08	0	3.48013e+06	0	0	0	6.18092e+08	2.01097e+07	2.8348e+08	1.59954e+08	2.29189e+07	2.09682e+08	1.33047e+08	1.9869e+08	3.58248e+07	1.29218e+07	2.12167e+08	2.85094e+07	1.18273e+07	5.88136e+07	0	1.6666e+07	1.2433e+07	0	3.94499e+07	6.33019e+06	BP:negative regulation of membrane protein ectodomain proteolysis;BP:negative regulation of catalytic activity;BP:cytokine-mediated signaling pathway;BP:cellular protein metabolic process;BP:platelet degranulation;BP:negative regulation of apoptotic process;BP:negative regulation of trophoblast cell migration;BP:extracellular matrix disassembly;BP:connective tissue replacement involved in inflamm…	GO:0051045;GO:0043086;GO:0019221;GO:0044267;GO:0002576;GO:0043066;GO:1901164;GO:0022617;GO:0002248;GO:0008284;GO:0034097;GO:1905049;GO:0043687;GO:2001044;GO:0001775;GO:0051216;GO:0010951;GO:0043434;GO:0010033;GO:0007568;GO:0009725GO:0005788;GO:0031012;GO:0005615;GO:0031093;GO:0005604;GO:0070062;GO:0005576;GO:0005581GO:0005125;GO:0008270;GO:0002020;GO:0030414;GO:0008191;GO:0008083	K16451	TIMP1	hsa04066	HIF-1 signaling pathway	------	------
A0A5C2GR99	IG c1244_heavy_IGHV1-69_IGHD6-19_IGHJ6 (Fragment) OS=Homo sapiens OX=9606 PE=2 SV=1	1.986	0.9899	0.04632	up	yes	135700000	68320000	0	2.91179e+07	2.09667e+07	2.02468e+07	1.61412e+08	4.99767e+07	8.89863e+07	6.91714e+07	2.10041e+08	6.67837e+07	8.53621e+07	2.92592e+07	1.85421e+07	1.87606e+08	1.3685e+07	6.0547e+07	9.72804e+07	1.07339e+07	7.70771e+06	3.01749e+07	1.08885e+08	2.09946e+08	2.60635e+08	2.39722e+07	1.67304e+08	1.73655e+07	2.30709e+07	3.30558e+08	6.1306e+07	5.35975e+07	0	3.01371e+08	4.35241e+07	------	------	------	------	------	------	------	------
A0A5C2GE66	IG c431_heavy_IGHV3-23_IGHD4-17_IGHJ5 (Fragment) OS=Homo sapiens OX=9606 PE=2 SV=1	2.203	1.139	0.04295	up	yes	135400000	61470000	8.77644e+07	0	6.02784e+06	0	1.04062e+07	1.2094e+07	1.31636e+08	1.23458e+08	5.07139e+07	2.31657e+07	7.87939e+07	0	9.48671e+06	1.0846e+08	0	0	0	0	0	4.7861e+07	1.09252e+08	2.00273e+08	2.82752e+08	0	2.36222e+08	0	3.76784e+07	0	8.03399e+06	1.72065e+07	0	2.06798e+08	9.46348e+07	------	------	------	------	------	------	------	------
A5PLM9	Cathepsin L1 OS=Homo sapiens OX=9606 GN=CTSL1 PE=2 SV=1	0.2151	-2.217	0.01521	down	yes	34420000	160000000	1.17193e+07	2.29329e+07	2.33944e+08	0	4.27636e+07	1.36574e+08	5.37688e+08	1.969e+08	2.54524e+07	3.99205e+08	2.06853e+08	1.33033e+07	5.97275e+06	1.43347e+08	0	6.28605e+07	3.69871e+07	1.98927e+08	2.03601e+08	1.0448e+08	4.57232e+08	1.26971e+08	3.72634e+07	5.65548e+06	1.36553e+07	5.03121e+06	2.57214e+07	1.92666e+07	6.26262e+07	0	1.99253e+07	5.81711e+06	5.66675e+07	BP:cellular response to thyroid hormone stimulus;BP:macrophage apoptotic process;BP:toll-like receptor signaling pathway;BP:proteolysis;BP:extracellular matrix disassembly;BP:antigen processing and presentation;BP:antigen processing and presentation of exogenous peptide antigen via MHC class II;BP:proteolysis involved in cellular protein catabolic process;BP:collagen catabolic process;BP:adaptive…	GO:0097067;GO:0071888;GO:0002224;GO:0006508;GO:0022617;GO:0019882;GO:0019886;GO:0051603;GO:0030574;GO:0002250;GO:0045616GO:0043202;GO:0070062;GO:0036021;GO:0005771;GO:0062023;GO:0005886;GO:0005615;GO:0005764;GO:0005576;GO:0005634GO:0042393;GO:0097655;GO:0008234;GO:0004197;GO:0001968;GO:0043394;GO:0005518	K01365	CTSL	hsa04612;hsa05205;hsa05323;hsa05418;hsa04140;hsa04142;hsa04145;hsa04210	Antigen processing and presentation;Proteoglycans in cancer;Rheumatoid arthritis;Fluid shear stress and atherosclerosis;Autophagy - animal;Lysosome;Phagosome;Apoptosis	COG4870	O:Posttranslational modification, protein turnover, chaperones
O43301	Heat shock 70 kDa protein 12A OS=Homo sapiens OX=9606 GN=HSPA12A PE=1 SV=2	2.379	1.25	0.003422	up	yes	134700000	56610000	4.5725e+07	1.29486e+08	1.0957e+08	1.01432e+08	6.37479e+07	5.41972e+07	0	9.04858e+07	2.16919e+06	1.58724e+07	1.24202e+08	5.44127e+07	1.43584e+07	2.47345e+07	2.97585e+07	8.40809e+06	2.96718e+07	9.13611e+07	1.73835e+06	1.2436e+08	1.64532e+07	2.33187e+08	1.10308e+08	1.64467e+08	2.41453e+08	1.94274e+07	3.07833e+08	5.55533e+07	1.77908e+08	4.84095e+07	1.62739e+08	6.90674e+07	2.63269e+07	CC:extracellular exosomeMF:ATP binding	GO:0070062GO:0005524	------	------	------	------	COG0443	O:Posttranslational modification, protein turnover, chaperones
D3YTG3	Target of Nesh-SH3 OS=Homo sapiens OX=9606 GN=ABI3BP PE=1 SV=1	0.2912	-1.78	0.03693	down	yes	42890000	147300000	3.64193e+08	0	6.15186e+08	7.47026e+07	7.49622e+07	2.25272e+07	4.27758e+07	2.05983e+08	0	8.52965e+07	6.46435e+07	3.62499e+07	0	0	0	2.8306e+07	1.54908e+08	1.82565e+08	3.00388e+08	2.49223e+07	7.97721e+07	3.91644e+07	6.12084e+07	7.46246e+07	4.04369e+07	1.58454e+07	1.75888e+07	1.66862e+07	4.7147e+07	1.23713e+07	1.9921e+07	1.38293e+08	3.14392e+07	------	------	------	------	------	------	------	------
O95758	Polypyrimidine tract-binding protein 3 OS=Homo sapiens OX=9606 GN=PTBP3 PE=1 SV=2	3.864	1.95	0.0345	up	yes	150100000	38850000	1.88555e+07	4.37746e+07	1.28302e+07	4.62471e+07	1.82274e+07	3.06027e+07	0	1.40863e+07	6.3108e+06	6.21352e+07	0	2.12323e+07	3.64634e+08	4.6599e+06	4.80052e+07	1.60764e+07	1.34339e+07	2.03445e+06	4.51725e+06	5.35367e+06	5.08082e+06	2.16364e+06	0	5.0685e+07	4.40908e+07	5.66234e+08	5.6144e+07	4.1688e+08	2.3907e+07	1.86608e+08	7.94485e+07	7.48696e+07	0	BP:negative regulation of RNA splicing;BP:regulation of cell differentiation;BP:erythrocyte maturation;BP:anatomical structure morphogenesis;BP:RNA splicing;BP:mRNA processingCC:nucleusMF:RNA binding	GO:0033119;GO:0045595;GO:0043249;GO:0009653;GO:0008380;GO:0006397GO:0005634GO:0003723	K17844	PTBP3, ROD1	------	------	------	------
E9PE82	Short-chain-specific acyl-CoA dehydrogenase, mitochondrial OS=Homo sapiens OX=9606 GN=ACADS PE=1 SV=1	1.818	0.8624	0.04392	up	yes	114800000	63140000	1.25566e+08	9.84299e+07	8.93156e+07	9.42751e+06	1.23229e+08	1.39288e+08	2.11512e+07	1.38073e+07	0	7.53181e+06	1.76273e+07	0	1.28053e+08	3.23972e+07	1.64197e+07	1.40211e+07	3.43191e+07	1.62234e+08	2.83948e+07	1.35055e+08	3.39519e+06	1.79325e+07	3.2242e+06	1.32918e+08	0	1.06183e+08	1.69943e+08	8.18247e+07	7.41622e+07	1.36133e+08	2.22807e+08	2.03134e+08	0	BP:fatty acid beta-oxidation;BP:fatty acid beta-oxidation using acyl-CoA dehydrogenase;BP:butyrate catabolic processCC:nucleus;CC:mitochondrion;CC:nucleoplasm;CC:mitochondrial matrixMF:flavin adenine dinucleotide binding;MF:butyryl-CoA dehydrogenase activity;MF:acyl-CoA dehydrogenase activity	GO:0006635;GO:0033539;GO:0046359GO:0005634;GO:0005739;GO:0005654;GO:0005759GO:0050660;GO:0004085;GO:0003995	------	------	------	------	COG1960	I:Lipid transport and metabolism
A0A5C2G2H9	IGL c2252_light_IGKV2D-29_IGKJ2 (Fragment) OS=Homo sapiens OX=9606 PE=2 SV=1	3.98	1.993	0.0191	up	yes	141000000	35430000	0	4.09219e+06	1.24463e+07	0	0	4.65302e+07	7.02966e+07	2.73386e+07	0	1.13813e+07	3.35605e+07	0	4.36301e+06	2.01648e+08	0	0	1.72937e+07	0	1.69763e+06	1.9665e+06	2.79131e+07	3.08287e+07	2.07724e+08	0	2.47006e+08	0	0	3.88991e+08	1.29851e+07	0	1.00903e+08	7.36166e+06	1.32439e+08	------	------	------	------	------	------	------	------
Q75MQ1	Uncharacterized protein CUL1 (Fragment) OS=Homo sapiens OX=9606 GN=CUL1 PE=3 SV=1	2.179	1.124	0.04055	up	yes	119300000	54740000	2.52796e+07	6.73884e+07	8.27769e+07	6.66207e+06	6.80251e+07	8.95486e+07	1.34164e+07	1.16654e+08	6.36018e+06	6.55443e+06	5.5084e+06	0	4.0618e+07	2.80704e+07	4.65002e+07	4.3605e+07	0	1.53434e+08	2.10002e+07	1.90188e+08	2.8502e+07	1.064e+08	6.24315e+07	8.53055e+07	9.6938e+06	2.32988e+07	4.31164e+07	2.05492e+07	4.17276e+08	1.19385e+08	1.94289e+08	2.10628e+08	1.39789e+08	BP:G2/M transition of mitotic cell cycle;BP:NIK/NF-kappaB signaling;BP:G1/S transition of mitotic cell cycle;BP:T cell receptor signaling pathway;BP:intrinsic apoptotic signaling pathway;BP:regulation of mitotic cell cycle phase transition;BP:interleukin-1-mediated signaling pathway;BP:protein polyubiquitination;BP:protein monoubiquitination;BP:proteasome-mediated ubiquitin-dependent protein cata…	GO:0000086;GO:0038061;GO:0000082;GO:0050852;GO:0097193;GO:1901990;GO:0070498;GO:0000209;GO:0006513;GO:0043161;GO:0051403;GO:0002223;GO:0009887;GO:0006879;GO:0008283;GO:0043687;GO:0006915;GO:0031146;GO:0010972;GO:0038095;GO:0010265;GO:0016055;GO:0016567;GO:0006511;GO:0016032GO:1990452;GO:0005654;GO:0031461;GO:0005829;GO:0019005GO:0031625	K03347	CUL1, CDC53	hsa04350;hsa04340;hsa04110;hsa04114;hsa04141;hsa05168;hsa04120;hsa04710;hsa04310	TGF-beta signaling pathway;Hedgehog signaling pathway;Cell cycle;Oocyte meiosis;Protein processing in endoplasmic reticulum;Herpes simplex infection;Ubiquitin mediated proteolysis;Circadian rhythm;Wnt signaling pathway	COG5647	O:Posttranslational modification, protein turnover, chaperones
P35813	Protein phosphatase 1A OS=Homo sapiens OX=9606 GN=PPM1A PE=1 SV=1	2.792	1.481	0.002241	up	yes	123000000	44050000	1.36067e+07	8.67448e+07	8.07669e+07	5.27797e+07	1.38812e+08	2.69469e+07	0	4.15924e+07	3.90799e+06	9.05176e+06	4.17709e+06	2.63681e+07	4.57399e+07	7.89006e+07	2.82668e+07	1.37705e+07	0	8.63114e+07	1.049e+07	8.05274e+07	8.20016e+06	2.39612e+08	0	1.12245e+08	1.35371e+07	9.11579e+07	1.04456e+08	2.70043e+08	1.64489e+08	1.47032e+08	1.56117e+07	1.90687e+08	3.88364e+06	BP:positive regulation of canonical Wnt signaling pathway;BP:protein dephosphorylation;BP:negative regulation of NIK/NF-kappaB signaling;BP:positive regulation of protein export from nucleus;BP:negative regulation of transcription from RNA polymerase II promoter;BP:dephosphorylation;BP:peptidyl-threonine dephosphorylation;BP:negative regulation of I-kappaB kinase/NF-kappaB signaling;BP:negative r…	GO:0090263;GO:0006470;GO:1901223;GO:0046827;GO:0000122;GO:0016311;GO:0035970;GO:0043124;GO:0010991;GO:0043123;GO:0007050;GO:0045893;GO:0030514;GO:0030512;GO:0006499;GO:0071560GO:0005634;GO:0016020;GO:0005654;GO:0005886;GO:0005829GO:0000287;GO:0004721;GO:0070412;GO:0030145;GO:0004724;GO:0004722;GO:0033192	K04457	PPM1A, PP2CA	hsa04010	MAPK signaling pathway	COG0631	T:Signal transduction mechanisms
Q5IJ48	Protein crumbs homolog 2 OS=Homo sapiens OX=9606 GN=CRB2 PE=1 SV=2	2.402	1.264	0.00217	up	yes	116800000	48620000	5.92629e+07	9.55295e+07	9.15581e+07	3.41183e+07	4.22422e+07	1.0774e+07	4.72083e+07	1.42543e+07	8.00783e+06	3.68639e+07	1.11068e+08	0	0	0	6.32936e+06	0	0	5.36942e+06	7.66032e+07	0	9.01231e+07	1.5916e+08	1.506e+08	1.57184e+08	0	0	1.7461e+08	1.18234e+08	1.0081e+08	1.52333e+08	0	3.84066e+06	3.4749e+07	BP:maintenance of epithelial cell apical/basal polarity;BP:somitogenesis;BP:mesoderm formation;BP:positive regulation of epithelial to mesenchymal transition;BP:notochord formation;BP:establishment or maintenance of epithelial cell apical/basal polarity;BP:cardiovascular system development;BP:regulation of gastrulation;BP:negative regulation of endopeptidase activity;BP:heterophilic cell-cell adh…	GO:0045199;GO:0001756;GO:0001707;GO:0010718;GO:0014028;GO:0045197;GO:0072358;GO:0010470;GO:0010951;GO:0007157;GO:0055111;GO:0030513GO:0032991;GO:0016324;GO:0016021;GO:0005886;GO:0070062GO:0019828;GO:0044877;GO:0005509	K16681	CRB	hsa04390	Hippo signaling pathway	------	------
A0A5C2H2Z5	IG c1356_light_IGKV3-11_IGKJ4 (Fragment) OS=Homo sapiens OX=9606 PE=2 SV=1	2.025	1.018	0.03785	up	yes	110100000	54380000	0	1.6782e+07	0	1.04448e+07	4.71949e+07	6.69176e+07	1.65689e+07	8.91427e+07	1.88093e+08	1.9985e+07	6.06926e+07	2.75534e+07	0	2.09079e+07	0	7.31076e+07	0	5.72179e+07	9.42562e+06	3.03404e+07	1.35715e+08	1.46134e+08	1.19986e+08	4.12983e+07	1.51282e+08	0	0	0	6.58096e+07	8.50301e+07	3.25289e+07	2.82121e+08	6.64584e+07	------	------	------	------	------	------	------	------
Q8NI35	InaD-like protein OS=Homo sapiens OX=9606 GN=PATJ PE=1 SV=3	3.741	1.903	0.04791	up	yes	126900000	33920000	0	5.3803e+07	5.07995e+07	1.44194e+07	2.65976e+07	1.40536e+07	1.43409e+08	5.4798e+07	2.51971e+07	6.65086e+06	4.79184e+06	2.30245e+07	0	1.81564e+07	1.80208e+07	2.42161e+07	6.84902e+07	1.60614e+07	2.40357e+07	2.40989e+07	3.39214e+07	2.5809e+07	0	5.63727e+07	0	1.33542e+07	6.75733e+07	3.03114e+08	1.98925e+07	3.16176e+07	6.18174e+08	1.23399e+08	9.93336e+06	BP:bicellular tight junction assembly;BP:intracellular signal transductionCC:apical part of cell;CC:extracellular exosome;CC:perinuclear region of cytoplasm;CC:apical plasma membrane;CC:centrosome;CC:cytosol;CC:microtubule organizing center;CC:plasma membrane;CC:bicellular tight junction;CC:cell junction	GO:0070830;GO:0035556GO:0045177;GO:0070062;GO:0048471;GO:0016324;GO:0005813;GO:0005829;GO:0005815;GO:0005886;GO:0005923;GO:0030054	K06092	INADL, PATJ	hsa04530;hsa04390	Tight junction;Hippo signaling pathway	------	------
A0A5C2GQD4	IG c1542_heavy_IGHV4-39_IGHD4-17_IGHJ4 (Fragment) OS=Homo sapiens OX=9606 PE=2 SV=1	2.143	1.1	0.04197	up	yes	109400000	51060000	3.17604e+07	4.81515e+07	3.48146e+07	1.17698e+07	3.953e+07	5.24176e+07	1.15107e+07	8.17308e+07	5.02912e+07	0	8.38741e+07	0	3.86424e+07	2.5181e+08	4.4618e+07	2.11629e+07	4.59094e+07	3.42075e+07	5.50666e+06	0	3.14247e+07	1.27749e+08	7.59178e+07	2.36498e+07	1.14894e+08	6.29916e+07	5.62134e+07	7.1905e+07	9.39071e+07	9.22454e+07	3.88587e+07	1.67955e+08	3.86435e+08	------	------	------	------	------	------	------	------
A0A5C2GHB9	IG c974_light_IGKV4-1_IGKJ5 (Fragment) OS=Homo sapiens OX=9606 PE=2 SV=1	2.242	1.165	0.03008	up	yes	108500000	48400000	3.36139e+07	7.45143e+06	0	4.0671e+07	1.59885e+08	3.14441e+07	1.46413e+07	3.74591e+07	2.54614e+07	1.05402e+07	1.7122e+08	1.1082e+07	7.24945e+07	7.28904e+07	0	3.07468e+07	0	0	2.35276e+07	4.19402e+06	7.54394e+07	8.12905e+07	1.5313e+08	3.74559e+07	8.99706e+07	0	6.14864e+07	0	3.30354e+07	4.82199e+07	0	1.8772e+08	2.84076e+08	------	------	------	------	------	------	------	------
F8W7H5	Uncharacterized protein C9orf131 (Fragment) OS=Homo sapiens OX=9606 GN=C9orf131 PE=4 SV=1	0.337	-1.569	0.006836	down	yes	39430000	117000000	0	1.97198e+07	2.80785e+08	1.39467e+08	0	1.69649e+08	7.23873e+07	1.72703e+08	0	8.98689e+07	0	5.89037e+07	0	3.19494e+07	0	3.31944e+07	0	1.62503e+08	6.95995e+07	1.50848e+08	1.85864e+08	5.00352e+07	8.77887e+07	2.93467e+07	3.77987e+07	0	3.86158e+07	2.39854e+07	1.3299e+07	0	4.61508e+07	0	2.78191e+07	------	------	------	------	------	------	------	------
A0A5C2GVM3	IG c846_light_IGKV3-20_IGKJ4 (Fragment) OS=Homo sapiens OX=9606 PE=2 SV=1	2.347	1.231	0.02082	up	yes	109600000	46700000	3.43244e+07	8.57795e+06	0	6.16227e+07	1.09547e+07	4.79929e+07	1.27272e+08	7.7567e+07	8.87672e+07	1.73142e+07	5.09342e+07	1.0878e+07	1.43894e+07	1.14943e+08	0	1.50261e+07	9.02661e+06	4.34984e+07	0	2.85971e+07	7.88877e+07	1.91141e+08	2.82985e+08	0	3.14758e+07	0	0	7.79139e+07	1.76712e+07	2.19994e+07	0	1.53633e+08	1.00084e+08	------	------	------	------	------	------	------	------
P10643	Complement component C7 OS=Homo sapiens OX=9606 GN=C7 PE=1 SV=2	3.742	1.904	0.02705	up	yes	122300000	32680000	0	8.15244e+06	7.16696e+07	0	5.7105e+07	3.49174e+07	9.62643e+06	4.41219e+07	3.57297e+07	0	1.49634e+07	2.01864e+07	6.82817e+06	1.34016e+08	2.83188e+06	6.31596e+06	5.10547e+06	4.64873e+07	0	0	2.47552e+07	9.93673e+07	1.85604e+07	8.4109e+06	4.55225e+07	0	1.00732e+07	4.4169e+08	1.18056e+08	4.99329e+07	3.06434e+07	3.6836e+08	1.54929e+08	BP:cytolysis;BP:regulation of complement activation;BP:cellular sodium ion homeostasis;BP:complement activation;BP:complement activation, alternative pathway;BP:complement activation, classical pathwayCC:extracellular exosome;CC:extracellular region;CC:membrane attack complex	GO:0019835;GO:0030449;GO:0006883;GO:0006956;GO:0006957;GO:0006958GO:0070062;GO:0005576;GO:0005579	K03996	C7	hsa05322;hsa04610;hsa05020	Systemic lupus erythematosus;Complement and coagulation cascades;Prion diseases	------	------
A0A5C2GRG2	IG c1304_heavy_IGHV3-7_IGHD3-3_IGHJ3 (Fragment) OS=Homo sapiens OX=9606 PE=2 SV=1	5.061	2.339	0.005242	up	yes	129300000	25550000	1.32486e+07	1.46069e+07	9.78075e+06	0	2.18155e+07	1.2824e+07	0	2.75314e+07	2.35581e+07	7.85213e+06	3.84069e+07	8.42544e+06	2.97937e+07	1.03976e+08	0	0	0	2.04211e+07	0	0	2.54775e+07	3.22104e+08	2.95442e+08	0	1.12451e+08	9.68113e+06	5.36238e+07	0	5.90197e+06	6.40034e+07	2.9477e+07	1.23959e+08	2.75878e+08	------	------	------	------	------	------	------	------
A0A5C2FU62	IGL c104_light_IGLV8-61_IGLJ3 (Fragment) OS=Homo sapiens OX=9606 PE=2 SV=1	2.099	1.07	0.03877	up	yes	104200000	49650000	1.53453e+08	2.80579e+07	9.01409e+06	0	9.97506e+07	0	0	0	5.10044e+07	0	0	3.30111e+07	9.61477e+06	5.023e+07	1.00286e+07	7.22344e+07	0	1.79208e+07	0	2.19806e+07	8.91476e+07	1.72751e+08	1.4114e+08	0	0	1.19867e+07	3.37425e+07	8.50972e+07	0	4.8441e+07	0	1.35798e+08	2.04349e+08	------	------	------	------	------	------	------	------
Q8TEM1	Nuclear pore membrane glycoprotein 210 OS=Homo sapiens OX=9606 GN=NUP210 PE=1 SV=3	5.308	2.408	0.007482	up	yes	129200000	24340000	3.30283e+07	1.31548e+07	2.16058e+06	1.01055e+08	0	1.14106e+07	1.48639e+07	2.5517e+06	1.1936e+07	0	0	2.66649e+06	2.08511e+07	0	2.53799e+07	0	5.2992e+07	0	0	0	0	0	0	0	0	9.64312e+06	1.14461e+07	2.78175e+08	0	1.05686e+08	1.17171e+08	0	2.52939e+08	BP:viral process;BP:regulation of cellular response to heat;BP:viral transcription;BP:intracellular transport of virus;BP:tRNA export from nucleus;BP:regulation of gene silencing by miRNA;BP:regulation of glycolytic process;BP:protein sumoylation;BP:mRNA export from nucleusCC:membrane;CC:endoplasmic reticulum membrane;CC:integral component of membrane;CC:nuclear membrane;CC:host cell;CC:nuclear p…	GO:0016032;GO:1900034;GO:0019083;GO:0075733;GO:0006409;GO:0060964;GO:0006110;GO:0016925;GO:0006406GO:0016020;GO:0005789;GO:0016021;GO:0031965;GO:0043657;GO:0005643;GO:0005635GO:0046983	K14314	NUP210, GP210	hsa03013	RNA transport	------	------
C9JFR7	Cytochrome c (Fragment) OS=Homo sapiens OX=9606 GN=CYCS PE=1 SV=1	0.2717	-1.88	0.005628	down	yes	31790000	117000000	1.13679e+08	2.2291e+07	2.34995e+07	1.48147e+08	0	4.3495e+07	1.73307e+08	5.84458e+07	0	1.71377e+08	1.8296e+08	2.9702e+08	8.58672e+07	5.08741e+07	1.78201e+07	1.19306e+07	2.18582e+08	3.39191e+08	2.62701e+07	1.40667e+08	9.76275e+07	9.62028e+06	8.35202e+07	7.41198e+07	2.29892e+07	1.11508e+07	1.21976e+07	5.90363e+07	9.12333e+06	1.43311e+07	3.48229e+07	1.56449e+07	3.48718e+07	BP:activation of cysteine-type endopeptidase activity involved in apoptotic process by cytochrome c;BP:protein dephosphorylation;BP:apoptotic process;BP:mitochondrial electron transport, cytochrome c to oxygen;BP:mitochondrial electron transport, ubiquinol to cytochrome c;BP:cellular response to oxidative stress;BP:cellular respiration;BP:mitochondrion organizationCC:protein phosphatase type 2A c…	GO:0008635;GO:0006470;GO:0006915;GO:0006123;GO:0006122;GO:0034599;GO:0045333;GO:0007005GO:0000159;GO:0005634;GO:0005739;GO:0005743;GO:0005758;GO:0070469;GO:0005829GO:0020037;GO:0046872;GO:0045155;GO:0009055	K08738	CYC	hsa05134;hsa05010;hsa05210;hsa05152;hsa01524;hsa05200;hsa05416;hsa04115;hsa05164;hsa00920;hsa05168;hsa05012;hsa05145;hsa05014;hsa04210;hsa05016;hsa04215;hsa05161;hsa04932;hsa05222	Legionellosis;Alzheimer's disease;Colorectal cancer;Tuberculosis;Platinum drug resistance;Pathways in cancer;Viral myocarditis;p53 signaling pathway;Influenza A;Sulfur metabolism;Herpes simplex infection;Parkinson's disease;Toxoplasmosis;Amyotrophic lateral sclerosi;Apoptosis;Huntington's disease;Apoptosis - multiple species;Hepatitis B;Non-alcoholic fatty liver diseas;Small cell lung cancer	COG3474	C:Energy production and conversion
A0A5C2G5W1	IGH c97_heavy__IGHV4-39_IGHD1-14_IGHJ6 (Fragment) OS=Homo sapiens OX=9606 PE=2 SV=1	2.419	1.274	0.02586	up	yes	103000000	42580000	2.62202e+07	2.08755e+07	2.99349e+07	0	7.00939e+07	4.23419e+07	2.47497e+07	3.39256e+07	2.61193e+07	3.63344e+06	1.40442e+07	4.91223e+06	0	2.41124e+08	0	1.20527e+07	0	5.58818e+07	7.81679e+06	1.45487e+07	9.567e+07	1.53506e+08	8.63632e+07	8.99154e+06	6.66393e+07	3.09295e+06	1.44019e+07	1.5488e+08	7.64264e+07	1.80881e+08	4.32927e+07	2.13616e+08	2.33603e+08	------	------	------	------	------	------	------	------
A0A5C2GKP3	IG c125_heavy_IGHV3-7_IGHD3-3_IGHJ3 (Fragment) OS=Homo sapiens OX=9606 PE=2 SV=1	6.271	2.649	0.007245	up	yes	121100000	19310000	0	9.58964e+06	1.01872e+07	0	1.23423e+07	0	1.13785e+07	1.02716e+07	2.12107e+07	1.1932e+07	2.07778e+07	6.45694e+06	0	7.51331e+07	0	0	0	0	0	2.30383e+07	1.94048e+07	1.54602e+08	3.35236e+08	0	3.66808e+07	0	0	0	0	1.96003e+07	0	8.43423e+07	9.61102e+07	------	------	------	------	------	------	------	------
P61513	60S ribosomal protein L37a OS=Homo sapiens OX=9606 GN=RPL37A PE=1 SV=2	3.325	1.733	0.01179	up	yes	105900000	31850000	0	1.25018e+08	3.27969e+06	3.26028e+07	6.48464e+07	4.40731e+07	1.84136e+07	1.69615e+07	0	2.72052e+06	0	1.72021e+07	0	0	0	2.393e+07	1.28353e+07	1.91886e+07	0	3.29586e+07	0	0	6.33657e+07	2.3183e+07	0	1.46613e+08	1.32694e+08	0	0	0	2.41316e+08	2.84337e+07	0	BP:translationCC:ribosomeMF:structural constituent of ribosome;MF:metal ion binding	GO:0006412GO:0005840GO:0003735;GO:0046872	K02921	RP-L37Ae, RPL37A	hsa03010	Ribosome	COG1997	J:Translation, ribosomal structure and biogenesis
A0A5C2GI74	IG c852_heavy_IGHV4-39_IGHD6-19_IGHJ3 (Fragment) OS=Homo sapiens OX=9606 PE=2 SV=1	2.519	1.333	0.001562	up	yes	97430000	38680000	1.44673e+07	2.56758e+07	6.05921e+07	0	4.03902e+07	2.53401e+07	3.38732e+07	5.41201e+07	1.78016e+07	5.04539e+06	4.76383e+06	3.61662e+07	1.89526e+07	1.24222e+08	0	4.60828e+06	1.05215e+07	9.56345e+07	1.38369e+07	9.29141e+07	5.59379e+07	1.46931e+08	7.16155e+07	0	1.66969e+08	0	0	8.15913e+07	6.84788e+07	4.42689e+07	1.38407e+07	1.43903e+08	1.39277e+08	------	------	------	------	------	------	------	------
A0A5C2GLH1	IG c951_heavy_IGHV4-39_IGHD2-21_IGHJ4 (Fragment) OS=Homo sapiens OX=9606 PE=2 SV=1	2.587	1.371	0.01925	up	yes	97070000	37520000	0	6.85385e+06	1.54096e+08	0	2.48445e+07	3.32741e+07	2.62878e+07	3.57034e+07	4.3105e+07	1.86386e+07	8.28759e+06	9.77474e+06	1.50367e+07	9.29751e+07	5.44549e+06	5.86762e+06	7.77424e+07	3.78208e+07	1.34956e+07	1.45213e+07	8.91064e+07	2.43004e+08	4.31792e+07	0	5.10435e+07	0	3.5132e+06	0	5.84606e+07	0	0	1.17458e+08	1.62855e+08	------	------	------	------	------	------	------	------
A0A5C2GGH9	IG c724_heavy_IGHV3-13_IGHD5-12_IGHJ2 (Fragment) OS=Homo sapiens OX=9606 PE=2 SV=1	3.912	1.968	0.02427	up	yes	106200000	27150000	0	1.11608e+07	0	0	9.54955e+06	1.27508e+07	4.64501e+07	4.75012e+07	3.74604e+07	6.04313e+06	5.27187e+07	0	0	3.39642e+07	0	0	0	0	2.29886e+07	0	1.80401e+07	1.17909e+08	3.00249e+08	0	7.23054e+06	0	0	0	3.68659e+07	0	0	5.57859e+07	1.19238e+08	------	------	------	------	------	------	------	------
A0A024R8V0	Septin 9, isoform CRA_a OS=Homo sapiens OX=9606 GN=SEPT9 PE=3 SV=1	1.877	0.9084	0.04028	up	yes	86660000	46170000	2.10834e+07	9.05332e+07	7.14304e+07	3.52599e+07	7.59339e+07	5.06769e+07	6.94932e+07	5.37894e+07	4.75755e+06	3.79556e+07	0	5.80174e+07	5.66498e+07	5.09386e+06	8.65553e+07	2.29602e+07	1.79486e+07	5.80884e+07	1.58089e+07	8.33476e+07	8.02802e+06	1.8942e+07	1.56156e+08	4.72475e+07	1.26742e+07	2.06322e+08	1.45868e+08	6.68597e+07	4.21328e+07	2.03009e+08	1.21713e+07	4.18673e+07	0	BP:protein heterooligomerization;BP:cytoskeleton-dependent cytokinesis;BP:positive regulation of non-motile cilium assemblyCC:cytoplasm;CC:stress fiber;CC:septin complex;CC:microtubule cytoskeleton;CC:septin ring;CC:actin cytoskeleton;CC:non-motile cilium;CC:perinuclear region of cytoplasm;CC:microtubule;CC:axonemeMF:GTPase activity;MF:cadherin binding;MF:GTP binding	GO:0051291;GO:0061640;GO:1902857GO:0005737;GO:0001725;GO:0031105;GO:0015630;GO:0005940;GO:0015629;GO:0097730;GO:0048471;GO:0005874;GO:0005930GO:0003924;GO:0045296;GO:0005525	K16938	SEPT3_9_12	hsa05100	Bacterial invasion of epithelial cells	COG5019;COG5019	D:Cell cycle control, cell division, chromosome partitioning;Z:Cytoskeleton
Q53F10	UV excision repair protein RAD23 homolog B variant (Fragment) OS=Homo sapiens OX=9606 PE=2 SV=1	2.202	1.139	0.01825	up	yes	85970000	39050000	1.78077e+07	4.23791e+07	6.9924e+06	3.59722e+07	1.35337e+08	5.99741e+06	1.26794e+07	1.91335e+07	4.36886e+06	3.86051e+07	1.39773e+07	1.15737e+08	2.81231e+07	1.91974e+07	7.86055e+07	5.8264e+07	2.69831e+07	4.18973e+07	0	4.66002e+07	3.23921e+07	1.74401e+07	0	9.50353e+07	0	1.85296e+08	1.10193e+08	7.7039e+07	4.1273e+07	0	1.54246e+08	7.23298e+06	0	BP:nucleotide-excision repair, preincision complex assembly;BP:protein folding;BP:regulation of proteasomal ubiquitin-dependent protein catabolic process;BP:embryonic organ development;BP:global genome nucleotide-excision repair;BP:proteasome-mediated ubiquitin-dependent protein catabolic process;BP:protein deubiquitination;BP:nucleotide-excision repair;BP:spermatogenesis;BP:cellular response to …	GO:0006294;GO:0006457;GO:0032434;GO:0048568;GO:0070911;GO:0043161;GO:0016579;GO:0006289;GO:0007283;GO:0098761;GO:0000717;GO:0000715GO:0071942;GO:0005634;GO:0005654;GO:0000502;GO:0005829GO:0031593;GO:0070628;GO:0003697;GO:0043130;GO:0003684	K10839	RAD23, HR23	hsa04141;hsa03420	Protein processing in endoplasmic reticulum;Nucleotide excision repair	COG5272	O:Posttranslational modification, protein turnover, chaperones
A0A2U8J970	Ig heavy chain variable region (Fragment) OS=Homo sapiens OX=9606 GN=IgH PE=2 SV=1	3.655	1.87	0.009904	up	yes	96710000	26460000	1.52083e+07	918014	0	0	3.76387e+07	1.36626e+07	1.6832e+07	2.63127e+07	3.39548e+07	0	0	3.50024e+07	0	4.07802e+07	0	2.3803e+07	4.06001e+07	5.80661e+07	6.47654e+06	0	2.11884e+07	7.069e+07	9.1488e+07	3.40099e+07	1.35498e+08	8.82661e+06	9.60626e+06	142438286	2.07267e+07	3.99125e+07	8.67364e+07	1.96055e+08	3.24527e+08	------	------	------	------	------	------	------	------
A0A5C2GPN1	IG c1355_heavy_IGHV4-4_IGHD2-2_IGHJ1 (Fragment) OS=Homo sapiens OX=9606 PE=2 SV=1	2.792	1.481	0.01812	up	yes	89220000	31950000	0	2.17135e+07	1.62712e+07	0	1.98827e+07	4.38219e+07	8.76479e+07	6.01383e+07	9.8874e+06	7.76872e+06	0	0	0	1.02946e+08	0	3.01782e+06	7.6496e+06	4.23745e+07	1.97203e+07	9.02553e+06	2.74522e+07	2.066e+08	1.5188e+08	1.41448e+06	2.4534e+07	0	1.83008e+07	1.51933e+08	5.37567e+07	5.33509e+07	8.41344e+06	2.20038e+08	9.11633e+07	------	------	------	------	------	------	------	------
A0A5C2GLB4	IG c126_heavy_IGHV3-74_IGHD2-15_IGHJ4 (Fragment) OS=Homo sapiens OX=9606 PE=2 SV=1	4.154	2.055	0.01294	up	yes	96380000	23200000	0	2.31148e+07	3.69962e+06	2.05975e+07	5.64149e+06	4.11434e+07	1.35043e+07	3.44648e+07	2.25583e+07	1.6032e+07	0	6.08989e+06	3.1499e+06	1.15288e+08	2.13988e+07	0	5.4657e+06	3.23491e+07	4.49624e+06	3.29904e+07	1.56756e+07	1.55915e+08	4.96071e+07	2.18759e+06	2.29092e+08	3.12308e+06	9.27947e+07	0	2.18031e+07	4.04246e+07	4.85631e+07	3.68051e+08	4.86358e+07	------	------	------	------	------	------	------	------
A0A5C2GAM9	IGH + IGL c155_light_IGLV1-51_IGLJ2 (Fragment) OS=Homo sapiens OX=9606 PE=2 SV=1	3.574	1.838	0.02704	up	yes	87180000	24390000	0	1.5756e+07	1.07885e+07	0	0	1.57023e+07	1.25268e+07	3.8257e+07	6.14378e+07	1.46109e+07	0	1.30732e+07	6.10137e+06	6.17993e+07	1.12776e+07	0	0	0	0	0	3.13409e+07	4.04138e+07	8.38016e+07	0	6.65729e+07	8.29086e+06	2.95303e+07	9.28279e+07	0	8.71021e+07	3.2559e+08	9.73609e+07	4.03056e+07	------	------	------	------	------	------	------	------
Q6ZMD1	cDNA FLJ23994 fis, clone HRC11286 OS=Homo sapiens OX=9606 PE=2 SV=1	0.3412	-1.551	0.03289	down	yes	28090000	82330000	7.5863e+06	0	8.87079e+07	0	2.56548e+08	1.42425e+07	3.51485e+07	1.02014e+08	0	5.21205e+07	5.9002e+07	2.0063e+08	0	1.35034e+06	0	2.82308e+07	1.43162e+07	9.65001e+07	1.43396e+08	9.72212e+07	1.2029e+08	2.13958e+07	2.67846e+07	1.42225e+08	8.45833e+06	2.68227e+06	3.73788e+07	1.60857e+07	1.08797e+07	3.31079e+06	0	9.37432e+06	3.04422e+07	BP:long-term memory;BP:visual learningCC:integral component of plasma membrane;CC:extracellular exosome	GO:0007616;GO:0008542GO:0005887;GO:0070062	------	------	------	------	------	------
Q5JQ44	Uncharacterized protein DKFZp547A0616 (Fragment) OS=Homo sapiens OX=9606 GN=DKFZp547A0616 PE=2 SV=1	2.099	1.07	0.01772	up	yes	74730000	35610000	5.33165e+07	8.13304e+07	5.85491e+07	2.27079e+07	3.20174e+07	5.67361e+07	6.31245e+06	1.81955e+07	0	1.68692e+07	0	6.00345e+07	7.28739e+07	9.63424e+06	5.30665e+07	1.29577e+07	6.34925e+06	4.63507e+07	4.42526e+06	5.6982e+07	7.85644e+06	2.05923e+07	0	6.84937e+07	0	5.66185e+07	8.5111e+07	1.6858e+08	5.14244e+07	1.67528e+08	1.50524e+07	3.91976e+07	0	BP:positive regulation of protein autophosphorylation;BP:signal transduction;BP:regulation of protein tyrosine kinase activity;BP:negative regulation of cell migration;BP:Rap protein signal transduction;BP:platelet activation;BP:neutrophil degranulation;BP:platelet aggregationCC:recycling endosome membrane;CC:recycling endosome;CC:specific granule membrane;CC:bicellular tight junction;CC:tertiary…	GO:0031954;GO:0007165;GO:0061097;GO:0030336;GO:0032486;GO:0030168;GO:0043312;GO:0070527GO:0055038;GO:0055037;GO:0035579;GO:0005923;GO:0070821;GO:0070062;GO:0016020;GO:0044291;GO:0005886;GO:0005829;GO:0045121GO:0005525;GO:0003924;GO:0019003;GO:0019904	K07838	RAP2B	------	------	COG1100	R:General function prediction only
A0A5C2GF64	IG c530_heavy_IGHV3-74_IGHD5-24_IGHJ6 (Fragment) OS=Homo sapiens OX=9606 PE=2 SV=1	5.867	2.553	0.02194	up	yes	93640000	15960000	0	7.23884e+06	1.28404e+07	4.71184e+06	4.77989e+06	2.66118e+06	6.05019e+07	9.98505e+06	0	0	0	1.4729e+07	0	1.03008e+07	2.3276e+07	4.1866e+06	6.78162e+07	8.89389e+06	0	4.16214e+06	3.31852e+06	2.79929e+07	5.76164e+07	0	3.67597e+07	2.24409e+07	2.64933e+06	2.18878e+08	0	8.0007e+07	3.6717e+08	2.92823e+07	0	------	------	------	------	------	------	------	------
B3KY78	cDNA FLJ46304 fis, clone TESTI4037949, highly similar to Kelch-like protein 8 OS=Homo sapiens OX=9606 PE=2 SV=1	0.3246	-1.623	0.03735	down	yes	26300000	81030000	9.43658e+06	1.90624e+08	2.16736e+07	0	1.81031e+08	9.63165e+07	0	1.26598e+08	0	0	0	4.25261e+07	0	0	1.27368e+07	5.09079e+07	0	1.2597e+08	9.33928e+06	1.05248e+08	0	1.37468e+07	0	0	5.29268e+06	3.08083e+06	0	5.14498e+07	4.6702e+07	1.09379e+07	5.79113e+07	2.13155e+07	0	BP:protein ubiquitination;BP:ubiquitin-dependent protein catabolic processCC:nucleoplasm;CC:Cul3-RING ubiquitin ligase complex	GO:0016567;GO:0006511GO:0005654;GO:0031463	K10446	KLHL8	------	------	------	------
Q8WUY1	Protein THEM6 OS=Homo sapiens OX=9606 GN=THEM6 PE=1 SV=2	1.939	0.9553	0.04565	up	yes	69860000	36020000	3.85572e+07	7.05599e+07	9.48752e+06	0	1.39986e+07	1.29153e+08	0	1.24466e+07	4.96097e+06	2.54196e+06	0	6.86612e+07	2.54491e+07	2.92588e+06	1.01806e+08	5.53118e+06	4.57828e+07	2.38782e+07	0	5.40627e+07	2.58083e+06	0	0	9.61965e+07	0	7.63719e+07	8.57732e+07	2.03069e+07	4.86056e+07	1.28376e+08	7.59051e+07	2.73533e+07	0	CC:extracellular region	GO:0005576	------	------	------	------	------	------
A0A5C2GNC4	IG c742_light_IGKV1-5_IGKJ1 (Fragment) OS=Homo sapiens OX=9606 PE=2 SV=1	2.026	1.019	0.03164	up	yes	70650000	34880000	0	0	0	0	0	8.99295e+06	1.84656e+07	0	2.44349e+07	2.50745e+07	5.61307e+07	1.77959e+07	0	1.26215e+08	0	1.82537e+07	4.59836e+07	1.03786e+07	0	1.51813e+07	5.17047e+07	9.68482e+07	7.64902e+07	8.75961e+06	9.93495e+07	0	0	7.90708e+07	1.21487e+08	3.32205e+07	0	3.13351e+07	8.92812e+07	------	------	------	------	------	------	------	------
A0A2S1PH16	Methylmalonyl-CoA mutase variant c.613_615delGAA OS=Homo sapiens OX=9606 GN=MUT PE=2 SV=1	1.84	0.8797	0.03913	up	yes	68070000	36990000	5.39114e+07	5.4105e+07	3.01458e+07	4.49431e+07	3.52577e+07	1.43511e+08	0	1.08616e+07	0	2.93164e+07	3.54224e+06	9.18144e+06	3.67211e+07	4.32351e+06	4.71414e+07	1.884e+07	2.62287e+07	7.245e+07	1.78098e+07	3.9208e+07	2.5365e+07	9.24552e+06	1.67958e+08	9.19507e+07	6.23215e+07	1.04329e+08	7.17983e+07	0	3.94446e+07	2.87051e+07	5.81133e+07	4.68333e+07	0	BP:homocysteine metabolic process;BP:cobalamin metabolic process;BP:positive regulation of GTPase activity;BP:post-embryonic development;BP:short-chain fatty acid catabolic processCC:mitochondrion;CC:mitochondrial matrixMF:cobalamin binding;MF:methylmalonyl-CoA mutase activity;MF:modified amino acid binding;MF:GTPase activity;MF:metal ion binding;MF:identical protein binding;MF:protein homodimeri…	GO:0050667;GO:0009235;GO:0043547;GO:0009791;GO:0019626GO:0005739;GO:0005759GO:0031419;GO:0004494;GO:0072341;GO:0003924;GO:0046872;GO:0042802;GO:0042803	K01847	MUT	hsa01200;hsa00280;hsa00630;hsa00640	Carbon metabolism;Valine, leucine and isoleucine degradation;Glyoxylate and dicarboxylate metabolism;Propanoate metabolism	COG1884;COG2185	I:Lipid transport and metabolism;
A0A5C2G5S1	IGH c299_heavy__IGHV4-59_IGHD5-24_IGHJ6 (Fragment) OS=Homo sapiens OX=9606 PE=2 SV=1	2.909	1.541	0.01298	up	yes	77870000	26770000	1.46975e+07	0	7.20628e+06	0	3.2453e+07	2.35606e+07	4.0357e+07	7.72026e+07	3.92907e+06	9.54215e+06	1.78569e+07	5.7478e+07	1.01813e+07	7.22692e+07	1.57526e+06	3.49854e+06	0	0	1.40768e+07	2.72496e+07	4.20408e+07	1.63875e+07	8.04271e+07	1.38386e+07	0	0	1.79311e+07	2.23136e+08	7.46896e+07	3.35987e+07	0	1.64916e+08	7.59025e+07	------	------	------	------	------	------	------	------
A0A125QYY9	IBM-B2 heavy chain variable region (Fragment) OS=Homo sapiens OX=9606 PE=2 SV=1	2.031	1.022	0.04949	up	yes	66500000	32750000	2.51407e+07	1.73683e+07	1.54365e+07	0	2.18682e+07	2.02987e+07	1.2831e+08	3.21652e+07	2.46547e+07	2.60856e+07	8.5956e+06	1.81634e+07	5.95167e+07	6.31286e+07	1.41303e+07	8.463e+06	8.94621e+07	2.22975e+07	1.31166e+07	2.14795e+06	4.45738e+07	2.05657e+08	1.06589e+08	6.39948e+06	1.39142e+07	2.95154e+07	6.82603e+07	0	4.98765e+07	4.51746e+07	1.41418e+08	4.01552e+07	2.45309e+07	------	------	------	------	------	------	------	------
A0A5C2GR15	IG c81_heavy_IGHV3-15_IGHD3-22_IGHJ4 (Fragment) OS=Homo sapiens OX=9606 PE=2 SV=1	2.467	1.303	0.008321	up	yes	68620000	27810000	1.96552e+07	1.7395e+07	3.39162e+06	0	6.24076e+06	1.72255e+07	3.03351e+07	4.25663e+07	1.13841e+08	1.1121e+07	8.2447e+07	1.074e+07	0	6.42582e+07	7.48189e+06	1.31481e+07	1.22131e+07	2.63853e+07	1.38168e+07	9.68027e+06	2.63575e+07	1.17812e+08	4.85299e+07	0	2.57915e+07	0	0	4.88797e+07	9.23516e+07	0	0	7.83547e+07	0	------	------	------	------	------	------	------	------
A0A5C2G6B6	IGH c217_heavy__IGHV3-33_IGHD6-19_IGHJ4 (Fragment) OS=Homo sapiens OX=9606 PE=2 SV=1	2.182	1.126	0.02819	up	yes	65530000	30030000	3.37277e+07	2.73026e+07	0	0	0	0	0	5.95882e+07	2.08186e+06	9.34749e+06	0	0	0	1.14252e+08	1.03536e+07	0	1.32486e+07	2.43506e+07	4.3818e+06	0	3.16924e+07	9.05129e+07	3.15663e+07	0	9.90859e+07	0	1.49936e+07	9.54094e+07	5.64834e+07	0	3.57186e+07	5.82578e+07	1.07732e+08	------	------	------	------	------	------	------	------
Q12846	Syntaxin-4 OS=Homo sapiens OX=9606 GN=STX4 PE=1 SV=2	0.487	-1.038	0.04074	down	yes	31290000	64250000	7.26688e+07	0	8.16319e+07	0	0	1.40511e+07	1.75347e+07	0	0	8.19073e+07	0	0	8.81352e+07	0	1.22797e+08	9.26854e+07	6.37146e+07	3.33284e+07	2.39842e+07	0	7.85325e+07	4.63338e+07	0	0	1.30502e+07	9.97153e+07	0	1.65368e+07	6.13054e+06	2.62406e+07	2.32523e+07	1.90828e+07	0	BP:positive regulation of insulin secretion involved in cellular response to glucose stimulus;BP:exocytosis;BP:cytokine-mediated signaling pathway;BP:vesicle fusion;BP:regulation of extrinsic apoptotic signaling pathway via death domain receptors;BP:positive regulation of chemotaxis;BP:positive regulation of immunoglobulin secretion;BP:positive regulation of catalytic activity;BP:positive regulat…	GO:0035774;GO:0006887;GO:0019221;GO:0006906;GO:1902041;GO:0050921;GO:0051024;GO:0043085;GO:0045785;GO:2000010;GO:0017157;GO:0008284;GO:0030335;GO:1903078;GO:0048278;GO:0006892;GO:1990668;GO:0060291;GO:0071346;GO:0043311;GO:0031629;GO:0048284;GO:0033194;GO:0006886;GO:0035493GO:0008021;GO:0045202;GO:0031201;GO:0000322;GO:0016020;GO:0070062;GO:0005773;GO:0048787;GO:0035749;GO:0048471;GO:0005802;GO:0…	K13502	STX4	hsa04962;hsa04130	Vasopressin-regulated water reabsorption;SNARE interactions in vesicular transport	COG5074	U:Intracellular trafficking, secretion, and vesicular transport
A0A5C2G1M0	IGL c233_light_IGLV3-19_IGLJ2 (Fragment) OS=Homo sapiens OX=9606 PE=2 SV=1	3.687	1.882	0.04549	up	yes	74560000	20220000	0	1.92688e+07	0	3.2709e+06	2.06299e+07	1.02978e+07	6.62057e+06	0	1.33845e+07	9.17291e+06	4.06884e+06	4.14762e+07	0	3.44147e+07	0	3.1832e+07	0	0	0	3.90103e+07	2.93544e+07	5.17013e+07	7.49442e+07	0	2.63348e+07	0	0	0	1.57263e+07	2.37765e+07	0	5.28901e+07	2.76515e+08	------	------	------	------	------	------	------	------
Q59GE1	H5 variant (Fragment) OS=Homo sapiens OX=9606 PE=2 SV=1	3.235	1.694	0.03495	up	yes	71860000	22210000	1.08865e+07	1.88647e+07	0	7.12453e+06	2.74192e+06	2.47727e+07	1.34066e+07	0	0	3.30065e+07	0	2.0833e+07	4.06311e+07	0	8.589e+07	0	0	2.09995e+06	0	6.24993e+06	0	0	0	1.5847e+07	1.12237e+08	1.82478e+08	3.55418e+07	0	1.08264e+07	1.33139e+08	0	1.29619e+07	0	BP:adult behavior;BP:social behavior;BP:cell cycle;BP:cell division;BP:regulation of exocytosisCC:synaptic vesicle;CC:septin complex;CC:presynapse;CC:plasma membraneMF:GTP binding	GO:0030534;GO:0035176;GO:0007049;GO:0051301;GO:0017157GO:0008021;GO:0031105;GO:0098793;GO:0005886GO:0005525	------	------	------	------	COG5019;COG5019	D:Cell cycle control, cell division, chromosome partitioning;Z:Cytoskeleton
A0A5C2FZU5	IGL c2538_light_IGLV2-23_IGLJ3 (Fragment) OS=Homo sapiens OX=9606 PE=2 SV=1	3.265	1.707	0.01237	up	yes	70950000	21730000	0	8.21329e+06	0	0	5.46081e+06	4.73783e+06	4.37361e+07	1.14754e+07	3.40958e+07	0	5.51562e+07	4.55718e+06	0	6.19054e+07	0	1.68704e+07	0	3.84834e+06	0	1.06527e+07	0	3.51155e+07	1.59703e+08	0	1.00402e+08	0	0	0	3.62876e+06	0	8.64718e+07	1.67454e+07	9.46019e+07	------	------	------	------	------	------	------	------
A2MYD1	V4-4 protein (Fragment) OS=Homo sapiens OX=9606 GN=V4-4 PE=4 SV=1	1.965	0.9745	0.04247	up	yes	60730000	30900000	0	1.34875e+07	0	0	5.61643e+07	3.91233e+07	3.68945e+07	2.99242e+06	0	0	1.12016e+08	1.56669e+07	1.78962e+07	1.70469e+07	1.7651e+07	3.485e+07	1.87111e+07	0	0	1.925e+07	0	0	9.39521e+07	5.05752e+07	8.72709e+07	4.67062e+07	5.97608e+07	0	0	2.32252e+07	0	1.36806e+07	1.1065e+08	------	------	------	------	------	------	------	------
O76003	Glutaredoxin-3 OS=Homo sapiens OX=9606 GN=GLRX3 PE=1 SV=2	1.745	0.8032	0.02226	up	yes	58220000	33370000	5.62146e+07	7.11157e+07	4.04673e+07	8.82929e+06	2.04631e+07	9.86121e+06	1.92128e+07	2.2845e+07	0	3.81308e+07	0	0	6.83256e+07	4.94246e+07	5.08931e+07	5.45508e+06	1.90226e+07	2.10058e+07	1.51207e+07	6.8109e+07	1.6242e+07	9.70763e+07	2.53732e+07	4.38595e+07	3.77818e+07	9.60717e+07	7.84855e+07	9.89194e+07	0	2.29174e+07	6.70337e+07	5.17423e+06	6.77491e+07	BP:protein maturation by iron-sulfur cluster transfer;BP:cellular iron ion homeostasis;BP:negative regulation of cardiac muscle hypertrophy;BP:regulation of the force of heart contraction;BP:[2Fe-2S] cluster assembly;BP:cell redox homeostasisCC:cytosol;CC:dendrite;CC:cell;CC:cell cortex;CC:nucleus;CC:Z discMF:protein kinase C binding;MF:iron-sulfur cluster binding;MF:glutathione disulfide oxidore…	GO:0097428;GO:0006879;GO:0010614;GO:0002026;GO:0044571;GO:0045454GO:0005829;GO:0030425;GO:0005623;GO:0005938;GO:0005634;GO:0030018GO:0005080;GO:0051536;GO:0015038;GO:0042802;GO:0009055;GO:0046872;GO:0015035;GO:0003723	------	------	------	------	COG0278	O:Posttranslational modification, protein turnover, chaperones
A0A5C2FZP6	IGL c747_light_IGKV1-39_IGKJ2 (Fragment) OS=Homo sapiens OX=9606 PE=2 SV=1	2.074	1.052	0.0392	up	yes	56470000	27230000	0	8.5111e+06	0	0	9.27734e+06	0	1.10879e+07	6.92629e+06	0	3.06787e+07	2.72874e+07	4.86461e+07	0	3.63887e+07	3.80835e+07	3.05024e+07	0	0	0	0	5.21545e+07	6.36081e+06	9.16559e+07	0	8.75921e+07	0	0	4.47574e+07	0	9.91644e+06	1.00413e+08	5.46267e+07	0	------	------	------	------	------	------	------	------
P19474	E3 ubiquitin-protein ligase TRIM21 OS=Homo sapiens OX=9606 GN=TRIM21 PE=1 SV=1	3.323	1.732	0.01851	up	yes	64270000	19340000	9.98942e+06	6.77263e+06	0	2.63677e+07	3.33123e+07	3.04099e+07	0	1.18977e+07	1.90722e+06	2.84132e+07	0	1.73763e+07	6.71324e+07	0	3.46943e+07	0	0	1.01112e+07	2.82878e+06	6.16902e+06	2.68701e+06	0	5.57157e+06	9.35192e+06	0	5.35929e+07	5.61124e+07	2.02829e+08	6.22572e+07	1.05204e+08	0	1.92557e+07	0	BP:negative regulation of protein deubiquitination;BP:negative regulation of viral release from host cell;BP:protein polyubiquitination;BP:positive regulation of viral entry into host cell;BP:positive regulation of cell cycle;BP:protein ubiquitination;BP:positive regulation of autophagy;BP:cell cycle;BP:protein trimerization;BP:innate immune response;BP:response to interferon-gamma;BP:interferon-…	GO:0090086;GO:1902187;GO:0000209;GO:0046598;GO:0045787;GO:0016567;GO:0010508;GO:0007049;GO:0070206;GO:0045087;GO:0034341;GO:0060333;GO:0032897;GO:0051091;GO:0031648;GO:0032088;GO:0006513;GO:0051865;GO:0032479GO:1990904;GO:0005737;GO:0031410;GO:0005634;GO:0005776;GO:0005654;GO:0019005;GO:0005829;GO:0000932GO:0008270;GO:0003677;GO:0042802;GO:0004842;GO:0003723	K10651	TRIM21, SSA1	hsa05322	Systemic lupus erythematosus	------	------
O14933	Ubiquitin/ISG15-conjugating enzyme E2 L6 OS=Homo sapiens OX=9606 GN=UBE2L6 PE=1 SV=4	0.2949	-1.762	0.01917	down	yes	18270000	61950000	9.29601e+07	0	6.77931e+06	0	8.76076e+06	8.10767e+06	0	9.60249e+07	0	8.17982e+07	0	1.91829e+08	8.50434e+07	1.39134e+07	3.78848e+07	0	8.42075e+07	0	0	3.61304e+07	0	2.37752e+07	8.17665e+06	5.42755e+06	0	4.58767e+06	1.10167e+07	6.41129e+07	2.08802e+07	2.80827e+07	1.6014e+07	1.60274e+07	2.86939e+06	BP:cellular protein metabolic process;BP:ISG15-protein conjugation;BP:negative regulation of type I interferon production;BP:translesion synthesis;BP:cellular protein modification process;BP:ubiquitin-dependent protein catabolic processCC:cytosol;CC:ubiquitin ligase complex;CC:nucleoplasmMF:ubiquitin protein ligase binding;MF:ISG15 transferase activity;MF:ubiquitin binding;MF:ubiquitin-protein tr…	GO:0044267;GO:0032020;GO:0032480;GO:0019985;GO:0006464;GO:0006511GO:0005829;GO:0000151;GO:0005654GO:0031625;GO:0042296;GO:0043130;GO:0004842;GO:0061631;GO:0005524	K04553	UBE2L6, UBCH8	hsa05012;hsa04120	Parkinson's disease;Ubiquitin mediated proteolysis	COG5078	O:Posttranslational modification, protein turnover, chaperones
A0A5C2GM65	IG c231_light_IGLV1-47_IGLJ2 (Fragment) OS=Homo sapiens OX=9606 PE=2 SV=1	3.019	1.594	0.04853	up	yes	57330000	18990000	2.69814e+07	5.4352e+06	0	0	0	0	1.43387e+07	6.53202e+06	2.09179e+07	1.35424e+07	0	1.10385e+07	0	8.19271e+07	0	9.58157e+06	6.49239e+06	3.69221e+06	0	0	2.74037e+07	1.18556e+08	1.52371e+08	0	5.01176e+07	0	4.13324e+06	0	0	0	1.83058e+07	4.65983e+07	1.12193e+07	------	------	------	------	------	------	------	------
A0A5C2GIF2	IG c198_heavy_IGHV5-51_IGHD7-27_IGHJ6 (Fragment) OS=Homo sapiens OX=9606 PE=2 SV=1	2.862	1.517	0.01541	up	yes	56240000	19650000	0	1.90284e+07	0	9.15697e+06	1.74409e+07	0	2.42604e+07	1.40973e+07	0	1.52202e+07	8.2684e+06	0	0	6.46397e+07	0	1.53179e+07	1.17904e+07	1.85083e+07	1.71012e+07	0	2.06784e+07	7.86802e+07	4.09667e+07	0	5.59556e+07	2.19753e+07	1.0984e+07	1.30601e+07	3.39664e+07	5.44012e+07	1.84489e+08	5.28932e+07	7.13031e+07	------	------	------	------	------	------	------	------
B9EG90	DNA topoisomerase I OS=Homo sapiens OX=9606 GN=TOP1 PE=2 SV=1	3.608	1.851	0.00928	up	yes	53790000	14910000	1.36956e+07	1.68264e+07	0	0	1.29898e+07	1.47361e+07	0	1.36574e+07	0	0	3.50587e+06	2.3329e+07	5.15162e+06	1.27535e+07	1.26661e+07	2.11113e+07	0	0	0	3.43496e+07	9.05676e+06	0	0	1.66766e+07	2.70623e+07	4.53646e+07	3.98377e+07	0	4.48606e+07	0	1.48968e+08	0	0	BP:circadian regulation of gene expression;BP:peptidyl-serine phosphorylation;BP:phosphorylation;BP:DNA topological change;BP:DNA replication;BP:circadian rhythm;BP:programmed cell death;BP:chromosome segregation;BP:chromatin remodeling;BP:embryonic cleavage;BP:response to drug;BP:viral processCC:DNA topoisomerase comple;CC:nuclear chromosome;CC:perikaryon;CC:nucleus;CC:nucleoplasm;CC:replication…	GO:0032922;GO:0018105;GO:0016310;GO:0006265;GO:0006260;GO:0007623;GO:0012501;GO:0007059;GO:0006338;GO:0040016;GO:0042493;GO:0016032GO:0009330;GO:0000228;GO:0043204;GO:0005634;GO:0005654;GO:0031298;GO:0005694;GO:0001650;GO:0000932;GO:0032993;GO:0005730GO:0003917;GO:0003677;GO:0097100;GO:0004674;GO:0003690;GO:0003697;GO:0005524;GO:0019904;GO:0003723;GO:0000978;GO:0003682	K03163	TOP1	------	------	COG3569	L:Replication, recombination and repair
A0A5C2FYI6	IGL c1982_light_IGLV2-23_IGLJ2 (Fragment) OS=Homo sapiens OX=9606 PE=2 SV=1	2.721	1.444	0.01933	up	yes	45470000	16710000	6.07291e+07	5.32838e+06	2.02436e+06	2.10277e+07	3.85973e+06	3.05599e+06	8.18267e+06	6.7821e+06	3.47079e+07	0	1.17484e+07	2.88754e+07	0	5.14398e+07	0	0	0	2.42075e+06	0	1.2023e+06	9.22255e+06	2.95963e+07	5.63728e+07	0	2.47271e+07	7.6037e+06	4.93053e+07	8.89275e+07	0	0	1.1787e+08	1.07544e+07	2.40658e+07	------	------	------	------	------	------	------	------
A0A5C2G4Z6	IGL c4004_light_IGLV1-40_IGLJ2 (Fragment) OS=Homo sapiens OX=9606 PE=2 SV=1	3.329	1.735	0.03343	up	yes	46670000	14020000	2.46777e+07	2.75413e+06	6.95114e+06	1.41505e+07	0	0	5.73236e+07	3.80943e+06	9.08281e+06	0	2.18804e+07	0	0	0	0	4.72133e+06	0	2.49056e+06	0	0	6.40281e+06	8.69876e+07	0	0	0	7.76704e+06	1.25417e+08	3.21683e+07	0	1.71601e+07	5.74442e+06	2.74926e+07	7.06045e+07	------	------	------	------	------	------	------	------
A0A5C2GHH8	IG c363_heavy_IGHV4-34_IGHD5-18_IGHJ4 (Fragment) OS=Homo sapiens OX=9606 PE=2 SV=1	2.718	1.443	0.02858	up	yes	44080000	16220000	4.61516e+07	3.42004e+06	2.52921e+06	0	1.12444e+07	8.38929e+06	9.66686e+06	2.84207e+07	2.4747e+06	0	0	0	0	7.89083e+07	0	4.70252e+06	1.34693e+07	1.23312e+07	1.71987e+06	0	3.62125e+06	6.23451e+07	7.14281e+07	4.54943e+06	5.98437e+07	1.17814e+07	2.2963e+07	9.88339e+07	3.19154e+07	1.02403e+07	1.76538e+07	1.2087e+08	1.65863e+07	------	------	------	------	------	------	------	------
A0A5C2G5Z8	IGH c379_heavy__IGHV4-39_IGHD7-27_IGHJ4 (Fragment) OS=Homo sapiens OX=9606 PE=2 SV=1	2.709	1.438	0.008228	up	yes	43450000	16040000	0	5.37854e+06	1.19849e+07	2.76894e+07	0	1.28235e+07	0	1.54986e+07	7.73548e+06	8.41367e+06	0	0	7.75865e+06	7.05315e+07	0	0	0	1.14744e+07	1.86751e+06	0	1.12805e+07	4.36348e+07	1.27623e+07	0	1.58972e+07	4.57217e+07	9.16264e+06	5.98455e+07	5.48323e+07	5.2689e+07	0	9.31042e+07	4.68007e+07	------	------	------	------	------	------	------	------
Q16718	NADH dehydrogenase [ubiquinone] 1 alpha subcomplex subunit 5 OS=Homo sapiens OX=9606 GN=NDUFA5 PE=1 SV=3	2.161	1.112	0.03492	up	yes	40380000	18690000	6.62341e+07	1.2376e+07	9.4333e+06	0	0	9.30221e+06	0	1.43843e+07	0	1.64299e+07	0	1.44582e+07	0	1.59877e+07	5.69337e+07	4.63222e+06	0	1.26079e+07	1.61097e+07	8.76402e+06	4.02485e+06	0	8.35174e+07	2.70302e+07	0	5.38481e+07	4.93274e+07	0	9.57796e+06	2.40698e+07	0	3.5285e+07	0	BP:mitochondrial respiratory chain complex I assembly;BP:mitochondrial electron transport, NADH to ubiquinone;BP:respiratory electron transport chainCC:mitochondrial inner membrane;CC:mitochondrial respiratory chain complex IMF:NADH dehydrogenas	GO:0032981;GO:0006120;GO:0022904GO:0005743;GO:0005747GO:0008137	K03949	NDUFA5	hsa00190;hsa04723;hsa04932;hsa05016;hsa05010;hsa05012	Oxidative phosphorylation;Retrograde endocannabinoid signaling;Non-alcoholic fatty liver diseas;Huntington's disease;Alzheimer's disease;Parkinson's disease	------	------
A0A1B0GV96	Uncharacterized protein OS=Homo sapiens OX=9606 PE=1 SV=1	1.591	0.6699	0.01602	up	yes	35830000	22520000	0	1.5698e+07	1.08738e+07	1.78683e+07	0	0	3.47108e+07	2.20297e+07	2.13117e+07	7.54163e+06	4.38016e+07	0	1.36227e+07	3.38494e+07	0	0	1.31793e+07	2.17611e+07	0	3.50312e+07	2.39594e+07	3.46708e+07	5.89749e+07	2.88139e+07	4.30881e+07	0	3.22891e+07	3.71926e+07	0	8.03111e+06	0	3.57836e+07	4.36374e+07	------	------	------	------	------	------	------	------
Q9BTZ2	Dehydrogenase/reductase SDR family member 4 OS=Homo sapiens OX=9606 GN=DHRS4 PE=1 SV=3	2.761	1.465	0.01159	up	yes	42570000	15420000	7.20009e+06	6.60846e+06	1.15704e+07	6.8865e+06	3.41114e+07	0	0	5.26573e+06	0	1.40013e+07	5.16116e+06	7.1934e+06	2.08304e+06	0	1.4143e+07	0	0	3.01849e+07	3.03367e+07	4.1106e+07	0	0	0	2.78993e+07	0	2.38467e+07	2.05749e+07	0	1.06725e+08	6.46706e+07	3.44918e+07	1.97823e+07	0	BP:cellular ketone metabolic process;BP:steroid metabolic process;BP:protein targeting to peroxisome;BP:protein tetramerization;BP:alcohol metabolic process;BP:oxidation-reduction processCC:peroxisomal membrane;CC:cytosol;CC:peroxisome;CC:endoplasmic reticulum membrane;CC:mitochondrion;CC:peroxisomal matrix;CC:nucleusMF:3-keto sterol reductase activity;MF:oxidoreductase activity, acting on NA;MF:…	GO:0042180;GO:0008202;GO:0006625;GO:0051262;GO:0006066;GO:0055114GO:0005778;GO:0005829;GO:0005777;GO:0005789;GO:0005739;GO:0005782;GO:0005634GO:0000253;GO:0016655;GO:0004090;GO:0018455;GO:0005102;GO:0016491	K11147	DHRS4	hsa00830;hsa04146	Retinol metabolism;Peroxisome	COG1028;COG1028	Q:Secondary metabolites biosynthesis, transport and catabolism;I:Lipid transport and metabolism
Q9H7D0	Dedicator of cytokinesis protein 5 OS=Homo sapiens OX=9606 GN=DOCK5 PE=1 SV=3	3.059	1.613	0.02361	up	yes	43280000	14150000	0	2.41326e+06	0	7.00331e+06	7.97937e+06	9.30495e+06	0	0	7.031e+06	0	4.26247e+07	3.82566e+06	5.52134e+07	5.49589e+06	1.57971e+07	0	0	0	9.03274e+06	1.24719e+07	5.76771e+06	0	1.38569e+07	1.1097e+07	0	6.98158e+07	6.93705e+06	0	0	7.55993e+07	8.23448e+07	0	0	BP:positive regulation of epithelial cell migration;BP:cell migration;BP:positive regulation of substrate adhesion-dependent cell spreading;BP:positive regulation of vascular associated smooth muscle cell migration;BP:small GTPase mediated signal transduction;BP:negative regulation of vascular smooth muscle contractionCC:cytoplasm;CC:cytosol;CC:plasma membraneMF:guanyl-nucleotide exchange factor …	GO:0010634;GO:0016477;GO:1900026;GO:1904754;GO:0007264;GO:1904694GO:0005737;GO:0005829;GO:0005886GO:0005085;GO:0005096	K17707	DOCK5	------	------	------	------
Q9UKU7	Isobutyryl-CoA dehydrogenase, mitochondrial OS=Homo sapiens OX=9606 GN=ACAD8 PE=1 SV=1	3.322	1.732	0.03868	up	yes	42020000	12650000	0	1.17602e+07	1.74664e+07	0	1.75167e+07	1.83986e+07	0	6.43489e+06	0	1.28751e+07	0	0	8.89453e+06	0	7.62372e+06	8.84235e+06	0	2.45696e+07	7.45839e+06	1.13725e+07	1.12958e+07	5.41085e+06	0	2.01845e+07	1.38517e+08	0	0	0	3.18835e+07	3.13261e+07	0	2.48123e+07	0	BP:valine catabolic process;BP:lipid metabolic process;BP:branched-chain amino acid catabolic processCC:mitochondrial matrixMF:flavin adenine dinucleotide binding;MF:acyl-CoA dehydrogenase activity	GO:0006574;GO:0006629;GO:0009083GO:0005759GO:0050660;GO:0003995	K11538	ACAD8	hsa00280	Valine, leucine and isoleucine degradation	COG1960	I:Lipid transport and metabolism
A0A5C2GC55	IGL c3883_light_IGLV2-11_IGLJ2 (Fragment) OS=Homo sapiens OX=9606 PE=2 SV=1	2.713	1.44	0.006298	up	yes	35590000	13120000	1.51518e+07	6.21945e+06	0	0	2.41995e+07	2.12883e+07	0	0	6.96884e+06	1.29923e+07	7.97096e+06	1.14236e+07	0	5.00827e+06	0	3.0029e+07	0	3.07158e+06	0	0	0	4.65812e+07	6.77083e+07	3.19925e+07	0	5.15813e+07	4.62462e+06	0	0	0	0	1.78904e+07	2.87682e+07	------	------	------	------	------	------	------	------
F5H5P2	2-oxoisovalerate dehydrogenase subunit alpha OS=Homo sapiens OX=9606 PE=3 SV=1	1.969	0.9775	0.01285	up	yes	32000000	16250000	1.02903e+07	3.92852e+07	1.57864e+07	0	1.53079e+07	1.74256e+07	1.82069e+07	2.07202e+07	0	0	1.02672e+07	0	7.37388e+06	4.10996e+06	1.61859e+07	1.03529e+07	0	3.92176e+07	7.57284e+06	2.00336e+07	7.90556e+06	5.99286e+06	1.52642e+07	4.013e+07	2.15238e+07	4.98745e+07	7.04924e+07	1.39964e+07	4.47279e+07	1.64767e+07	2.35763e+07	4.99791e+07	0	BP:branched-chain amino acid catabolic processCC:mitochondrial alpha-ketoglutarate dehydrogenase complex;CC:mitochondrion;CC:mitochondrial matrixMF:carboxy-lyase activity;MF:alpha-ketoacid dehydrogenase activity;MF:3-methyl-2-oxobutanoate dehydrogenas;MF:metal ion binding	GO:0009083GO:0005947;GO:0005739;GO:0005759GO:0016831;GO:0003826;GO:0003863;GO:0046872	K00166	BCKDHA, bkdA1	hsa00280;hsa00640	Valine, leucine and isoleucine degradation;Propanoate metabolism	COG1071	C:Energy production and conversion
A0A384MDZ8	Epididymis secretory sperm binding protein OS=Homo sapiens OX=9606 PE=2 SV=1	0.2607	-1.94	0.008273	down	yes	9861000	37830000	1.97675e+07	2.27885e+07	7.54174e+07	6.63432e+07	5.53851e+07	1.62884e+07	0	5.6225e+07	0	1.01776e+07	2.3269e+07	7.46362e+07	0	3.68176e+06	1.86786e+07	5.56479e+07	0	4.51229e+07	1.76896e+07	6.8594e+07	1.3375e+07	1.3724e+07	0	7.42275e+06	0	8.41146e+06	1.35874e+07	0	7.89094e+06	0	0	1.19674e+07	6.01994e+06	BP:cellular aldehyde metabolic process;BP:sensory perception of sound;BP:lysine catabolic process;BP:choline catabolic process;BP:glycine betaine biosynthetic process from cholineCC:extracellular exosome;CC:nucleus;CC:mitochondrion;CC:mitochondrial matrix;CC:cytosolMF:L-aminoadipate-semialdehyde dehydrogenase activity;MF:betaine-aldehyde dehydrogenase activity;MF:glyceraldehyde-3-phosphate dehydr…	GO:0006081;GO:0007605;GO:0006554;GO:0042426;GO:0019285GO:0070062;GO:0005634;GO:0005739;GO:0005759;GO:0005829GO:0004043;GO:0008802;GO:0043878;GO:0016620;GO:0004029	K14085	ALDH7A1	hsa00310;hsa00561;hsa00300;hsa00380;hsa00330;hsa00620;hsa00410;hsa00071;hsa01230;hsa00280;hsa00053;hsa00260;hsa00010;hsa00340	Lysine degradation;Glycerolipid metabolism;Lysine biosynthesis;Tryptophan metabolism;Arginine and proline metabolism;Pyruvate metabolism;beta-Alanine metabolism;Fatty acid degradation;Biosynthesis of amino acids;Valine, leucine and isoleucine degradation;Ascorbate and aldarate metabolism;Glycine, serine and threonine metabolism;Glycolysis / Gluconeogenesis;Histidine metabolism	COG1012	C:Energy production and conversion
B3KP25	cDNA FLJ31014 fis, clone HLUNG2000255, highly similar to Protease serine 27 OS=Homo sapiens OX=9606 PE=2 SV=1	0.3766	-1.409	0.0354	down	yes	12950000	34390000	1.54188e+07	4.97036e+07	2.99359e+07	0	1.13385e+07	0	4.34054e+07	5.46307e+07	1.04809e+07	5.6404e+07	4.6425e+06	0	0	2.20992e+07	6.19366e+07	1.07495e+07	0	2.80894e+07	4.1411e+07	9.63689e+06	1.00423e+08	4.53258e+06	2.35307e+07	1.59897e+07	0	2.14388e+07	2.38352e+07	0	2.01811e+06	0	1.04405e+07	1.78621e+06	0	CC:extrinsic component of plasma membrane;CC:extracellular region;CC:anchored component of plasma membraneMF:serine-type endopeptidase activity	GO:0019897;GO:0005576;GO:0046658GO:0004252	K09628	PRSS27	------	------	COG5640	O:Posttranslational modification, protein turnover, chaperones
P26006	Integrin alpha-3 OS=Homo sapiens OX=9606 GN=ITGA3 PE=1 SV=5	2.454	1.295	0.01259	up	yes	32960000	13430000	0	3.31342e+07	2.32648e+07	1.53964e+07	9.65052e+06	1.5998e+07	1.95768e+07	1.00381e+07	9.88677e+06	1.04446e+07	5.98812e+06	0	0	6.61449e+06	9.63954e+06	4.66075e+06	0	1.10957e+07	0	1.13317e+07	1.8203e+07	6.9999e+07	2.1512e+07	1.718e+07	1.24175e+07	0	2.39767e+07	1.95578e+07	8.81191e+07	8.41267e+06	3.54203e+07	0	0	BP:lung development;BP:memory;BP:negative regulation of Rho protein signal transduction;BP:leukocyte migration;BP:positive regulation of gene expression;BP:neuron migration;BP:maternal process involved in female pregnancy;BP:regulation of BMP signaling pathway;BP:negative regulation of cell projection organization;BP:dendritic spine maintenance;BP:renal filtration;BP:exploration behavior;BP:extra…	GO:0030324;GO:0007613;GO:0035024;GO:0050900;GO:0010628;GO:0001764;GO:0060135;GO:0030510;GO:0031345;GO:0097062;GO:0097205;GO:0035640;GO:0030198;GO:0034698;GO:1903078;GO:0048333;GO:0010811;GO:0017015;GO:0007155;GO:0072006;GO:0010634;GO:0007507;GO:0007229;GO:0042493;GO:0030111;GO:0043588;GO:0007160;GO:0010976GO:0009897;GO:0060076;GO:0005925;GO:0034667;GO:1990812;GO:0071438;GO:0048471;GO:0097060;GO:0…	K06482	ITGA3, CD49c	hsa04510;hsa05200;hsa04512;hsa05222;hsa04640;hsa05410;hsa05412;hsa04151;hsa05414;hsa04810	Focal adhesion;Pathways in cancer;ECM-receptor interaction;Small cell lung cancer;Hematopoietic cell lineage;Hypertrophic cardiomyopath;Arrhythmogenic right ventricular cardiomyopath;PI3K-Akt signaling pathway;Dilated cardiomyopathy;Regulation of actin cytoskeleton	------	------
A0A5C2G1I2	IGL c3148_light_IGKV3-20_IGKJ2 (Fragment) OS=Homo sapiens OX=9606 PE=2 SV=1	2.068	1.048	0.02514	up	yes	31200000	15090000	0	0	0	3.11126e+07	0	9.57268e+06	0	2.15315e+07	0	2.19954e+07	4.78237e+06	2.33262e+07	0	7.42108e+06	8.35412e+06	1.04194e+07	0	2.00211e+07	0	0	7.45785e+06	0	4.7649e+07	4.99445e+07	1.56622e+07	0	0	0	2.65871e+07	2.01167e+07	0	5.30663e+07	5.37494e+06	------	------	------	------	------	------	------	------
A0A5C2GB29	IGH + IGL c302_heavy_IGHV3-23_IGHD3-22_IGHJ5 (Fragment) OS=Homo sapiens OX=9606 PE=2 SV=1	3.559	1.831	0.001382	up	yes	34220000	9616000	0	3.82536e+06	5.47124e+06	0	0	9.16713e+06	1.46428e+07	1.76599e+07	4.83918e+06	4.1484e+06	1.42918e+07	0	0	1.53991e+07	0	6.08444e+06	1.63117e+07	0	0	0	3.55037e+06	0	7.09445e+06	0	0	0	2.46375e+07	6.74663e+07	4.85498e+07	0	0	3.42164e+07	2.33705e+07	------	------	------	------	------	------	------	------
A0A5C2GRB2	IG c1433_heavy_IGHV4-34_IGHD3-16_IGHJ4 (Fragment) OS=Homo sapiens OX=9606 PE=2 SV=1	4.506	2.172	0.000716	up	yes	29390000	6522000	1.62398e+07	1.97919e+06	4.44117e+06	0	4.46e+06	3.59198e+06	0	5.98172e+06	0	8.34775e+06	5.72227e+06	4.21212e+06	0	1.61388e+07	0	0	0	0	0	2.71848e+06	4.42902e+06	1.80308e+07	2.04926e+07	0	6.21544e+06	0	0	3.69629e+07	5.99637e+07	2.96109e+07	0	5.09346e+07	1.29276e+07	------	------	------	------	------	------	------	------
A0A5C2G4S5	IGL c3540_light_IGLV1-40_IGLJ2 (Fragment) OS=Homo sapiens OX=9606 PE=2 SV=1	0.3782	-1.403	0.01353	down	yes	9280000	24540000	0	7.26408e+06	2.85784e+07	2.1708e+07	0	1.92727e+07	3.85764e+07	0	0	0	4.31453e+06	0	0	2.87493e+07	1.70088e+07	4.34146e+07	0	3.2756e+07	7.59158e+06	0	4.52652e+07	0	0	1.16888e+07	0	0	1.93563e+06	1.04092e+07	1.09427e+07	4.58641e+06	9.10027e+06	1.62936e+07	0	------	------	------	------	------	------	------	------
Q96QE2	Proton myo-inositol cotransporter OS=Homo sapiens OX=9606 GN=SLC2A13 PE=1 SV=3	0.4513	-1.148	0.04565	down	yes	9355000	20730000	1.21039e+07	4.7227e+07	3.44095e+07	3.22223e+07	0	2.46685e+07	0	1.48758e+07	3.78684e+06	9.91835e+06	1.47195e+07	1.27345e+07	0	0	2.70554e+06	0	0	3.87438e+07	0	2.58661e+07	1.61755e+07	0	0	0	0	1.31729e+07	5.28345e+06	0	1.16925e+07	3.41528e+06	1.21351e+07	3.58966e+06	1.61977e+07	BP:carbohydrate transport;BP:myo-inositol transportCC:integral component of membrane;CC:integral component of plasma membrane;CC:plasma membraneMF:transmembrane transporter activity;MF:myo-inosito	GO:0008643;GO:0015798GO:0016021;GO:0005887;GO:0005886GO:0022857;GO:0005366	K08150	SLC2A13, ITR	------	------	------	------
A0A5C2GZR4	IG c1879_light_IGLV3-27_IGLJ2 (Fragment) OS=Homo sapiens OX=9606 PE=2 SV=1	2.446	1.29	0.0224	up	yes	18940000	7744000	0	2.80308e+06	0	0	1.56548e+07	0	0	1.01112e+07	5.51245e+06	0	7.01786e+06	5.80452e+06	0	6.19395e+06	0	1.1739e+07	0	0	2.22021e+06	6.21788e+06	1.1911e+07	2.02128e+07	3.04598e+07	0	0	0	3.80538e+06	0	6.43091e+06	0	3.91453e+07	1.36004e+07	0	------	------	------	------	------	------	------	------
A0A024R502	MS4A13 protein, isoform CRA_b OS=Homo sapiens OX=9606 GN=NYD-SP21 PE=4 SV=1	0.05911	-4.08	0.01372	down	yes	892600	15100000	2.08116e+07	0	0	1.94179e+07	0	1.61022e+07	3.48721e+07	68978.4	0	1.97681e+06	0	3.03487e+07	6.22903e+06	0	0	8.97806e+06	0	0	1.18381e+06	2.60687e+07	0	0	2.08923e+06	0	0	0	114923	2.08369e+06	0	80870.3	774167	212841	0	CC:integral component of membrane	GO:0016021	------	------	------	------	------	------
A0A024QZR3	Protein pelota homolog OS=Homo sapiens OX=9606 GN=hCG_2002731 PE=3 SV=1	229	7.8392	0	up	yes	23780000	0	3.54206e+08	1.075e+07	0	0	0	0	0	2.47058e+06	4.71006e+07	6.53702e+06	0	0	1.60362e+08	0	9.87864e+06	0	1.25856e+07	8.17346e+06	0	0	1.60419e+07	0	0	0	6.90984e+07	1.65696e+07	2.29699e+07	0	0	8.11311e+07	6.01548e+07	2.56487e+07	9.82561e+06	BP:positive regulation of BMP signaling pathway;BP:stem cell population maintenance;BP:endoderm development;BP:nuclear-transcribed mRNA catabolic process, no-go decay;BP:chromosome organization;BP:mesenchymal to epithelial transition;BP:inner cell mass cell proliferation;BP:ribosome disassembly;BP:cell division;BP:RNA surveillance;BP:nuclear-transcribed mRNA catabolic process, non-stop decay;BP:c…	GO:0030513;GO:0019827;GO:0007492;GO:0070966;GO:0051276;GO:0060231;GO:0001833;GO:0032790;GO:0051301;GO:0071025;GO:0070481;GO:0007049;GO:0070651GO:0005737;GO:0005634GO:0043022;GO:0004519;GO:0046872	K06965	PELO, DOM34, pelA	hsa03015	mRNA surveillance pathway	COG1537	R:General function prediction only
A0A024R0Y2	HCG30204, isoform CRA_a OS=Homo sapiens OX=9606 GN=hCG_30204 PE=4 SV=1	229	7.8392	0	up	yes	289800000	0	0	1.59324e+07	0	7.42681e+06	2.72458e+07	2.88337e+06	5.60321e+06	0	8.30973e+06	6.129e+06	0	5.81056e+07	7.89335e+06	0	3.32052e+07	0	0	0	0	0	0	8.22084e+06	0	6.65174e+06	0	3.71739e+07	6.12634e+06	3.38597e+09	4.07136e+06	1.40906e+07	9.80688e+06	5.53135e+06	0	BP:acetyl-CoA metabolic process;BP:fatty acid biosynthetic process;BP:carnitine shuttle;BP:protein homotetramerization;BP:protein metabolic process;BP:cellular response to prostaglandin E stimulus;BP:positive regulation of cellular metabolic process;BP:lipid homeostasis;BP:fatty-acyl-CoA biosynthetic process;BP:regulation of cholesterol biosynthetic process;BP:tissue homeostasis;BP:malonyl-CoA bi…	GO:0006084;GO:0006633;GO:0006853;GO:0051289;GO:0019538;GO:0071380;GO:0031325;GO:0055088;GO:0046949;GO:0045540;GO:0001894;GO:2001295GO:0005829;GO:0015629;GO:0001650GO:0016874;GO:0005524;GO:0003989;GO:0004075;GO:0046872;GO:0042802	K11262	ACACA	hsa00620;hsa01212;hsa00061;hsa04910;hsa00640;hsa04152;hsa04922	Pyruvate metabolism;Fatty acid metabolism;Fatty acid biosynthesis;Insulin signaling pathway;Propanoate metabolism;AMPK signaling pathway;Glucagon signaling pathway	COG0511;COG4799;COG0439	I:Lipid transport and metabolism;
A0A024R2N0	Transporter OS=Homo sapiens OX=9606 GN=SLC6A6 PE=3 SV=1	229	7.8392	0	up	yes	8355000	0	0	2.06264e+07	1.18488e+07	0	0	1.43891e+07	0	4.72474e+06	0	9.07847e+06	0	0	0	0	1.6155e+07	0	1.28421e+07	0	0	5.77311e+06	0	4.23613e+07	0	0	0	0	1.52567e+07	0	1.47869e+07	2.56329e+06	0	1.31503e+07	1.21377e+07	BP:amino acid transport;BP:cellular amino acid metabolic process;BP:taurine transport;BP:modulation of synaptic transmissionCC:integral component of plasma membrane;CC:integral component of membrane;CC:integral component of postsynaptic membrane;CC:plasma membrane;CC:GABA-ergic synapseMF:neurotransmitte;MF:taurin;MF:amino acid transmembrane transporter activity	GO:0006865;GO:0006520;GO:0015734;GO:0050804GO:0005887;GO:0016021;GO:0099055;GO:0005886;GO:0098982GO:0005328;GO:0005369;GO:0015171	K05039	SLC6A6S	------	------	COG0733	P:Inorganic ion transport and metabolism
A0A024R8L7	Acyl-coenzyme A oxidase OS=Homo sapiens OX=9606 GN=ACOX1 PE=3 SV=1	229	7.8392	0	up	yes	37130000	0	1.0881e+08	2.16666e+07	5.60297e+06	0	0	8.23121e+06	4.4198e+07	0	1.04063e+07	5.46709e+06	0	0	1.50211e+08	0	8.56e+07	0	0	0	0	0	0	0	0	0	1.42742e+07	1.46451e+08	0	9.6059e+07	0	1.28535e+08	4.73119e+07	1.29103e+07	0	BP:fatty acid beta-oxidation;BP:cholesterol homeostasis;BP:generation of precursor metabolites and energy;BP:peroxisome fission;BP:fatty acid beta-oxidation using acyl-CoA oxidase;BP:lipid metabolic process;BP:regulation of lipid metabolic process;BP:protein targeting to peroxisome;BP:lipid homeostasis;BP:spermatogenesis;BP:alpha-linolenic acid metabolic process;BP:very long-chain fatty acid meta…	GO:0006635;GO:0042632;GO:0006091;GO:0016559;GO:0033540;GO:0006629;GO:0019216;GO:0006625;GO:0055088;GO:0007283;GO:0036109;GO:0000038;GO:0019395;GO:0006693GO:0005778;GO:0005782;GO:0005886;GO:0005730;GO:0005634;GO:0016020;GO:0005777;GO:0005654;GO:0043231;GO:0005829GO:0071949;GO:0050660;GO:0005504;GO:0005102;GO:0047485;GO:0030165;GO:0016401;GO:0003997	K00232	E1.3.3.6, ACOX1, ACOX3	hsa00592;hsa00071;hsa03320;hsa04024;hsa04146;hsa01212;hsa01040	alpha-Linolenic acid metabolism;Fatty acid degradation;PPAR signaling pathway;cAMP signaling pathway;Peroxisome;Fatty acid metabolism;Biosynthesis of unsaturated fatty acids	COG1960	I:Lipid transport and metabolism
A0A024R9B9	Matrilin 2, isoform CRA_b OS=Homo sapiens OX=9606 GN=MATN2 PE=4 SV=1	229	7.8392	0	up	yes	3117000	0	0	0	3.42047e+06	0	0	0	0	0	0	0	0	1.12691e+07	0	4.26512e+07	1.17548e+07	0	0	0	0	0	0	0	0	9.42857e+06	0	3.32612e+06	3.1572e+06	8.1248e+06	0	0	6.87138e+06	6.49352e+06	0	BP:dendrite regeneration;BP:response to axon injury;BP:growth plate cartilage chondrocyte morphogenesis;BP:neuron migration;BP:axon guidance;BP:glial cell migrationCC:extracellular space;CC:extracellular matrix;CC:collagen-containing extracellular matrix;CC:basement membraneMF:extracellular matrix structural constituent;MF:calcium ion binding	GO:0031104;GO:0048678;GO:0003429;GO:0001764;GO:0007411;GO:0008347GO:0005615;GO:0031012;GO:0062023;GO:0005604GO:0005201;GO:0005509	------	------	------	------	------	------
A0A024RA87	Septin 7, isoform CRA_a OS=Homo sapiens OX=9606 GN=SEPT7 PE=3 SV=1	229	7.8392	0	up	yes	381700000	0	2.76368e+10	2.60603e+07	1.79472e+07	0	1.68309e+07	0	1.57249e+09	0	0	0	0	0	0	3.69076e+06	0	0	0	1.35588e+07	0	1.09255e+07	8.79383e+06	9.28909e+06	0	8.3672e+06	4.51531e+09	8.02962e+06	1.57975e+07	0	2.12703e+07	0	0	2.55531e+06	0	BP:cilium assembly;BP:cell differentiation;BP:spermatogenesis;BP:postsynapse organization;BP:cytoskeleton-dependent cytokinesis;BP:regulation of embryonic cell shapeCC:septin complex;CC:membrane;CC:septin ring;CC:motile cilium;CC:midbody;CC:cleavage furrow;CC:spindle;CC:condensed chromosome kinetochore;CC:glutamatergic synapse;CC:axoneme;CC:microtubule cytoskeletonMF:GTPase activity;MF:GTP binding	GO:0060271;GO:0030154;GO:0007283;GO:0099173;GO:0061640;GO:0016476GO:0031105;GO:0016020;GO:0005940;GO:0031514;GO:0030496;GO:0032154;GO:0005819;GO:0000777;GO:0098978;GO:0005930;GO:0015630GO:0003924;GO:0005525	K16944	SEPT7, CDC3	------	------	COG5019;COG5019	D:Cell cycle control, cell division, chromosome partitioning;Z:Cytoskeleton
A0A024RAY9	Lymphoid-restricted membrane protein, isoform CRA_a OS=Homo sapiens OX=9606 GN=LRMP PE=4 SV=1	229	7.8392	0	up	yes	16420000	0	0	2.06179e+07	0	2.15739e+08	0	2.16368e+07	8.9871e+06	0	0	0	0	0	3.43221e+06	0	1.29209e+07	0	0	0	0	5.96633e+06	5.5221e+06	0	1.25232e+07	0	2.44246e+07	6.52471e+06	1.06384e+07	0	0	7.42301e+06	1.56916e+07	1.13335e+08	6.46552e+06	BP:vesicle fusion;BP:neutrophil degranulation;BP:vesicle targeting;BP:single fertilizationCC:membrane;CC:spindle pole;CC:integral component of membrane;CC:endoplasmic reticulum membrane;CC:integral component of plasma membrane;CC:plasma membrane;CC:nuclear envelope;CC:microtubule organizing center;CC:chromosome;CC:azurophil granule membrane	GO:0006906;GO:0043312;GO:0006903;GO:0007338GO:0016020;GO:0000922;GO:0016021;GO:0005789;GO:0005887;GO:0005886;GO:0005635;GO:0005815;GO:0005694;GO:0035577	------	------	------	------	------	------
A0A024RCU9	SFRS protein kinase 1, isoform CRA_e OS=Homo sapiens OX=9606 GN=SRPK1 PE=4 SV=1	229	7.8392	0	up	yes	90660000	0	3.56698e+07	4.55172e+06	0	3.42588e+08	0	5.31053e+06	3.99809e+08	0	2.69409e+06	0	0	0	4.26846e+07	0	0	0	3.65999e+08	0	0	0	0	0	0	0	1.88718e+07	3.01431e+07	2.88747e+07	3.0639e+07	0	1.99024e+07	9.41832e+08	5.08601e+06	1.25446e+07	BP:spliceosomal complex assembly;BP:regulation of mRNA processing;BP:regulation of mRNA splicing, via spliceosome;BP:intracellular signal transduction;BP:positive regulation of viral genome replication;BP:negative regulation of viral genome replication;BP:RNA splicing;BP:protein phosphorylation;BP:innate immune response;BP:chromosome segregation;BP:sperm chromatin condensation;BP:regulation of ge…	GO:0000245;GO:0050684;GO:0048024;GO:0035556;GO:0045070;GO:0045071;GO:0008380;GO:0006468;GO:0045087;GO:0007059;GO:0035092;GO:0010468;GO:0016032GO:0005783;GO:0005737;GO:0005634;GO:0016363;GO:0005886;GO:0005829GO:0000287;GO:0004674;GO:0004672;GO:0005524;GO:0003723	K15409	SRPK1	hsa05168	Herpes simplex infection	------	------
A0A024RDB2	Ras-GTPase activating protein SH3 domain-binding protein 2, isoform CRA_b OS=Homo sapiens OX=9606 GN=G3BP2 PE=4 SV=1	229	7.8392	0	up	yes	29560000	0	0	3.79203e+06	1.02855e+07	0	1.41967e+07	0	0	0	5.68864e+06	0	0	0	2.86468e+07	0	0	0	0	2.00049e+06	3.6066e+06	1.03234e+07	0	0	0	2.34879e+06	0	7.19745e+06	4.8006e+06	3.01872e+08	2.10598e+06	7.12117e+06	2.92876e+07	0	0	BP:cytoplasmic sequestering of NF-kappaB;BP:stress granule assembly;BP:protein homooligomerization;BP:Ras protein signal transduction;BP:viral process;BP:positive regulation of stress granule assembly;BP:mRNA transport;BP:innate immune responseCC:cytoplasmic stress granule;CC:cytoplasm;CC:cytosol;CC:ribonucleoprotein complexMF:receptor signaling complex scaffold activity;MF:RNA binding;MF:mRNA bi…	GO:0007253;GO:0034063;GO:0051260;GO:0007265;GO:0016032;GO:0062029;GO:0051028;GO:0045087GO:0010494;GO:0005737;GO:0005829;GO:1990904GO:0030159;GO:0003723;GO:0003729	------	------	------	------	------	------
A0A044PY82	Uncharacterized protein MISP3 OS=Homo sapiens OX=9606 GN=MISP3 PE=1 SV=1	229	7.8392	0	up	yes	299100000	0	0	0	0	0	0	4.83021e+06	0	5.63817e+06	9.03539e+07	0	6.51321e+06	0	6.93267e+06	0	6.42849e+06	0	0	0	0	0	6.19639e+06	4.34306e+07	0	0	0	0	1.11312e+07	3.49705e+09	4.19346e+06	1.93087e+07	0	1.41855e+07	0	------	------	------	------	------	------	------	------
A0A059QFD5	Cytochrome c oxidase subunit 2 OS=Homo sapiens OX=9606 GN=COX2 PE=3 SV=1	229	7.8392	0	up	yes	15620000	0	1.31303e+08	6.94123e+07	4.52923e+07	0	0	0	0	2.16397e+07	0	2.7195e+07	0	0	0	0	0	0	0	4.19924e+07	3.51235e+07	5.06745e+07	1.53954e+07	2.05095e+07	1.76936e+07	0	3.2133e+07	3.04854e+07	0	0	0	0	2.56092e+07	3.79048e+07	2.30686e+07	CC:mitochondrial inner membrane;CC:integral component of membrane;CC:respiratory chainMF:cytochrome-c oxidase activity;MF:copper ion binding	GO:0005743;GO:0016021;GO:0070469GO:0004129;GO:0005507	------	------	------	------	COG1622	C:Energy production and conversion
A0A060DAH3	MHC class I antigen (Fragment) OS=Homo sapiens OX=9606 GN=HLA-B PE=3 SV=1	229	7.8392	0	up	yes	22120000	0	5.9397e+07	0	6.06216e+06	1.63581e+08	0	0	0	0	0	5.28841e+07	0	1.01089e+07	1.3379e+08	0	2.29394e+07	0	0	0	4.24063e+07	5.32174e+07	0	0	0	4.09545e+07	5.79036e+07	2.02275e+07	3.2964e+07	0	0	9.00729e+07	2.32781e+07	0	0	CC:integral component of membrane	GO:0016021	------	------	------	------	------	------
A0A087WT45	GRIP1-associated protein 1 OS=Homo sapiens OX=9606 GN=GRIPAP1 PE=1 SV=1	229	7.8392	0	up	yes	38010000	0	0	2.82169e+06	0	0	1.17773e+07	2.97202e+06	0	0	6.66454e+06	3.50141e+06	0	0	7.1686e+07	0	4.08379e+06	0	6.53856e+07	1.81742e+06	0	0	2.87144e+06	9.12163e+06	0	0	1.14484e+08	7.1296e+06	0	2.28931e+08	2.94899e+06	1.03257e+07	8.31993e+07	0	0	------	------	------	------	------	------	------	------
A0A096LPE2	SAA2-SAA4 readthrough OS=Homo sapiens OX=9606 GN=SAA2-SAA4 PE=4 SV=1	229	7.8392	0	up	yes	136400000	0	0	0	0	0	0	0	0	0	3.12057e+09	0	0	0	7.06944e+06	4.92945e+07	0	4.9962e+07	0	0	0	0	0	2.44015e+07	0	0	0	0	0	3.27976e+07	5.35758e+08	4.00174e+07	0	9.67853e+08	3.65591e+07	BP:acute-phase response;BP:cell chemotaxisCC:high-density lipoprotein particle;CC:extracellular space;CC:extracellular region;CC:extracellular exosomeMF:chemoattractant activity	GO:0006953;GO:0060326GO:0034364;GO:0005615;GO:0005576;GO:0070062GO:0042056	K17310	SAA	------	------	------	------
A0A0C4DFX6	NPC1-like intracellular cholesterol transporter 1 OS=Homo sapiens OX=9606 GN=NPC1L1 PE=1 SV=1	229	7.8392	0	up	yes	141900000	0	0	0	0	0	0	0	0	0	0	0	0	4.3061e+06	6.41662e+06	0	0	0	5.37388e+08	0	3.83693e+07	0	0	0	2.31278e+06	0	0	3.25581e+07	5.57868e+06	1203613044	0	4.56731e+06	4.53883e+08	0	0	BP:cellular response to sterol depletion;BP:intestinal cholesterol absorption;BP:response to drug;BP:cholesterol transport;BP:cholesterol biosynthetic process;BP:lipoprotein metabolic process;BP:intestinal lipid absorptionCC:apical plasma membrane;CC:integral component of membrane;CC:spanning component of plasma membrane;CC:cytoplasmic vesicle membrane;CC:plasma membrane;CC:brush border membraneM…	GO:0071501;GO:0030299;GO:0042493;GO:0030301;GO:0006695;GO:0042157;GO:0098856GO:0016324;GO:0016021;GO:0044214;GO:0030659;GO:0005886;GO:0031526GO:0005319;GO:0031489;GO:0017137;GO:0008144	------	------	------	------	------	------
A0A0F7T8B3	IGHV5-51 protein (Fragment) OS=Homo sapiens OX=9606 GN=IGHV5-51 PE=4 SV=1	229	7.8392	0	up	yes	8322000	0	0	3.68926e+06	0	0	0	0	0	5.12518e+07	0	0	0	0	0	2.32035e+07	0	1.18172e+07	7.72151e+07	7.68084e+06	0	0	6.89229e+06	3.77908e+07	1.06834e+07	0	4.99686e+06	0	0	0	1.82778e+07	4.96147e+06	0	0	2.31545e+07	------	------	------	------	------	------	------	------
A0A0G2JNJ5	Mucin-4 (Fragment) OS=Homo sapiens OX=9606 GN=MUC4 PE=1 SV=1	229	7.8392	0	up	yes	10340000	0	0	0	0	0	1.57972e+07	2.82916e+07	0	0	0	9.75722e+06	0	0	0	5.86478e+06	0	0	0	0	0	0	1.01502e+07	0	2.60101e+07	0	0	3.60893e+06	9.08628e+06	4.77531e+07	2.33695e+07	1.4229e+07	0	0	0	BP:stimulatory C-type lectin receptor signaling pathway;BP:O-glycan processing;BP:cell-matrix adhesion;BP:regulation of receptor activity;BP:maintenance of gastrointestinal epitheliumCC:extracellular exosome;CC:extracellular space;CC:integral component of membrane;CC:membrane;CC:Golgi lumen;CC:integral component of plasma membrane;CC:plasma membrane;CC:extracellular matrix;CC:vesicleMF:ErbB-2 cla…	GO:0002223;GO:0016266;GO:0007160;GO:0010469;GO:0030277GO:0070062;GO:0005615;GO:0016021;GO:0016020;GO:0005796;GO:0005887;GO:0005886;GO:0031012;GO:0031982GO:0005176;GO:0030197	------	------	------	------	------	------
A0A0G2JPP5	Protein scribble homolog OS=Homo sapiens OX=9606 GN=SCRIB PE=1 SV=1	229	7.8392	0	up	yes	109200000	0	4.32598e+08	0	0	1.1875e+08	0	0	2.07018e+08	0	0	2.37722e+07	0	2.01436e+07	8.53981e+06	1.1359e+08	5.50171e+07	0	3.25249e+08	0	0	0	0	2.81845e+06	0	0	9.37771e+07	4.02884e+07	1.12932e+07	1.23094e+07	0	0	1.15033e+09	0	0	BP:establishment or maintenance of epithelial cell apical/basal polarity;BP:cochlear nucleus development;BP:auditory receptor cell stereocilium organization;BP:suppression by virus of host type I interferon-mediated signaling pathway;BP:suppression by virus of host STAT2 activity;BP:suppression by virus of host STAT1 activity;BP:astrocyte cell migration;BP:post-anal tail morphogenesis;BP:positive…	GO:0045197;GO:0021747;GO:0060088;GO:0039502;GO:0039564;GO:0039563;GO:0043615;GO:0036342;GO:0043065;GO:0097120;GO:0098968;GO:0048488;GO:0060561;GO:0001921;GO:0045930;GO:0008283;GO:0098609;GO:0016080;GO:0035089;GO:0060603;GO:0050918;GO:0001843;GO:0042060;GO:0098887;GO:0016477;GO:0090630;GO:0099149;GO:0043113;GO:0071896GO:0099147;GO:0045202;GO:0005654;GO:0070062;GO:0035748;GO:0098793;GO:0030027;GO:0…	------	------	------	------	COG4886	S:Function unknown
A0A0G2JRA3	Leucine-rich repeat-containing protein 37A2 OS=Homo sapiens OX=9606 GN=LRRC37A2 PE=1 SV=1	229	7.8392	0	up	yes	232500000	0	1.28967e+07	7.8474e+07	0	1.0788e+08	7.88781e+06	8.08833e+06	0	0	0	0	0	0	7.89901e+06	5.76738e+07	0	0	0	0	5.74949e+06	0	6.91941e+06	1.26992e+07	0	8.00137e+06	0	1.70311e+08	0	2.57741e+09	0	0	1.5286e+07	5.889e+06	0	CC:integral component of membrane	GO:0016021	------	------	------	------	------	------
A0A0U1RQD1	Chromosome 12 open reading frame 5, isoform CRA_b OS=Homo sapiens OX=9606 GN=TIGAR PE=1 SV=1	229	7.8392	0	up	yes	4611000	0	0	6.32331e+06	0	0	1.04013e+07	0	0	3.16673e+06	0	1.16557e+07	0	4.8097e+06	1.25884e+07	890393	9.83932e+06	0	0	0	0	0	0	2.88825e+06	0	0	0	0	1.24223e+07	8.70762e+06	2.30654e+07	4.28683e+06	0	3.95582e+06	0	BP:intestinal epithelial cell development;BP:positive regulation of cardiac muscle cell apoptotic process;BP:response to xenobiotic stimulus;BP:response to gamma radiation;BP:fructose 1,6-bisphosphate metabolic process;BP:cellular response to hypoxia;BP:negative regulation of programmed cell death;BP:positive regulation of hexokinase activity;BP:cellular response to cobalt ion;BP:negative regulat…	GO:0060576;GO:0010666;GO:0009410;GO:0010332;GO:0030388;GO:0071456;GO:0043069;GO:1903301;GO:0071279;GO:2000378;GO:1902153;GO:0006914;GO:0006915;GO:0006974;GO:1901215;GO:0002931;GO:0043456;GO:1901525;GO:1904024;GO:0045820;GO:0045739;GO:0006003GO:0005737;GO:0005634;GO:0005829;GO:0005622;GO:0005741GO:0004083;GO:0003824;GO:0004331	K14634	TIGAR	hsa05230;hsa00051	Central carbon metabolism in cancer;Fructose and mannose metabolism	COG0588;COG0406	G:Carbohydrate transport and metabolism;
A0A0U1RQH1	Synaptotagmin-like protein 2 (Fragment) OS=Homo sapiens OX=9606 GN=SYTL2 PE=1 SV=1	229	7.8392	0	up	yes	15050000	0	3.93672e+08	0	0	5.57343e+08	0	0	1.72199e+08	0	0	4.05686e+06	0	0	0	0	0	0	1.1636e+07	0	0	0	0	0	0	9.79328e+06	5.80907e+07	0	3.98276e+06	2.24953e+07	1.40829e+07	0	7.21835e+07	0	0	BP:exocytosisCC:exocytic vesicleMF:phosphatidylserine binding	GO:0006887GO:0070382GO:0001786	------	------	------	------	------	------
A0A0U1RR14	Casein kinase I isoform gamma-1 (Fragment) OS=Homo sapiens OX=9606 GN=CSNK1G1 PE=1 SV=1	229	7.8392	0	up	yes	15580000	0	0	1.07713e+07	2.34957e+07	0	8.08623e+06	0	0	6.12591e+06	0	4.27247e+06	0	0	1.59755e+07	0	1.27414e+07	0	6.95947e+06	0	0	0	0	5.12081e+06	0	2.53546e+07	0	1.01139e+07	3.01242e+07	1.485e+07	8.56314e+06	3.04052e+07	5.27911e+07	9.63067e+06	0	BP:Wnt signaling pathwayCC:cytoplasm;CC:cytosolMF:protein serine/threonine kinase activity;MF:ATP binding	GO:0016055GO:0005737;GO:0005829GO:0004674;GO:0005524	K08958	CSNK1G	hsa04340	Hedgehog signaling pathway	------	------
A0A0X9T7T4	MS-D3 heavy chain variable region (Fragment) OS=Homo sapiens OX=9606 PE=2 SV=1	229	7.8392	0	up	yes	47740000	0	0	6.06507e+06	1.54837e+07	0	0	4.11894e+06	0	5.32794e+07	0	0	0	0	0	7.68526e+07	0	0	5.81724e+06	5.3567e+06	0	7.42076e+06	2.77421e+07	2.49183e+08	1.35797e+08	0	1.52469e+07	0	6.15116e+06	6.79148e+06	1.64016e+07	1.50502e+07	0	5.31298e+07	7.5118e+07	------	------	------	------	------	------	------	------
A0A120HG44	MS-E1 heavy chain variable region (Fragment) OS=Homo sapiens OX=9606 PE=2 SV=1	229	7.8392	0	up	yes	25170000	0	0	5.49107e+06	1.27131e+07	0	0	3.04251e+07	0	0	9.87538e+06	0	0	0	3.55406e+06	1.47085e+08	0	6.69282e+06	0	0	0	0	0	1.72364e+08	2.89797e+07	0	0	0	0	3.68522e+07	1.11613e+07	0	0	2.15375e+07	3.1168e+07	------	------	------	------	------	------	------	------
A0A140TA69	Keratin, type I cuticular Ha4 OS=Homo sapiens OX=9606 GN=KRT34 PE=3 SV=1	229	7.8392	0	up	yes	181400000	0	1.59689e+08	0	0	1.89045e+08	0	1.54944e+07	6.91035e+07	3.64266e+06	0	0	0	0	6.67222e+07	4.02755e+06	5.57621e+07	0	5.39061e+07	0	0	0	0	0	0	1.12502e+08	2.22597e+07	8.29205e+06	1.59544e+07	1.87062e+09	0	4.70222e+07	9.55832e+06	4.62429e+06	8.65089e+07	BP:keratinization;BP:cornification;BP:epidermis developmentCC:extracellular space;CC:cytosol;CC:intermediate filamentMF:structural molecule activity	GO:0031424;GO:0070268;GO:0008544GO:0005615;GO:0005829;GO:0005882GO:0005198	K07604	KRT1	------	------	------	------
A0A142CHG9	GO2-q chimeric G-protein OS=Homo sapiens OX=9606 PE=2 SV=1	229	7.8392	0	up	yes	16240000	0	7.92566e+07	0	0	7.40583e+07	0	5.38607e+06	5.44127e+07	0	7.91046e+06	1.36635e+07	0	1.5127e+07	0	4.15888e+06	2.15302e+07	0	0	0	0	5.54547e+06	0	1.47322e+07	1.2152e+07	0	0	1.12865e+07	2.17033e+07	2.63603e+07	3.68956e+07	0	0	6.27112e+07	9.07493e+06	BP:adenylate cyclase-modulating G-protein coupled receptor signaling pathwayMF:metal ion binding;MF:G-protein beta/gamma-subunit complex binding;MF:GTPase activity;MF:GTP binding	GO:0007188GO:0046872;GO:0031683;GO:0003924;GO:0005525	------	------	------	------	------	------
A0A1B0GTL5	Rab11 family-interacting protein 5 OS=Homo sapiens OX=9606 GN=RAB11FIP5 PE=1 SV=1	229	7.8392	0	up	yes	8871000	0	3.15709e+07	1.58898e+07	2.37196e+07	1.09607e+08	1.17613e+07	0	0	0	0	0	0	0	4.5689e+06	0	7.94489e+06	0	0	1.97014e+07	0	0	4.22029e+06	8.49567e+06	0	3.39539e+07	6.19299e+06	7.87555e+06	2.68961e+07	0	9.6854e+06	2.43341e+06	0	1.09182e+07	0	------	------	K12484	RAB11FIP1_2_5	hsa04144	Endocytosis	------	------
A0A1B0GVM2	TRPM8 channel-associated factor 2C (Fragment) OS=Homo sapiens OX=9606 GN=TCAF2C PE=4 SV=1	229	7.8392	0	up	yes	30610000	0	2.11678e+08	3.32617e+07	0	0	0	2.01345e+07	0	0	0	8.69632e+06	0	7.58637e+07	6.03904e+06	0	7.18073e+07	0	1.08198e+08	0	0	4.07245e+06	0	1.86858e+06	0	4.63127e+07	5.40554e+07	7.76541e+07	3.36262e+07	3.84298e+07	7.56425e+06	2.28042e+07	8.50055e+07	0	0	BP:negative regulation of anion channel activity;BP:positive regulation of protein targeting to membraneCC:plasma membraneMF:ion channel binding	GO:0010360;GO:0090314GO:0005886GO:0044325	------	------	------	------	------	------
A0A1L2BU46	Anti-staphylococcal enterotoxin A variable region lambda chain (Fragment) OS=Homo sapiens OX=9606 PE=2 SV=1	229	7.8392	0	up	yes	8354000	0	2.0054e+08	4.75886e+06	0	4.84626e+07	3.51495e+06	0	1.25079e+08	7.447e+06	0	0	0	0	0	0	0	0	1.03348e+08	0	0	0	0	2.46132e+06	0	1.21666e+07	5.1486e+07	5.72997e+06	1.7131e+07	0	1.12782e+07	0	0	0	0	------	------	------	------	------	------	------	------
A0A1L7B5J3	Alpha-1-antitrypsin short transcript variant 1C4 OS=Homo sapiens OX=9606 GN=SERPINA1 PE=2 SV=1	229	7.8392	0	up	yes	56500000	0	1.32939e+09	0	8.00034e+06	2.48177e+09	2.21891e+07	0	8.03015e+07	0	1.5452e+07	0	0	0	0	1.21166e+07	0	0	0	1.18835e+07	0	0	0	1.67714e+08	4.35688e+06	0	6.25052e+06	0	0	6.69256e+07	5.03293e+07	0	0	2.17259e+07	3.60704e+08	BP:COPII vesicle coating;BP:blood coagulation;BP:cellular protein metabolic process;BP:ER to Golgi vesicle-mediated transport;BP:platelet degranulation;BP:post-translational protein modification;BP:acute-phase response;BP:negative regulation of endopeptidase activity;BP:neutrophil degranulationCC:endoplasmic reticulum;CC:endoplasmic reticulum-Golgi intermediate compartment membrane;CC:endoplasmic…	GO:0048208;GO:0007596;GO:0044267;GO:0006888;GO:0002576;GO:0043687;GO:0006953;GO:0010951;GO:0043312GO:0005783;GO:0033116;GO:0005788;GO:1904813;GO:0030134;GO:0005615;GO:0031093;GO:0005794;GO:0062023;GO:0070062;GO:0043231;GO:0000139;GO:0005576GO:0002020;GO:0042802;GO:0004867	K03984	SERPINA1, AAT	hsa04610	Complement and coagulation cascades	------	------
A0A1U9X8J5	SLC39A7 OS=Homo sapiens OX=9606 PE=4 SV=1	229	7.8392	0	up	yes	7288000	0	2.0369e+07	0	0	8.4854e+06	0	2.16205e+07	0	6.86104e+06	0	1.27226e+07	0	0	0	0	2.00623e+07	0	2.19166e+07	5.19353e+06	2.38256e+06	0	0	0	0	2.8663e+06	0	1.54311e+07	1.08238e+07	0	5.12112e+06	3.43082e+07	1.00831e+07	8.82664e+06	0	BP:cellular zinc ion homeostasis;BP:zinc II ion transmembrane transport;BP:zinc II ion transportCC:Golgi apparatus;CC:endoplasmic reticulum;CC:integral component of membrane;CC:membrane;CC:endoplasmic reticulum membrane;CC:nucleoplasmMF:zinc ion transmembrane transporter activity;MF:metal ion transmembrane transporter activity	GO:0006882;GO:0071577;GO:0006829GO:0005794;GO:0005783;GO:0016021;GO:0016020;GO:0005789;GO:0005654GO:0005385;GO:0046873	K14713	SLC39A7, KE4, ZIP7	------	------	COG0428	P:Inorganic ion transport and metabolism
A0A1W2PP10	Vacuolar protein sorting-associated protein 35 OS=Homo sapiens OX=9606 GN=VPS35 PE=1 SV=1	229	7.8392	0	up	yes	6102000	0	0	0	0	0	0	0	7.53163e+06	1.13315e+07	0	3.42172e+06	1.45882e+07	0	0	0	2.05003e+07	0	0	0	0	2.38813e+07	0	0	2.2565e+07	1.24289e+07	0	0	2.09067e+07	8.68466e+06	0	0	0	5.34814e+06	3.28548e+06	BP:negative regulation of late endosome to lysosome transport;BP:positive regulation of gene expression;BP:negative regulation of inflammatory response;BP:mitochondrial fragmentation involved in apoptotic process;BP:positive regulation of mitochondrial fission;BP:transcytosis;BP:regulation of dendritic spine maintenance;BP:neurotransmitter receptor transport, endosome to plasma membrane;BP:positi…	GO:1902823;GO:0010628;GO:0050728;GO:0043653;GO:0090141;GO:0045056;GO:1902950;GO:0099639;GO:1903364;GO:2000331;GO:0060161;GO:0042147;GO:1901215;GO:0099074;GO:0031647;GO:0036010;GO:0015031GO:0097422;GO:0010008;GO:0005739;GO:0099073;GO:0005829;GO:0005764;GO:0005765;GO:0030906;GO:0005769GO:0031748	K18468	VPS35	hsa04144	Endocytosis	------	------
A0A1W6IYJ4	N90-VRC38.03 light chain variable region (Fragment) OS=Homo sapiens OX=9606 PE=2 SV=1	229	7.8392	0	up	yes	20970000	0	0	1.71912e+06	0	0	0	0	0	4.26928e+07	1.89969e+07	1.32876e+07	6.92734e+07	2.29357e+07	0	1.32938e+08	0	9.23288e+06	0	0	0	3.59843e+06	5.11395e+07	1.97046e+07	9.09521e+07	0	6.54855e+07	4.17551e+06	1.75481e+06	5.445e+07	0	0	0	9.44161e+06	5.71462e+06	------	------	------	------	------	------	------	------
A0A1W6IYL8	N90-VRC38.08 light chain variable region (Fragment) OS=Homo sapiens OX=9606 PE=2 SV=1	229	7.8392	0	up	yes	26140000	0	2.83947e+07	1.48941e+06	0	1.7251e+07	0	9.86151e+07	0	2.39248e+07	0	0	8.07712e+06	0	0	3.94435e+07	6.84319e+06	0	0	0	0	0	8.2645e+07	0	1.74472e+08	0	9.30088e+07	1.70891e+06	5.60562e+06	0	6.67019e+06	1.29423e+07	1.9324e+07	0	0	------	------	------	------	------	------	------	------
A0A220T1R7	LEMD2 OS=Homo sapiens OX=9606 GN=LEMD2 PE=2 SV=1	229	7.8392	0	up	yes	11950000	0	2.31421e+07	7.34832e+06	0	0	0	1.35211e+07	0	0	0	2.94419e+06	0	0	4.66348e+07	0	2.76486e+07	0	0	0	0	0	0	0	6.55451e+06	4.68943e+06	0	1.61136e+07	9.51649e+06	0	6.0506e+06	5.25984e+07	2.38759e+07	0	2.39769e+07	BP:regulation of intracellular signal transduction;BP:nuclear envelope organizationCC:nuclear inner membrane;CC:integral component of membrane	GO:1902531;GO:0006998GO:0005637;GO:0016021	------	------	------	------	------	------
A0A2H4GDA3	Kallikrein-2 isoform 5 OS=Homo sapiens OX=9606 GN=KLK2 PE=2 SV=1	229	7.8392	0	up	yes	94430000	0	0	0	5.26574e+08	1.64708e+08	5.83956e+08	0	0	0	0	0	1.50241e+08	0	0	1.16496e+07	0	0	0	0	4.81744e+08	4.34545e+07	2.71182e+07	1.40266e+08	0	1.10605e+07	2.6934e+07	4.45684e+06	0	1.72007e+08	0	8.42417e+06	7.69987e+08	0	0	BP:regulation of systemic arterial blood pressure;BP:zymogen activation;BP:extracellular matrix disassemblyCC:extracellular exosome;CC:secretory granule;CC:extracellular regionMF:serine-type endopeptidase activity	GO:0003073;GO:0031638;GO:0022617GO:0070062;GO:0030141;GO:0005576GO:0004252	K01325	KLK1_2	hsa04614;hsa04961	Renin-angiotensin system;Endocrine and other factor-regulated calcium reabsorption	COG5640	O:Posttranslational modification, protein turnover, chaperones
A0A2Q2TH77	Golgin subfamily A member 2 OS=Homo sapiens OX=9606 GN=GOLGA2 PE=1 SV=1	229	7.8392	0	up	yes	6497000	0	0	1.61237e+07	0	1.61065e+07	0	1.15429e+07	1.06616e+07	0	3.8368e+06	1.51631e+07	0	3.03909e+06	0	0	9.46573e+06	0	0	4.36684e+06	0	2.21857e+06	0	0	0	0	2.96859e+06	1.13387e+07	2.46828e+06	0	0	3.77332e+06	4.64272e+07	1.09858e+07	0	BP:COPII vesicle coating;BP:protein homotetramerization;BP:spindle assembly involved in meiosis;BP:mitotic spindle assembly;BP:asymmetric cell division;BP:spindle assembly;BP:microtubule nucleation;BP:ER to Golgi vesicle-mediated transport;BP:protein glycosylation;BP:Golgi disassembly;BP:Golgi ribbon formation;BP:positive regulation of ubiquitin protein ligase activity;BP:negative regulation of a…	GO:0048208;GO:0051289;GO:0090306;GO:0090307;GO:0008356;GO:0051225;GO:0007020;GO:0006888;GO:0006486;GO:0090166;GO:0090161;GO:1904668;GO:0010507;GO:0032091;GO:0060050;GO:0007030;GO:0007098;GO:0015031GO:0033116;GO:0000922;GO:0072686;GO:0005874;GO:0030134;GO:0005794;GO:0032580;GO:0000137;GO:0005801;GO:0000139GO:0042802;GO:0008017;GO:0061676;GO:0019901;GO:0019905;GO:0045296	K20358	GOLGA2	------	------	------	------
A0A2R8YDS4	Nitric oxide synthase OS=Homo sapiens OX=9606 GN=NOS2 PE=1 SV=1	229	7.8392	0	up	yes	24670000	0	0	0	4.6586e+07	6.24851e+07	0	1.03261e+08	0	0	840437	1.44639e+08	0	0	3.18534e+07	0	0	4.00275e+07	5.72885e+07	0	0	0	0	8.5374e+06	0	0	2.27848e+07	3.05764e+06	0	1.4516e+07	8.33404e+06	3.36051e+07	1.59482e+08	4.57755e+07	0	BP:positive regulation of guanylate cyclase activity;BP:regulation of cell proliferation;BP:response to bacterium;BP:cellular response to lipopolysaccharide;BP:cytokine-mediated signaling pathway;BP:interleukin-6 secretion;BP:interleukin-8 secretion;BP:negative regulation of gene expression;BP:cellular response to drug;BP:defense response to bacterium;BP:defense response to Gram-negative bacteriu…	GO:0031284;GO:0042127;GO:0009617;GO:0071222;GO:0019221;GO:0072604;GO:0072606;GO:0010629;GO:0035690;GO:0042742;GO:0050829;GO:0032496;GO:0001666;GO:0006809;GO:0051712;GO:0032310;GO:0006527;GO:0007623;GO:0006625;GO:0018119;GO:0050796;GO:0043457;GO:0045454;GO:0007263;GO:1900015;GO:0002227;GO:0045776;GO:0071346;GO:0001912;GO:0042177;GO:0009725;GO:0006801GO:0005777;GO:0005782;GO:0005737;GO:0005634;GO:0…	K13241	NOS2	hsa05133;hsa05132;hsa00330;hsa04371;hsa04020;hsa05145;hsa05200;hsa05152;hsa05142;hsa05140;hsa00220;hsa05222;hsa04146;hsa04066;hsa05146	Pertussis;Salmonella infection;Arginine and proline metabolism;Apelin signaling pathway;Calcium signaling pathway;Toxoplasmosis;Pathways in cancer;Tuberculosis;Chagas diseas;Leishmaniasis;Arginine biosynthesis;Small cell lung cancer;Peroxisome;HIF-1 signaling pathway;Amoebiasis	COG4362;COG4362;COG0369	P:Inorganic ion transport and metabolism;E:Amino acid transport and metabolism;P:Inorganic ion transport and metabolism
A0A2Y9CYF7	Ig heavy chain variable region (Fragment) OS=Homo sapiens OX=9606 GN=IgH PE=2 SV=1	229	7.8392	0	up	yes	359800000	0	0	7.86499e+07	0	0	6.94726e+06	9.76507e+06	0	8.84823e+06	0	6.03437e+06	0	2.48004e+07	0	1.05541e+08	1.8447e+07	0	5.96246e+07	0	0	0	4.73251e+07	5.20977e+07	9.72682e+07	0	2.08824e+08	0	1.3991e+07	2.44768e+09	0	1.34312e+09	0	0	1.54444e+08	------	------	------	------	------	------	------	------
A0A384N6F8	Epididymis secretory sperm binding protein OS=Homo sapiens OX=9606 PE=2 SV=1	229	7.8392	0	up	yes	3986000	0	0	1.18745e+07	0	1.13423e+07	8.27053e+06	0	2.5491e+06	0	0	8.75139e+06	0	0	0	1.97895e+06	0	0	0	8.31642e+06	3.65962e+06	1.30388e+07	8.32444e+06	1.21248e+07	7.71327e+06	4.83412e+06	0	0	1.79572e+07	0	3.18583e+06	0	0	2.01099e+06	0	MF:protein homodimerization activity;MF:metal ion binding;MF:heme binding;MF:RNA polymerase II transcription factor activity, sequence-specific DNA binding;MF:DNA binding	GO:0042803;GO:0046872;GO:0020037;GO:0000981;GO:0003677	------	------	------	------	------	------
A0A3B3ITR6	Phenylalanine--tRNA ligase, mitochondrial OS=Homo sapiens OX=9606 GN=FARS2 PE=1 SV=1	229	7.8392	0	up	yes	23620000	0	0	0	0	0	0	5.74819e+07	0	0	0	9.96253e+06	2.09396e+06	0	8.33064e+06	0	1.19065e+07	0	0	0	0	0	0	2.4837e+06	0	0	0	1.39184e+06	1.53291e+07	9.83205e+06	7.85323e+06	1.86794e+08	0	5.78126e+07	1.8991e+06	BP:tRNA processing;BP:phenylalanyl-tRNA aminoacylation;BP:tRNA aminoacylation for protein translationCC:cytoplasm;CC:mitochondrion;CC:mitochondrial matrixMF:phenylalanine-tRNA ligase activity;MF:tRNA binding;MF:ATP binding	GO:0008033;GO:0006432;GO:0006418GO:0005737;GO:0005739;GO:0005759GO:0004826;GO:0000049;GO:0005524	K01889	FARSA, pheS	hsa00970	Aminoacyl-tRNA biosynthesis	COG0016;COG0072	J:Translation, ribosomal structure and biogenesis;
A0A3G2C0L7	MHC class I antigen F OS=Homo sapiens OX=9606 GN=HLA-F PE=3 SV=1	229	7.8392	0	up	yes	7111000	0	3.16214e+07	0	1.1135e+07	0	0	0	9.30235e+07	0	0	4.80549e+06	0	0	8.51254e+07	1.66287e+07	0	0	1.17699e+07	0	0	0	0	0	2.84209e+07	0	0	4.52442e+06	5.81139e+06	2.95975e+07	7.18264e+06	9.80042e+06	0	0	0	BP:positive regulation of natural killer cell cytokine production;BP:negative regulation of natural killer cell cytokine production;BP:negative regulation of T cell cytokine production;BP:antigen processing and presentation of peptide antigen via MHC class I;BP:antigen processing and presentation of exogenous peptide antigen via MHC class Ib;BP:antigen processing and presentation of endogenous pe…	GO:0002729;GO:0002728;GO:0002725;GO:0002474;GO:0002477;GO:0002476;GO:0002479;GO:0045953;GO:0043323;GO:0043322;GO:0060333;GO:0002486;GO:0002480;GO:0060337;GO:0006955;GO:1901215;GO:0050776;GO:0001916GO:0009897;GO:0005783;GO:0012507;GO:0055038;GO:0005615;GO:0016021;GO:0016020;GO:0071556;GO:0005886;GO:0031901;GO:0009986;GO:0032398;GO:0042612;GO:0030670;GO:0000139;GO:0005765GO:0030881;GO:0046978;GO:00…	K06751	MHC1	hsa04612;hsa04650;hsa05320;hsa05330;hsa05203;hsa05332;hsa04514;hsa04145;hsa04144;hsa04940;hsa05166;hsa05169;hsa05416;hsa05168	Antigen processing and presentation;Natural killer cell mediated cytotoxicity;Autoimmune thyroid disease;Allograft rejection;Viral carcinogenesis;Graft-versus-host disease;Cell adhesion molecule;Phagosome;Endocytosis;Type I diabetes mellitus;HTLV-I infection;Epstein-Barr virus infection;Viral myocarditis;Herpes simplex infection	------	------
A0A4P8J2G5	IgK_IGKV3-11 (Fragment) OS=Homo sapiens OX=9606 PE=2 SV=1	229	7.8392	0	up	yes	181600000	0	0	0	0	0	2.90772e+07	0	0	0	0	0	6.17348e+07	0	1.33534e+07	0	0	5.38964e+06	0	0	0	0	0	0	0	0	5.712e+07	1.98459e+07	0	9.2289e+07	3.26467e+07	7.18701e+07	1.87991e+09	2.60805e+07	0	------	------	------	------	------	------	------	------
A0A4P8J535	IgG4_IGHV3-30 (Fragment) OS=Homo sapiens OX=9606 PE=2 SV=1	229	7.8392	0	up	yes	34080000	0	0	7.72447e+06	1.19513e+07	1.97786e+07	0	7.62449e+06	0	4.89947e+06	0	0	0	0	0	1.50536e+07	0	0	0	0	0	0	0	5.9507e+06	1.28037e+07	0	0	0	0	3.16262e+08	0	1.11388e+07	3.07004e+07	1.83832e+07	1.37068e+07	------	------	------	------	------	------	------	------
A0A4P8J5I5	IgG2_IGHV3-30-3 (Fragment) OS=Homo sapiens OX=9606 PE=2 SV=1	229	7.8392	0	up	yes	49340000	0	0	3.59626e+07	4.22529e+07	0	1.22406e+07	0	7.96239e+07	0	2.46337e+07	0	0	0	6.14406e+07	1.9233e+08	0	0	3.53398e+07	9.0016e+06	0	0	2.42436e+07	9.4109e+07	1.28498e+08	0	3.62608e+07	6.54809e+07	0	0	0	0	1.31798e+08	1.84975e+07	1.17493e+08	------	------	------	------	------	------	------	------
A0A4P8J5J5	IgG1_IGHV3-23 (Fragment) OS=Homo sapiens OX=9606 PE=2 SV=1	229	7.8392	0	up	yes	5216000	0	0	5.7891e+06	0	0	0	1.59084e+07	0	0	0	9.24212e+06	0	0	0	2.20071e+06	8.03329e+06	0	2.83886e+08	7.03078e+06	0	0	0	1.33085e+07	2.15488e+06	0	0	1.07623e+07	5.79083e+06	0	8.68739e+06	1.75567e+07	0	0	4.33429e+06	------	------	------	------	------	------	------	------
A0A516UVP7	MHC class II antigen OS=Homo sapiens OX=9606 GN=HLA-DPA1 PE=3 SV=1	229	7.8392	0	up	yes	28430000	0	0	1.41578e+07	0	0	2.70711e+07	8.62816e+07	0	0	0	4.34019e+07	0	0	5.23527e+07	3.34586e+06	1.52045e+07	0	0	1.5473e+07	0	0	1.42407e+07	3.74791e+06	8.65994e+06	0	0	0	1.19218e+08	0	1.36483e+07	9.34839e+07	4.98202e+07	4.70411e+07	5.54085e+06	BP:antigen processing and presentation of peptide or polysaccharide antigen via MHC class II;BP:adaptive immune responseCC:integral component of membrane;CC:MHC class II protein complex	GO:0002504;GO:0002250GO:0016021;GO:0042613	------	------	------	------	------	------
A0A5C2FTP7	IGL c72_light_IGKV3-20_IGKJ1 (Fragment) OS=Homo sapiens OX=9606 PE=2 SV=1	229	7.8392	0	up	yes	17310000	0	0	0	0	0	0	0	7.36749e+06	0	1.66104e+08	5.51508e+06	1.18093e+08	2.64372e+07	0	3.84181e+07	0	0	2.67746e+07	1.22335e+07	0	5.12029e+07	3.46784e+07	8.18559e+06	1.81782e+07	3.96893e+07	1.0279e+07	1.43869e+07	3.26972e+07	8.88594e+06	1.74809e+07	8.11012e+06	0	3.99403e+07	9.91621e+06	------	------	------	------	------	------	------	------
A0A5C2FU10	IGL c451_light_IGLV1-44_IGLJ3 (Fragment) OS=Homo sapiens OX=9606 PE=2 SV=1	229	7.8392	0	up	yes	21160000	0	0	6.09295e+06	0	0	0	0	1.06741e+07	1.14762e+07	1.99623e+07	0	2.40026e+07	0	0	6.0111e+06	0	3.72811e+06	0	8.48432e+06	0	7.06053e+06	1.58128e+07	6.88477e+06	1.04019e+07	0	3.39403e+07	2.51867e+07	0	2.50245e+07	0	0	1.3354e+08	9.92287e+06	9.07059e+06	------	------	------	------	------	------	------	------
A0A5C2FUD7	IGL c469_light_IGKV1-12_IGKJ4 (Fragment) OS=Homo sapiens OX=9606 PE=2 SV=1	229	7.8392	0	up	yes	48680000	0	0	0	0	1.10941e+08	0	0	2.53885e+07	3.59295e+07	1.40986e+07	0	0	2.89453e+07	5.19554e+06	8.65054e+07	8.45707e+06	0	0	0	0	0	1.50401e+07	2.24638e+08	1.47617e+08	4.56097e+06	9.74286e+07	0	1.29912e+07	6.4874e+07	0	1.27431e+07	0	8.61684e+06	1.07193e+07	------	------	------	------	------	------	------	------
A0A5C2FUZ4	IGL c848_light_IGLV2-23_IGLJ3 (Fragment) OS=Homo sapiens OX=9606 PE=2 SV=1	229	7.8392	0	up	yes	28090000	0	4.73532e+07	7.72469e+06	0	0	0	0	0	6.14701e+06	5.31854e+06	2.45502e+06	2.10239e+07	0	0	4.86039e+07	3.93977e+06	2.04537e+07	0	0	0	0	5.1759e+06	0	5.55152e+07	0	8.77155e+07	0	0	1.14007e+08	1.32183e+07	2.56263e+06	0	3.67097e+07	2.73108e+07	------	------	------	------	------	------	------	------
A0A5C2FV62	IGL c928_light_IGKV4-1_IGKJ4 (Fragment) OS=Homo sapiens OX=9606 PE=2 SV=1	229	7.8392	0	up	yes	60160000	0	0	0	0	0	0	0	1.1987e+08	8.31576e+07	1.96483e+06	0	4.92253e+07	0	3.75914e+06	4.30975e+06	0	0	0	2.97092e+07	0	0	0	7.03866e+06	4.19668e+07	4.96681e+06	1.19031e+08	3.72754e+06	6.8531e+06	1.5203e+08	0	0	1.50703e+08	0	2.35593e+08	------	------	------	------	------	------	------	------
A0A5C2FVA6	IGL c978_light_IGLV2-18_IGLJ2 (Fragment) OS=Homo sapiens OX=9606 PE=2 SV=1	229	7.8392	0	up	yes	235900000	0	0	0	1.18256e+07	0	0	2.743e+06	2.09042e+07	0	2.54098e+07	1.43165e+07	0	0	2.71575e+07	0	0	7.79558e+06	0	2.09316e+07	1.753e+07	0	4.40809e+08	1.39582e+07	2.31092e+07	1.12145e+07	0	5.39689e+06	0	1.1916e+07	6.92594e+06	5.24054e+06	2.43926e+08	1.6918e+08	2.34042e+09	------	------	------	------	------	------	------	------
A0A5C2FVB0	IGL c961_light_IGKV1D-39_IGKJ2 (Fragment) OS=Homo sapiens OX=9606 PE=2 SV=1	229	7.8392	0	up	yes	4680000	0	0	0	0	8.56468e+06	0	8.83217e+06	0	0	0	0	0	1.40415e+07	0	3.95019e+07	0	0	0	0	0	0	4.13393e+06	0	1.11489e+07	0	0	0	0	8.5025e+06	5.89733e+06	3.74454e+06	0	2.01883e+07	6.67431e+06	------	------	------	------	------	------	------	------
A0A5C2FVB9	IGL c10_light_IGLV1-44_IGLJ3 (Fragment) OS=Homo sapiens OX=9606 PE=2 SV=1	229	7.8392	0	up	yes	14310000	0	9.75561e+06	0	7.55985e+06	0	0	7.76906e+06	0	2.42263e+06	0	0	0	0	0	974741	0	0	0	2.79632e+07	0	9.56052e+06	0	0	3.74029e+07	5.07513e+06	0	6.39598e+06	1.10894e+07	1.01112e+08	0	0	0	0	1.06351e+07	------	------	------	------	------	------	------	------
A0A5C2FVE4	IGL c40_light_IGKV3-20_IGKJ2 (Fragment) OS=Homo sapiens OX=9606 PE=2 SV=1	229	7.8392	0	up	yes	56370000	0	2.1596e+08	0	4.02446e+07	0	0	0	3.36134e+08	0	7.03508e+06	0	1.70243e+08	1.22996e+07	1.95036e+08	2.00656e+07	0	0	6.45908e+08	0	0	0	0	3.7658e+07	2.12572e+08	0	4.29059e+07	1.03932e+08	0	2.21544e+08	0	5.37478e+07	0	4.09877e+06	0	------	------	------	------	------	------	------	------
A0A5C2FVG1	IGL c889_light_IGKV2D-28_IGKJ2 (Fragment) OS=Homo sapiens OX=9606 PE=2 SV=1	229	7.8392	0	up	yes	1009000000	0	0	0	0	4.63722e+08	0	0	1.86318e+09	0	7.40984e+06	5.70135e+07	2.53026e+08	0	0	1.31433e+08	0	0	6.61883e+09	0	0	0	1.72033e+08	7.36128e+07	6.23699e+08	0	2.71061e+08	0	2.80533e+08	1.3141e+08	0	0	10664358163	0	6.13157e+07	------	------	------	------	------	------	------	------
A0A5C2FVI3	IGL c80_light_IGLV3-25_IGLJ2 (Fragment) OS=Homo sapiens OX=9606 PE=2 SV=1	229	7.8392	0	up	yes	19770000	0	0	1.7826e+07	0	0	0	0	0	0	2.16831e+07	0	0	0	0	4.61196e+07	0	1.5767e+07	0	0	0	0	2.95939e+07	4.4232e+07	1.71937e+07	0	0	0	1.05354e+07	1.53542e+07	2.75875e+07	0	0	2.14195e+07	1.00875e+08	------	------	------	------	------	------	------	------
A0A5C2FVQ4	IGL c1148_light_IGLV3-21_IGLJ2 (Fragment) OS=Homo sapiens OX=9606 PE=2 SV=1	229	7.8392	0	up	yes	13080000	0	0	5.53054e+06	0	0	2.24782e+07	0	0	6.66738e+06	0	0	0	0	1.01609e+07	4.34705e+06	8.3751e+06	0	0	0	0	0	3.28173e+06	0	0	1.72109e+07	3.56607e+07	2.34738e+07	1.99473e+07	0	8.60509e+06	0	5.20808e+07	0	0	------	------	------	------	------	------	------	------
A0A5C2FVR3	IGL c1091_light_IGKV3-20_IGKJ3 (Fragment) OS=Homo sapiens OX=9606 PE=2 SV=1	229	7.8392	0	up	yes	14720000	0	0	2.09308e+07	0	0	0	8.54145e+06	0	0	0	1.819e+07	0	0	5.74379e+07	0	2.75727e+07	0	0	0	0	0	0	0	1.47553e+07	0	0	1.86146e+07	3.67939e+07	2.86987e+07	0	2.61058e+07	2.83094e+07	0	2.33804e+07	------	------	------	------	------	------	------	------
A0A5C2FVR9	IGL c1101_light_IGKV1D-17_IGKJ1 (Fragment) OS=Homo sapiens OX=9606 PE=2 SV=1	229	7.8392	0	up	yes	35590000	0	0	0	0	2.35681e+07	1.73661e+07	0	1.06264e+07	0	0	9.66298e+06	2.37329e+08	0	6.3805e+06	1.14229e+07	7.84316e+06	1.71994e+07	6.17019e+06	0	0	0	0	7.04797e+06	2.73342e+08	0	3.75689e+07	0	0	7.46783e+07	0	8.4901e+06	0	2.59699e+07	0	------	------	------	------	------	------	------	------
A0A5C2FVW7	IGL c1218_light_IGKV1D-39_IGKJ5 (Fragment) OS=Homo sapiens OX=9606 PE=2 SV=1	229	7.8392	0	up	yes	27800000	0	0	0	3.21065e+06	0	0	2.2232e+07	3.31774e+07	1.29438e+07	0	4.24751e+07	2.99774e+08	0	0	6.60329e+07	0	4.83784e+06	5.94342e+06	0	0	0	0	0	1.14299e+08	0	1.19558e+08	0	1.08342e+07	4.77308e+07	0	1.16894e+07	0	0	2.94306e+07	------	------	------	------	------	------	------	------
A0A5C2FVX7	IGL c1161_light_IGKV3-20_IGKJ2 (Fragment) OS=Homo sapiens OX=9606 PE=2 SV=1	229	7.8392	0	up	yes	70300000	0	0	4.46966e+06	0	0	0	0	0	0	9.51983e+07	1.48134e+07	2.36644e+08	6.543e+07	0	2.37449e+08	0	1.63121e+07	0	0	0	0	0	1.96109e+07	2.5835e+08	0	4.73307e+08	0	1.10746e+07	1.67474e+07	0	0	0	4.89506e+06	5.96717e+07	------	------	------	------	------	------	------	------
A0A5C2FVY0	IGL c1089_light_IGLV1-40_IGLJ3 (Fragment) OS=Homo sapiens OX=9606 PE=2 SV=1	229	7.8392	0	up	yes	77560000	0	1.74035e+08	0	0	0	4.29394e+07	0	6.83951e+07	0	1.86618e+07	0	5.45369e+07	0	0	3.98861e+07	7.30414e+06	0	0	0	0	0	6.81593e+06	0	8.52667e+07	0	1.22486e+07	0	4.84836e+07	1.20473e+08	0	0	6.55052e+08	9.22785e+06	0	------	------	------	------	------	------	------	------
A0A5C2FW25	IGL c1278_light_IGKV4-1_IGKJ2 (Fragment) OS=Homo sapiens OX=9606 PE=2 SV=1	229	7.8392	0	up	yes	7602000	0	1.91342e+08	0	7.38955e+06	1.51544e+07	8.93145e+06	0	0	0	2.65725e+07	0	2.27788e+07	0	0	4.17522e+06	0	3.4688e+06	4.96187e+07	0	0	0	4.86385e+06	2.11533e+07	1.10152e+07	0	2.40332e+07	0	0	0	0	3.03148e+06	2.61948e+07	5.79816e+06	0	------	------	------	------	------	------	------	------
A0A5C2FW65	IGL c426_light_IGKV1-9_IGKJ3 (Fragment) OS=Homo sapiens OX=9606 PE=2 SV=1	229	7.8392	0	up	yes	16610000	0	0	0	0	0	0	0	4.22376e+07	0	0	0	2.4923e+07	0	0	4.29422e+07	0	0	0	0	0	0	6.18248e+07	4.25361e+07	3.68208e+06	0	1.194e+07	0	0	4.82951e+07	1.22898e+07	2.98098e+07	2.70461e+07	0	2.37307e+07	------	------	------	------	------	------	------	------
A0A5C2FW68	IGL c894_light_IGLV2-14_IGLJ1 (Fragment) OS=Homo sapiens OX=9606 PE=2 SV=1	229	7.8392	0	up	yes	9257000	0	1.18623e+07	3.85356e+06	0	0	0	0	1.24762e+07	0	1.95387e+07	0	3.6285e+07	0	0	5.35163e+07	0	2.9896e+07	0	0	0	0	1.45743e+07	1.98069e+07	2.16418e+07	0	0	7.36101e+06	0	1.9588e+07	2.22329e+07	0	1.14382e+07	9.02049e+06	0	------	------	------	------	------	------	------	------
A0A5C2FW83	IGL c1199_light_IGKV3-15_IGKJ1 (Fragment) OS=Homo sapiens OX=9606 PE=2 SV=1	229	7.8392	0	up	yes	89920000	0	0	0	0	0	0	7.77913e+07	1.35657e+08	0	4.89541e+07	0	4.47887e+08	1.02359e+08	1.67489e+07	2.39445e+08	0	1.52882e+08	0	4.39309e+07	0	0	9.9576e+07	2.12881e+08	3.05879e+08	0	9.23027e+07	0	8.98639e+07	0	1.12095e+08	0	4.69782e+07	1.69786e+07	2.02075e+08	------	------	------	------	------	------	------	------
A0A5C2FWA1	IGL c1311_light_IGLV3-9_IGLJ2 (Fragment) OS=Homo sapiens OX=9606 PE=2 SV=1	229	7.8392	0	up	yes	11540000	0	0	3.94565e+06	4.31454e+06	1.94005e+07	0	6.18287e+06	0	7.99985e+06	0	9.54768e+06	1.15507e+07	0	0	1.79899e+07	0	0	0	0	0	0	3.38808e+07	5.60106e+07	1.85124e+07	0	0	0	0	1.19949e+07	2.83338e+07	0	0	8.56995e+06	1.50813e+07	------	------	------	------	------	------	------	------
A0A5C2FWA8	IGL c1321_light_IGLV2-14_IGLJ3 (Fragment) OS=Homo sapiens OX=9606 PE=2 SV=1	229	7.8392	0	up	yes	24790000	0	0	0	0	0	0	0	0	1.23905e+07	2.74431e+07	0	2.93723e+07	0	0	1.72154e+07	0	0	0	0	9.53711e+06	0	8.36533e+07	3.05765e+06	1.78185e+08	0	0	0	5.72619e+06	0	5.36811e+06	0	0	1.03558e+07	9.47812e+07	------	------	------	------	------	------	------	------
A0A5C2FWB4	IGL c400_light_IGKV2D-28_IGKJ5 (Fragment) OS=Homo sapiens OX=9606 PE=2 SV=1	229	7.8392	0	up	yes	24310000	0	0	0	0	0	0	0	0	0	7.76674e+06	0	6.13559e+06	0	0	4.77334e+07	3.36054e+06	0	0	0	0	8.11683e+06	2.85829e+07	5.27761e+07	1.047e+08	0	0	0	8.80083e+06	8.59371e+06	8.37028e+06	4.19643e+06	7.4464e+07	1.34001e+07	1.64727e+07	------	------	------	------	------	------	------	------
A0A5C2FWC2	IGL c486_light_IGKV3-20_IGKJ2 (Fragment) OS=Homo sapiens OX=9606 PE=2 SV=1	229	7.8392	0	up	yes	23880000	0	0	0	0	0	0	0	0	0	0	0	1.22468e+08	0	0	2.39561e+07	0	0	0	0	1.30274e+07	0	1.70508e+07	2.07471e+07	4.50411e+07	1.38414e+07	0	0	2.51403e+07	0	0	0	0	1.53644e+08	2.81202e+07	------	------	------	------	------	------	------	------
A0A5C2FWF0	IGL c1361_light_IGKV3-11_IGKJ5 (Fragment) OS=Homo sapiens OX=9606 PE=2 SV=1	229	7.8392	0	up	yes	33340000	0	0	0	1.08749e+07	0	0	0	2.20648e+07	1.09033e+07	0	0	8.63634e+07	6.01413e+07	0	0	0	1.06521e+07	0	0	6.18122e+06	0	1.86284e+07	9.78509e+06	1.27444e+08	0	5.56666e+07	0	9.71191e+06	6.2154e+07	0	4.48467e+07	0	6.76138e+07	2.28102e+07	------	------	------	------	------	------	------	------
A0A5C2FWG1	IGL c526_light_IGKV3-20_IGKJ1 (Fragment) OS=Homo sapiens OX=9606 PE=2 SV=1	229	7.8392	0	up	yes	98780000	0	0	3.72424e+06	0	0	1.227e+07	3.40122e+07	0	0	0	0	0	3.72383e+06	0	6.05644e+07	0	0	0	4.38454e+06	0	1.42885e+07	0	2.31937e+07	5.43785e+06	0	1.39267e+08	0	7.53839e+06	8.0783e+06	6.27771e+06	1.66673e+07	9.02408e+08	7.64816e+07	0	------	------	------	------	------	------	------	------
A0A5C2FWT9	IGL c580_light_IGKV4-1_IGKJ1 (Fragment) OS=Homo sapiens OX=9606 PE=2 SV=1	229	7.8392	0	up	yes	36570000	0	0	0	0	0	0	4.94381e+06	2.51711e+07	2.25927e+06	0	0	7.46113e+07	0	0	8.73943e+07	0	0	0	0	0	0	1.83407e+07	0	1.96545e+08	7.77326e+06	1.79583e+08	1.64328e+07	0	0	0	0	0	1.16783e+07	2.68324e+07	------	------	------	------	------	------	------	------
A0A5C2FWX3	IGL c1531_light_IGKV4-1_IGKJ4 (Fragment) OS=Homo sapiens OX=9606 PE=2 SV=1	229	7.8392	0	up	yes	20430000	0	0	0	0	0	4.01421e+06	5.52183e+06	6.34997e+06	0	0	0	0	0	1.87239e+07	7.31504e+07	0	8.89071e+06	0	0	3.81895e+07	2.79994e+06	9.45313e+07	5.20887e+07	8.14016e+07	0	0	3.74701e+06	8.66905e+06	0	0	0	4.13614e+07	5.04478e+07	7.44589e+06	------	------	------	------	------	------	------	------
A0A5C2FWX9	IGL c1459_light_IGKV1-33_IGKJ3 (Fragment) OS=Homo sapiens OX=9606 PE=2 SV=1	229	7.8392	0	up	yes	24180000	0	0	0	0	0	1.9415e+07	0	3.79811e+07	8.87035e+06	0	0	1.49312e+08	0	0	0	0	1.54809e+08	0	0	0	0	4.96591e+07	4.02974e+07	7.83334e+07	4.3595e+06	2.50598e+07	0	3.06066e+07	0	0	4.7637e+06	3.9723e+07	3.86526e+07	2.83947e+07	------	------	------	------	------	------	------	------
A0A5C2FX10	IGL c95_light_IGLV4-69_IGLJ2 (Fragment) OS=Homo sapiens OX=9606 PE=2 SV=1	229	7.8392	0	up	yes	7171000	0	0	0	7.01803e+06	3.83622e+06	0	0	0	0	0	1.85702e+06	6.03434e+06	0	0	0	0	0	0	2.58627e+07	9.49932e+06	5.22073e+06	2.1394e+07	1.52357e+07	8.45707e+06	1.75972e+07	8.30293e+06	0	0	0	4.39211e+06	0	0	2.4116e+07	7.94825e+06	------	------	------	------	------	------	------	------
A0A5C2FX12	IGL c1372_light_IGLV3-21_IGLJ3 (Fragment) OS=Homo sapiens OX=9606 PE=2 SV=1	229	7.8392	0	up	yes	11140000	0	0	2.86179e+06	0	0	0	0	0	3.85018e+06	0	5.16543e+06	5.87605e+07	0	0	2.31373e+07	0	0	0	0	0	0	4.3013e+07	1.47141e+07	9.43989e+06	0	1.53569e+07	0	0	0	4.8688e+06	0	0	1.15784e+07	7.77654e+07	------	------	------	------	------	------	------	------
A0A5C2FX48	IGL c806_light_IGKV1-5_IGKJ2 (Fragment) OS=Homo sapiens OX=9606 PE=2 SV=1	229	7.8392	0	up	yes	26060000	0	2.13921e+08	6.76958e+06	0	1.48063e+07	4.74526e+07	1.15787e+07	0	1.47837e+07	0	116836	0	0	0	2.28498e+07	0	0	0	0	0	0	1.73653e+07	5.00221e+06	8.34051e+07	4.65699e+06	8.23352e+06	0	0	1.47366e+08	1.1598e+07	6.90061e+06	2.56957e+07	1.5864e+07	3.98797e+06	------	------	------	------	------	------	------	------
A0A5C2FX62	IGL c1442_light_IGKV1-12_IGKJ4 (Fragment) OS=Homo sapiens OX=9606 PE=2 SV=1	229	7.8392	0	up	yes	12020000	0	0	0	0	0	1.10171e+07	0	0	0	0	0	4.83494e+06	0	0	5.01356e+07	0	0	0	0	0	2.0759e+07	5.25262e+07	3.00884e+07	2.15922e+07	2.19465e+07	0	0	1.14705e+07	0	1.12902e+07	2.13663e+07	0	2.26035e+07	3.93845e+06	------	------	------	------	------	------	------	------
A0A5C2FX66	IGL c770_light_IGKV1-5_IGKJ1 (Fragment) OS=Homo sapiens OX=9606 PE=2 SV=1	229	7.8392	0	up	yes	3883000	0	0	4.48279e+06	2.67845e+06	0	0	6.17333e+06	0	1.42943e+06	8.99221e+06	0	0	4.43228e+06	0	1.12176e+07	0	0	6.36102e+06	0	0	0	2.12215e+07	1.05573e+07	1.73166e+06	3.14215e+06	0	9.55315e+06	1.25234e+07	0	0	0	4.90004e+06	4.19258e+06	0	------	------	------	------	------	------	------	------
A0A5C2FX90	IGL c1472_light_IGKV1D-39_IGKJ1 (Fragment) OS=Homo sapiens OX=9606 PE=2 SV=1	229	7.8392	0	up	yes	70580000	0	2.34266e+09	0	1.12421e+07	7.58642e+07	0	3.8698e+06	1.33734e+09	1.57894e+07	0	0	5.64838e+07	4.81524e+07	0	8.01505e+07	0	0	0	0	0	0	1.92132e+07	1.7192e+07	1.31769e+08	8.16672e+06	6.38924e+08	0	0	0	0	0	0	5.22118e+06	4.56512e+07	------	------	------	------	------	------	------	------
A0A5C2FX92	IGL c215_light_IGKV3-20_IGKJ4 (Fragment) OS=Homo sapiens OX=9606 PE=2 SV=1	229	7.8392	0	up	yes	28910000	0	0	0	0	1.57826e+07	0	2.51083e+07	4.34809e+07	0	0	6.39249e+06	2.56902e+07	0	0	3.7894e+07	0	0	8.88178e+06	2.83363e+07	3.55944e+07	0	8.42752e+07	1.03608e+07	1.83414e+08	1.78081e+07	1.95798e+07	0	7.33968e+07	0	1.44861e+07	5.42002e+06	0	1.2854e+07	9.60148e+06	------	------	------	------	------	------	------	------
A0A5C2FXH8	IGL c900_light_IGKV3-20_IGKJ2 (Fragment) OS=Homo sapiens OX=9606 PE=2 SV=1	229	7.8392	0	up	yes	35360000	0	0	0	0	0	0	0	0	0	1.62058e+07	0	2.26181e+07	0	0	0	0	0	0	0	0	0	4.13479e+07	8.37909e+06	2.17698e+07	0	4.20098e+07	3.31189e+06	0	0	0	0	0	3.40555e+08	8.3212e+06	------	------	------	------	------	------	------	------
A0A5C2FXQ9	IGL c1719_light_IGKV1-27_IGKJ2 (Fragment) OS=Homo sapiens OX=9606 PE=2 SV=1	229	7.8392	0	up	yes	22270000	0	0	0	0	3.87671e+07	0	7.2373e+06	8.96e+06	0	2.79967e+07	0	1.63109e+07	0	5.96038e+06	5.11596e+07	0	0	7.89936e+07	0	0	0	5.18642e+06	1.89797e+07	5.59073e+07	0	5.83762e+07	0	0	4.98051e+07	3.21566e+07	2.31721e+07	0	1.87854e+07	1.00399e+07	------	------	------	------	------	------	------	------
A0A5C2FXR7	IGL c1621_light_IGKV3-15_IGKJ2 (Fragment) OS=Homo sapiens OX=9606 PE=2 SV=1	229	7.8392	0	up	yes	14460000	0	2.17124e+08	0	0	0	0	0	0	0	0	0	1.05572e+07	0	7.44884e+06	3.11784e+07	0	0	0	0	0	0	9.98021e+07	2.18985e+07	5.81917e+07	0	3.05832e+07	0	0	2.38863e+07	0	3.91777e+06	0	2.35084e+07	1.15653e+07	------	------	------	------	------	------	------	------
A0A5C2FXS7	IGL c57_light_IGKV3-20_IGKJ1 (Fragment) OS=Homo sapiens OX=9606 PE=2 SV=1	229	7.8392	0	up	yes	17680000	0	4.49808e+07	0	0	1.23992e+07	6.11769e+07	0	0	0	0	6.06627e+06	1.2727e+07	9.41022e+06	0	1.12045e+07	0	5.61581e+06	1.83824e+07	0	0	0	0	3.89151e+06	1.11556e+08	0	5.31791e+07	0	0	1.92225e+07	0	0	0	4.57924e+06	1.97849e+07	------	------	------	------	------	------	------	------
A0A5C2FXU0	IGL c1761_light_IGKV3-15_IGKJ2 (Fragment) OS=Homo sapiens OX=9606 PE=2 SV=1	229	7.8392	0	up	yes	25980000	0	0	6.97629e+06	0	0	0	0	0	0	0	0	0	0	0	4.38345e+07	0	0	0	0	0	0	0	0	1.55775e+08	1.73994e+07	2.16172e+07	0	0	0	0	4.70768e+06	7.80675e+07	2.2717e+07	1.14323e+07	------	------	------	------	------	------	------	------
A0A5C2FXZ6	IGL c1100_light_IGLV2-11_IGLJ1 (Fragment) OS=Homo sapiens OX=9606 PE=2 SV=1	229	7.8392	0	up	yes	15990000	0	0	0	0	0	0	0	0	9.73032e+06	3.58065e+07	3.90673e+06	0	0	0	2.17718e+07	0	0	0	0	9.65171e+06	0	4.09347e+07	4.61408e+07	2.55422e+06	2.42963e+06	3.83631e+07	0	0	8.22026e+06	0	0	4.70633e+07	5.35334e+06	4.16988e+07	------	------	------	------	------	------	------	------
A0A5C2FY21	IGL c1928_light_IGLV3-25_IGLJ3 (Fragment) OS=Homo sapiens OX=9606 PE=2 SV=1	229	7.8392	0	up	yes	5434000	0	0	0	0	0	0	0	0	0	1.28475e+07	0	0	0	0	6.2839e+06	0	0	0	0	0	0	0	3.99604e+06	8.69095e+06	0	2.05121e+07	0	0	0	0	0	1.72374e+07	8.69339e+06	6.08293e+06	------	------	------	------	------	------	------	------
A0A5C2FY34	IGL c177_light_IGKV1-17_IGKJ2 (Fragment) OS=Homo sapiens OX=9606 PE=2 SV=1	229	7.8392	0	up	yes	5617000	0	0	1.17484e+07	7.41789e+06	0	9.16357e+06	0	0	0	1.0708e+07	0	0	0	1.89646e+07	0	0	0	0	1.19061e+07	5.09357e+06	1.26956e+07	0	8.41694e+06	1.49583e+07	7.37021e+06	0	0	9.14586e+06	0	0	0	1.27954e+07	1.47143e+07	0	------	------	------	------	------	------	------	------
A0A5C2FY62	IGL c1829_light_IGLV10-54_IGLJ3 (Fragment) OS=Homo sapiens OX=9606 PE=2 SV=1	229	7.8392	0	up	yes	25010000	0	0	0	0	0	2.54814e+06	1.94298e+06	0	3.06305e+07	1.01738e+08	0	2.95641e+07	0	0	8.91359e+07	0	3.60772e+07	0	5.01106e+07	0	0	7.97445e+06	7.80209e+07	3.22774e+07	0	5.67e+06	0	0	1.62569e+07	4.9372e+07	0	2.02983e+07	3.98965e+07	5.82943e+07	------	------	------	------	------	------	------	------
A0A5C2FYA5	IGL c1146_light_IGKV1D-33_IGKJ2 (Fragment) OS=Homo sapiens OX=9606 PE=2 SV=1	229	7.8392	0	up	yes	7569000	0	0	0	0	6.40851e+08	0	0	0	0	4.17659e+06	0	1.31962e+07	0	2.46932e+06	0	0	0	0	0	0	0	1.16794e+07	0	1.12375e+07	0	0	0	2.511e+07	1.1274e+07	6.38486e+06	4.27774e+06	1.05757e+07	9.70989e+06	1.22548e+07	------	------	------	------	------	------	------	------
A0A5C2FYB1	IGL c1156_light_IGKV3-20_IGKJ2 (Fragment) OS=Homo sapiens OX=9606 PE=2 SV=1	229	7.8392	0	up	yes	18580000	0	0	0	0	1.07306e+08	0	2.73968e+07	7.29483e+06	0	2.39296e+07	2.54835e+07	4.64206e+07	3.12854e+07	0	0	0	1.68852e+07	0	0	0	0	2.57376e+07	5.98247e+06	4.35585e+07	1.3479e+07	0	0	0	0	0	6.23297e+06	1.15966e+08	1.03592e+07	2.73795e+07	------	------	------	------	------	------	------	------
A0A5C2FYB3	IGL c2018_light_IGKV3-11_IGKJ4 (Fragment) OS=Homo sapiens OX=9606 PE=2 SV=1	229	7.8392	0	up	yes	31960000	0	0	0	0	0	5.66773e+06	0	1.00396e+07	1.64659e+07	0	6.91664e+06	1.39853e+08	0	0	0	0	0	1.35704e+07	4.33363e+07	0	0	1.72956e+07	2.53362e+07	2.193e+07	0	0	0	1.08845e+07	0	0	0	3.15661e+08	4.27829e+06	5.45307e+06	------	------	------	------	------	------	------	------
A0A5C2FYB4	IGL c257_light_IGKV1-5_IGKJ2 (Fragment) OS=Homo sapiens OX=9606 PE=2 SV=1	229	7.8392	0	up	yes	34950000	0	4.69523e+07	0	0	1.5096e+09	0	0	4.80813e+07	1.74662e+06	0	0	0	8.82193e+06	2.62702e+06	1.69244e+07	0	0	0	0	0	0	0	0	4.38103e+07	0	6.61005e+07	1.28072e+06	2.74874e+08	0	0	3.85732e+06	0	2.28007e+07	6.68244e+06	------	------	------	------	------	------	------	------
A0A5C2FYC0	IGL c1889_light_IGKV3-15_IGKJ1 (Fragment) OS=Homo sapiens OX=9606 PE=2 SV=1	229	7.8392	0	up	yes	22090000	0	0	0	0	0	0	0	1.36008e+07	0	0	0	7.0543e+07	1.0464e+07	7.65987e+06	1.57719e+07	0	0	0	0	4.51804e+06	0	1.2194e+07	0	2.18196e+07	0	8.4785e+07	3.42007e+06	4.01937e+06	0	0	0	1.0258e+08	3.7146e+07	1.132e+07	------	------	------	------	------	------	------	------
A0A5C2FYF1	IGL c1196_light_IGKV1-5_IGKJ1 (Fragment) OS=Homo sapiens OX=9606 PE=2 SV=1	229	7.8392	0	up	yes	22010000	0	0	0	0	2.38797e+07	0	1.3012e+07	0	0	0	0	6.78855e+07	0	0	7.52516e+06	0	0	0	0	0	0	1.09485e+07	7.75827e+07	2.07264e+07	0	6.5554e+07	0	1.5218e+07	1.2261e+07	3.27277e+07	0	0	1.2503e+07	2.75634e+07	------	------	------	------	------	------	------	------
A0A5C2FYI0	IGL c1290_light_IGKV1-5_IGKJ1 (Fragment) OS=Homo sapiens OX=9606 PE=2 SV=1	229	7.8392	0	up	yes	16570000	0	0	0	0	9.59764e+06	7.7815e+06	3.49842e+07	0	4.65717e+07	0	0	7.72429e+06	2.99812e+06	0	5.96173e+06	6.23785e+06	0	0	0	3.67043e+07	0	1.0749e+07	2.76069e+07	0	0	0	1.11488e+07	0	0	4.12816e+07	2.15911e+07	6.1821e+07	3.07814e+07	4.58981e+06	------	------	------	------	------	------	------	------
A0A5C2FYI2	IGL c1226_light_IGKV1-5_IGKJ1 (Fragment) OS=Homo sapiens OX=9606 PE=2 SV=1	229	7.8392	0	up	yes	51150000	0	0	3.8882e+07	0	9.40017e+07	0	8.64191e+06	3.0804e+07	0	0	0	6.48113e+07	0	2.53904e+08	2.65646e+07	3.2263e+06	0	4.51284e+08	0	0	0	1.24472e+08	2.835e+07	6.23067e+07	0	2.00555e+07	0	0	1.49376e+07	0	1.49411e+08	3.20752e+08	1.80276e+07	0	------	------	------	------	------	------	------	------
A0A5C2FYN4	IGL c1340_light_IGKV1-17_IGKJ1 (Fragment) OS=Homo sapiens OX=9606 PE=2 SV=1	229	7.8392	0	up	yes	4397000	0	0	4.42839e+06	0	0	0	0	0	0	3.96129e+06	0	0	5.07776e+06	0	0	0	0	1.32844e+07	9.44684e+06	0	0	0	1.40028e+07	0	4.5165e+06	6.30814e+06	0	0	0	1.00242e+07	9.61945e+06	0	8.28819e+06	0	------	------	------	------	------	------	------	------
A0A5C2FYS4	IGL c1814_light_IGKV3-15_IGKJ2 (Fragment) OS=Homo sapiens OX=9606 PE=2 SV=1	229	7.8392	0	up	yes	57120000	0	0	0	0	1.07676e+07	0	0	0	0	8.51067e+06	0	0	0	0	2.29069e+07	1.20759e+07	0	0	0	0	0	4.64307e+07	0	0	0	6.22157e+06	2.40583e+08	1.29928e+08	0	2.12117e+08	0	9.10882e+07	0	5.48059e+06	------	------	------	------	------	------	------	------
A0A5C2FYT3	IGL c1326_light_IGKV1-39_IGKJ1 (Fragment) OS=Homo sapiens OX=9606 PE=2 SV=1	229	7.8392	0	up	yes	9356000	0	0	4.51383e+06	0	1.53393e+07	0	1.06884e+07	0	1.28581e+06	1.20795e+07	0	5.85883e+06	0	0	0	0	0	4.04477e+06	0	0	0	1.50555e+07	0	2.55772e+07	0	0	1.86908e+07	9.47001e+06	0	0	4.21949e+06	4.89037e+07	5.40684e+06	0	------	------	------	------	------	------	------	------
A0A5C2FYZ4	IGL c2132_light_IGLV2-11_IGLJ3 (Fragment) OS=Homo sapiens OX=9606 PE=2 SV=1	229	7.8392	0	up	yes	53750000	0	0	3.93077e+06	0	0	4.8311e+07	0	0	0	0	0	6.13107e+06	0	0	5.46686e+07	0	0	0	0	1.3456e+08	0	7.9933e+06	0	4.12838e+07	0	4.45544e+07	0	6.13204e+07	0	0	0	3.11718e+07	1.56742e+07	4.5097e+08	------	------	------	------	------	------	------	------
A0A5C2FYZ9	IGL c1894_light_IGKV3-20_IGKJ1 (Fragment) OS=Homo sapiens OX=9606 PE=2 SV=1	229	7.8392	0	up	yes	57840000	0	8.53826e+07	3.86354e+06	0	1.24373e+08	5.82567e+06	0	2.19489e+08	0	0	0	2.90461e+08	0	0	0	1.06084e+07	0	2.10896e+08	0	0	0	7.98848e+06	1.21989e+07	1.16159e+08	6.85958e+06	1.47887e+07	0	3.60166e+07	1.46013e+08	5.31752e+06	0	2.91138e+08	4.88954e+07	1.66368e+07	------	------	------	------	------	------	------	------
A0A5C2FZ03	IGL c497_light_IGKV1D-17_IGKJ1 (Fragment) OS=Homo sapiens OX=9606 PE=2 SV=1	229	7.8392	0	up	yes	21260000	0	3.1852e+07	0	0	0	2.78351e+07	0	0	0	3.6752e+06	0	8.42267e+06	0	0	9.73942e+06	0	0	0	0	0	0	3.68855e+07	3.77801e+07	3.23323e+07	0	7.93036e+07	0	0	0	7.01833e+06	0	3.76333e+07	2.46514e+07	3.63573e+07	------	------	------	------	------	------	------	------
A0A5C2FZ21	IGL c905_light_IGLV2-23_IGLJ3 (Fragment) OS=Homo sapiens OX=9606 PE=2 SV=1	229	7.8392	0	up	yes	12490000	0	0	0	1.59085e+07	0	1.93911e+07	0	0	7.07081e+06	9.37729e+06	0	7.41288e+07	0	0	2.44452e+07	0	0	0	1.4051e+08	0	1.15631e+07	3.28938e+07	2.73297e+06	2.90649e+07	0	1.52932e+07	2.79548e+06	0	7.42282e+07	0	0	0	0	2.57735e+07	------	------	------	------	------	------	------	------
A0A5C2FZB6	IGL c1506_light_IGKV1-5_IGKJ1 (Fragment) OS=Homo sapiens OX=9606 PE=2 SV=1	229	7.8392	0	up	yes	98510000	0	0	9.65796e+06	0	2.11426e+08	3.06953e+06	0	0	0	2.81752e+07	0	1.29665e+08	5.76903e+06	1.65638e+08	1.23762e+08	0	0	0	0	0	0	2.01413e+08	1.10483e+08	2.03369e+08	0	2.46409e+08	1.41021e+07	4.04119e+06	0	3.51447e+07	2.92301e+07	5.43534e+06	1.06076e+08	4.27881e+08	------	------	------	------	------	------	------	------
A0A5C2FZH6	IGL c1660_light_IGLV1-40_IGLJ2 (Fragment) OS=Homo sapiens OX=9606 PE=2 SV=1	229	7.8392	0	up	yes	9994000	0	0	0	0	0	0	0	0	0	4.7618e+06	0	1.70333e+07	0	0	3.01374e+07	0	0	0	0	7.26081e+06	0	4.59462e+06	0	3.69044e+07	0	1.87926e+07	0	0	0	5.12064e+06	8.98913e+06	0	1.90574e+07	3.10646e+07	------	------	------	------	------	------	------	------
A0A5C2FZM2	IGL c2468_light_IGLV1-40_IGLJ2 (Fragment) OS=Homo sapiens OX=9606 PE=2 SV=1	229	7.8392	0	up	yes	1654000000	0	0	1.25348e+07	4.06466e+07	0	0	0	8.68415e+06	0	0	8.54392e+06	1.08243e+08	5.91321e+07	1.00313e+07	0	0	0	0	4.59079e+06	0	1.21541e+07	6.19284e+07	0	1.0636e+08	0	0	4.63733e+07	6.14477e+07	1.92423e+10	0	1.03621e+08	2.32857e+08	2.00881e+07	3.86214e+07	------	------	------	------	------	------	------	------
A0A5C2FZM5	IGL c625_light_IGKV3-11_IGKJ4 (Fragment) OS=Homo sapiens OX=9606 PE=2 SV=1	229	7.8392	0	up	yes	7261000	0	0	0	0	0	5.95677e+06	0	0	0	0	0	0	0	0	1.53101e+06	0	0	0	0	0	0	2.70728e+06	0	0	2.9607e+07	9.84925e+06	4.0845e+06	1.45868e+07	0	8.11361e+06	6.14774e+06	1.17587e+07	0	2.98412e+06	------	------	------	------	------	------	------	------
A0A5C2FZN6	IGL c2164_light_IGLV1-47_IGLJ3 (Fragment) OS=Homo sapiens OX=9606 PE=2 SV=1	229	7.8392	0	up	yes	24100000	0	0	0	3.30753e+07	2.17632e+08	3.6518e+07	4.47854e+07	0	0	1.37447e+07	1.89893e+06	0	3.68803e+07	0	1.40286e+07	0	0	0	0	0	0	0	3.17711e+07	3.8233e+06	0	3.02822e+07	0	0	1.85541e+08	1.73604e+07	0	0	2.04555e+07	0	------	------	------	------	------	------	------	------
A0A5C2FZR7	IGL c1770_light_IGKV1-12_IGKJ3 (Fragment) OS=Homo sapiens OX=9606 PE=2 SV=1	229	7.8392	0	up	yes	16720000	0	0	0	0	0	0	0	0	0	0	0	0	0	0	0	1.54563e+07	0	0	0	0	0	0	4.35057e+06	2.04372e+07	8.15672e+07	0	0	1.52477e+07	6.52799e+07	0	0	0	1.37806e+07	0	------	------	------	------	------	------	------	------
A0A5C2FZT5	IGL c2528_light_IGKV3-20_IGKJ2 (Fragment) OS=Homo sapiens OX=9606 PE=2 SV=1	229	7.8392	0	up	yes	41970000	0	0	0	1.13928e+07	0	2.64502e+07	0	0	0	3.11749e+07	0	9.25842e+07	0	0	1.359e+07	0	1.41297e+07	0	0	0	0	0	0	5.39812e+07	4.83632e+06	2.05668e+07	0	1.22966e+07	3.56697e+08	1.31086e+07	0	0	4.21415e+07	0	------	------	------	------	------	------	------	------
A0A5C2FZU0	IGL c1646_light_IGLV2-14_IGLJ1 (Fragment) OS=Homo sapiens OX=9606 PE=2 SV=1	229	7.8392	0	up	yes	44760000	0	9.12966e+07	0	0	0	0	0	1.59802e+09	0	0	0	1.69818e+07	0	0	9.065e+06	6.09183e+06	0	1.54413e+07	0	7.15233e+06	0	3.46768e+07	9.2346e+06	1.08702e+08	0	3.56229e+07	0	0	5.97143e+07	0	0	2.53363e+08	0	7.0518e+07	------	------	------	------	------	------	------	------
A0A5C2FZX7	IGL c2459_light_IGKV1-8_IGKJ5 (Fragment) OS=Homo sapiens OX=9606 PE=2 SV=1	229	7.8392	0	up	yes	17450000	0	4.74885e+07	0	7.61392e+07	0	1.44641e+07	0	0	4.97552e+07	0	0	9.27094e+07	0	8.26816e+06	4.22373e+06	0	0	3.27578e+07	0	1.60964e+07	0	0	2.83236e+06	0	4.95487e+07	5.20199e+07	3.76858e+06	0	7.34744e+07	0	5.8651e+06	0	2.1906e+07	0	------	------	------	------	------	------	------	------
A0A5C2FZY9	IGL c2274_light_IGKV1-39_IGKJ1 (Fragment) OS=Homo sapiens OX=9606 PE=2 SV=1	229	7.8392	0	up	yes	31410000	0	1.78626e+07	0	1.53195e+06	1.13093e+07	0	3.56092e+07	2.7822e+07	0	1.2973e+06	0	1.48081e+07	0	6.86059e+07	6.9947e+06	3.22527e+06	0	0	0	0	0	0	6.17608e+06	5.33335e+06	5.77323e+06	1.31863e+07	0	1.21503e+07	2.99585e+08	0	1.45299e+07	9.6271e+06	5.71573e+06	4.87544e+06	------	------	------	------	------	------	------	------
A0A5C2G073	IGL c2569_light_IGLV2-14_IGLJ2 (Fragment) OS=Homo sapiens OX=9606 PE=2 SV=1	229	7.8392	0	up	yes	4962000	0	0	0	0	0	0	0	0	0	1.78586e+07	0	0	0	0	4.29318e+07	0	1.19421e+07	0	0	0	0	0	1.18171e+07	9.89253e+06	0	4.23695e+06	3.89997e+06	0	0	3.68402e+06	0	0	1.58597e+07	1.01539e+07	------	------	------	------	------	------	------	------
A0A5C2G086	IGL c1634_light_IGKV3-20_IGKJ1 (Fragment) OS=Homo sapiens OX=9606 PE=2 SV=1	229	7.8392	0	up	yes	27110000	0	0	0	0	9.78899e+06	0	0	0	0	9.88593e+06	0	4.44867e+07	0	0	2.3244e+07	0	0	1.05365e+07	0	0	0	4.69464e+07	7.39837e+06	3.24505e+07	6.40228e+06	1.0653e+07	8.83072e+07	1.51469e+07	0	1.26913e+07	9.65657e+06	1.1553e+07	6.62372e+07	6.47814e+07	------	------	------	------	------	------	------	------
A0A5C2G095	IGL c1960_light_IGKV4-1_IGKJ1 (Fragment) OS=Homo sapiens OX=9606 PE=2 SV=1	229	7.8392	0	up	yes	17670000	0	0	0	0	2.50945e+07	0	0	0	0	0	0	0	0	0	2.33679e+07	0	0	1.06716e+07	0	0	0	0	1.68745e+07	9.69061e+07	0	0	5.98185e+07	0	2.14012e+07	0	0	7.08668e+06	0	9.92171e+06	------	------	------	------	------	------	------	------
A0A5C2G096	IGL c2651_light_IGLV2-14_IGLJ2 (Fragment) OS=Homo sapiens OX=9606 PE=2 SV=1	229	7.8392	0	up	yes	14620000	0	2.89216e+07	0	0	0	2.30453e+07	2.76856e+07	0	0	0	0	0	1.55778e+07	0	2.77918e+07	0	3.40257e+07	0	3.03001e+07	0	2.286e+07	0	2.48564e+07	4.49971e+06	0	2.92117e+07	4.99703e+06	0	1.75348e+07	6.46476e+07	0	0	2.96393e+07	0	------	------	------	------	------	------	------	------
A0A5C2G0B7	IGL c1846_light_IGLV1-40_IGLJ2 (Fragment) OS=Homo sapiens OX=9606 PE=2 SV=1	229	7.8392	0	up	yes	169900000	0	8.18603e+07	0	9.97555e+06	0	0	3.00772e+06	0	4.25169e+06	9.48886e+07	0	4.23612e+07	0	8.55965e+06	0	7.98835e+06	0	0	1.91947e+07	0	0	3.30943e+07	2.31724e+07	0	2.80106e+07	4.96142e+08	9.27504e+06	4.35006e+07	1.301e+09	7.27422e+06	1.09813e+07	5.41575e+07	2.78911e+07	3.73679e+07	------	------	------	------	------	------	------	------
A0A5C2G0D4	IGL c2718_light_IGLV1-44_IGLJ2 (Fragment) OS=Homo sapiens OX=9606 PE=2 SV=1	229	7.8392	0	up	yes	43170000	0	0	1.99039e+06	0	0	0	0	0	8.30816e+06	3.96575e+06	0	3.68468e+08	0	0	1.55074e+08	0	0	0	0	0	0	2.53379e+07	7.16072e+07	1.38467e+08	0	3.17858e+07	0	0	1.63912e+08	1.03167e+07	0	0	0	1.0191e+08	------	------	------	------	------	------	------	------
A0A5C2G0J3	IGL c1495_light_IGKV3-20_IGKJ1 (Fragment) OS=Homo sapiens OX=9606 PE=2 SV=1	229	7.8392	0	up	yes	7735000	0	0	0	0	8.10094e+06	0	0	5.28822e+07	0	0	0	3.9071e+08	0	0	1.19745e+07	0	0	1.42427e+07	0	0	6.73809e+06	1.22922e+07	5.53289e+06	5.3142e+06	1.14517e+07	0	1.73413e+07	7.07818e+06	0	0	3.09621e+07	0	1.51392e+07	0	------	------	------	------	------	------	------	------
A0A5C2G0M9	IGL c2838_light_IGLV2-11_IGLJ2 (Fragment) OS=Homo sapiens OX=9606 PE=2 SV=1	229	7.8392	0	up	yes	15040000	0	0	0	0	0	0	0	0	1.35694e+07	1.99822e+07	5.97987e+06	5.31705e+06	0	0	4.23958e+07	0	0	0	0	1.57203e+07	0	1.44235e+07	1.56897e+07	3.37568e+07	0	5.55382e+07	0	1.43985e+07	0	5.92532e+06	0	0	4.45106e+07	1.07147e+07	------	------	------	------	------	------	------	------
A0A5C2G0S1	IGL c2732_light_IGKV1-12_IGKJ5 (Fragment) OS=Homo sapiens OX=9606 PE=2 SV=1	229	7.8392	0	up	yes	33750000	0	0	0	0	1.67779e+08	0	0	8.76218e+07	1.16172e+07	0	0	3.22326e+07	0	0	6.65869e+06	0	6.94309e+07	3.81153e+07	0	0	0	0	5.10958e+07	0	0	5.57165e+07	0	0	1.05614e+07	7.12053e+06	0	2.44601e+08	1.5988e+07	1.98812e+07	------	------	------	------	------	------	------	------
A0A5C2G0T3	IGL c1989_light_IGKV3-20_IGKJ1 (Fragment) OS=Homo sapiens OX=9606 PE=2 SV=1	229	7.8392	0	up	yes	26930000	0	0	0	0	0	0	0	0	0	6.13155e+08	3.58807e+07	7.98603e+07	1.18127e+08	2.66273e+07	5.68393e+07	0	4.56017e+07	0	0	3.92938e+07	4.17862e+07	0	0	1.45987e+07	1.23205e+08	0	1.03766e+06	0	0	0	9.94539e+06	3.07373e+07	1.43633e+08	0	------	------	------	------	------	------	------	------
A0A5C2G0U2	IGL c2760_light_IGKV3D-15_IGKJ1 (Fragment) OS=Homo sapiens OX=9606 PE=2 SV=1	229	7.8392	0	up	yes	29880000	0	0	1.21885e+07	2.50351e+07	0	0	2.28019e+07	0	3.43501e+07	0	2.2761e+07	3.04034e+08	3.01847e+07	0	0	5.06233e+06	1.01141e+08	0	0	9.4763e+06	0	0	6.97357e+07	9.44156e+06	3.92126e+07	0	0	1.12779e+07	2.7027e+07	3.46255e+07	2.92628e+07	0	8.6519e+07	5.14762e+07	------	------	------	------	------	------	------	------
A0A5C2G0V2	IGL c2076_light_IGKV3-15_IGKJ2 (Fragment) OS=Homo sapiens OX=9606 PE=2 SV=1	229	7.8392	0	up	yes	15940000	0	0	0	0	0	3.68051e+07	1.52076e+07	0	7.01599e+06	7.15402e+07	0	2.89729e+08	0	0	0	0	0	3.19629e+07	0	0	2.34869e+07	1.04366e+07	2.11448e+07	0	0	0	0	1.47725e+07	0	1.20926e+07	0	5.0884e+07	8.88809e+07	3.48596e+06	------	------	------	------	------	------	------	------
A0A5C2G0V4	IGL c1107_light_IGKV3D-15_IGKJ1 (Fragment) OS=Homo sapiens OX=9606 PE=2 SV=1	229	7.8392	0	up	yes	5072000	0	0	1.13811e+06	0	0	0	8.49254e+06	0	4.03829e+06	2.35768e+07	0	4.81794e+07	0	9.63439e+06	3.0135e+07	0	0	0	0	0	0	1.08454e+07	8.18113e+06	1.98698e+06	2.68139e+07	0	1.29085e+07	0	0	0	6.76637e+06	0	4.20478e+06	0	------	------	------	------	------	------	------	------
A0A5C2G0Z1	IGL c2634_light_IGKV1-39_IGKJ5 (Fragment) OS=Homo sapiens OX=9606 PE=2 SV=1	229	7.8392	0	up	yes	36110000	0	0	0	0	2.35828e+07	0	0	0	0	0	1.48621e+07	0	1.34293e+07	0	0	1.98071e+07	0	0	2.37182e+07	0	0	3.58647e+07	9.13256e+06	1.8586e+07	0	9.13924e+07	8.20167e+06	0	2.18511e+08	0	0	7.10064e+07	2.69162e+06	1.37854e+07	------	------	------	------	------	------	------	------
A0A5C2G110	IGL c2812_light_IGLV7-46_IGLJ3 (Fragment) OS=Homo sapiens OX=9606 PE=2 SV=1	229	7.8392	0	up	yes	45020000	0	1.75297e+07	0	0	1.24484e+08	0	0	7.17796e+06	0	0	0	3.69625e+06	0	3.14789e+07	2.25392e+07	3.13727e+06	0	1.77422e+07	2.85585e+07	0	0	2.30172e+06	0	1.48034e+08	0	2.59199e+07	1.70094e+06	0	0	0	1.8392e+07	2.64873e+08	5.5064e+07	2.63124e+07	------	------	------	------	------	------	------	------
A0A5C2G144	IGL c2879_light_IGKV3-11_IGKJ1 (Fragment) OS=Homo sapiens OX=9606 PE=2 SV=1	229	7.8392	0	up	yes	7217000	0	3.05853e+07	0	0	0	3.59217e+07	1.44957e+07	0	0	0	2.82772e+07	1.80046e+07	0	2.88257e+06	5.41752e+06	0	0	4.8665e+07	0	0	1.20587e+07	5.08808e+07	8.48574e+06	0	0	2.11678e+07	0	7.11804e+06	2.62647e+07	0	0	1.32797e+07	1.02937e+07	0	------	------	------	------	------	------	------	------
A0A5C2G145	IGL c2694_light_IGKV3-20_IGKJ5 (Fragment) OS=Homo sapiens OX=9606 PE=2 SV=1	229	7.8392	0	up	yes	39370000	0	0	0	0	0	7.99881e+06	3.03104e+06	0	0	2.61792e+07	0	2.87148e+08	0	0	4.70998e+07	0	5.49904e+06	0	0	0	0	8.33254e+08	3.8154e+06	1.05318e+08	0	2.29893e+08	0	0	5.63939e+07	0	0	0	4.43435e+07	3.26585e+07	------	------	------	------	------	------	------	------
A0A5C2G146	IGL c2852_light_IGKV3-20_IGKJ2 (Fragment) OS=Homo sapiens OX=9606 PE=2 SV=1	229	7.8392	0	up	yes	13150000	0	0	0	0	0	0	0	6.2977e+07	0	0	5.95709e+06	1.01262e+08	0	0	0	1.49572e+07	0	0	0	0	0	9.67311e+06	1.48099e+07	2.33472e+07	0	3.97949e+07	0	0	4.41374e+07	1.38611e+07	0	0	1.54021e+07	6.39867e+06	------	------	------	------	------	------	------	------
A0A5C2G176	IGL c1227_light_IGKV3-11_IGKJ3 (Fragment) OS=Homo sapiens OX=9606 PE=2 SV=1	229	7.8392	0	up	yes	22750000	0	0	0	0	0	0	2.51897e+07	0	3.06998e+07	6.50006e+07	0	1.55889e+08	0	0	3.73171e+07	0	0	0	0	0	0	4.14479e+07	8.98236e+07	4.01409e+07	0	1.47307e+07	0	0	2.15218e+07	0	0	0	6.82817e+07	3.85364e+07	------	------	------	------	------	------	------	------
A0A5C2G180	IGL c83_light_IGKV3-11_IGKJ2 (Fragment) OS=Homo sapiens OX=9606 PE=2 SV=1	229	7.8392	0	up	yes	49000000	0	0	0	0	0	0	0	0	6.65557e+06	2.03999e+07	2.13408e+07	1.16122e+08	0	0	0	2.66707e+06	5.46999e+07	1.4697e+07	0	0	0	1.60306e+07	7.10374e+06	1.51107e+07	0	0	0	3.45183e+07	0	3.68473e+07	8.08341e+07	3.52702e+08	6.08941e+07	0	------	------	------	------	------	------	------	------
A0A5C2G1B1	IGL c2912_light_IGLV2-14_IGLJ1 (Fragment) OS=Homo sapiens OX=9606 PE=2 SV=1	229	7.8392	0	up	yes	25300000	0	0	0	8.13595e+06	0	0	1.77083e+07	4.78323e+07	0	1.96893e+07	0	3.96191e+06	0	8.94604e+06	1.39956e+08	6.38099e+07	0	0	0	0	1.40229e+07	1.5801e+07	3.58132e+07	9.3503e+07	4.76322e+07	6.47946e+06	4.66972e+06	3.6046e+07	0	2.83059e+07	0	0	3.66694e+07	1.45106e+07	------	------	------	------	------	------	------	------
A0A5C2G1G4	IGL c1775_light_IGLV3-19_IGLJ3 (Fragment) OS=Homo sapiens OX=9606 PE=2 SV=1	229	7.8392	0	up	yes	9647000	0	0	0	0	0	0	0	3.04056e+07	0	1.76704e+07	0	0	0	1.29123e+07	4.04606e+07	0	0	0	0	2.72431e+06	0	4.27035e+07	0	0	2.49688e+06	7.60631e+06	0	6.92521e+06	8.54931e+07	7.80794e+06	0	0	5.43119e+06	0	------	------	------	------	------	------	------	------
A0A5C2G1G9	IGL c2296_light_IGLV8-61_IGLJ3 (Fragment) OS=Homo sapiens OX=9606 PE=2 SV=1	229	7.8392	0	up	yes	8526000	0	0	6.99672e+06	5.97562e+06	0	0	5.80883e+06	0	0	0	3.82792e+06	0	7.86643e+06	0	0	0	1.19742e+07	2.17423e+08	1.42078e+07	0	0	0	2.26615e+06	0	0	0	0	2.02435e+07	1.44001e+07	1.81481e+07	6.16543e+06	0	4.10885e+07	0	------	------	------	------	------	------	------	------
A0A5C2G1H3	IGL c1317_light_IGKV1-5_IGKJ1 (Fragment) OS=Homo sapiens OX=9606 PE=2 SV=1	229	7.8392	0	up	yes	3745000	0	0	4.98684e+06	0	0	7.50494e+06	0	0	0	0	0	0	2.20073e+07	4.28656e+06	1.20584e+07	2.32708e+06	2.34454e+07	0	0	0	0	2.81125e+07	5.80076e+06	8.69463e+06	3.1351e+06	0	6.59861e+06	0	0	0	7.9561e+06	0	1.27584e+07	0	------	------	------	------	------	------	------	------
A0A5C2G1J3	IGL c3029_light_IGLV3-21_IGLJ2 (Fragment) OS=Homo sapiens OX=9606 PE=2 SV=1	229	7.8392	0	up	yes	10540000	0	1.57278e+07	0	0	1.48956e+07	0	2.94947e+06	2.34778e+07	0	0	0	1.68968e+07	2.07948e+07	1.72613e+07	5.0955e+07	0	0	0	0	0	0	5.63745e+07	7.31512e+06	1.5386e+07	5.01614e+06	0	1.54704e+07	0	0	0	0	3.72712e+07	1.81626e+07	2.78633e+07	------	------	------	------	------	------	------	------
A0A5C2G1J4	IGL c2326_light_IGKV1-39_IGKJ1 (Fragment) OS=Homo sapiens OX=9606 PE=2 SV=1	229	7.8392	0	up	yes	2555000	0	2.38645e+07	0	0	0	0	0	0	2.60643e+06	0	0	5.16527e+06	0	0	3.74628e+06	0	0	0	0	0	0	2.87051e+06	2.06716e+06	1.10379e+07	0	1.58189e+06	0	2.74558e+06	0	2.17859e+06	0	0	4.37313e+06	6.67585e+06	------	------	------	------	------	------	------	------
A0A5C2G1L6	IGL c2440_light_IGLV2-11_IGLJ1 (Fragment) OS=Homo sapiens OX=9606 PE=2 SV=1	229	7.8392	0	up	yes	64690000	0	0	2.70973e+07	1.35396e+07	0	0	0	0	1.28734e+07	4.99316e+07	2.86134e+06	3.36086e+06	0	0	5.93763e+07	0	0	0	2.16166e+07	3.26491e+07	0	1.79404e+07	4.87958e+07	2.82158e+07	0	1.27359e+08	0	1.31393e+07	3.96335e+08	0	0	0	0	1.62436e+08	------	------	------	------	------	------	------	------
A0A5C2G1P1	IGL c1387_light_IGKV4-1_IGKJ4 (Fragment) OS=Homo sapiens OX=9606 PE=2 SV=1	229	7.8392	0	up	yes	21360000	0	0	0	0	3.60522e+07	0	0	0	0	0	0	2.06278e+07	2.22508e+07	3.02162e+06	1.62344e+07	4.52791e+06	0	5.42518e+06	0	0	0	0	2.14454e+07	8.07293e+07	0	2.84252e+07	0	1.20469e+07	0	0	0	4.7103e+07	5.28835e+07	1.37455e+07	------	------	------	------	------	------	------	------
A0A5C2G1V0	IGL c313_light_IGLV6-57_IGLJ2 (Fragment) OS=Homo sapiens OX=9606 PE=2 SV=1	229	7.8392	0	up	yes	9243000	0	9.25963e+06	0	0	1.10194e+07	0	0	1.37604e+07	5.00968e+06	1.93416e+07	3.23691e+06	0	0	1.15903e+07	0	2.706e+07	0	0	0	0	0	0	4.29159e+06	6.43564e+06	0	1.89399e+07	0	9.76309e+06	1.68681e+07	0	0	5.46224e+07	0	0	------	------	------	------	------	------	------	------
A0A5C2G1X9	IGL c343_light_IGKV3-20_IGKJ1 (Fragment) OS=Homo sapiens OX=9606 PE=2 SV=1	229	7.8392	0	up	yes	340400000	0	0	0	0	2.84587e+08	7.13861e+06	0	3.19973e+08	0	0	0	2.02179e+08	0	0	6.70312e+07	0	0	6.1387e+08	0	0	5.55736e+07	2.26e+07	0	1.26431e+08	0	1.62874e+07	0	7.83707e+07	2.77222e+08	0	0	3.56292e+09	0	2.38754e+07	------	------	------	------	------	------	------	------
A0A5C2G207	IGL c1507_light_IGLV3-21_IGLJ3 (Fragment) OS=Homo sapiens OX=9606 PE=2 SV=1	229	7.8392	0	up	yes	13320000	0	0	0	0	0	0	5.52056e+06	7.05859e+07	4.7754e+06	0	0	0	0	0	2.76668e+07	0	0	0	0	0	0	4.88349e+07	1.53553e+07	9.08662e+06	6.84761e+06	1.39235e+07	0	2.22293e+07	0	9.45106e+06	0	4.51063e+07	2.47447e+07	1.309e+07	------	------	------	------	------	------	------	------
A0A5C2G228	IGL c2005_light_IGKV3-11_IGKJ4 (Fragment) OS=Homo sapiens OX=9606 PE=2 SV=1	229	7.8392	0	up	yes	510800000	0	0	3.34672e+06	0	0	1.83534e+07	0	0	0	1.84295e+07	2.41561e+07	2.50873e+09	0	0	2.20924e+07	0	0	0	0	0	0	2.7398e+07	2.54161e+07	3.03593e+08	0	4.18646e+09	3.23243e+08	0	6.45628e+07	0	8.33807e+06	0	1.4871e+07	1.20309e+09	------	------	------	------	------	------	------	------
A0A5C2G239	IGL c2516_light_IGLV2-23_IGLJ2 (Fragment) OS=Homo sapiens OX=9606 PE=2 SV=1	229	7.8392	0	up	yes	16910000	0	0	0	0	0	0	0	4.89568e+06	0	0	2.97842e+07	4.89352e+06	5.15811e+06	0	7.58605e+07	0	5.10052e+06	4.38821e+07	0	0	0	0	7.30965e+07	1.69128e+07	4.58655e+06	2.72211e+07	0	0	0	0	0	0	7.03877e+07	1.07285e+07	------	------	------	------	------	------	------	------
A0A5C2G262	IGL c423_light_IGLV2-23_IGLJ2 (Fragment) OS=Homo sapiens OX=9606 PE=2 SV=1	229	7.8392	0	up	yes	55870000	0	0	0	0	0	0	0	4.66771e+07	0	0	0	0	7.70836e+06	0	0	0	0	0	0	0	0	4.80953e+06	0	9.14415e+06	0	0	2.26073e+06	1.38679e+07	0	0	1.617e+08	4.58939e+08	0	2.45204e+07	------	------	------	------	------	------	------	------
A0A5C2G270	IGL c2045_light_IGLV2-23_IGLJ3 (Fragment) OS=Homo sapiens OX=9606 PE=2 SV=1	229	7.8392	0	up	yes	15040000	0	1.21004e+08	0	0	8.12006e+07	0	0	4.44966e+07	0	1.90328e+07	0	6.18633e+06	0	0	5.17351e+07	0	0	0	0	0	0	7.27086e+06	4.18196e+07	7.27617e+07	6.62994e+06	2.51086e+07	0	0	0	0	4.08281e+06	0	0	3.00624e+07	------	------	------	------	------	------	------	------
A0A5C2G291	IGL c453_light_IGKV3-11_IGKJ5 (Fragment) OS=Homo sapiens OX=9606 PE=2 SV=1	229	7.8392	0	up	yes	15000000	0	3.80447e+07	0	0	4.58398e+07	2.75065e+07	0	2.78538e+07	0	0	0	3.03691e+07	0	0	3.96293e+07	0	1.1879e+07	3.22459e+09	0	0	0	0	7.23676e+06	5.834e+07	0	1.71477e+07	0	1.92654e+07	0	3.2762e+07	0	0	3.82655e+07	7.01115e+06	------	------	------	------	------	------	------	------
A0A5C2G2M6	IGL c2706_light_IGKV4-1_IGKJ1 (Fragment) OS=Homo sapiens OX=9606 PE=2 SV=1	229	7.8392	0	up	yes	150000000	0	0	0	0	3.09469e+07	0	7.15415e+07	6.58184e+07	7.46984e+07	1.9593e+08	2.32757e+07	0	0	1.34727e+07	0	4.7249e+06	0	0	0	0	4.58979e+06	0	5.41356e+06	1.03009e+09	0	4.17209e+08	1.83612e+06	0	1.07382e+08	0	0	0	0	2.38306e+08	------	------	------	------	------	------	------	------
A0A5C2G2S0	IGL c2890_light_IGLV1-44_IGLJ2 (Fragment) OS=Homo sapiens OX=9606 PE=2 SV=1	229	7.8392	0	up	yes	92840000	0	0	0	1.12445e+07	0	0	0	5.7862e+07	4.48172e+07	3.76344e+07	1.52317e+07	2.14538e+08	2.73659e+07	0	4.06702e+07	0	3.12973e+07	0	0	0	0	5.4798e+07	4.66831e+07	3.98157e+08	0	5.52782e+07	2.446e+06	1.26246e+08	0	1.03674e+07	1.01876e+08	3.24541e+08	1.08131e+07	3.76675e+07	------	------	------	------	------	------	------	------
A0A5C2G2U2	IGL c2786_light_IGKV3-11_IGKJ4 (Fragment) OS=Homo sapiens OX=9606 PE=2 SV=1	229	7.8392	0	up	yes	1015000000	0	6.99762e+08	0	0	4.9773e+07	0	4.85828e+06	4.15307e+07	5.24487e+07	0	0	4.34515e+08	0	0	2.78633e+07	0	0	0	1.07827e+08	1.2336e+07	0	7.91691e+07	4.34542e+07	3.52769e+07	0	2.01281e+08	0	7.71589e+07	1.15222e+10	7.52561e+07	1.93106e+07	1.87894e+08	0	1.36589e+07	------	------	------	------	------	------	------	------
A0A5C2G2Y5	IGL c3638_light_IGKV4-1_IGKJ5 (Fragment) OS=Homo sapiens OX=9606 PE=2 SV=1	229	7.8392	0	up	yes	41370000	0	0	0	0	0	7.55427e+06	0	6.02451e+07	3.74007e+06	0	0	0	0	2.54929e+07	2.69115e+07	7.32212e+07	4.02982e+07	0	0	0	0	2.85704e+07	1.59596e+07	8.64573e+07	2.39149e+07	9.18234e+07	0	1.55599e+07	1.53231e+07	5.77498e+07	1.79326e+07	1.32792e+08	2.66549e+07	1.22368e+07	------	------	------	------	------	------	------	------
A0A5C2G2Z0	IGL c1787_light_IGKV1D-17_IGKJ2 (Fragment) OS=Homo sapiens OX=9606 PE=2 SV=1	229	7.8392	0	up	yes	9216000	0	0	0	0	0	0	0	0	0	0	0	3.83688e+07	0	0	5.93544e+06	0	0	0	0	0	0	7.33056e+06	1.71992e+07	2.24815e+07	0	1.27296e+07	0	0	0	2.01739e+07	0	0	2.95009e+07	8.50326e+06	------	------	------	------	------	------	------	------
A0A5C2G318	IGL c3542_light_IGLV2-11_IGLJ1 (Fragment) OS=Homo sapiens OX=9606 PE=2 SV=1	229	7.8392	0	up	yes	19260000	0	0	0	0	2.39103e+07	0	0	0	0	0	0	2.38782e+07	0	2.52437e+07	0	0	0	0	0	0	0	0	1.14409e+07	5.86346e+07	0	1.94694e+07	1.87517e+07	8.31472e+06	0	0	4.39328e+07	0	0	7.05734e+07	------	------	------	------	------	------	------	------
A0A5C2G320	IGL c3661_light_IGLV2-14_IGLJ2 (Fragment) OS=Homo sapiens OX=9606 PE=2 SV=1	229	7.8392	0	up	yes	28320000	0	0	0	0	0	4.29822e+06	0	1.33393e+07	5.58295e+06	7.59471e+06	0	5.26136e+07	5.40735e+06	0	4.89816e+07	0	0	0	0	0	0	5.47499e+06	4.34052e+06	4.43996e+07	0	5.12764e+06	0	0	5.93143e+07	4.38074e+07	1.13199e+07	1.60986e+08	0	1.05931e+07	------	------	------	------	------	------	------	------
A0A5C2G367	IGL c3718_light_IGKV1D-39_IGKJ4 (Fragment) OS=Homo sapiens OX=9606 PE=2 SV=1	229	7.8392	0	up	yes	13470000	0	0	0	0	0	0	0	1.56911e+07	0	0	0	1.5687e+07	0	0	4.31272e+07	0	1.01018e+07	0	0	0	0	5.90898e+06	6.66446e+07	1.60662e+07	0	3.42558e+07	0	2.08159e+07	0	0	6.6141e+06	0	0	1.72167e+07	------	------	------	------	------	------	------	------
A0A5C2G386	IGL c1887_light_IGKV1-5_IGKJ2 (Fragment) OS=Homo sapiens OX=9606 PE=2 SV=1	229	7.8392	0	up	yes	19620000	0	3.26721e+07	2.34423e+07	2.14331e+07	0	0	4.82095e+07	5.78792e+07	1.99148e+07	0	4.75352e+07	0	0	0	8.68251e+07	0	0	0	0	0	0	6.75068e+07	1.60471e+08	3.13464e+06	0	0	0	0	3.63708e+07	8.22076e+06	1.46557e+07	0	7.37724e+06	5.23945e+06	------	------	------	------	------	------	------	------
A0A5C2G3B3	IGL c3642_light_IGLV1-40_IGLJ1 (Fragment) OS=Homo sapiens OX=9606 PE=2 SV=1	229	7.8392	0	up	yes	57720000	0	6.37922e+07	3.73237e+06	0	0	6.90009e+06	0	2.48653e+07	0	1.42365e+07	0	6.78432e+07	0	0	3.95477e+07	0	3.10507e+07	0	0	0	0	3.50091e+07	2.49164e+07	3.67171e+07	7.12379e+06	1.08187e+07	5.94513e+06	3.68871e+07	4.5253e+08	1.01293e+07	0	0	9.77201e+07	9.83706e+06	------	------	------	------	------	------	------	------
A0A5C2G3H3	IGL c2495_light_IGLV2-14_IGLJ1 (Fragment) OS=Homo sapiens OX=9606 PE=2 SV=1	229	7.8392	0	up	yes	85360000	0	0	0	0	0	0	0	1.25337e+08	8.86875e+07	0	0	6.4972e+08	0	2.56931e+07	0	0	1.91673e+07	0	0	0	0	1.72203e+08	0	5.27208e+08	1.98566e+07	8.46546e+07	0	5.11626e+07	2.93761e+07	1.22031e+07	0	0	3.58737e+07	2.63986e+08	------	------	------	------	------	------	------	------
A0A5C2G3I9	IGL c3848_light_IGLV6-57_IGLJ3 (Fragment) OS=Homo sapiens OX=9606 PE=2 SV=1	229	7.8392	0	up	yes	37900000	0	3.54111e+07	0	0	0	1.07915e+07	0	0	0	0	0	1.48852e+08	0	0	1.15678e+08	0	0	0	0	0	0	2.12416e+07	4.4559e+07	2.43876e+07	0	8.16154e+07	0	0	1.88122e+08	0	0	1.11219e+07	0	1.05046e+08	------	------	------	------	------	------	------	------
A0A5C2G3P4	IGL c3911_light_IGLV2-14_IGLJ1 (Fragment) OS=Homo sapiens OX=9606 PE=2 SV=1	229	7.8392	0	up	yes	8329000	0	0	0	0	1472800670	0	0	9.87757e+08	0	1.00742e+08	0	0	0	4.30383e+06	0	0	0	0	0	0	0	4.21951e+06	0	8.2648e+06	3.89362e+06	0	0	4.31141e+06	6.05469e+07	1.15405e+07	4.22956e+06	0	0	7.15755e+06	------	------	------	------	------	------	------	------
A0A5C2G3U5	IGL c3220_light_IGLV3-27_IGLJ2 (Fragment) OS=Homo sapiens OX=9606 PE=2 SV=1	229	7.8392	0	up	yes	5411000	0	0	0	0	0	1.73221e+07	0	4.05741e+07	1.18315e+06	2.11161e+08	0	0	0	3.72872e+06	3.98899e+06	0	0	0	0	0	0	0	7.2373e+06	4.04187e+06	3.26101e+06	1.71519e+07	1.38991e+06	7.10432e+06	1.97866e+07	0	0	0	0	4.96129e+06	------	------	------	------	------	------	------	------
A0A5C2G3X2	IGL c3872_light_IGKV3-15_IGKJ2 (Fragment) OS=Homo sapiens OX=9606 PE=2 SV=1	229	7.8392	0	up	yes	56630000	0	0	0	0	0	9.33724e+06	1.56013e+07	0	0	3.09045e+07	0	9.70484e+06	8.61817e+07	8.09003e+07	6.26271e+07	0	7.33826e+07	0	0	0	7.28615e+06	0	0	9.48232e+06	2.642e+07	0	0	4.47896e+08	1.35764e+08	7.34233e+06	0	0	5.26626e+07	0	------	------	------	------	------	------	------	------
A0A5C2G3Y2	IGL c3882_light_IGKV1-5_IGKJ5 (Fragment) OS=Homo sapiens OX=9606 PE=2 SV=1	229	7.8392	0	up	yes	17590000	0	0	0	3.63413e+06	0	2.152e+07	2.94791e+06	0	4.90128e+07	0	0	0	0	0	3.91783e+07	0	8.52886e+06	0	5.39238e+07	0	5.72706e+07	5.47522e+07	2.35444e+07	5.43586e+07	0	0	0	0	7.27135e+07	1.33208e+07	8.96605e+06	0	2.732e+07	1.08457e+07	------	------	------	------	------	------	------	------
A0A5C2G3Z9	IGL c3902_light_IGLV7-43_IGLJ2 (Fragment) OS=Homo sapiens OX=9606 PE=2 SV=1	229	7.8392	0	up	yes	12530000	0	0	0	0	5.74479e+06	4.8903e+07	0	0	3.26332e+07	6.88447e+06	0	0	1.87295e+07	0	0	0	0	0	0	0	0	0	4.13224e+07	0	0	3.55495e+07	0	7.01067e+06	0	0	2.40558e+07	0	1.2583e+07	2.98065e+07	------	------	------	------	------	------	------	------
A0A5C2G409	IGL c3912_light_IGLV1-44_IGLJ3 (Fragment) OS=Homo sapiens OX=9606 PE=2 SV=1	229	7.8392	0	up	yes	19900000	0	0	0	0	0	0	1.7579e+07	0	1.04133e+07	0	0	0	0	1.39389e+07	0	0	0	0	0	0	0	0	0	2.58794e+07	1.3945e+07	0	0	1.95938e+07	1.32758e+08	2.59036e+07	2.07536e+07	0	0	0	------	------	------	------	------	------	------	------
A0A5C2G499	IGL c4121_light_IGKV4-1_IGKJ5 (Fragment) OS=Homo sapiens OX=9606 PE=2 SV=1	229	7.8392	0	up	yes	69830000	0	0	2.42357e+06	0	0	0	0	1.27243e+07	7.52933e+06	0	0	0	4.23392e+06	0	5.22853e+07	0	3.27314e+07	0	0	1.00479e+07	1.50482e+07	7.03128e+07	2.89539e+07	2.08922e+08	0	2.20085e+07	5.97634e+06	9.62146e+06	0	2.79298e+06	8.18227e+06	0	2.70086e+06	5.48844e+08	------	------	------	------	------	------	------	------
A0A5C2G4I3	IGL c2397_light_IGKV3-15_IGKJ1 (Fragment) OS=Homo sapiens OX=9606 PE=2 SV=1	229	7.8392	0	up	yes	13880000	0	2.04862e+07	0	0	3.97958e+07	0	0	2.82352e+07	0	8.73993e+06	0	1.1285e+08	0	0	2.28869e+07	0	0	0	0	0	0	2.74793e+07	0	0	0	9.69955e+06	0	0	6.96519e+07	3.14076e+07	2.4186e+06	0	4.75168e+07	5.90645e+06	------	------	------	------	------	------	------	------
A0A5C2G4I5	IGL c2855_light_IGKV3-11_IGKJ2 (Fragment) OS=Homo sapiens OX=9606 PE=2 SV=1	229	7.8392	0	up	yes	15940000	0	0	0	6.57148e+07	2.41826e+07	0	0	1.19766e+07	2.51324e+07	0	0	0	0	0	4.61825e+07	0	3.68971e+07	0	6.21517e+07	2.60221e+07	4.18431e+07	0	6.88129e+06	1.38137e+07	5.40101e+07	1.77465e+07	0	1.28494e+07	5.19869e+07	3.39643e+07	0	0	0	0	------	------	------	------	------	------	------	------
A0A5C2G4J4	IGL c1173_light_IGKV1-39_IGKJ2 (Fragment) OS=Homo sapiens OX=9606 PE=2 SV=1	229	7.8392	0	up	yes	8987000	0	0	8.04832e+06	0	0	0	0	5.46823e+07	0	0	0	3.20156e+06	0	2.22842e+06	3.21115e+06	1.12192e+06	0	0	0	0	0	0	0	4.95266e+07	0	0	348518	1.17778e+07	0	0	2.49553e+06	1.24733e+07	2.10161e+07	1.02093e+07	------	------	------	------	------	------	------	------
A0A5C2G4L2	IGL c1203_light_IGKV1D-13_IGKJ1 (Fragment) OS=Homo sapiens OX=9606 PE=2 SV=1	229	7.8392	0	up	yes	33130000	0	0	0	0	0	0	2.60066e+06	2.694e+07	0	1.55681e+07	0	4.56079e+07	2.84786e+07	0	5.05536e+07	0	4.32752e+07	0	0	0	0	4.50758e+07	1.96015e+07	4.75279e+07	0	1.05486e+08	0	0	8.77501e+07	6.41234e+07	2.02093e+07	0	0	5.28414e+07	------	------	------	------	------	------	------	------
A0A5C2G4N5	IGL c3396_light_IGLV2-14_IGLJ3 (Fragment) OS=Homo sapiens OX=9606 PE=2 SV=1	229	7.8392	0	up	yes	23650000	0	8.29203e+07	0	0	0	0	3.45537e+07	0	1.042e+07	1.83754e+07	0	6.65211e+07	0	0	5.34505e+07	0	3.53251e+07	2.08015e+07	0	0	1.04925e+07	0	4.53946e+07	7.1027e+07	0	3.20278e+07	0	0	5.56204e+07	0	0	1.8806e+07	3.58735e+07	2.4994e+07	------	------	------	------	------	------	------	------
A0A5C2G4U0	IGL c1303_light_IGLV5-45_IGLJ3 (Fragment) OS=Homo sapiens OX=9606 PE=2 SV=1	229	7.8392	0	up	yes	30900000	0	0	0	0	0	0	4.43847e+06	0	0	1.70052e+07	0	0	0	0	5.53936e+07	0	0	1.41552e+07	2.34508e+07	0	0	0	1.0397e+08	9.96265e+07	0	0	0	1.73667e+07	0	1.77444e+07	1.73066e+07	0	0	1.14734e+08	------	------	------	------	------	------	------	------
A0A5C2G5E5	IGH c216_heavy__IGHV4-59_IGHD3-16_IGHJ5 (Fragment) OS=Homo sapiens OX=9606 PE=2 SV=1	229	7.8392	0	up	yes	21040000	0	0	0	1.83732e+07	0	1.45991e+07	1.4675e+07	0	0	8.30175e+06	0	0	0	0	6.24501e+06	0	0	0	2.05424e+07	6.60568e+06	1.68742e+08	0	4.27222e+06	8.17494e+06	1.30153e+07	0	4.44684e+06	1.3349e+07	1.37175e+08	3.80064e+07	6.21685e+06	0	1.27231e+07	1.50718e+07	------	------	------	------	------	------	------	------
A0A5C2G5G6	IGL c2857_light_IGLV2-8_IGLJ1 (Fragment) OS=Homo sapiens OX=9606 PE=2 SV=1	229	7.8392	0	up	yes	11430000	0	0	7.74216e+06	0	0	0	0	0	1.48131e+07	1.26587e+07	0	3.2308e+07	0	0	2.95135e+07	0	0	0	0	0	0	0	1.42569e+07	2.80664e+07	0	4.01259e+07	1.2312e+07	0	0	0	0	0	1.93824e+07	2.30565e+07	------	------	------	------	------	------	------	------
A0A5C2G5J3	IGH c210_heavy__IGHV1-69_IGHD3-16_IGHJ6 (Fragment) OS=Homo sapiens OX=9606 PE=2 SV=1	229	7.8392	0	up	yes	5496000	0	0	0	0	0	0	5.34389e+06	0	0	0	0	3.53636e+06	0	0	0	4.40712e+06	0	0	0	0	0	0	9.11496e+06	4.57181e+06	0	8.48295e+06	1.88983e+06	3.39163e+06	0	0	0	6.73982e+06	3.94271e+06	2.78161e+07	------	------	------	------	------	------	------	------
A0A5C2G5M2	IGL c3736_light_IGKV3-15_IGKJ1 (Fragment) OS=Homo sapiens OX=9606 PE=2 SV=1	229	7.8392	0	up	yes	15080000	0	0	4.17872e+06	0	0	0	0	7.32153e+07	0	9.36556e+06	2.80744e+07	0	0	3.99062e+07	2.13472e+08	4.22753e+06	0	0	4.29752e+07	0	1.64063e+07	1.0902e+08	4.10124e+07	2.70625e+07	0	0	0	0	0	1.22078e+07	2.73094e+07	2.14663e+07	3.61403e+07	1.57134e+07	------	------	------	------	------	------	------	------
A0A5C2G5M5	IGL c3155_light_IGKV1-33_IGKJ4 (Fragment) OS=Homo sapiens OX=9606 PE=2 SV=1	229	7.8392	0	up	yes	156900000	0	0	0	0	0	0	1.19418e+08	1.45625e+08	3.88977e+07	1.67726e+06	0	2.88152e+08	0	0	3.80805e+06	2.24249e+07	1.12875e+07	0	0	0	0	1.56409e+08	6.90499e+06	4.2574e+07	0	0	7.83339e+08	0	7.21045e+06	0	3.3098e+06	1.02918e+09	0	9.79386e+06	------	------	------	------	------	------	------	------
A0A5C2G5T9	IGL c3037_light_IGKV3-20_IGKJ2 (Fragment) OS=Homo sapiens OX=9606 PE=2 SV=1	229	7.8392	0	up	yes	30740000	0	0	0	5.05662e+06	0	0	8.28688e+07	4.72997e+07	3.29896e+06	0	2.22601e+07	0	0	0	1.95863e+08	6.60211e+07	2.31241e+07	3.26282e+07	0	0	0	6.79103e+07	7.06731e+07	6.88114e+07	1.08478e+07	3.77334e+07	3.01136e+07	7.81294e+07	0	2.69042e+07	0	0	1.93394e+07	2.63274e+07	------	------	------	------	------	------	------	------
A0A5C2G5U3	IGH c77_heavy__IGHV3-73_IGHD3-16_IGHJ6 (Fragment) OS=Homo sapiens OX=9606 PE=2 SV=1	229	7.8392	0	up	yes	24850000	0	0	0	0	9.23597e+06	0	1.95577e+07	0	0	0	0	0	0	0	0	9.45201e+06	1.41196e+07	3.70772e+07	0	5.95803e+06	1.57698e+07	9.90519e+06	2.59383e+07	0	0	0	3.55821e+06	0	0	5.20041e+07	2.06452e+07	9.59998e+07	1.00111e+08	0	------	------	------	------	------	------	------	------
A0A5C2G5V9	IGH c356_heavy__IGHV3-43_IGHD3-9_IGHJ3 (Fragment) OS=Homo sapiens OX=9606 PE=2 SV=1	229	7.8392	0	up	yes	75700000	0	2.873e+07	0	0	0	0	0	4.63921e+07	0	1.86574e+07	0	0	0	0	0	8.82564e+07	0	0	0	0	1.99103e+07	2.87871e+06	1.24838e+08	4.80452e+06	0	1.19071e+07	3.76478e+06	0	7.07299e+08	8.01196e+06	0	0	3.76226e+07	1.01973e+07	------	------	------	------	------	------	------	------
A0A5C2G5Y0	IGH c360_heavy__IGHV3-33_IGHD3-22_IGHJ6 (Fragment) OS=Homo sapiens OX=9606 PE=2 SV=1	229	7.8392	0	up	yes	31940000	0	9.22697e+08	0	0	1.331e+09	0	0	6.52324e+08	4.84165e+07	0	0	0	4.731e+07	0	4.18586e+06	0	0	3.16577e+08	0	0	0	0	2.63524e+07	1.23451e+07	7.64004e+06	2.06219e+08	0	0	0	0	8.80617e+06	1.05472e+08	1.64399e+07	0	------	------	------	------	------	------	------	------
A0A5C2G5Z2	IGH c376_heavy__IGHV3-11_IGHD6-19_IGHJ5 (Fragment) OS=Homo sapiens OX=9606 PE=2 SV=1	229	7.8392	0	up	yes	26260000	0	0	7.0813e+06	1.49555e+07	0	0	0	4.33884e+07	1.40829e+07	0	6.291e+06	0	1.51497e+07	0	3.91455e+07	9.17051e+06	0	0	0	0	0	6.29339e+06	8.25562e+07	4.35493e+07	0	5.15062e+06	0	2.10683e+07	1.57088e+07	1.65504e+07	0	0	0	1.30504e+08	------	------	------	------	------	------	------	------
A0A5C2G617	IGH c127_heavy__IGHV1-69_IGHD3-22_IGHJ4 (Fragment) OS=Homo sapiens OX=9606 PE=2 SV=1	229	7.8392	0	up	yes	19350000	0	0	7.3857e+06	0	0	0	0	1.25833e+07	0	4.43472e+07	0	7.89274e+06	3.82415e+07	0	2.43334e+07	0	0	0	0	0	0	0	2.57195e+07	6.94857e+07	0	1.57937e+07	0	1.33476e+07	4.39608e+07	1.20415e+07	3.2834e+07	0	1.40563e+07	4.98967e+06	------	------	------	------	------	------	------	------
A0A5C2G618	IGH c406_heavy__IGHV3-33_IGHD3-10_IGHJ4 (Fragment) OS=Homo sapiens OX=9606 PE=2 SV=1	229	7.8392	0	up	yes	14880000	0	9.22094e+06	9.92672e+06	0	0	0	1.1772e+07	1.13847e+07	0	0	0	0	1.05565e+07	0	0	0	0	0	0	4.99129e+06	0	0	5.17907e+06	0	0	1.66745e+07	1.07804e+07	8.17863e+06	9.37104e+07	2.22915e+07	0	2.18029e+07	0	0	------	------	------	------	------	------	------	------
A0A5C2G647	IGH c42_heavy__IGHV5-51_IGHD3-10_IGHJ4 (Fragment) OS=Homo sapiens OX=9606 PE=2 SV=1	229	7.8392	0	up	yes	14060000	0	0	9.45605e+06	0	2.86551e+08	2.0046e+07	0	7.63212e+07	7.78453e+06	0	0	0	0	2.65873e+07	0	0	3.4575e+07	2.10069e+08	0	4.09924e+06	0	0	2.68829e+07	9.82249e+06	0	0	0	7.24877e+06	1.67955e+07	1.2511e+07	4.09997e+07	0	0	5.4415e+07	------	------	------	------	------	------	------	------
A0A5C2G6G1	IGL c3946_light_IGLV3-10_IGLJ3 (Fragment) OS=Homo sapiens OX=9606 PE=2 SV=1	229	7.8392	0	up	yes	31070000	0	0	0	0	0	1.03659e+07	2.11754e+07	5.34949e+07	3.26952e+07	0	1.36616e+07	1.19487e+08	0	0	7.75425e+07	0	1.95625e+07	0	0	0	8.61012e+06	7.73941e+07	6.8139e+07	1.79975e+08	0	1.18693e+07	0	3.98624e+07	0	2.52678e+07	7.87945e+06	0	2.46002e+07	1.51951e+07	------	------	------	------	------	------	------	------
A0A5C2G6J3	IGL c24_light_IGLV1-44_IGLJ1 (Fragment) OS=Homo sapiens OX=9606 PE=2 SV=1	229	7.8392	0	up	yes	36950000	0	3.6307e+07	0	0	0	0	0	2.41191e+07	0	0	0	9.49842e+07	0	0	9.60621e+06	5.96873e+06	0	0	2.72242e+07	0	0	2.65973e+06	9.20698e+06	1.19155e+08	0	0	7.93599e+06	4.29237e+06	4.20956e+07	0	0	2.49749e+08	5.55708e+06	5.37667e+06	------	------	------	------	------	------	------	------
A0A5C2G6J8	IGL c3287_light_IGKV3-20_IGKJ3 (Fragment) OS=Homo sapiens OX=9606 PE=2 SV=1	229	7.8392	0	up	yes	24490000	0	0	4.2424e+07	0	0	0	1.76792e+07	0	0	0	5.00759e+06	0	0	0	9.16672e+06	0	0	0	0	0	1.95425e+07	0	0	5.51605e+07	0	0	5.3911e+06	0	1.03408e+07	5.53972e+07	4.00396e+07	7.33208e+07	5.42199e+07	0	------	------	------	------	------	------	------	------
A0A5C2G6K5	IGL c3297_light_IGKV1D-39_IGKJ2 (Fragment) OS=Homo sapiens OX=9606 PE=2 SV=1	229	7.8392	0	up	yes	11210000	0	1.76033e+07	1.40515e+07	1.64432e+08	0	0	0	7.01419e+06	0	0	0	7.05532e+06	0	5.17198e+07	4.77634e+06	5.65047e+06	0	4.46889e+07	0	0	0	1.13736e+07	0	0	0	0	1.30329e+07	3.1724e+07	6.26398e+07	0	1.09212e+07	8.34921e+06	0	7.91264e+06	------	------	------	------	------	------	------	------
A0A5C2G6N1	IGL c3445_light_IGKV2D-29_IGKJ1 (Fragment) OS=Homo sapiens OX=9606 PE=2 SV=1	229	7.8392	0	up	yes	6283000	0	0	0	3.88512e+06	0	3.29312e+06	0	0	1.67778e+06	0	0	2.52788e+07	2.78456e+06	1.04896e+07	9.93538e+06	0	4.67582e+06	4.20392e+07	0	0	4.79975e+06	0	1.99415e+07	8.30426e+06	2.41133e+06	1.13081e+07	3.62239e+06	0	0	4.81947e+06	1.56698e+07	0	5.8401e+06	3.48365e+06	------	------	------	------	------	------	------	------
A0A5C2G6N3	IGL c18_light_IGLV3-25_IGLJ2 (Fragment) OS=Homo sapiens OX=9606 PE=2 SV=1	229	7.8392	0	up	yes	32250000	0	0	1.15838e+07	0	0	0	5.42977e+06	1.115e+07	0	2.13477e+08	0	0	0	0	9.62262e+07	0	1.40963e+07	0	0	0	0	4.79927e+07	8.73447e+07	8.01459e+07	0	8.46305e+07	0	4.69682e+06	0	1.34532e+07	0	0	2.01188e+07	9.66641e+07	------	------	------	------	------	------	------	------
A0A5C2G6P0	IGL c2093_light_IGKV1-39_IGKJ3 (Fragment) OS=Homo sapiens OX=9606 PE=2 SV=1	229	7.8392	0	up	yes	9879000	0	0	0	0	0	0	7.15408e+06	0	7.77167e+06	0	2.20606e+06	3.36346e+06	0	0	0	0	0	0	0	0	0	1.84706e+07	2.40563e+07	1.66742e+07	0	9.21878e+06	0	3.42586e+07	0	0	0	0	1.42285e+07	2.0115e+07	------	------	------	------	------	------	------	------
A0A5C2G6R5	IGL c3367_light_IGKV1-12_IGKJ5 (Fragment) OS=Homo sapiens OX=9606 PE=2 SV=1	229	7.8392	0	up	yes	16630000	0	0	5.62591e+06	0	0	0	9.48182e+06	5.21346e+07	5.68425e+06	4.22748e+06	0	2.54078e+06	0	0	0	0	0	0	0	0	0	5.17373e+07	3.59866e+07	0	0	0	3.72238e+06	0	2.39803e+07	2.92243e+07	2.67165e+07	1.9804e+07	5.81706e+07	2.00195e+06	------	------	------	------	------	------	------	------
A0A5C2G6V6	IGL c3417_light_IGKV1-39_IGKJ3 (Fragment) OS=Homo sapiens OX=9606 PE=2 SV=1	229	7.8392	0	up	yes	23810000	0	0	7.25904e+07	0	0	4.04145e+07	9.02775e+07	0	0	0	7.63642e+06	0	0	0	4.15395e+06	9.84959e+06	4.9434e+07	0	2.7622e+07	0	4.18681e+07	2.19003e+07	0	7.93632e+06	4.03473e+06	0	2.59932e+07	1.38287e+08	0	3.53734e+07	3.97825e+06	0	6.45288e+07	5.64757e+06	------	------	------	------	------	------	------	------
A0A5C2G719	IGL c234_light_IGKV3D-20_IGKJ1 (Fragment) OS=Homo sapiens OX=9606 PE=2 SV=1	229	7.8392	0	up	yes	54640000	0	1.26449e+09	0	0	7.22744e+07	0	3.57253e+07	3.92037e+08	0	0	6.51085e+06	1.23177e+07	0	5.62756e+07	0	0	0	7.865e+06	0	9.63717e+06	0	0	6.91224e+06	9.34105e+07	0	4.25176e+08	0	0	3.77387e+07	0	0	4.75973e+07	2.34167e+07	2.14636e+07	------	------	------	------	------	------	------	------
A0A5C2G743	IGL c218_light_IGLV2-14_IGLJ2 (Fragment) OS=Homo sapiens OX=9606 PE=2 SV=1	229	7.8392	0	up	yes	16530000	0	1.22915e+07	1.13329e+07	0	0	0	0	0	0	1.44864e+07	8.17368e+06	0	0	1.21238e+07	0	0	0	0	2.33914e+07	0	0	5.68071e+06	1.15053e+07	1.15656e+07	0	3.25531e+07	6.25813e+06	3.80072e+07	0	0	9.44004e+06	8.58928e+07	3.08523e+06	0	------	------	------	------	------	------	------	------
A0A5C2G752	IGL c4166_light_IGKV3-20_IGKJ4 (Fragment) OS=Homo sapiens OX=9606 PE=2 SV=1	229	7.8392	0	up	yes	9453000	0	0	0	0	0	2.32554e+07	1.16585e+07	0	0	0	0	0	1.20971e+07	0	6.69561e+07	0	4.37613e+07	0	0	0	0	1.70969e+07	1.55145e+07	2.32655e+07	0	1.66326e+07	0	1.20179e+07	0	0	7.1616e+06	0	3.88468e+07	0	------	------	------	------	------	------	------	------
A0A5C2G774	IGL c4186_light_IGLV2-11_IGLJ1 (Fragment) OS=Homo sapiens OX=9606 PE=2 SV=1	229	7.8392	0	up	yes	21200000	0	0	5.15177e+06	0	0	0	1.79206e+06	0	0	2.52951e+07	2.52719e+06	5.53366e+06	2.42258e+07	0	0	0	0	0	0	0	5.24085e+06	7.55541e+06	8.64682e+06	3.26552e+06	1.90509e+08	3.20907e+07	0	0	0	0	0	0	1.80944e+07	1.75627e+06	------	------	------	------	------	------	------	------
A0A5C2G7F5	IGL c2323_light_IGKV1-9_IGKJ3 (Fragment) OS=Homo sapiens OX=9606 PE=2 SV=1	229	7.8392	0	up	yes	22450000	0	0	0	4.40038e+06	0	0	4.11945e+06	0	0	0	1.32209e+07	1.19994e+07	0	0	2.40741e+07	0	1.80548e+07	0	8.00993e+06	0	8.12307e+06	0	1.26346e+06	3.17585e+07	0	7.53146e+07	0	2.35756e+07	9.82006e+06	6.16008e+06	9.06527e+06	1.00717e+08	1.17113e+07	0	------	------	------	------	------	------	------	------
A0A5C2G7N1	IGL c324_light_IGKV3D-20_IGKJ4 (Fragment) OS=Homo sapiens OX=9606 PE=2 SV=1	229	7.8392	0	up	yes	347600000	0	0	0	0	0	6.25401e+06	0	1.28413e+07	0	8.46075e+06	0	4.90665e+07	0	0	1.75629e+07	0	0	0	0	0	0	3.16045e+07	1.61132e+07	1.04107e+07	1.6621e+07	0	0	0	0	0	7.15312e+08	3.40222e+09	1.05946e+07	0	------	------	------	------	------	------	------	------
A0A5C2G7T7	IGL c412_light_IGKV1D-13_IGKJ4 (Fragment) OS=Homo sapiens OX=9606 PE=2 SV=1	229	7.8392	0	up	yes	70830000	0	0	0	0	0	0	0	2.04082e+08	0	0	0	1.07374e+08	0	1.74882e+07	5.02709e+07	0	0	2.57946e+08	0	4.48879e+06	0	2.21491e+08	2.28625e+08	8.67046e+07	0	1.2234e+08	0	6.40468e+06	9.5656e+07	0	0	2.55343e+08	2.04768e+07	3.43699e+07	------	------	------	------	------	------	------	------
A0A5C2G7V5	IGL c594_light_IGKV3-20_IGKJ1 (Fragment) OS=Homo sapiens OX=9606 PE=2 SV=1	229	7.8392	0	up	yes	15380000	0	0	0	0	0	0	3.78172e+06	1.01278e+08	6.199e+06	2.9274e+07	0	3.97653e+07	0	0	3.15791e+07	0	0	0	1.29045e+07	2.35561e+07	0	9.38427e+07	9.44795e+06	2.73094e+07	0	4.4369e+07	0	0	5.22115e+07	0	0	1.72604e+07	0	3.40209e+07	------	------	------	------	------	------	------	------
A0A5C2G7Y5	IGL c130_light_IGKV1D-33_IGKJ2 (Fragment) OS=Homo sapiens OX=9606 PE=2 SV=1	229	7.8392	0	up	yes	23190000	0	0	0	0	0	8.05244e+06	1.2573e+07	5.45679e+07	0	8.45024e+08	0	5.81798e+07	0	0	2.51204e+07	0	0	0	0	0	0	3.21363e+07	3.03344e+07	1.35525e+08	4.83624e+06	3.54194e+07	0	0	0	2.18353e+06	2.34333e+07	0	4.65722e+07	0	------	------	------	------	------	------	------	------
A0A5C2G7Y9	IGH c508_heavy__IGHV3-33_IGHD1-7_IGHJ4 (Fragment) OS=Homo sapiens OX=9606 PE=2 SV=1	229	7.8392	0	up	yes	18350000	0	2.22784e+07	0	5.44825e+06	0	0	5.178e+06	0	178886	0	0	0	0	4.42254e+06	1.27752e+07	0	0	7.34042e+06	0	0	0	0	0	2.4652e+07	2.52306e+07	3.84593e+07	0	1.77191e+07	7.73203e+06	3.79261e+06	1.17589e+07	1.81406e+07	2.85037e+07	4.42632e+07	------	------	------	------	------	------	------	------
A0A5C2G803	IGL c150_light_IGLV2-23_IGLJ2 (Fragment) OS=Homo sapiens OX=9606 PE=2 SV=1	229	7.8392	0	up	yes	8153000	0	9.32871e+08	0	0	2.42851e+08	0	0	4.73595e+07	0	1.4802e+07	0	0	0	1.50862e+07	1.58208e+06	0	0	1.5494e+07	0	0	0	0	1.84787e+06	2.09694e+07	0	1.65865e+07	4.04358e+06	0	0	0	4.79626e+06	4.9594e+07	0	0	------	------	------	------	------	------	------	------
A0A5C2G804	IGL c2563_light_IGKV3-15_IGKJ2 (Fragment) OS=Homo sapiens OX=9606 PE=2 SV=1	229	7.8392	0	up	yes	12640000	0	0	0	7.16874e+06	0	0	0	0	0	4.78889e+06	1.95916e+07	0	1.2436e+07	1.21872e+08	0	4.12627e+07	0	0	0	0	0	0	0	1.40433e+07	0	0	3.08052e+07	2.78834e+07	0	0	5.62919e+07	1.93479e+07	3.25704e+06	0	------	------	------	------	------	------	------	------
A0A5C2G816	IGH + IGL c16_heavy_IGHV3-48_IGHD3-3_IGHJ4 (Fragment) OS=Homo sapiens OX=9606 PE=2 SV=1	229	7.8392	0	up	yes	13970000	0	0	0	0	0	0	0	0	0	0	0	7.04214e+07	0	0	1.0074e+07	0	0	0	0	0	0	2.51698e+07	0	3.23443e+07	0	0	4.42848e+06	1.09014e+07	1.58104e+07	4.86642e+07	1.58412e+07	0	3.13344e+07	8.31546e+06	------	------	------	------	------	------	------	------
A0A5C2G857	IGH c588_heavy__IGHV4-39_IGHD3-9_IGHJ5 (Fragment) OS=Homo sapiens OX=9606 PE=2 SV=1	229	7.8392	0	up	yes	20740000	0	0	0	3.35829e+06	0	0	5.85676e+07	0	2.14946e+07	0	0	0	0	0	2.91182e+07	0	0	2.13584e+07	3.87544e+06	6.48678e+06	0	2.97928e+07	5.39221e+07	5.7408e+06	6.57756e+06	0	0	1.19079e+07	1.62657e+07	3.58403e+07	2.3605e+07	1.84624e+07	7.1445e+07	5.13852e+06	------	------	------	------	------	------	------	------
A0A5C2G8B0	IGL c36_light_IGKV1-5_IGKJ2 (Fragment) OS=Homo sapiens OX=9606 PE=2 SV=1	229	7.8392	0	up	yes	26710000	0	0	0	5.45439e+06	0	0	0	5.08443e+07	1.93603e+07	0	0	0	0	0	3.98471e+07	0	8.1954e+07	0	0	0	0	9.52985e+07	3.12498e+07	6.01008e+07	0	7.95162e+07	0	2.94004e+07	4.1529e+07	0	0	6.44375e+07	4.84546e+06	9.43342e+06	------	------	------	------	------	------	------	------
A0A5C2G8G0	IGH + IGL c100_heavy_IGHV3-33_IGHD3-16_IGHJ3 (Fragment) OS=Homo sapiens OX=9606 PE=2 SV=1	229	7.8392	0	up	yes	19320000	0	1.07815e+07	0	0	2.14351e+08	0	0	9.0062e+06	0	0	0	0	0	9.4931e+06	0	0	0	0	0	0	0	0	1.39044e+07	0	5.98952e+06	0	6.72108e+06	0	1.11299e+08	0	8.63777e+07	0	0	7.49465e+06	------	------	------	------	------	------	------	------
A0A5C2G8G7	IGL c320_light_IGKV1-5_IGKJ4 (Fragment) OS=Homo sapiens OX=9606 PE=2 SV=1	229	7.8392	0	up	yes	88490000	0	2.44837e+08	0	0	0	0	0	1.56076e+07	3.25765e+06	0	0	4.96678e+07	0	0	5.28128e+07	0	0	0	0	0	0	2.26478e+07	2.18619e+07	1.23545e+08	0	1.45954e+08	0	0	6.52083e+08	0	2.03249e+07	0	5.99068e+07	3.82035e+07	------	------	------	------	------	------	------	------
A0A5C2G8H0	IGH + IGL c110_heavy_IGHV4-4_IGHD2-2_IGHJ6 (Fragment) OS=Homo sapiens OX=9606 PE=2 SV=1	229	7.8392	0	up	yes	17460000	0	8.71915e+06	0	0	0	0	0	0	0	1.51306e+06	0	0	6.78248e+06	0	5.17057e+07	0	0	0	2.7519e+06	1.02254e+07	0	0	4.73329e+07	0	0	9.33293e+06	0	2.17559e+06	3.70667e+07	1.18466e+07	2.67357e+06	2.88405e+07	5.47002e+07	1.5554e+07	------	------	------	------	------	------	------	------
A0A5C2G8J2	IGL c3955_light_IGLV1-47_IGLJ3 (Fragment) OS=Homo sapiens OX=9606 PE=2 SV=1	229	7.8392	0	up	yes	19790000	0	0	0	0	0	1.54547e+07	0	0	1.00392e+07	4.68136e+07	5.29218e+06	5.32523e+07	0	4.20776e+06	1.68259e+07	0	7.21242e+06	0	0	0	0	1.24843e+07	2.39743e+07	4.69495e+07	0	3.53989e+07	0	0	1.57683e+07	0	0	8.971e+07	0	2.5668e+07	------	------	------	------	------	------	------	------
A0A5C2G8M2	IGL c4057_light_IGKV2D-28_IGKJ4 (Fragment) OS=Homo sapiens OX=9606 PE=2 SV=1	229	7.8392	0	up	yes	20760000	0	0	1.26499e+07	8.36688e+06	0	0	0	0	2.97881e+07	1.45027e+07	0	6.90935e+06	0	0	4.85418e+06	0	0	2.13726e+07	0	7.3972e+06	0	4.26178e+07	9.81758e+06	8.1877e+07	1.7965e+07	2.28638e+07	0	0	0	1.61338e+07	1.65956e+07	2.44138e+07	2.81913e+07	3.12167e+07	------	------	------	------	------	------	------	------
A0A5C2G8R9	IGL c205_light_IGKV4-1_IGKJ1 (Fragment) OS=Homo sapiens OX=9606 PE=2 SV=1	229	7.8392	0	up	yes	231700000	0	1.42282e+07	0	0	0	0	4.71481e+07	6.61894e+07	1.34769e+07	1.9219e+07	9.00602e+06	1.85051e+07	0	0	1.02142e+07	0	0	0	0	8.57862e+06	0	9.60755e+07	8.57967e+07	1.70527e+08	0	9.72253e+07	0	6.49877e+06	2.36091e+09	0	1.10262e+07	0	2.30018e+07	2.52818e+07	------	------	------	------	------	------	------	------
A0A5C2G903	IGL c316_light_IGKV6-21_IGKJ1 (Fragment) OS=Homo sapiens OX=9606 PE=2 SV=1	229	7.8392	0	up	yes	22510000	0	0	0	0	0	0	0	0	0	0	0	0	0	0	0	0	0	0	0	0	0	0	4.08076e+07	1.74831e+08	0	9.64205e+06	0	0	0	3.38686e+06	0	0	1.42748e+07	2.71966e+07	------	------	------	------	------	------	------	------
A0A5C2G946	IGL c335_light_IGKV1D-39_IGKJ4 (Fragment) OS=Homo sapiens OX=9606 PE=2 SV=1	229	7.8392	0	up	yes	5881000	0	0	0	0	0	0	0	1.25383e+07	0	0	0	0	7.32987e+06	0	6.84872e+06	0	0	0	0	0	0	2.29062e+07	3.43177e+06	3.1112e+07	0	0	0	0	0	9.07132e+06	8.5601e+06	0	1.11804e+07	7.21219e+06	------	------	------	------	------	------	------	------
A0A5C2G970	IGL c386_light_IGKV1-9_IGKJ1 (Fragment) OS=Homo sapiens OX=9606 PE=2 SV=1	229	7.8392	0	up	yes	85650000	0	0	0	0	0	0	3.65874e+07	9.88412e+07	4.88718e+07	0	0	0	0	0	8.03966e+07	0	1.38838e+07	0	0	0	1.10865e+07	2.94057e+07	2.5185e+07	2.01772e+08	0	4.15013e+07	0	1.23378e+07	6.86044e+08	7.17542e+06	9.25854e+06	0	4.44799e+07	0	------	------	------	------	------	------	------	------
A0A5C2G983	IGL c600_light_IGKV4-1_IGKJ4 (Fragment) OS=Homo sapiens OX=9606 PE=2 SV=1	229	7.8392	0	up	yes	13470000	0	1.21126e+07	0	8.80059e+06	0	5.91537e+06	0	8.33653e+07	0	0	0	0	0	3.71995e+06	0	1.5076e+07	0	1.14574e+07	0	0	0	5.14414e+06	0	7.12431e+07	0	0	0	1.09899e+07	0	4.45083e+06	4.91517e+07	1.63137e+07	0	9.47753e+06	------	------	------	------	------	------	------	------
A0A5C2G985	IGL c375_light_IGKV3-20_IGKJ1 (Fragment) OS=Homo sapiens OX=9606 PE=2 SV=1	229	7.8392	0	up	yes	37810000	0	5.79444e+07	0	6.94544e+06	0	0	0	1.4774e+07	0	1.28514e+08	0	9.62543e+07	9.73948e+06	0	2.83249e+07	0	2.5748e+07	0	0	0	0	4.46506e+07	9.09765e+06	5.67252e+07	0	3.46737e+07	0	0	1.72007e+08	1.00966e+08	4.25768e+07	0	1.54948e+07	2.21962e+07	------	------	------	------	------	------	------	------
A0A5C2G9I5	IGL c516_light_IGKV1D-39_IGKJ4 (Fragment) OS=Homo sapiens OX=9606 PE=2 SV=1	229	7.8392	0	up	yes	38930000	0	0	0	0	2.49683e+07	0	0	2.11203e+07	0	0	0	3.11112e+07	1.44688e+08	0	1.2475e+07	0	0	2.2955e+07	0	0	0	5.74368e+07	2.17502e+07	5.28433e+07	0	2.22999e+08	0	0	1.11643e+08	1.2145e+07	1.53319e+07	0	0	3.04855e+07	------	------	------	------	------	------	------	------
A0A5C2G9Q7	IGL c606_light_IGKV1-27_IGKJ2 (Fragment) OS=Homo sapiens OX=9606 PE=2 SV=1	229	7.8392	0	up	yes	33930000	0	0	4.0096e+07	0	2.76231e+07	0	0	0	1.67261e+07	0	2.14144e+07	0	0	0	1.01395e+07	0	0	0	0	0	9.36678e+06	1.09932e+07	2.42101e+07	3.3181e+07	1.92001e+07	0	7.09445e+07	0	2.44782e+08	6.64818e+06	0	0	8.2055e+06	0	------	------	------	------	------	------	------	------
A0A5C2GA28	IGH c115_heavy__IGHV4-39_IGHD2-21_IGHJ1 (Fragment) OS=Homo sapiens OX=9606 PE=2 SV=1	229	7.8392	0	up	yes	21380000	0	0	2.85451e+06	0	0	0	2.45109e+06	0	0	0	2.71395e+06	0	0	0	5.23663e+07	0	0	0	0	0	0	0	1.33825e+07	0	0	0	0	0	6.03019e+07	1.16981e+08	4.08461e+07	0	1.18448e+07	1.32564e+07	------	------	------	------	------	------	------	------
A0A5C2GAA8	IGH + IGL c71_heavy_IGHV1-46_IGHD6-25_IGHJ5 (Fragment) OS=Homo sapiens OX=9606 PE=2 SV=1	229	7.8392	0	up	yes	26900000	0	0	2.17727e+07	0	1.69949e+07	0	0	0	1.00247e+07	1.8724e+08	0	2.98551e+07	0	0	6.19016e+07	0	0	0	0	1.93564e+07	0	0	1.19226e+08	5.14372e+07	0	2.58345e+07	0	1.16884e+07	0	0	0	0	6.59718e+07	4.86451e+07	------	------	------	------	------	------	------	------
A0A5C2GAC1	IGH + IGL c35_light_IGLV2-23_IGLJ1 (Fragment) OS=Homo sapiens OX=9606 PE=2 SV=1	229	7.8392	0	up	yes	12550000	0	0	2.16939e+07	0	0	0	0	1.25652e+07	7.33233e+07	0	0	2.05231e+07	3.03949e+06	0	1.901e+07	0	2.99654e+07	0	0	2.03192e+06	1.71379e+07	1.82349e+07	3.8861e+07	7.30429e+06	0	1.83523e+07	0	1.23559e+07	0	1.43347e+07	0	1.16599e+07	2.7969e+07	1.98019e+07	------	------	------	------	------	------	------	------
A0A5C2GAD9	IGH + IGL c172_light_IGLV2-11_IGLJ1 (Fragment) OS=Homo sapiens OX=9606 PE=2 SV=1	229	7.8392	0	up	yes	20750000	0	0	0	0	0	2.21354e+07	0	0	0	5.18162e+06	5.72988e+06	0	0	3.80757e+06	1.19148e+07	0	0	6.67899e+06	0	0	0	3.28694e+06	6.02726e+06	7.09549e+07	0	2.63781e+07	0	0	9.51115e+07	0	0	4.1576e+07	0	8.96158e+06	------	------	------	------	------	------	------	------
A0A5C2GAE9	IGH + IGL c166_light_IGLV3-19_IGLJ3 (Fragment) OS=Homo sapiens OX=9606 PE=2 SV=1	229	7.8392	0	up	yes	17760000	0	0	0	2.79899e+07	0	0	1.5281e+07	0	2.77432e+07	0	0	0	0	0	0	0	0	0	5.10676e+07	0	3.3785e+07	0	3.87545e+07	6.70397e+07	0	3.18581e+07	0	0	0	5.11946e+07	0	0	8.88655e+06	1.54366e+07	------	------	------	------	------	------	------	------
A0A5C2GAG0	IGH + IGL c85_light_IGKV1-33_IGKJ4 (Fragment) OS=Homo sapiens OX=9606 PE=2 SV=1	229	7.8392	0	up	yes	147300000	0	5.80228e+07	7.74349e+06	0	5.16736e+06	0	0	1.43403e+08	9.60713e+06	0	7.82499e+07	8.76879e+07	0	2.44772e+06	0	0	0	9.91693e+06	0	0	0	2.06217e+08	9.56425e+07	1.74177e+08	0	5.95423e+07	0	0	6.02279e+08	0	0	7.51298e+08	0	8.52208e+07	------	------	------	------	------	------	------	------
A0A5C2GAJ1	IGH + IGL c115_light_IGKV3-11_IGKJ5 (Fragment) OS=Homo sapiens OX=9606 PE=2 SV=1	229	7.8392	0	up	yes	21380000	0	4.82554e+07	0	0	0	2.76759e+07	3.25169e+07	0	1.00147e+07	0	0	0	1.97796e+08	0	1.05248e+08	0	1.40867e+08	0	0	0	2.38352e+07	5.36486e+07	1.46438e+07	2.58072e+07	0	8.62142e+07	4.87998e+06	0	0	1.25221e+07	0	7.76724e+07	1.32194e+07	2.15655e+07	------	------	------	------	------	------	------	------
A0A5C2GAN5	IGH c363_heavy__IGHV1-69_IGHD6-19_IGHJ6 (Fragment) OS=Homo sapiens OX=9606 PE=2 SV=1	229	7.8392	0	up	yes	9741000	0	0	0	6.04035e+06	0	0	2.39601e+06	9.21816e+06	7.10896e+06	2.13763e+07	0	2.17597e+06	0	0	2.58233e+07	0	0	0	4.94259e+06	0	0	0	6.50689e+07	1.21594e+07	0	5.97653e+06	0	0	0	1.51093e+07	0	0	1.11439e+07	7.43944e+06	------	------	------	------	------	------	------	------
A0A5C2GAN8	IGL c492_light_IGLV3-21_IGLJ1 (Fragment) OS=Homo sapiens OX=9606 PE=2 SV=1	229	7.8392	0	up	yes	13900000	0	0	0	3.96396e+06	0	0	0	0	0	0	0	0	0	1.1466e+07	1.1722e+07	0	0	0	0	0	0	2.70794e+07	6.03247e+06	0	0	3.9045e+07	1.23786e+07	8.21465e+07	0	0	1.03743e+07	0	0	1.67678e+07	------	------	------	------	------	------	------	------
A0A5C2GAS8	IGH + IGL c366_heavy_IGHV3-74_IGHD2-21_IGHJ4 (Fragment) OS=Homo sapiens OX=9606 PE=2 SV=1	229	7.8392	0	up	yes	14850000	0	0	0	1.04815e+07	3.05163e+07	0	0	0	1.10798e+07	1.405e+07	0	3.31701e+07	5.78119e+06	1.4822e+07	0	2.40265e+07	0	0	0	6.06313e+07	0	2.94855e+07	0	6.57227e+07	0	0	0	2.55009e+07	0	3.99515e+07	1.33835e+07	1.99424e+07	0	1.36824e+07	------	------	------	------	------	------	------	------
A0A5C2GB13	IGH + IGL c456_heavy_IGHV5-51_IGHD1-1_IGHJ5 (Fragment) OS=Homo sapiens OX=9606 PE=2 SV=1	229	7.8392	0	up	yes	157200000	0	3.6377e+09	0	2.01417e+07	1.97312e+08	0	0	1.2427e+08	0	6.75692e+06	2.53368e+07	0	1.11192e+07	0	1.86239e+08	1.66708e+08	0	0	0	0	1.29488e+07	0	1.04228e+08	2.36914e+08	1.82178e+07	0	6.23431e+07	1.25428e+07	9.85505e+08	2.01818e+08	2.86364e+07	0	6.90188e+07	1.67629e+08	------	------	------	------	------	------	------	------
A0A5C2GBB3	IGH + IGL c496_light_IGLV1-51_IGLJ2 (Fragment) OS=Homo sapiens OX=9606 PE=2 SV=1	229	7.8392	0	up	yes	26650000	0	0	0	0	9.12659e+07	0	0	1.74025e+08	0	3.42545e+06	4.2093e+06	0	0	0	2.26321e+07	0	7.95064e+06	1.39646e+08	0	0	2.19632e+07	1.08073e+07	1.46165e+07	2.84768e+07	0	7.5125e+07	0	1.47322e+08	8.54565e+06	0	5.51236e+06	0	2.8603e+07	1.16201e+07	------	------	------	------	------	------	------	------
A0A5C2GBD7	IGH + IGL c342_heavy_IGHV4-39_IGHD6-25_IGHJ4 (Fragment) OS=Homo sapiens OX=9606 PE=2 SV=1	229	7.8392	0	up	yes	31550000	0	9.41913e+06	0	0	0	4.04304e+06	0	0	0	2.84793e+06	0	0	8.19668e+06	0	3.5117e+07	1.32503e+07	0	5.37871e+06	0	2.6116e+06	0	1.01637e+07	0	5.61855e+06	0	0	7.17597e+06	0	5.48036e+07	0	1.3902e+07	0	2.47331e+06	2.94569e+08	------	------	------	------	------	------	------	------
A0A5C2GBE1	IGH + IGL c522_light_IGKV4-1_IGKJ3 (Fragment) OS=Homo sapiens OX=9606 PE=2 SV=1	229	7.8392	0	up	yes	10240000	0	0	5.82338e+06	0	0	0	2.18196e+07	1.80048e+07	0	0	0	0	6.08714e+06	1.71439e+07	0	1.85141e+07	0	1.94317e+08	0	0	0	0	0	1.52109e+07	1.11887e+07	0	4.27845e+06	1.62747e+07	0	1.63409e+07	9.33795e+06	5.25067e+06	2.54787e+07	1.95298e+07	------	------	------	------	------	------	------	------
A0A5C2GBE8	IGH + IGL c415_light_IGLV1-40_IGLJ2 (Fragment) OS=Homo sapiens OX=9606 PE=2 SV=1	229	7.8392	0	up	yes	39610000	0	0	0	7.94837e+06	0	0	1.06378e+07	1.50011e+07	0	0	0	1.0549e+08	0	0	0	0	0	4.54063e+07	0	2.65631e+06	0	3.15753e+06	2.70949e+06	8.5397e+06	0	2.02747e+07	2.42272e+07	0	1.43323e+08	0	0	2.76265e+08	0	0	------	------	------	------	------	------	------	------
A0A5C2GBH3	IGH + IGL c552_light_IGLV1-51_IGLJ3 (Fragment) OS=Homo sapiens OX=9606 PE=2 SV=1	229	7.8392	0	up	yes	58260000	0	2.35037e+08	2.27985e+06	0	0	0	0	0	0	0	0	0	1.51079e+07	0	2.68659e+07	0	0	0	0	1.75661e+07	0	2.49949e+07	1.79346e+07	5.48736e+07	0	4.97754e+06	0	0	0	0	1.57689e+07	5.94996e+08	0	1.05798e+07	------	------	------	------	------	------	------	------
A0A5C2GBN0	IGL c121_light_IGKV3-15_IGKJ3 (Fragment) OS=Homo sapiens OX=9606 PE=2 SV=1	229	7.8392	0	up	yes	29030000	0	0	0	0	0	1.21503e+08	8.28214e+06	0	6.22299e+06	0	0	0	1.06472e+07	1.03272e+07	0	0	0	0	1.71092e+07	0	1.28644e+07	0	0	0	7.24469e+06	1.10303e+07	2.61586e+08	0	4.01192e+07	0	1.20058e+07	0	0	1.63518e+07	------	------	------	------	------	------	------	------
A0A5C2GBX2	IGH + IGL c138_light_IGKV2D-28_IGKJ4 (Fragment) OS=Homo sapiens OX=9606 PE=2 SV=1	229	7.8392	0	up	yes	18460000	0	0	0	1.46104e+07	0	4.4492e+07	1.42784e+07	0	0	0	0	1.61819e+07	0	0	7.43307e+06	0	0	0	2.55193e+07	1.13444e+07	0	0	1.09344e+07	4.93101e+07	2.40389e+07	0	0	0	4.88864e+07	1.0992e+07	0	2.50157e+07	3.45498e+07	1.78115e+07	------	------	------	------	------	------	------	------
A0A5C2GC23	IGH + IGL c123_light_IGKV3-20_IGKJ4 (Fragment) OS=Homo sapiens OX=9606 PE=2 SV=1	229	7.8392	0	up	yes	38370000	0	0	0	4.24433e+07	0	0	1.42536e+07	4.01722e+07	7.60588e+07	0	0	0	0	0	1.1953e+08	0	2.12597e+07	0	2.78266e+07	0	3.28785e+07	2.321e+08	3.26044e+07	5.69887e+07	0	7.93206e+07	1.33981e+07	2.65083e+07	1.01896e+08	1.14869e+07	5.16609e+07	2.29067e+07	5.4789e+07	8.9049e+06	------	------	------	------	------	------	------	------
A0A5C2GC74	IGL c311_light_IGKV1-5_IGKJ2 (Fragment) OS=Homo sapiens OX=9606 PE=2 SV=1	229	7.8392	0	up	yes	19210000	0	9.95405e+07	0	2.61481e+06	1.80914e+07	0	5.42095e+06	0	0	7.74243e+06	0	1.41134e+07	0	8.47658e+06	4.30111e+07	0	0	0	0	0	0	5.97552e+06	1.07577e+07	5.77722e+07	0	2.74784e+07	0	0	0	0	1.83394e+07	2.98382e+07	0	8.63701e+07	------	------	------	------	------	------	------	------
A0A5C2GCE6	IGH + IGL c348_light_IGKV2D-28_IGKJ5 (Fragment) OS=Homo sapiens OX=9606 PE=2 SV=1	229	7.8392	0	up	yes	41770000	0	0	0	3.06143e+07	0	0	0	0	0	0	2.83201e+07	0	4.04446e+07	0	1.81727e+07	0	0	1.32908e+07	0	0	0	0	1.45883e+08	3.66564e+07	0	1.04642e+08	0	0	4.28038e+07	0	8.92141e+07	1.60778e+07	2.36504e+07	4.23367e+07	------	------	------	------	------	------	------	------
A0A5C2GCL2	IGH + IGL c418_light_IGKV1-6_IGKJ3 (Fragment) OS=Homo sapiens OX=9606 PE=2 SV=1	229	7.8392	0	up	yes	31040000	0	0	0	0	0	0	1.90262e+07	0	0	0	0	0	0	0	2.09954e+06	0	3.31451e+06	0	0	0	3.83156e+06	0	6.72399e+06	4.59539e+06	0	7.61323e+07	0	9.76855e+06	0	0	2.92875e+06	0	2.72295e+08	0	------	------	------	------	------	------	------	------
A0A5C2GCU0	IGH + IGL c508_light_IGLV2-14_IGLJ3 (Fragment) OS=Homo sapiens OX=9606 PE=2 SV=1	229	7.8392	0	up	yes	23870000	0	0	0	0	0	7.61958e+06	0	6.65785e+06	0	0	0	2.89424e+07	0	0	5.74032e+07	0	0	0	0	0	0	1.17159e+07	1.31174e+07	5.77178e+07	0	0	0	0	1.25748e+08	2.19177e+07	3.10051e+06	0	6.48242e+07	0	------	------	------	------	------	------	------	------
A0A5C2GCY8	IGL c581_light_IGLV3-21_IGLJ3 (Fragment) OS=Homo sapiens OX=9606 PE=2 SV=1	229	7.8392	0	up	yes	8993000	0	1.72866e+08	4.53111e+06	0	0	1.76707e+07	0	1.30178e+08	0	1.41785e+08	0	962111	1.04231e+07	0	0	0	7.4133e+06	0	5.23851e+06	0	1.09048e+07	0	0	0	0	0	0	3.12163e+07	7.41206e+06	8.81827e+06	0	7.62511e+06	4.80403e+07	4.80221e+06	------	------	------	------	------	------	------	------
A0A5C2GD84	IGH + IGL c543_light_IGKV3-15_IGKJ2 (Fragment) OS=Homo sapiens OX=9606 PE=2 SV=1	229	7.8392	0	up	yes	47650000	0	0	0	0	0	1.23927e+07	1.48928e+07	1.69359e+07	0	0	0	3.81163e+06	5.17863e+06	0	3.22466e+07	0	0	0	0	0	0	4.62597e+06	0	0	5.69174e+06	4.58247e+07	0	4.1327e+07	3.93379e+08	0	0	4.87431e+07	0	3.68045e+07	------	------	------	------	------	------	------	------
A0A5C2GDE3	IGH + IGL c603_light_IGKV3-11_IGKJ5 (Fragment) OS=Homo sapiens OX=9606 PE=2 SV=1	229	7.8392	0	up	yes	44070000	0	0	0	0	2.67755e+07	1.88936e+07	8.23018e+06	0	0	0	0	6.07886e+08	0	0	0	0	1.68592e+07	0	0	0	0	3.39878e+07	0	8.31207e+07	0	1.45081e+08	0	0	2.03041e+08	8.23898e+06	0	5.56965e+07	3.3614e+07	0	------	------	------	------	------	------	------	------
A0A5C2GDJ9	IGH c51_heavy__IGHV3-43_IGHD3-3_IGHJ4 (Fragment) OS=Homo sapiens OX=9606 PE=2 SV=1	229	7.8392	0	up	yes	11840000	0	0	0	0	0	3.6284e+07	0	0	1.24129e+08	0	0	0	1.93123e+07	0	0	0	0	0	0	0	0	0	6.30423e+07	1.98697e+07	1.82847e+07	0	0	0	2.02626e+07	0	0	0	1.13785e+07	9.23085e+06	------	------	------	------	------	------	------	------
A0A5C2GDK1	IGH + IGL c35_light_IGKV3-11_IGKJ4 (Fragment) OS=Homo sapiens OX=9606 PE=2 SV=1	229	7.8392	0	up	yes	313900000	0	0	0	3.30567e+07	0	0	0	1.46924e+07	0	0	2.29251e+07	2.00909e+07	2.91683e+08	0	3.7922e+06	0	0	5.36285e+08	4.28078e+07	0	1.25131e+07	3.04038e+08	3.52511e+07	4.02949e+07	1.93333e+07	0	3.60436e+06	0	3.5899e+09	1.29592e+07	1.21525e+07	0	1.30231e+07	4.07652e+07	------	------	------	------	------	------	------	------
A0A5C2GDK6	IGH + IGL c45_light_IGLV1-44_IGLJ2 (Fragment) OS=Homo sapiens OX=9606 PE=2 SV=1	229	7.8392	0	up	yes	5793000	0	0	0	0	0	0	4.43653e+06	0	3.43696e+06	0	4.29377e+06	0	0	0	0	0	0	0	0	0	6.55769e+06	0	1.56615e+07	2.50435e+07	4.41074e+06	0	0	5.023e+06	0	1.20674e+07	0	0	7.3148e+06	0	------	------	------	------	------	------	------	------
A0A5C2GDM9	IGH c71_heavy__IGHV3-7_IGHD4-23_IGHJ3 (Fragment) OS=Homo sapiens OX=9606 PE=2 SV=1	229	7.8392	0	up	yes	20360000	0	1.14381e+07	0	2.13327e+07	0	1.318e+07	0	0	2.03323e+07	0	2.69852e+07	0	1.10283e+07	1.90112e+06	0	0	0	0	5.89557e+06	0	0	2.01344e+07	2.40252e+07	1.70452e+07	0	0	0	7.8333e+06	1.21318e+08	5.31697e+07	0	0	1.34174e+07	7.54432e+06	------	------	------	------	------	------	------	------
A0A5C2GDU1	IGH + IGL c270_light_IGLV2-14_IGLJ3 (Fragment) OS=Homo sapiens OX=9606 PE=2 SV=1	229	7.8392	0	up	yes	15610000	0	0	0	0	0	0	0	1.22395e+08	0	0	0	0	0	7.99366e+07	0	0	0	0	0	0	0	0	3.56286e+07	2.02906e+07	1.20664e+07	0	7.16073e+06	5.4434e+06	9.96491e+07	0	0	0	0	7.07543e+06	------	------	------	------	------	------	------	------
A0A5C2GDU6	IG c1122_heavy_IGHV3-13_IGHD2-15_IGHJ6 (Fragment) OS=Homo sapiens OX=9606 PE=2 SV=1	229	7.8392	0	up	yes	12260000	0	0	0	0	0	0	0	0	0	0	0	0	0	0	1.80613e+07	0	0	0	0	0	0	0	2.6688e+07	8.60073e+06	0	0	0	0	0	1.34597e+07	0	6.37007e+07	3.04764e+07	4.22143e+06	------	------	------	------	------	------	------	------
A0A5C2GDV9	IG c1211_heavy_IGHV3-20_IGHD6-13_IGHJ4 (Fragment) OS=Homo sapiens OX=9606 PE=2 SV=1	229	7.8392	0	up	yes	405300000	0	0	0	6.14702e+06	2.55482e+08	0	0	3.64293e+07	0	0	0	0	0	0	1.86977e+07	2.48627e+07	0	2.09565e+08	1.29443e+07	1.13841e+07	1.4732e+07	1.27652e+07	4.04159e+07	6.79001e+07	0	1.28459e+08	0	0	4.58104e+09	1.37178e+07	0	0	2.27462e+07	8.7897e+06	------	------	------	------	------	------	------	------
A0A5C2GDW3	IGH + IGL c109_heavy_IGHV3-11_IGHD3-10_IGHJ4 (Fragment) OS=Homo sapiens OX=9606 PE=2 SV=1	229	7.8392	0	up	yes	7125000	0	0	0	0	3.67223e+09	2.15587e+07	0	0	5.33175e+06	0	0	0	0	0	3.70904e+06	0	0	0	0	0	0	0	2.80331e+07	2.99666e+07	5.57749e+06	4.34544e+06	0	0	0	1.45157e+07	0	0	0	3.05629e+06	------	------	------	------	------	------	------	------
A0A5C2GE02	IGH + IGL c267_heavy_IGHV1-2_IGHD3-22_IGHJ3 (Fragment) OS=Homo sapiens OX=9606 PE=2 SV=1	229	7.8392	0	up	yes	6270000	0	0	0	0	6.21858e+07	6.37311e+06	0	0	7.49186e+06	0	4.30809e+06	0	0	0	3.00929e+06	0	0	0	0	0	0	0	2.02294e+07	1.67251e+07	0	0	2.18499e+06	0	0	1.27924e+07	0	1.42124e+07	0	9.09716e+06	------	------	------	------	------	------	------	------
A0A5C2GE26	IG c1327_heavy_IGHV3-21_IGHD3-3_IGHJ6 (Fragment) OS=Homo sapiens OX=9606 PE=2 SV=1	229	7.8392	0	up	yes	18900000	0	0	0	0	0	0	7.2232e+06	0	0	2.28961e+07	0	1.02972e+07	0	0	1.14012e+07	0	0	2.22669e+07	0	0	2.97235e+07	0	2.96671e+07	1.10368e+07	0	0	0	4.62901e+07	1.64237e+07	0	1.39668e+07	3.85175e+07	4.36877e+07	2.72176e+07	------	------	------	------	------	------	------	------
A0A5C2GE27	IG c1244_heavy_IGHV3-21_IGHD3-22_IGHJ4 (Fragment) OS=Homo sapiens OX=9606 PE=2 SV=1	229	7.8392	0	up	yes	51290000	0	0	0	0	0	6.96057e+06	4.85444e+07	6.52491e+06	7.12139e+07	0	1.16009e+07	2.42216e+07	0	0	8.6337e+07	0	3.45997e+06	0	2.16915e+07	0	0	9.03937e+06	2.0049e+08	4.40834e+07	0	1.03386e+07	0	0	4.54396e+07	1.11318e+08	0	0	1.2883e+08	7.49374e+07	------	------	------	------	------	------	------	------
A0A5C2GE35	IG c68_heavy_IGHV3-23_IGHD2-15_IGHJ4 (Fragment) OS=Homo sapiens OX=9606 PE=2 SV=1	229	7.8392	0	up	yes	22020000	0	0	0	3.89018e+06	0	0	0	0	0	0	0	0	0	0	1.72874e+07	0	0	0	0	0	0	0	3.98853e+07	7.41286e+07	0	2.24655e+07	1.43997e+07	9.94017e+06	0	0	0	0	6.08235e+07	4.26572e+07	------	------	------	------	------	------	------	------
A0A5C2GE58	IG c273_heavy_IGHV3-23_IGHD3-22_IGHJ5 (Fragment) OS=Homo sapiens OX=9606 PE=2 SV=1	229	7.8392	0	up	yes	12080000	0	0	4.5811e+06	0	0	0	0	0	0	2.75567e+07	1.68673e+07	0	0	0	3.02369e+07	0	0	0	0	0	0	1.96837e+07	4.81968e+07	2.11648e+07	0	2.23188e+07	3.75508e+06	0	0	0	0	0	1.18377e+07	3.77343e+07	------	------	------	------	------	------	------	------
A0A5C2GEF2	IGH + IGL c500_light_IGKV3-20_IGKJ1 (Fragment) OS=Homo sapiens OX=9606 PE=2 SV=1	229	7.8392	0	up	yes	15760000	0	0	0	2.91634e+06	0	0	0	5.2001e+07	0	0	0	1.4337e+07	0	3.05109e+06	2.15017e+07	0	0	0	0	0	0	0	5.6658e+06	4.09334e+06	0	1.57122e+07	3.67201e+06	1.00218e+08	9.76178e+06	0	1.62511e+07	1.32377e+07	2.05575e+07	0	------	------	------	------	------	------	------	------
A0A5C2GEI8	IGH c441_heavy__IGHV3-72_IGHD3-22_IGHJ4 (Fragment) OS=Homo sapiens OX=9606 PE=2 SV=1	229	7.8392	0	up	yes	23350000	0	0	0	0	2.42074e+07	0	0	0	0	0	0	6.36781e+06	0	0	1.63927e+07	0	0	0	0	0	0	0	5.07905e+07	4.4897e+07	0	1.19281e+08	0	0	0	1.15679e+07	0	0	3.02044e+07	2.34254e+07	------	------	------	------	------	------	------	------
A0A5C2GEM2	IGH + IGL c507_heavy_IGHV4-39_IGHD2-8_IGHJ2 (Fragment) OS=Homo sapiens OX=9606 PE=2 SV=1	229	7.8392	0	up	yes	63580000	0	0	0	0	0	0	0	0	0	0	0	3.99268e+06	3.96561e+07	0	0	6.26522e+06	0	0	0	0	0	0	7.45153e+06	5.00032e+06	0	0	0	0	6.96143e+08	1.16762e+07	0	0	9.70897e+06	3.29294e+07	------	------	------	------	------	------	------	------
A0A5C2GEM9	IGH + IGL c590_light_IGKV1-39_IGKJ5 (Fragment) OS=Homo sapiens OX=9606 PE=2 SV=1	229	7.8392	0	up	yes	17900000	0	1.41973e+07	0	0	0	0	1.29186e+07	6.63931e+07	0	0	0	1.59993e+07	0	0	2.15827e+07	3.32067e+06	0	0	0	0	0	1.55507e+08	9.36584e+06	4.82998e+06	0	5.15248e+07	0	0	5.07854e+07	6.39553e+06	3.16642e+06	8.21314e+07	6.62063e+06	0	------	------	------	------	------	------	------	------
A0A5C2GEN2	IGH + IGL c517_heavy_IGHV2-70_IGHD4-17_IGHJ4 (Fragment) OS=Homo sapiens OX=9606 PE=2 SV=1	229	7.8392	0	up	yes	136200000	0	0	0	2.90397e+07	0	0	2.24827e+07	1.8143e+07	2.06139e+07	0	0	0	0	0	1.90318e+07	0	0	0	0	0	0	6.39233e+07	1.07123e+08	1.52744e+07	0	0	0	0	1.35941e+09	7.56088e+07	2.54427e+07	0	5.1682e+07	0	------	------	------	------	------	------	------	------
A0A5C2GER0	IGH + IGL c620_light_IGKV3-11_IGKJ5 (Fragment) OS=Homo sapiens OX=9606 PE=2 SV=1	229	7.8392	0	up	yes	31340000	0	5.99058e+07	0	9.85327e+06	0	0	0	0	0	0	0	5.51101e+06	5.79392e+06	0	0	0	0	1.38825e+08	1.63027e+07	0	0	0	1.47451e+07	6.88844e+06	0	0	1.97077e+07	0	7.33792e+07	0	3.27055e+06	2.53879e+08	0	4.15771e+06	------	------	------	------	------	------	------	------
A0A5C2GET5	IG c120_heavy_IGHV3-49_IGHD2-2_IGHJ3 (Fragment) OS=Homo sapiens OX=9606 PE=2 SV=1	229	7.8392	0	up	yes	20030000	0	0	0	0	0	8.42117e+06	0	0	3.40946e+07	8.51067e+06	9.12975e+06	2.46247e+07	0	0	3.54216e+07	0	0	0	0	5.7286e+06	0	2.63791e+07	3.98219e+07	2.85666e+07	0	1.60873e+07	0	0	2.13884e+07	4.35801e+07	5.72958e+06	0	7.24625e+07	1.27209e+07	------	------	------	------	------	------	------	------
A0A5C2GF06	IG c1227_heavy_IGHV1-18_IGHD4-23_IGHJ4 (Fragment) OS=Homo sapiens OX=9606 PE=2 SV=1	229	7.8392	0	up	yes	27850000	0	0	0	0	4.59478e+07	0	2.95565e+06	0	0	1.42721e+07	3.71424e+06	1.68304e+07	0	0	0	6.61544e+06	0	1.65406e+08	0	0	7.80788e+06	0	6.89644e+07	6.16278e+06	3.92484e+06	1.47806e+07	2.02392e+07	0	1.13685e+08	0	5.17504e+06	1.01297e+08	0	0	------	------	------	------	------	------	------	------
A0A5C2GF46	IG c1011_heavy_IGHV3-7_IGHD3-3_IGHJ1 (Fragment) OS=Homo sapiens OX=9606 PE=2 SV=1	229	7.8392	0	up	yes	41450000	0	0	2.79113e+07	5.57357e+06	0	0	4.43982e+07	7.14895e+07	1.58516e+07	5.75107e+07	0	3.23654e+07	0	0	4.20274e+07	0	0	1.31864e+07	0	0	8.33249e+06	0	7.2587e+07	1.71609e+08	0	3.20149e+07	0	0	0	7.92927e+06	0	0	8.60494e+07	1.27201e+08	------	------	------	------	------	------	------	------
A0A5C2GFC9	IG c153_heavy_IGHV3-23_IGHD1-7_IGHJ4 (Fragment) OS=Homo sapiens OX=9606 PE=2 SV=1	229	7.8392	0	up	yes	23810000	0	5.3608e+07	0	1.16137e+07	0	0	0	3.53278e+07	3.14466e+07	2.5332e+07	0	1.7288e+08	0	0	2.01091e+07	1.1057e+07	0	0	0	0	0	1.3722e+07	8.7029e+07	2.17086e+07	0	0	9.7087e+06	8.83505e+06	0	2.74196e+07	0	4.09396e+07	3.2962e+07	5.71541e+07	------	------	------	------	------	------	------	------
A0A5C2GFQ7	IG c599_heavy_IGHV4-34_IGHD2-21_IGHJ4 (Fragment) OS=Homo sapiens OX=9606 PE=2 SV=1	229	7.8392	0	up	yes	20130000	0	0	0	0	1.1314e+07	0	0	0	4.74777e+06	0	4.2981e+06	0	0	1.10106e+07	5.13493e+07	0	4.8382e+07	0	1.96836e+07	0	1.04674e+07	0	4.38821e+07	5.03878e+07	0	7.02354e+06	3.33421e+07	2.64009e+07	0	5.50249e+06	2.5962e+07	0	2.54957e+07	2.35931e+07	------	------	------	------	------	------	------	------
A0A5C2GFR0	IG c141_heavy_IGHV3-13_IGHD3-10_IGHJ6 (Fragment) OS=Homo sapiens OX=9606 PE=2 SV=1	229	7.8392	0	up	yes	7488000	0	0	0	0	1.01399e+07	2.6158e+06	3.97947e+06	0	2.89395e+06	9.53882e+07	0	0	6.39632e+06	0	0	1.11534e+07	0	0	0	0	0	1.03553e+07	2.6272e+07	1.9184e+07	0	1.76181e+07	7.28969e+06	8.36234e+06	9.64495e+06	0	0	0	1.48184e+06	0	------	------	------	------	------	------	------	------
A0A5C2GFX1	IG c914_heavy_IGHV3-21_IGHD6-13_IGHJ4 (Fragment) OS=Homo sapiens OX=9606 PE=2 SV=1	229	7.8392	0	up	yes	17450000	0	1.25416e+08	0	0	0	0	2.20526e+07	0	0	3.3458e+07	0	4.51193e+07	0	0	3.83271e+07	0	0	2.82588e+07	0	0	0	7.28361e+06	3.55947e+07	0	0	3.01758e+07	0	0	8.20208e+07	8.83326e+06	1.48723e+07	3.78658e+07	0	0	------	------	------	------	------	------	------	------
A0A5C2GG86	IG c359_heavy_IGHV3-30_IGHD3-22_IGHJ4 (Fragment) OS=Homo sapiens OX=9606 PE=2 SV=1	229	7.8392	0	up	yes	6687000	0	0	3.13495e+06	0	0	1.20137e+07	0	3.12452e+07	0	6.21564e+07	0	0	1.32637e+08	3.08361e+06	0	0	3.34211e+07	5.54542e+06	8.30793e+06	0	0	0	6.52021e+06	0	1.17388e+07	0	1.25171e+07	7.21424e+06	1.72807e+07	1.09927e+07	0	0	8.84991e+06	5.12461e+06	------	------	------	------	------	------	------	------
A0A5C2GGJ2	IG c379_heavy_IGHV4-31_IGHD5-12_IGHJ4 (Fragment) OS=Homo sapiens OX=9606 PE=2 SV=1	229	7.8392	0	up	yes	9158000	0	0	0	0	0	0	0	0	7.28011e+06	0	0	0	0	0	6.7378e+06	0	0	0	0	0	0	0	1.57193e+07	9.16485e+06	0	1.19498e+07	0	0	4.48794e+07	8.82043e+06	0	0	4.93009e+06	1.44322e+07	------	------	------	------	------	------	------	------
A0A5C2GGQ6	IGH + IGL c7_heavy_IGHV4-31_IGHD2-8_IGHJ4 (Fragment) OS=Homo sapiens OX=9606 PE=2 SV=1	229	7.8392	0	up	yes	33020000	0	1.46328e+07	0	0	0	0	0	1.16056e+07	9.5091e+06	0	0	0	0	0	0	0	0	0	0	1.50742e+07	0	1.27791e+07	2.32233e+07	0	0	3.65664e+07	0	5.704e+06	2.34392e+08	5.55424e+06	1.36316e+07	0	7.71857e+07	0	------	------	------	------	------	------	------	------
A0A5C2GGS9	IG c79_heavy_IGHV3-23_IGHD5-24_IGHJ5 (Fragment) OS=Homo sapiens OX=9606 PE=2 SV=1	229	7.8392	0	up	yes	23510000	0	1.3798e+08	2.37152e+07	0	0	0	0	2.69281e+07	0	6.39536e+06	0	0	1.01729e+07	0	7.18137e+06	0	0	3.21541e+07	8.53388e+07	0	7.3199e+07	0	4.4784e+07	4.42458e+07	0	0	9.98222e+06	8.28851e+06	0	8.35456e+07	1.716e+07	0	5.21821e+07	2.19723e+07	------	------	------	------	------	------	------	------
A0A5C2GGU6	IGH + IGL c1_light_IGKV3-15_IGKJ4 (Fragment) OS=Homo sapiens OX=9606 PE=2 SV=1	229	7.8392	0	up	yes	76710000	0	0	4.26325e+06	0	0	0	2.34856e+08	2.01653e+07	4.12492e+07	1.40617e+07	0	9.6379e+07	0	0	5.88537e+07	0	1.12231e+07	0	0	0	2.22218e+07	4.54661e+07	3.24575e+06	5.69182e+08	7.80703e+06	1.14439e+08	0	0	7.69225e+07	0	6.26657e+07	0	3.16416e+07	5.46582e+07	------	------	------	------	------	------	------	------
A0A5C2GGX1	IG c704_heavy_IGHV3-23_IGHD2-2_IGHJ6 (Fragment) OS=Homo sapiens OX=9606 PE=2 SV=1	229	7.8392	0	up	yes	9036000	0	9.46272e+06	3.54471e+07	0	0	0	0	0	0	0	0	0	1.47781e+07	1.29517e+07	0	0	0	0	0	0	0	0	2.07268e+07	0	0	0	7.54057e+06	0	0	2.08105e+07	1.48996e+07	3.96885e+07	0	4.76648e+06	------	------	------	------	------	------	------	------
A0A5C2GGZ2	IG c1306_light_IGLV6-57_IGLJ3 (Fragment) OS=Homo sapiens OX=9606 PE=2 SV=1	229	7.8392	0	up	yes	28860000	0	0	0	0	0	0	0	1.55421e+07	4.4942e+07	0	211121	0	1.8056e+07	2.74507e+06	4.26844e+07	200763	5.84769e+07	0	0	0	7.47078e+07	1.23191e+06	4.1741e+07	1.76879e+08	0	2.95578e+07	0	1.12982e+07	2.2334e+06	1.85572e+07	3.46436e+06	0	6.25763e+07	0	------	------	------	------	------	------	------	------
A0A5C2GGZ9	IGH + IGL c461_light_IGKV1-16_IGKJ4 (Fragment) OS=Homo sapiens OX=9606 PE=2 SV=1	229	7.8392	0	up	yes	24480000	0	0	7.0165e+06	3.21117e+07	0	0	0	0	0	9.57372e+06	0	2.93069e+07	0	0	1.27433e+07	0	0	9.96962e+06	0	0	1.6754e+08	2.65072e+07	1.04883e+07	5.00773e+07	0	1.62234e+08	4.90493e+06	0	0	3.30735e+07	2.59991e+06	0	5.7356e+06	2.45898e+07	------	------	------	------	------	------	------	------
A0A5C2GHB5	IG c626_heavy_IGHV3-53_IGHD6-13_IGHJ3 (Fragment) OS=Homo sapiens OX=9606 PE=2 SV=1	229	7.8392	0	up	yes	7952000	0	0	0	7.06566e+06	1.34926e+07	8.81074e+06	0	0	8.11906e+06	0	0	0	0	0	1.22023e+07	0	0	0	0	0	0	7.59042e+06	2.48168e+07	5.0864e+06	1.80155e+07	9.41855e+06	0	0	1.50762e+07	1.02167e+07	0	0	1.27934e+07	0	------	------	------	------	------	------	------	------
A0A5C2GHC0	IGH + IGL c581_light_IGKV3-15_IGKJ1 (Fragment) OS=Homo sapiens OX=9606 PE=2 SV=1	229	7.8392	0	up	yes	55410000	0	0	0	0	0	0	6.03265e+07	7.84689e+07	2.05847e+07	6.02779e+06	0	4.86186e+07	0	0	9.20534e+07	0	3.89701e+07	0	5.65711e+07	0	5.61355e+07	8.2637e+07	2.37122e+07	3.64575e+08	4.43282e+06	3.54902e+07	0	0	0	3.25612e+06	1.44066e+08	0	4.56271e+07	4.3725e+07	------	------	------	------	------	------	------	------
A0A5C2GHE5	IG c1425_heavy_IGHV4-59B_IGHD4-23_IGHJ4 (Fragment) OS=Homo sapiens OX=9606 PE=2 SV=1	229	7.8392	0	up	yes	323000000	0	0	5.78002e+06	4.85145e+06	0	0	5.24432e+06	4.97302e+07	1.60481e+07	0	0	0	0	0	2.61988e+07	0	0	2.17717e+07	0	2.3547e+06	0	1.11409e+07	0	2.16417e+07	0	0	0	9.15676e+06	5.11304e+07	1.50938e+07	0	3.71955e+09	5.52959e+07	3.54948e+06	------	------	------	------	------	------	------	------
A0A5C2GHU5	IGH + IGL c315_heavy_IGHV3-11_IGHD3-3_IGHJ2 (Fragment) OS=Homo sapiens OX=9606 PE=2 SV=1	229	7.8392	0	up	yes	17650000	0	0	7.97682e+06	1.0065e+07	0	0	0	1.22784e+07	3.44021e+07	0	0	9.22772e+06	0	0	8.13561e+06	0	4.25678e+06	0	0	0	0	4.91985e+06	3.48484e+07	1.5139e+07	0	7.22854e+07	0	4.30371e+07	0	9.36861e+06	5.16596e+06	0	3.19058e+07	0	------	------	------	------	------	------	------	------
A0A5C2GI26	IG c576_light_IGLV1-47_IGLJ3 (Fragment) OS=Homo sapiens OX=9606 PE=2 SV=1	229	7.8392	0	up	yes	38010000	0	0	0	0	0	0	0	7.94196e+07	3.16791e+07	9.01291e+07	5.08585e+07	858835	4.51194e+06	0	1.21754e+08	0	1.32107e+07	0	0	0	0	3.42159e+07	7.12557e+07	1.38863e+08	0	6.77265e+07	0	0	1.36579e+07	0	1.2234e+07	0	5.93209e+07	9.30753e+07	------	------	------	------	------	------	------	------
A0A5C2GI34	IG c798_light_IGKV1-5_IGKJ2 (Fragment) OS=Homo sapiens OX=9606 PE=2 SV=1	229	7.8392	0	up	yes	4615000	0	0	0	0	0	0	0	0	0	0	0	1.50159e+07	0	1.44945e+07	1.51755e+07	8.64441e+06	7.90786e+06	0	0	0	0	0	5.67448e+06	8.21719e+06	0	0	4.14622e+06	0	0	4.04707e+06	1.18623e+07	1.54449e+07	5.99134e+06	0	------	------	------	------	------	------	------	------
A0A5C2GI59	IGH + IGL c435_heavy_IGHV1-2_IGHD5-12_IGHJ4 (Fragment) OS=Homo sapiens OX=9606 PE=2 SV=1	229	7.8392	0	up	yes	24650000	0	0	0	6.8912e+06	0	0	2.15902e+06	7.38823e+06	2.66074e+07	1.79549e+07	0	1.26979e+07	0	5.45751e+06	7.73314e+07	3.20047e+06	0	0	0	0	0	0	1.12197e+08	4.86013e+07	0	7.08222e+06	0	0	0	2.59008e+07	5.56134e+06	2.15588e+07	6.80326e+07	6.81068e+06	------	------	------	------	------	------	------	------
A0A5C2GIE8	IG c819_light_IGKV1-27_IGKJ3 (Fragment) OS=Homo sapiens OX=9606 PE=2 SV=1	229	7.8392	0	up	yes	9905000	0	0	0	0	0	0	4.27202e+06	1.14907e+07	0	0	0	0	2.20703e+07	0	0	0	1.11059e+07	0	0	0	1.87009e+07	0	0	0	0	4.51314e+07	0	4.83462e+07	7.27344e+06	0	0	1.07865e+07	4.7524e+06	2.56604e+06	------	------	------	------	------	------	------	------
A0A5C2GIF5	IG c1133_light_IGKV1D-33_IGKJ5 (Fragment) OS=Homo sapiens OX=9606 PE=2 SV=1	229	7.8392	0	up	yes	53480000	0	0	0	0	0	0	0	8.2913e+07	0	6.12013e+06	9.69533e+06	0	0	0	7.93896e+07	0	0	0	0	0	2.27119e+07	1.32446e+08	4.39532e+07	1.94799e+08	0	1.96393e+07	0	2.18963e+07	0	2.2886e+07	1.39961e+07	0	2.61426e+07	2.98425e+08	------	------	------	------	------	------	------	------
A0A5C2GII4	IG c1174_heavy_IGHV1-18_IGHD4-17_IGHJ4 (Fragment) OS=Homo sapiens OX=9606 PE=2 SV=1	229	7.8392	0	up	yes	10930000	0	0	0	0	0	0	0	0	0	0	0	7.53464e+06	0	0	0	0	0	0	0	1.13968e+07	0	0	5.02916e+07	1.02156e+07	0	1.06091e+07	0	0	1.48531e+07	1.4772e+07	0	0	1.25488e+07	1.78827e+07	------	------	------	------	------	------	------	------
A0A5C2GIL1	IG c1299_heavy_IGHV4-59_IGHD2-21_IGHJ4 (Fragment) OS=Homo sapiens OX=9606 PE=2 SV=1	229	7.8392	0	up	yes	23090000	0	0	2.77964e+07	2.12087e+06	1.7548e+07	0	1.4933e+06	0	0	5.04963e+06	0	0	9.04241e+07	3.2892e+06	0	0	0	3.29818e+07	3.69153e+06	0	1.84947e+07	0	0	7.18514e+07	0	4.38174e+07	4.30308e+06	0	7.58925e+07	1.63705e+07	1.69794e+07	0	5.31872e+06	4.26041e+07	------	------	------	------	------	------	------	------
A0A5C2GIP1	IG c897_light_IGLV3-21_IGLJ2 (Fragment) OS=Homo sapiens OX=9606 PE=2 SV=1	229	7.8392	0	up	yes	13640000	0	0	0	0	0	0	0	3.15196e+07	1.23564e+07	0	1.68436e+07	0	0	4.07412e+06	1.02765e+08	1.34584e+08	0	0	0	7.50902e+06	0	8.67607e+07	5.52724e+07	1.73424e+07	0	0	0	0	3.88511e+07	2.04485e+07	5.56245e+06	0	1.25697e+07	1.36262e+07	------	------	------	------	------	------	------	------
A0A5C2GIP6	IG c921_heavy_IGHV3-15_IGHD3-16_IGHJ4 (Fragment) OS=Homo sapiens OX=9606 PE=2 SV=1	229	7.8392	0	up	yes	47470000	0	0	0	0	0	0	0	6.78053e+07	0	0	0	0	0	1.72788e+07	2.25612e+07	0	0	1.63052e+08	0	0	0	0	4.44837e+07	2.04365e+07	0	0	0	0	3.16936e+07	0	2.25213e+07	4.35199e+08	0	1.53359e+07	------	------	------	------	------	------	------	------
A0A5C2GIQ7	IG c885_light_IGLV1-47_IGLJ3 (Fragment) OS=Homo sapiens OX=9606 PE=2 SV=1	229	7.8392	0	up	yes	9172000	0	1.64614e+08	0	0	1.55977e+09	0	0	0	0	2.00178e+07	0	1.77437e+08	0	9.03042e+06	5.85629e+06	0	0	0	0	0	0	0	1.87601e+07	2.30805e+07	0	2.00572e+07	0	0	0	0	8.1888e+06	0	1.76922e+07	2.229e+07	------	------	------	------	------	------	------	------
A0A5C2GIY6	IG c673_light_IGKV3-11_IGKJ4 (Fragment) OS=Homo sapiens OX=9606 PE=2 SV=1	229	7.8392	0	up	yes	7662000	0	0	0	7.02332e+06	0	2.18345e+07	0	0	6.48524e+06	0	0	1.0245e+07	7.97288e+06	0	0	0	2.69164e+07	0	1.16075e+07	0	1.23758e+07	0	3.10518e+07	1.27714e+07	0	0	1.51356e+07	7.51628e+06	0	1.2021e+07	0	0	1.34523e+07	0	------	------	------	------	------	------	------	------
A0A5C2GJB1	IG c45_light_IGKV3-20_IGKJ2 (Fragment) OS=Homo sapiens OX=9606 PE=2 SV=1	229	7.8392	0	up	yes	13490000	0	0	0	4.08567e+07	0	0	0	0	3.3927e+07	1.55012e+07	0	0	0	0	7.78054e+06	3.14188e+06	0	3.3121e+07	0	0	0	3.90523e+07	0	7.47597e+06	0	2.56699e+07	0	5.35072e+07	5.62642e+07	0	1.42611e+07	0	4.67337e+06	0	------	------	------	------	------	------	------	------
A0A5C2GJB5	IG c38_light_IGLV9-49_IGLJ3 (Fragment) OS=Homo sapiens OX=9606 PE=2 SV=1	229	7.8392	0	up	yes	114300000	0	0	0	1.48615e+07	0	0	3.65476e+07	0	4.00766e+07	2.06338e+07	2.89532e+07	4.29782e+06	5.09598e+06	0	6.19214e+07	0	0	0	6.03107e+07	0	1.34981e+07	0	2.9982e+08	1.05105e+08	2.71915e+07	3.36125e+07	2.75788e+08	3.2008e+07	4.32044e+07	7.41897e+07	0	0	6.55378e+07	4.14691e+08	------	------	------	------	------	------	------	------
A0A5C2GJE0	IG c1293_light_IGLV1-51_IGLJ3 (Fragment) OS=Homo sapiens OX=9606 PE=2 SV=1	229	7.8392	0	up	yes	12970000	0	4.30477e+06	7.05689e+06	0	0	0	8.40593e+06	0	5.15452e+06	1.81682e+07	4.79883e+06	0	1.27435e+07	0	7.67029e+06	0	1.38227e+07	0	0	0	0	9.65693e+06	2.22579e+07	8.67432e+07	3.64861e+06	0	0	0	0	0	1.45102e+07	0	2.32439e+07	5.21541e+06	------	------	------	------	------	------	------	------
A0A5C2GJN5	IG c514_light_IGKV1-27_IGKJ1 (Fragment) OS=Homo sapiens OX=9606 PE=2 SV=1	229	7.8392	0	up	yes	68350000	0	0	0	0	0	1.39251e+08	0	0	0	0	0	0	0	0	0	0	7.39395e+07	0	0	0	0	0	1.84579e+07	0	1.45091e+08	0	0	0	5.07946e+08	0	0	7.99672e+07	5.99538e+07	8.77439e+06	------	------	------	------	------	------	------	------
A0A5C2GJR6	IG c1143_heavy_IGHV3-23_IGHD1-26_IGHJ6 (Fragment) OS=Homo sapiens OX=9606 PE=2 SV=1	229	7.8392	0	up	yes	24620000	0	0	0	0	0	6.05741e+06	7.25499e+06	0	0	4.53815e+07	0	1.31874e+07	0	0	2.1914e+07	0	0	0	5.2625e+07	0	1.69968e+07	7.13083e+06	3.40364e+07	1.48804e+07	0	5.91373e+06	0	0	1.74452e+08	1.65607e+07	0	0	2.64474e+07	2.3168e+07	------	------	------	------	------	------	------	------
A0A5C2GJS6	IG c115_light_IGKV3-11_IGKJ4 (Fragment) OS=Homo sapiens OX=9606 PE=2 SV=1	229	7.8392	0	up	yes	11340000	0	0	0	0	2.24096e+07	0	0	0	0	0	0	0	3.49272e+07	0	1.06266e+08	0	0	0	0	0	0	0	0	4.19937e+07	0	1.30274e+07	0	0	0	2.35326e+07	0	2.7661e+07	9.93408e+06	1.99855e+07	------	------	------	------	------	------	------	------
A0A5C2GJV1	IG c338_heavy_IGHV3-30_IGHD1-14_IGHJ4 (Fragment) OS=Homo sapiens OX=9606 PE=2 SV=1	229	7.8392	0	up	yes	41590000	0	0	2.76735e+07	0	2.73345e+08	0	5.43384e+06	1.2428e+07	0	0	0	1.69496e+07	2.35432e+07	0	5.01979e+07	0	1.98234e+07	0	0	0	3.06507e+06	9.54653e+06	1.41389e+08	2.11822e+07	0	1.29716e+07	0	2.15783e+07	1.25818e+08	0	6.66024e+06	0	5.19263e+07	1.17581e+08	------	------	------	------	------	------	------	------
A0A5C2GK44	IG c128_light_IGLV3-25_IGLJ2 (Fragment) OS=Homo sapiens OX=9606 PE=2 SV=1	229	7.8392	0	up	yes	57460000	0	0	0	0	0	0	0	0	0	2.95299e+06	7.25452e+06	1.28116e+07	0	0	5.80276e+07	0	0	0	0	0	0	1.00962e+07	2.247e+07	4.54117e+08	3.04313e+06	0	0	0	5.03851e+07	3.56855e+06	7.20011e+06	0	3.45654e+07	1.14155e+08	------	------	------	------	------	------	------	------
A0A5C2GK71	IG c846_heavy_IGHV3-33_IGHD3-22_IGHJ4 (Fragment) OS=Homo sapiens OX=9606 PE=2 SV=1	229	7.8392	0	up	yes	19690000	0	0	0	4.58393e+06	0	1.05881e+07	1.41107e+07	0	0	1.12123e+07	0	1.13525e+07	0	6.31934e+06	1.48229e+07	0	0	6.92472e+06	0	0	0	4.61133e+06	5.87308e+07	2.18613e+07	0	0	0	1.29494e+08	0	0	5.34591e+06	0	9.22371e+06	1.16352e+07	------	------	------	------	------	------	------	------
A0A5C2GKC6	IG c262_light_IGKV3-20_IGKJ1 (Fragment) OS=Homo sapiens OX=9606 PE=2 SV=1	229	7.8392	0	up	yes	20680000	0	0	0	0	0	1.63957e+07	0	5.76334e+07	0	0	2.03187e+07	1.05706e+07	0	0	7.32701e+07	1.41324e+07	1.16136e+07	4.65179e+07	0	0	0	6.49884e+07	1.76526e+07	1.31484e+08	6.11138e+06	1.29055e+07	7.37035e+06	0	0	1.79189e+07	1.02186e+07	0	4.6646e+06	3.98528e+07	------	------	------	------	------	------	------	------
A0A5C2GKE9	IGH + IGL c507_light_IGKV1-5_IGKJ1 (Fragment) OS=Homo sapiens OX=9606 PE=2 SV=1	229	7.8392	0	up	yes	111400000	0	0	3.51164e+06	0	0	0	2.70704e+08	3.31164e+07	0	0	0	0	0	2.08781e+08	0	4.47719e+07	0	1.33867e+07	0	0	0	2.52913e+06	1.03795e+07	5.88378e+06	0	1.62703e+07	3.08507e+07	2.06482e+08	7.59622e+08	1.08071e+07	2.92193e+08	0	0	3.76082e+06	------	------	------	------	------	------	------	------
A0A5C2GKG9	IG c571_heavy_IGHV3-53_IGHD7-27_IGHJ4 (Fragment) OS=Homo sapiens OX=9606 PE=2 SV=1	229	7.8392	0	up	yes	25150000	0	2.4205e+08	4.45755e+06	0	4.24904e+07	0	7.48703e+06	0	4.03819e+07	0	0	0	0	6.77329e+06	0	2.16637e+07	0	1.8114e+07	2.6385e+07	0	7.85388e+07	0	5.14604e+07	7.39898e+06	0	0	1.6888e+07	8.76699e+07	0	2.37112e+07	7.78342e+06	0	1.06915e+08	0	------	------	------	------	------	------	------	------
A0A5C2GKI1	IG c443_heavy_IGHV4-39_IGHD3-3_IGHJ3 (Fragment) OS=Homo sapiens OX=9606 PE=2 SV=1	229	7.8392	0	up	yes	15640000	0	8.73163e+07	0	1.67465e+07	9.64309e+07	1.07459e+07	0	0	3.23547e+06	2.23137e+07	2.1719e+06	3.12965e+06	0	0	5.60626e+06	0	0	0	0	0	4.65559e+06	0	2.97274e+07	0	6.43968e+06	4.87598e+07	2.29556e+06	5.42108e+06	0	1.99718e+07	8.54026e+06	6.22042e+06	5.22791e+07	7.99522e+06	------	------	------	------	------	------	------	------
A0A5C2GKJ7	IG c881_light_IGLV2-11_IGLJ3 (Fragment) OS=Homo sapiens OX=9606 PE=2 SV=1	229	7.8392	0	up	yes	51610000	0	0	0	0	0	0	0	0	3.0055e+07	1.20087e+08	0	3.74632e+08	0	0	6.43944e+07	0	0	0	1.62e+07	1.70185e+07	0	4.12234e+07	4.77279e+07	1.3739e+08	4.82756e+06	1.07511e+08	1.25358e+07	8.20327e+06	1.5838e+07	3.00278e+07	2.506e+07	2.59321e+07	1.34485e+08	6.9757e+07	------	------	------	------	------	------	------	------
A0A5C2GKP7	IG c289_light_IGKV3-11_IGKJ4 (Fragment) OS=Homo sapiens OX=9606 PE=2 SV=1	229	7.8392	0	up	yes	21100000	0	0	0	0	0	0	0	1.44435e+07	0	3.42449e+06	2.44145e+06	9.94042e+06	5.76435e+06	5.31171e+07	4.02961e+06	0	0	1.58103e+07	0	0	0	0	8.22928e+06	1.16281e+08	1.81086e+07	1.42502e+07	5.47627e+07	0	0	0	4.15318e+07	0	0	0	------	------	------	------	------	------	------	------
A0A5C2GKP8	IGH + IGL c617_light_IGKV1-33_IGKJ4 (Fragment) OS=Homo sapiens OX=9606 PE=2 SV=1	229	7.8392	0	up	yes	20880000	0	0	3.4526e+06	0	0	0	0	3.97926e+07	1.50472e+07	0	9.19191e+06	4.28848e+08	7.38503e+07	0	3.79124e+07	0	0	0	0	0	0	1.73164e+08	3.4837e+07	8.56931e+07	0	4.69212e+07	0	0	1.30187e+07	5.81879e+06	0	6.55896e+06	3.56888e+07	2.20353e+07	------	------	------	------	------	------	------	------
A0A5C2GKV5	IG c804_light_IGKV1-9_IGKJ5 (Fragment) OS=Homo sapiens OX=9606 PE=2 SV=1	229	7.8392	0	up	yes	20810000	0	0	0	0	3.38599e+08	0	1.59804e+07	2.16601e+07	0	0	1.02329e+08	8.86503e+07	0	4.33223e+06	4.71682e+07	0	3.51641e+07	0	0	5.10477e+06	0	7.44102e+07	3.68215e+07	6.93821e+07	0	2.32578e+07	0	0	7.75184e+07	0	0	0	2.28172e+07	1.98763e+07	------	------	------	------	------	------	------	------
A0A5C2GL38	IG c21_heavy_IGHV4-39_IGHD2-15_IGHJ2 (Fragment) OS=Homo sapiens OX=9606 PE=2 SV=1	229	7.8392	0	up	yes	7274000	0	0	0	0	0	0	3.04826e+06	0	0	0	8.09953e+06	0	0	0	1.21915e+07	0	0	0	0	1.4685e+06	0	0	2.28137e+07	1.19306e+07	0	0	0	1.89898e+06	0	0	4.3586e+06	0	3.15027e+07	1.47803e+07	------	------	------	------	------	------	------	------
A0A5C2GL43	IG c388_heavy_IGHV5-51_IGHD6-19_IGHJ3 (Fragment) OS=Homo sapiens OX=9606 PE=2 SV=1	229	7.8392	0	up	yes	36580000	0	1.6426e+08	7.79775e+07	0	0	0	0	2.02653e+08	0	0	3.74479e+06	0	0	0	3.51213e+07	3.67198e+07	0	9.12809e+07	0	0	3.02717e+07	2.08823e+07	4.21678e+07	0	0	0	3.22243e+07	9.96028e+06	0	0	0	7.07522e+07	2.5401e+08	2.9898e+07	------	------	------	------	------	------	------	------
A0A5C2GL52	IG c1102_light_IGKV1-9_IGKJ3 (Fragment) OS=Homo sapiens OX=9606 PE=2 SV=1	229	7.8392	0	up	yes	13610000	0	0	0	0	0	0	0	0	0	0	0	0	0	0	3.46064e+07	0	0	0	0	0	0	1.76923e+07	4.07989e+07	1.74369e+07	0	0	0	4.18922e+07	3.84369e+07	0	0	1.67187e+07	0	7.98155e+06	------	------	------	------	------	------	------	------
A0A5C2GL66	IG c272_heavy_IGHV3-48_IGHD2-15_IGHJ6 (Fragment) OS=Homo sapiens OX=9606 PE=2 SV=1	229	7.8392	0	up	yes	9567000	0	1.0634e+08	1.07455e+07	0	0	0	1.87611e+07	8.08002e+07	0	0	2.42913e+07	0	0	0	0	0	0	0	1.16006e+07	0	0	8.34841e+06	0	1.64185e+07	0	3.76369e+07	6.60602e+06	7.22763e+06	0	0	4.81099e+06	4.21097e+07	0	0	------	------	------	------	------	------	------	------
A0A5C2GL75	IG c322_light_IGKV3-20_IGKJ1 (Fragment) OS=Homo sapiens OX=9606 PE=2 SV=1	229	7.8392	0	up	yes	20580000	0	0	0	0	0	0	0	0	0	1.11109e+07	0	5.6066e+07	0	7.90992e+06	2.93395e+07	2.56709e+06	1.40039e+07	3.34204e+06	8.04931e+06	0	0	2.05497e+07	0	1.15288e+08	0	3.96854e+07	0	2.52262e+07	0	1.07079e+07	5.49627e+06	0	2.81454e+07	2.24035e+07	------	------	------	------	------	------	------	------
A0A5C2GLB9	IG c824_light_IGLV1-44_IGLJ2 (Fragment) OS=Homo sapiens OX=9606 PE=2 SV=1	229	7.8392	0	up	yes	82780000	0	0	6.62341e+06	0	0	9.02309e+06	0	2.75556e+07	0	2.12631e+07	0	1.21177e+08	0	0	2.61007e+07	0	0	0	0	0	0	9.54315e+07	2.50201e+07	8.16112e+08	0	4.02691e+07	0	0	0	1.3857e+07	0	0	2.21104e+07	7.59536e+07	------	------	------	------	------	------	------	------
A0A5C2GLD5	IG c146_heavy_IGHV3-33_IGHD4-23_IGHJ4 (Fragment) OS=Homo sapiens OX=9606 PE=2 SV=1	229	7.8392	0	up	yes	13470000	0	0	0	1.46395e+07	0	1.14002e+07	2.236e+07	0	1.77851e+07	0	0	0	0	0	6.01686e+06	0	0	3.46298e+07	1.91319e+07	0	0	0	1.9168e+07	0	4.01586e+06	0	0	0	0	7.313e+06	6.27558e+07	5.78643e+07	1.0518e+07	0	------	------	------	------	------	------	------	------
A0A5C2GLF2	IG c563_light_IGLV2-18_IGLJ3 (Fragment) OS=Homo sapiens OX=9606 PE=2 SV=1	229	7.8392	0	up	yes	10990000	0	0	7.24377e+06	0	2.53514e+07	2.79185e+07	0	0	0	6.44943e+06	0	0	0	2.87154e+07	0	0	0	0	0	0	0	1.45941e+07	0	1.698e+07	0	3.8089e+07	1.13284e+07	9.7355e+06	2.04575e+07	0	1.96883e+07	0	0	1.55794e+07	------	------	------	------	------	------	------	------
A0A5C2GLF7	IG c375_heavy_IGHV4-4_IGHD4-17_IGHJ4 (Fragment) OS=Homo sapiens OX=9606 PE=2 SV=1	229	7.8392	0	up	yes	11930000	0	6.29741e+07	0	0	0	0	6.44403e+06	0	9.83274e+06	0	1.52992e+07	0	0	0	5.31376e+07	0	0	0	6.31846e+06	0	9.29861e+06	0	6.28585e+07	0	9.07444e+06	1.0488e+07	2.40689e+07	0	2.34333e+07	4.7134e+06	0	0	8.55638e+06	0	------	------	------	------	------	------	------	------
A0A5C2GLS3	IG c1334_light_IGKV2D-29_IGKJ5 (Fragment) OS=Homo sapiens OX=9606 PE=2 SV=1	229	7.8392	0	up	yes	27470000	0	1.07835e+07	3.0594e+06	0	0	3.35681e+06	0	1.02981e+07	0	0	0	1.02865e+07	0	0	1.9385e+07	0	0	0	9.45279e+06	0	1.45426e+07	4.96585e+07	1.54096e+07	2.2462e+08	1.32566e+07	0	0	1.00805e+07	0	2.6211e+06	2.27272e+07	3.20369e+07	8.91268e+06	0	------	------	------	------	------	------	------	------
A0A5C2GLT0	IG c716_light_IGKV3-20_IGKJ3 (Fragment) OS=Homo sapiens OX=9606 PE=2 SV=1	229	7.8392	0	up	yes	32080000	0	0	0	0	0	0	0	4.63245e+07	0	0	0	0	0	0	7.28173e+06	0	0	1.3887e+07	0	0	0	2.06895e+07	6.4792e+06	2.56045e+07	0	0	0	4.02327e+07	0	0	6.72136e+07	2.39615e+08	0	5.78302e+06	------	------	------	------	------	------	------	------
A0A5C2GLU6	IG c166_light_IGKV4-1_IGKJ2 (Fragment) OS=Homo sapiens OX=9606 PE=2 SV=1	229	7.8392	0	up	yes	70290000	0	0	0	0	0	0	0	0	0	0	0	0	1.27343e+07	0	1.47634e+07	1.83719e+07	0	0	0	5.32853e+06	0	9.42391e+07	1.96245e+07	2.4198e+07	6.59923e+07	6.30657e+08	2.06233e+07	0	6.19666e+07	0	0	2.03734e+07	0	0	------	------	------	------	------	------	------	------
A0A5C2GLV1	IG c326_heavy_IGHV3-30_IGHD3-16_IGHJ3 (Fragment) OS=Homo sapiens OX=9606 PE=2 SV=1	229	7.8392	0	up	yes	7623000	0	0	0	0	0	0	6.40063e+06	0	4.71583e+06	0	0	0	1.63544e+07	0	4.13869e+07	0	0	0	0	0	0	8.14978e+06	2.01709e+07	1.25319e+07	0	5.968e+06	0	0	0	0	2.03331e+07	0	2.49523e+07	7.51705e+06	------	------	------	------	------	------	------	------
A0A5C2GLW6	IG c505_heavy_IGHV4-34_IGHD1-26_IGHJ6 (Fragment) OS=Homo sapiens OX=9606 PE=2 SV=1	229	7.8392	0	up	yes	49080000	0	1.82927e+07	0	0	0	0	9.35797e+06	0	0	2.11534e+07	0	1.97099e+07	0	0	3.83603e+07	0	0	6.23761e+07	0	0	0	0	1.19124e+07	3.22521e+06	0	0	0	0	0	4.05545e+07	2.76274e+07	4.14259e+08	7.74424e+07	1.39365e+07	------	------	------	------	------	------	------	------
A0A5C2GLZ4	IG c147_heavy_IGHV3-30_IGHD7-27_IGHJ4 (Fragment) OS=Homo sapiens OX=9606 PE=2 SV=1	229	7.8392	0	up	yes	21710000	0	0	1.77902e+07	3.032e+06	0	0	2.63629e+07	2.37176e+07	0	6.98187e+06	3.14135e+07	2.75553e+07	0	0	2.33598e+07	0	0	0	0	0	0	4.93145e+07	5.99833e+07	1.26712e+07	0	2.26759e+07	0	0	0	0	7.63838e+06	0	2.78282e+07	1.29748e+08	------	------	------	------	------	------	------	------
A0A5C2GLZ8	IG c513_light_IGLV2-8_IGLJ3 (Fragment) OS=Homo sapiens OX=9606 PE=2 SV=1	229	7.8392	0	up	yes	42720000	0	0	2.12636e+06	0	0	4.61577e+06	3.504e+06	7.36073e+07	0	4.6801e+06	0	0	0	0	0	0	0	0	6.58865e+06	0	0	0	2.55442e+06	2.59942e+07	0	1.03633e+08	0	1.04483e+07	2.65964e+08	0	0	0	0	1.0401e+08	------	------	------	------	------	------	------	------
A0A5C2GM07	IG c1213_light_IGKV2D-28_IGKJ2 (Fragment) OS=Homo sapiens OX=9606 PE=2 SV=1	229	7.8392	0	up	yes	32210000	0	0	0	1.33487e+07	0	0	0	0	0	4.46134e+06	0	9.21338e+06	0	0	3.56087e+07	0	0	0	0	0	7.33968e+06	6.82248e+07	4.95461e+06	2.6968e+08	5.53981e+06	0	0	0	2.2429e+07	0	7.38692e+06	6.08795e+07	2.64161e+06	1.2984e+07	------	------	------	------	------	------	------	------
A0A5C2GM36	IG c345_light_IGLV1-51_IGLJ2 (Fragment) OS=Homo sapiens OX=9606 PE=2 SV=1	229	7.8392	0	up	yes	11390000	0	2.56196e+07	0	0	0	1.58193e+09	0	0	0	2.33809e+08	0	0	0	0	1.36456e+08	0	0	1.90908e+07	0	0	0	8.77031e+06	1.09278e+07	4.16489e+07	0	1.61116e+07	3.02981e+06	0	0	0	0	0	4.52921e+07	1.9647e+07	------	------	------	------	------	------	------	------
A0A5C2GM67	IG c278_heavy_IGHV4-34_IGHD6-13_IGHJ6 (Fragment) OS=Homo sapiens OX=9606 PE=2 SV=1	229	7.8392	0	up	yes	202300000	0	0	0	0	0	9.99077e+06	1.19488e+06	0	0	1.59743e+07	4.92366e+06	0	0	0	1.06699e+07	0	0	0	4.38793e+06	0	0	5.67907e+06	2.40303e+07	7.83595e+06	2.03138e+06	8.99212e+06	0	0	2.18004e+09	1.44324e+08	9.19957e+06	0	2.57231e+07	2.50685e+07	------	------	------	------	------	------	------	------
A0A5C2GMC5	IG c338_heavy_IGHV5-51_IGHD1-26_IGHJ2 (Fragment) OS=Homo sapiens OX=9606 PE=2 SV=1	229	7.8392	0	up	yes	7995000	0	0	6.91607e+06	0	0	0	0	0	0	0	0	0	0	0	4.82674e+06	0	0	0	0	0	0	0	0	2.16992e+07	3.71469e+06	3.17064e+07	7.95179e+06	0	0	0	8.73372e+06	1.76218e+07	0	4.50953e+06	------	------	------	------	------	------	------	------
A0A5C2GMH1	IG c43_heavy_IGHV3-64_IGHD2-21_IGHJ4 (Fragment) OS=Homo sapiens OX=9606 PE=2 SV=1	229	7.8392	0	up	yes	23620000	0	5.11184e+07	0	0	0	0	0	1.36438e+07	4.42465e+07	0	0	2.28235e+07	0	0	9.46281e+06	0	0	0	0	5.05603e+06	0	5.94956e+06	9.11914e+07	1.504e+07	0	3.099e+07	0	1.70204e+07	2.41748e+07	4.23527e+07	0	2.3302e+07	3.08814e+07	8.5008e+06	------	------	------	------	------	------	------	------
A0A5C2GML0	IG c775_heavy_IGHV3-15_IGHD3-10_IGHJ4 (Fragment) OS=Homo sapiens OX=9606 PE=2 SV=1	229	7.8392	0	up	yes	36680000	0	1.23331e+08	5.1754e+06	0	0	0	0	5.43927e+06	9.61071e+06	1.80514e+07	0	1.11712e+08	0	0	8.96832e+06	4.01367e+06	0	0	0	0	0	0	7.88277e+07	5.81111e+07	0	1.01593e+08	8.01541e+06	0	1.29154e+07	1.64358e+07	1.395e+07	0	1.32888e+07	1.36966e+08	------	------	------	------	------	------	------	------
A0A5C2GMT4	IG c755_heavy_IGHV4-39_IGHD1-26_IGHJ5 (Fragment) OS=Homo sapiens OX=9606 PE=2 SV=1	229	7.8392	0	up	yes	50420000	0	1.06441e+07	0	0	0	0	0	4.04407e+07	0	0	0	0	0	0	0	0	0	0	0	0	0	0	1.40957e+07	0	0	0	0	0	1.55802e+07	8.73512e+06	9.7307e+06	5.33353e+08	4.82215e+06	1.86868e+07	------	------	------	------	------	------	------	------
A0A5C2GMW0	IG c973_light_IGKV2-28_IGKJ1 (Fragment) OS=Homo sapiens OX=9606 PE=2 SV=1	229	7.8392	0	up	yes	9725000	0	0	0	4.66735e+06	0	0	0	2.41615e+07	0	0	5.14198e+06	0	3.7414e+07	0	1.15522e+07	9.94489e+06	0	0	6.52323e+06	2.39465e+06	1.34318e+07	0	9.23651e+06	3.61113e+07	1.58914e+07	0	2.6314e+07	1.20228e+07	0	7.62567e+06	9.50389e+06	0	0	0	------	------	------	------	------	------	------	------
A0A5C2GMW5	IG c308_light_IGLV4-69_IGLJ3 (Fragment) OS=Homo sapiens OX=9606 PE=2 SV=1	229	7.8392	0	up	yes	10690000	0	0	0	0	0	2.47539e+06	0	0	0	0	2.43675e+06	1.39353e+07	0	8.31755e+06	0	5.42953e+06	0	4.77608e+06	0	0	0	0	0	6.15676e+06	2.05343e+07	5.59887e+07	0	1.12756e+07	0	1.62873e+07	0	0	1.79836e+07	0	------	------	------	------	------	------	------	------
A0A5C2GN17	IG c835_heavy_IGHV3-23_IGHD3-22_IGHJ6 (Fragment) OS=Homo sapiens OX=9606 PE=2 SV=1	229	7.8392	0	up	yes	44540000	0	0	3.4628e+07	0	0	4.19554e+07	0	0	1.34519e+08	0	0	0	0	0	0	2.40571e+07	0	8.01489e+07	0	0	3.64278e+07	1.66962e+07	9.21252e+07	0	0	2.60101e+08	8.25145e+06	1.30848e+07	0	0	2.06722e+07	0	1.05087e+08	3.51425e+07	------	------	------	------	------	------	------	------
A0A5C2GND5	IG c960_light_IGKV1-5_IGKJ1 (Fragment) OS=Homo sapiens OX=9606 PE=2 SV=1	229	7.8392	0	up	yes	3399000	0	1.66681e+07	0	0	0	0	0	7.38651e+06	0	0	0	0	0	0	4.98151e+06	0	0	0	0	0	0	5.98173e+06	8.62696e+06	2.80966e+06	0	0	2.26214e+06	7.309e+06	1.5919e+07	0	0	0	0	3.86261e+06	------	------	------	------	------	------	------	------
A0A5C2GNF9	IG c90_light_IGKV3-11_IGKJ5 (Fragment) OS=Homo sapiens OX=9606 PE=2 SV=1	229	7.8392	0	up	yes	8438000	0	0	5.83774e+06	0	0	0	4.5355e+06	0	0	7.81936e+06	8.33437e+06	1.2382e+08	1.47765e+07	0	1.1065e+07	0	4.41377e+06	0	0	0	1.11392e+07	4.44646e+07	3.10763e+07	9.02502e+06	0	1.61926e+07	0	1.21467e+07	0	4.35291e+06	1.37407e+07	0	1.03742e+07	4.34485e+06	------	------	------	------	------	------	------	------
A0A5C2GNK5	IG c806_light_IGKV4-1_IGKJ1 (Fragment) OS=Homo sapiens OX=9606 PE=2 SV=1	229	7.8392	0	up	yes	46340000	0	0	1.67354e+07	0	0	0	1.50036e+07	0	3.0669e+07	0	1.03727e+07	1.6971e+07	6.37948e+06	1.03874e+07	4.76918e+07	0	0	0	6.26406e+06	0	0	7.05376e+07	3.79087e+07	3.79008e+08	0	6.00058e+06	0	6.69528e+06	0	1.5033e+07	6.97475e+06	0	3.50702e+07	6.94162e+07	------	------	------	------	------	------	------	------
A0A5C2GNM0	IG c1009_light_IGLV4-69_IGLJ2 (Fragment) OS=Homo sapiens OX=9606 PE=2 SV=1	229	7.8392	0	up	yes	59300000	0	0	0	6.57081e+06	0	1.90094e+08	8.26061e+06	0	0	0	0	3.42227e+06	0	0	1.27094e+07	0	7.32741e+06	5.15334e+06	0	0	0	0	1.25141e+07	9.36146e+06	0	0	0	1.96062e+07	6.28682e+08	0	0	0	2.29554e+07	1.85169e+07	------	------	------	------	------	------	------	------
A0A5C2GNN3	IG c956_heavy_IGHV4-59B_IGHD3-9_IGHJ2 (Fragment) OS=Homo sapiens OX=9606 PE=2 SV=1	229	7.8392	0	up	yes	52510000	0	0	0	0	2.82447e+07	0	1.84291e+07	0	0	1.50575e+08	0	0	0	0	0	1.11727e+09	0	0	0	0	0	2.91473e+07	4.10564e+07	0	7.57011e+07	0	0	0	2.88697e+07	1.84416e+06	0	0	4.72743e+08	9.87538e+06	------	------	------	------	------	------	------	------
A0A5C2GNN6	IG c1025_heavy_IGHV4-59_IGHD3-22_IGHJ3 (Fragment) OS=Homo sapiens OX=9606 PE=2 SV=1	229	7.8392	0	up	yes	10660000	0	2.25883e+07	3.38126e+07	0	0	0	0	0	3.00234e+07	0	0	6.63213e+06	1.94588e+07	0	0	0	9.08052e+06	0	4.67396e+07	0	2.46508e+07	0	1.01037e+07	9.35839e+06	0	5.35833e+06	3.9191e+07	2.33965e+07	0	2.90798e+07	6.7103e+06	0	4.67364e+06	0	------	------	------	------	------	------	------	------
A0A5C2GNU3	IG c227_heavy_IGHV3-53_IGHD3-10_IGHJ4 (Fragment) OS=Homo sapiens OX=9606 PE=2 SV=1	229	7.8392	0	up	yes	24550000	0	0	0	7.60961e+06	1.2658e+07	0	0	3.77182e+07	1.88422e+07	6.05255e+07	0	3.52943e+07	0	0	3.75325e+07	2.91326e+07	0	0	1.16678e+07	0	0	2.58629e+07	1.10516e+08	6.37464e+07	0	0	0	6.07884e+06	3.41433e+07	3.16036e+07	0	0	4.8552e+07	0	------	------	------	------	------	------	------	------
A0A5C2GNX3	IG c523_heavy_IGHV1-18_IGHD6-6_IGHJ4 (Fragment) OS=Homo sapiens OX=9606 PE=2 SV=1	229	7.8392	0	up	yes	5944000	0	0	7.15466e+06	0	1.79019e+08	5.08053e+06	4.96583e+06	0	0	7.63908e+07	7.53759e+06	0	0	0	0	0	0	0	4.03157e+06	0	0	0	2.64889e+07	0	0	0	0	0	0	1.78964e+07	1.04706e+07	7.20141e+06	2.43544e+06	6.83875e+06	------	------	------	------	------	------	------	------
A0A5C2GP37	IG c320_heavy_IGHV5-51_IGHD3-3_IGHJ4 (Fragment) OS=Homo sapiens OX=9606 PE=2 SV=1	229	7.8392	0	up	yes	15070000	0	0	0	8.28058e+06	0	1.94479e+07	0	0	1.21867e+07	1.10387e+07	0	0	2.38474e+07	0	3.17448e+07	0	0	0	0	0	0	1.6068e+07	4.66229e+07	6.61114e+06	0	1.8159e+07	0	0	0	2.66614e+07	1.804e+07	1.69732e+07	4.77129e+07	0	------	------	------	------	------	------	------	------
A0A5C2GP42	IG c297_light_IGLV2-23_IGLJ2 (Fragment) OS=Homo sapiens OX=9606 PE=2 SV=1	229	7.8392	0	up	yes	14820000	0	0	0	0	0	0	0	1.46724e+07	0	1.67204e+07	0	0	4.63099e+06	0	3.02512e+07	0	0	0	0	0	0	0	1.00099e+07	9.94868e+07	9.87374e+06	0	0	0	0	1.06187e+07	0	0	1.07453e+07	3.71633e+07	------	------	------	------	------	------	------	------
A0A5C2GP99	IG c949_light_IGLV2-18_IGLJ2 (Fragment) OS=Homo sapiens OX=9606 PE=2 SV=1	229	7.8392	0	up	yes	27750000	0	0	0	0	1.19463e+07	0	0	0	0	0	4.50805e+06	0	7.89227e+06	3.05667e+06	5.16592e+07	4.35087e+06	0	2.46474e+07	0	0	0	3.89053e+07	0	6.24942e+07	4.12831e+07	5.25734e+07	1.26081e+06	0	1.90107e+07	0	0	0	1.79571e+07	1.38477e+08	------	------	------	------	------	------	------	------
A0A5C2GPB9	IG c1156_light_IGLV6-57_IGLJ2 (Fragment) OS=Homo sapiens OX=9606 PE=2 SV=1	229	7.8392	0	up	yes	7955000	0	1.44039e+07	0	0	0	0	0	0	0	0	0	2.12643e+07	0	0	1.13953e+07	0	0	0	0	0	0	0	1.01103e+07	0	0	1.79966e+07	0	0	1.65729e+07	1.59785e+07	1.16346e+07	0	1.27003e+07	1.04683e+07	------	------	------	------	------	------	------	------
A0A5C2GPF9	IG c1010_heavy_IGHV3-74_IGHD2-21_IGHJ3 (Fragment) OS=Homo sapiens OX=9606 PE=2 SV=1	229	7.8392	0	up	yes	15160000	0	0	1.98665e+07	0	0	0	5.01942e+07	0	9.81893e+06	0	2.9379e+07	0	0	0	1.73387e+07	2.9661e+07	0	0	0	0	1.87464e+07	0	0	1.68432e+07	4.70983e+07	0	0	3.89241e+07	0	2.83727e+07	4.2571e+07	0	8.15297e+06	0	------	------	------	------	------	------	------	------
A0A5C2GPL7	IG c1326_heavy_IGHV3-49_IGHD2-15_IGHJ4 (Fragment) OS=Homo sapiens OX=9606 PE=2 SV=1	229	7.8392	0	up	yes	67330000	0	0	0	0	0	0	0	0	9.79814e+08	1.48944e+08	0	7.81053e+07	4.72113e+08	0	6.2474e+08	0	0	2.07833e+08	0	0	0	4.24884e+07	3.70213e+07	3.55461e+07	0	0	2.09711e+08	0	0	6.36955e+06	0	0	4.58539e+06	5.14686e+08	------	------	------	------	------	------	------	------
A0A5C2GPN4	IG c540_heavy_IGHV3-33_IGHD5-24_IGHJ2 (Fragment) OS=Homo sapiens OX=9606 PE=2 SV=1	229	7.8392	0	up	yes	15550000	0	2.90412e+08	3.16951e+06	0	2.3598e+08	0	0	1.14256e+07	0	1.70228e+07	0	0	2.65348e+07	0	0	0	0	0	0	0	0	5.11184e+06	4.4316e+07	0	0	1.40135e+07	0	5.56775e+06	8.98837e+06	6.06717e+06	0	3.10837e+07	1.69029e+07	5.9682e+07	------	------	------	------	------	------	------	------
A0A5C2GPN9	IG c939_heavy_IGHV4-39_IGHD5-18_IGHJ5 (Fragment) OS=Homo sapiens OX=9606 PE=2 SV=1	229	7.8392	0	up	yes	7817000	0	0	0	0	0	0	0	0	0	3.42916e+06	0	8.25507e+06	0	0	0	0	0	0	0	0	8.26949e+06	0	2.96382e+07	0	0	7.3891e+06	0	7.80288e+06	1.0437e+07	0	0	2.50734e+07	0	1.34646e+07	------	------	------	------	------	------	------	------
A0A5C2GPV7	IG c1426_heavy_IGHV3-48_IGHD3-3_IGHJ4 (Fragment) OS=Homo sapiens OX=9606 PE=2 SV=1	229	7.8392	0	up	yes	8155000	0	1.093e+08	0	0	0	0	0	0	1.06848e+07	0	0	5.30067e+06	0	0	8.00968e+06	0	0	1.57935e+07	0	0	0	6.04569e+06	3.03842e+07	3.78375e+07	0	0	3.24829e+06	0	0	0	4.83018e+06	0	5.0837e+06	1.64788e+07	------	------	------	------	------	------	------	------
A0A5C2GQ08	IG c1422_heavy_IGHV3-30_IGHD1-7_IGHJ6 (Fragment) OS=Homo sapiens OX=9606 PE=2 SV=1	229	7.8392	0	up	yes	24010000	0	0	0	0	0	4.0948e+06	1.87432e+07	6.73502e+07	4.79784e+06	1.41516e+07	0	2.76812e+07	0	8.11691e+06	9.7895e+06	0	0	0	1.40175e+07	0	0	1.36805e+08	1.03812e+08	3.61916e+07	0	1.04916e+07	0	4.60874e+06	2.09223e+07	1.49012e+07	2.34442e+07	0	3.55069e+07	3.82075e+07	------	------	------	------	------	------	------	------
A0A5C2GQA8	IG c976_light_IGKV2D-29_IGKJ1 (Fragment) OS=Homo sapiens OX=9606 PE=2 SV=1	229	7.8392	0	up	yes	15400000	0	0	0	6.92004e+06	0	0	0	0	0	5.01134e+06	0	0	0	9.43252e+06	4.9251e+07	0	0	0	1.47814e+07	0	2.41871e+07	9.85101e+07	0	0	1.32402e+07	7.24583e+07	0	2.03519e+07	0	7.13337e+06	2.17319e+07	0	1.27533e+07	3.71099e+07	------	------	------	------	------	------	------	------
A0A5C2GQE4	IG c100_light_IGKV1D-33_IGKJ2 (Fragment) OS=Homo sapiens OX=9606 PE=2 SV=1	229	7.8392	0	up	yes	21070000	0	0	0	0	0	0	0	0	0	0	0	0	0	2.82689e+06	8.42206e+06	0	0	1.18562e+07	0	0	0	2.33767e+07	3.07944e+07	1.02675e+07	0	0	0	1.6564e+07	5.08597e+07	0	0	1.82095e+07	1.12763e+07	1.14813e+08	------	------	------	------	------	------	------	------
A0A5C2GQP0	IG c1706_heavy_IGHV1-18_IGHD3-16_IGHJ6 (Fragment) OS=Homo sapiens OX=9606 PE=2 SV=1	229	7.8392	0	up	yes	6733000	0	0	0	4.89255e+06	0	0	6.5502e+06	0	0	1.18328e+07	0	0	0	0	2.41489e+06	0	0	2.74146e+07	0	0	0	4.36896e+06	2.92525e+07	2.0252e+07	4.78665e+06	5.71833e+06	0	0	0	0	1.21856e+07	0	0	8.60345e+06	------	------	------	------	------	------	------	------
A0A5C2GR08	IG c970_heavy_IGHV3-48_IGHD3-3_IGHJ6 (Fragment) OS=Homo sapiens OX=9606 PE=2 SV=1	229	7.8392	0	up	yes	10830000	0	1.60169e+07	0	0	0	0	0	6.29795e+06	1.65873e+07	1.55275e+07	5.69055e+06	3.05754e+08	0	0	8.20814e+06	0	0	0	0	0	0	1.58453e+07	6.0079e+07	1.89765e+06	0	1.33392e+07	0	0	0	2.17586e+07	0	0	2.49776e+07	7.88492e+06	------	------	------	------	------	------	------	------
A0A5C2GR61	IG c1832_heavy_IGHV5-51_IGHD2-21_IGHJ4 (Fragment) OS=Homo sapiens OX=9606 PE=2 SV=1	229	7.8392	0	up	yes	35680000	0	0	0	0	0	6.5415e+06	9.89927e+06	1.28842e+07	2.35416e+07	1.87444e+07	8.65286e+06	0	0	4.79209e+06	3.36208e+07	0	0	0	0	0	0	1.5486e+07	8.18834e+07	2.34411e+07	5.2622e+07	1.3336e+07	2.40674e+06	0	6.21174e+07	1.35389e+08	3.28217e+06	0	3.97356e+07	1.39209e+07	------	------	------	------	------	------	------	------
A0A5C2GRB6	IG c429_heavy_IGHV1-46_IGHD4-17_IGHJ1 (Fragment) OS=Homo sapiens OX=9606 PE=2 SV=1	229	7.8392	0	up	yes	9943000	0	0	4.51757e+06	4.63504e+06	0	1.60667e+07	3.56241e+06	0	6.07868e+06	0	0	0	0	0	0	0	0	0	6.71295e+06	0	0	0	4.46509e+07	0	0	1.15265e+07	1.61214e+06	0	2.32846e+07	0	0	3.07816e+07	7.46354e+06	0	------	------	------	------	------	------	------	------
A0A5C2GRB7	IG c5_light_IGKV4-1_IGKJ1 (Fragment) OS=Homo sapiens OX=9606 PE=2 SV=1	229	7.8392	0	up	yes	16870000	0	0	0	4.37358e+06	0	4.85862e+07	6.36187e+06	0	9.17243e+06	0	0	1.78503e+07	4.46961e+07	0	0	0	0	0	5.38242e+07	0	1.02001e+07	2.20131e+07	0	4.22834e+07	2.26926e+07	3.37362e+07	7.74438e+06	0	0	6.85948e+06	0	8.49813e+07	0	4.20256e+06	------	------	------	------	------	------	------	------
A0A5C2GRG4	IG c1483_heavy_IGHV1-46_IGHD6-13_IGHJ4 (Fragment) OS=Homo sapiens OX=9606 PE=2 SV=1	229	7.8392	0	up	yes	28270000	0	0	0	0	2.98393e+07	0	0	0	0	1.39578e+07	2.58659e+07	1.08087e+07	0	0	5.92193e+07	0	7.90834e+06	1.22774e+07	1.22092e+07	0	0	8.33385e+07	1.14902e+08	2.19507e+07	0	0	0	1.08303e+07	4.6314e+07	0	0	7.10769e+07	7.03771e+07	3.82974e+06	------	------	------	------	------	------	------	------
A0A5C2GRK9	IG c95_light_IGLV7-43_IGLJ3 (Fragment) OS=Homo sapiens OX=9606 PE=2 SV=1	229	7.8392	0	up	yes	15950000	0	0	0	0	0	6.14229e+07	2.78068e+07	0	0	3.18198e+06	0	2.80248e+07	2.87705e+06	0	1.65471e+07	0	1.37088e+07	0	8.1148e+07	0	2.00119e+07	2.51848e+07	2.33802e+07	3.6725e+07	0	2.05244e+07	0	1.2854e+07	0	7.94558e+07	0	0	0	1.85082e+07	------	------	------	------	------	------	------	------
A0A5C2GRL5	IG c1354_heavy_IGHV3-48_IGHD1-7_IGHJ4 (Fragment) OS=Homo sapiens OX=9606 PE=2 SV=1	229	7.8392	0	up	yes	11640000	0	4.79519e+08	8.03546e+06	2.74474e+06	1.58581e+07	0	0	9.47757e+06	0	4.26801e+06	1.17006e+07	0	0	0	7.40121e+06	0	0	0	0	2.30083e+06	0	1.31048e+07	4.97715e+07	2.21854e+06	0	7.05704e+06	0	7.15946e+06	4.18177e+07	1.3228e+07	0	0	1.00804e+07	8.36253e+06	------	------	------	------	------	------	------	------
A0A5C2GRW7	IG c225_light_IGLV2-23_IGLJ3 (Fragment) OS=Homo sapiens OX=9606 PE=2 SV=1	229	7.8392	0	up	yes	20320000	0	0	0	0	1.12103e+07	0	0	0	0	0	0	0	0	7.37895e+06	1.31449e+07	3.32873e+06	0	0	0	0	0	7.78583e+06	0	5.53926e+07	0	3.21388e+07	8.6249e+06	1.00317e+08	0	0	1.47917e+07	0	0	3.25364e+07	------	------	------	------	------	------	------	------
A0A5C2GRW8	IG c111_light_IGKV3-11_IGKJ2 (Fragment) OS=Homo sapiens OX=9606 PE=2 SV=1	229	7.8392	0	up	yes	19100000	0	6.38589e+06	0	0	1.48356e+08	0	0	0	5.13473e+06	9.66735e+06	0	3.20221e+07	0	6.50802e+06	3.06439e+07	0	0	0	0	0	0	6.1389e+06	8.8807e+06	1.18186e+08	0	4.65117e+07	0	0	1.01238e+07	0	0	0	3.30069e+07	1.24367e+07	------	------	------	------	------	------	------	------
A0A5C2GRY2	IG c57_light_IGKV3-15_IGKJ2 (Fragment) OS=Homo sapiens OX=9606 PE=2 SV=1	229	7.8392	0	up	yes	34140000	0	3.62142e+08	0	0	3.52152e+07	0	0	4.94913e+07	0	3.13725e+07	0	0	0	0	9.80478e+06	0	0	0	0	0	7.40943e+06	1.02079e+07	0	1.49567e+07	1.13383e+07	1.62379e+07	0	8.49713e+07	2.70363e+08	0	0	0	0	1.18203e+07	------	------	------	------	------	------	------	------
A0A5C2GRZ8	IG c1260_heavy_IGHV2-26_IGHD3-3_IGHJ3 (Fragment) OS=Homo sapiens OX=9606 PE=2 SV=1	229	7.8392	0	up	yes	9785000	0	1.1979e+07	0	2.78631e+06	0	0	0	0	0	0	0	0	0	0	1.05717e+07	0	0	0	0	0	0	0	1.86458e+07	2.6088e+06	7.37963e+06	0	0	0	3.46153e+07	8.38599e+06	0	0	7.74039e+06	3.80436e+07	------	------	------	------	------	------	------	------
A0A5C2GSA9	IG c261_light_IGKV3-20_IGKJ3 (Fragment) OS=Homo sapiens OX=9606 PE=2 SV=1	229	7.8392	0	up	yes	64700000	0	0	0	0	0	4.26887e+08	2.79497e+07	0	0	7.31485e+08	0	3.28855e+06	1.55551e+08	0	0	0	2.23342e+08	0	0	0	0	0	0	0	2.04363e+08	0	1.52155e+07	1.13503e+08	5.24412e+07	3.97391e+07	0	0	3.51102e+08	0	------	------	------	------	------	------	------	------
A0A5C2GSI2	IG c475_light_IGLV1-40_IGLJ3 (Fragment) OS=Homo sapiens OX=9606 PE=2 SV=1	229	7.8392	0	up	yes	48690000	0	0	1.53683e+07	0	4.09516e+07	0	1.56546e+07	0	0	0	3.95631e+06	0	0	0	0	0	0	2.94569e+07	0	0	0	5.1445e+07	0	6.28726e+07	4.93866e+06	0	2.10277e+07	2.11825e+07	0	3.49049e+07	2.01436e+07	4.13584e+08	5.68045e+06	0	------	------	------	------	------	------	------	------
A0A5C2GSP5	IG c354_light_IGLV2-8_IGLJ1 (Fragment) OS=Homo sapiens OX=9606 PE=2 SV=1	229	7.8392	0	up	yes	10700000	0	0	0	0	0	0	0	1.18488e+07	0	7.36076e+06	0	1.00073e+07	0	0	1.48176e+08	0	1.49134e+07	0	0	4.97178e+07	0	7.48936e+06	6.63355e+06	6.95721e+07	0	9.73357e+06	0	0	0	2.1044e+06	0	0	2.45929e+07	1.58196e+07	------	------	------	------	------	------	------	------
A0A5C2GT12	IG c1844_heavy_IGHV3-23_IGHD3-22_IGHJ2 (Fragment) OS=Homo sapiens OX=9606 PE=2 SV=1	229	7.8392	0	up	yes	27720000	0	0	5.74069e+06	3.48815e+06	0	0	0	1.73075e+07	0	3.04551e+07	0	0	0	1.62873e+07	0	0	1.45311e+07	0	1.9343e+07	1.01416e+07	9.47283e+06	2.3563e+07	3.44493e+07	0	1.45174e+07	0	4.50095e+06	0	1.38821e+08	3.44166e+07	0	0	5.6898e+07	4.90031e+07	------	------	------	------	------	------	------	------
A0A5C2GT21	IG c665_light_IGKV1-12_IGKJ5 (Fragment) OS=Homo sapiens OX=9606 PE=2 SV=1	229	7.8392	0	up	yes	90840000	0	0	0	0	5.16833e+07	0	0	2.36704e+08	0	0	0	4.89952e+07	0	0	6.90761e+06	0	0	9.10743e+06	0	0	0	1.64989e+07	7.8812e+06	2.27549e+07	0	1.44083e+08	0	0	1.45048e+08	0	0	7.0816e+08	0	6.21261e+07	------	------	------	------	------	------	------	------
A0A5C2GT23	IG c1239_light_IGLV6-57_IGLJ2 (Fragment) OS=Homo sapiens OX=9606 PE=2 SV=1	229	7.8392	0	up	yes	52310000	0	0	0	0	0	0	0	9.26171e+06	7.38646e+06	1.2693e+07	0	0	0	0	0	0	0	0	0	0	0	0	2.68381e+07	2.70672e+07	9.29764e+06	9.76817e+06	0	0	2.21989e+07	0	0	2.91998e+08	5.39503e+06	2.35123e+08	------	------	------	------	------	------	------	------
A0A5C2GT39	IG c1660_heavy_IGHV4-34_IGHD5-5_IGHJ6 (Fragment) OS=Homo sapiens OX=9606 PE=2 SV=1	229	7.8392	0	up	yes	42750000	0	0	0	0	4.96942e+07	8.15685e+06	0	5.8119e+06	6.94025e+06	0	0	0	7.49885e+06	4.96104e+07	1.2889e+08	7.91028e+07	0	0	1.08678e+07	2.1417e+06	0	0	6.76702e+06	1.34602e+08	4.21682e+06	0	4.6175e+06	0	0	0	1.96178e+08	0	1.66665e+08	0	------	------	------	------	------	------	------	------
A0A5C2GT63	IG c537_light_IGLV1-44_IGLJ3 (Fragment) OS=Homo sapiens OX=9606 PE=2 SV=1	229	7.8392	0	up	yes	18290000	0	0	1.38892e+07	0	0	3.193e+07	1.00721e+07	1.74694e+07	0	0	0	0	8.9919e+06	0	3.24295e+07	0	0	0	0	0	0	2.23121e+07	6.60615e+06	3.93951e+07	0	3.53879e+07	0	7.7443e+06	4.07034e+07	1.51505e+07	0	0	3.95941e+07	3.49249e+07	------	------	------	------	------	------	------	------
A0A5C2GTA5	IG c1069_heavy_IGHV3-7_IGHD1-26_IGHJ4 (Fragment) OS=Homo sapiens OX=9606 PE=2 SV=1	229	7.8392	0	up	yes	21200000	0	1.09517e+07	0	0	1.84507e+07	0	7.98607e+06	0	2.45409e+07	0	0	3.60978e+06	1.53618e+07	0	0	0	0	3.29023e+06	1.58359e+07	0	0	9.45409e+06	0	6.26372e+06	1.77783e+07	3.80744e+07	0	5.02727e+06	9.57104e+07	5.04446e+07	6.57847e+06	0	3.0427e+07	4.1382e+06	------	------	------	------	------	------	------	------
A0A5C2GTC6	IG c1089_heavy_IGHV3-7_IGHD5-24_IGHJ6 (Fragment) OS=Homo sapiens OX=9606 PE=2 SV=1	229	7.8392	0	up	yes	31020000	0	0	1.19387e+07	0	0	0	0	0	0	0	7.52889e+06	0	0	0	0	0	3.24844e+06	0	0	0	1.29899e+07	0	0	7.04876e+07	0	5.86465e+07	4.24094e+06	1.38081e+07	8.66716e+07	0	0	0	0	1.38334e+08	------	------	------	------	------	------	------	------
A0A5C2GTF2	IG c1780_heavy_IGHV4-39_IGHD3-3_IGHJ3 (Fragment) OS=Homo sapiens OX=9606 PE=2 SV=1	229	7.8392	0	up	yes	16820000	0	0	0	0	1.06798e+07	0	0	4.64744e+06	0	1.05194e+07	4.01077e+06	0	0	7.39992e+06	1.56817e+07	0	0	0	0	0	3.49792e+07	7.34303e+06	5.28489e+06	3.49512e+06	0	0	0	2.19493e+07	2.71078e+07	4.46179e+07	3.34743e+07	6.58546e+07	0	0	------	------	------	------	------	------	------	------
A0A5C2GTH5	IG c855_light_IGKV3D-15_IGKJ5 (Fragment) OS=Homo sapiens OX=9606 PE=2 SV=1	229	7.8392	0	up	yes	108200000	0	2.28223e+07	0	0	1.26233e+08	0	0	1.36969e+09	0	0	0	8.58838e+08	6.20455e+07	0	5.49762e+07	7.39306e+06	0	0	1.82527e+07	0	0	3.37498e+07	5.18986e+07	9.38192e+07	0	6.80014e+08	7.49331e+06	1.923e+07	3.35119e+08	0	0	1.01668e+08	0	8.84738e+06	------	------	------	------	------	------	------	------
A0A5C2GTM2	IG c1139_light_IGKV3-20_IGKJ4 (Fragment) OS=Homo sapiens OX=9606 PE=2 SV=1	229	7.8392	0	up	yes	16590000	0	0	0	0	0	0	1.37706e+07	5.44193e+07	0	3.91622e+07	4.37417e+07	1.81617e+07	0	0	5.94812e+07	0	0	1.76584e+08	0	0	0	2.34618e+08	6.35364e+07	9.27245e+07	0	0	5.02808e+06	2.12668e+07	0	7.35822e+06	9.15258e+06	0	0	0	------	------	------	------	------	------	------	------
A0A5C2GTS0	IG c707_light_IGKV3-20_IGKJ4 (Fragment) OS=Homo sapiens OX=9606 PE=2 SV=1	229	7.8392	0	up	yes	37830000	0	0	5.48557e+06	0	0	0	1.20875e+07	0	1.01533e+07	0	0	0	1.50696e+07	0	3.75582e+07	3.87218e+06	0	6.72887e+06	0	0	5.35868e+06	1.14294e+07	0	2.45234e+07	1.43687e+07	3.90248e+07	0	1.64787e+08	2.25083e+07	0	0	0	0	1.88806e+08	------	------	------	------	------	------	------	------
A0A5C2GU14	IG c243_light_IGLV2-14_IGLJ2 (Fragment) OS=Homo sapiens OX=9606 PE=2 SV=1	229	7.8392	0	up	yes	20190000	0	0	0	0	0	0	2.7134e+07	0	5.10315e+07	4.12839e+07	0	0	2.01182e+07	0	6.26342e+07	0	0	1.02989e+07	0	0	0	7.01921e+06	8.62905e+07	4.60101e+07	0	7.09789e+07	0	0	1.03093e+07	8.6801e+06	0	0	0	2.00495e+07	------	------	------	------	------	------	------	------
A0A5C2GU19	IG c1014_light_IGKV3-15_IGKJ1 (Fragment) OS=Homo sapiens OX=9606 PE=2 SV=1	229	7.8392	0	up	yes	18970000	0	0	4.59356e+06	0	4.97013e+07	0	0	0	0	0	0	3.05355e+07	8.25141e+06	2.84253e+06	8.80215e+07	9.75491e+06	0	8.90614e+06	0	0	0	1.34962e+07	0	1.33248e+07	6.54111e+06	1.99283e+07	0	0	8.61969e+07	8.18372e+06	0	0	5.45372e+07	3.89873e+07	------	------	------	------	------	------	------	------
A0A5C2GU34	IG c1015_light_IGLV4-69_IGLJ2 (Fragment) OS=Homo sapiens OX=9606 PE=2 SV=1	229	7.8392	0	up	yes	44250000	0	0	3.38031e+07	0	1.73259e+07	1.70121e+07	0	5.05047e+07	1.3744e+07	0	0	0	0	0	2.56891e+07	0	1.91516e+07	0	2.09867e+07	0	0	4.10362e+07	3.94381e+08	2.03704e+07	0	0	0	2.64662e+07	0	0	0	1.93694e+07	4.23683e+07	2.80241e+07	------	------	------	------	------	------	------	------
A0A5C2GU43	IG c273_light_IGKV4-1_IGKJ1 (Fragment) OS=Homo sapiens OX=9606 PE=2 SV=1	229	7.8392	0	up	yes	29850000	0	2.57625e+08	0	0	0	0	1.5676e+07	1.60544e+07	2.80922e+07	0	0	4.53455e+07	0	0	7.90336e+07	0	1.38909e+07	0	0	1.59707e+07	0	4.85949e+07	5.02903e+07	1.56405e+08	0	5.31804e+07	0	2.1695e+07	0	1.61209e+07	2.15513e+07	0	3.26422e+07	6.31664e+06	------	------	------	------	------	------	------	------
A0A5C2GU59	IG c1054_light_IGKV1-27_IGKJ1 (Fragment) OS=Homo sapiens OX=9606 PE=2 SV=1	229	7.8392	0	up	yes	23460000	0	0	0	0	0	0	1.90455e+07	0	0	4.85059e+08	4.1081e+06	2.04907e+07	0	0	1.44486e+07	4.97582e+06	1.16071e+07	2.37931e+08	0	0	0	2.08543e+07	1.17122e+08	3.25764e+07	5.25599e+06	2.13188e+07	6.6799e+06	0	0	0	0	1.30792e+07	2.20988e+07	6.33471e+07	------	------	------	------	------	------	------	------
A0A5C2GU74	IG c303_light_IGKV2-30_IGKJ4 (Fragment) OS=Homo sapiens OX=9606 PE=2 SV=1	229	7.8392	0	up	yes	25980000	0	0	0	0	0	0	2.43954e+07	5.15588e+07	8.10146e+07	0	3.27902e+07	1.68992e+07	0	0	6.50272e+07	0	3.68173e+07	0	0	0	4.81078e+07	1.05143e+08	3.2834e+07	1.89607e+07	1.69879e+07	6.09882e+07	0	3.13745e+07	0	1.21802e+07	1.82386e+07	7.99343e+07	2.67904e+07	1.34612e+07	------	------	------	------	------	------	------	------
A0A5C2GU97	IG c981_light_IGKV4-1_IGKJ2 (Fragment) OS=Homo sapiens OX=9606 PE=2 SV=1	229	7.8392	0	up	yes	24310000	0	0	0	0	0	0	0	0	0	0	0	0	7.51561e+06	0	1.59575e+06	0	4.93041e+06	1.00424e+08	1.32598e+06	0	0	0	7.53356e+06	3.36485e+07	1.55023e+07	0	1.14073e+07	0	2.02662e+08	6.26933e+06	0	0	3.03533e+06	1.16484e+07	------	------	------	------	------	------	------	------
A0A5C2GUC0	IG c907_light_IGKV3-15_IGKJ3 (Fragment) OS=Homo sapiens OX=9606 PE=2 SV=1	229	7.8392	0	up	yes	15500000	0	1.37959e+08	0	0	1.18536e+07	6.64953e+06	6.19353e+06	8.34448e+07	0	0	0	3.7333e+06	0	1.61724e+07	2.1016e+07	6.40037e+06	1.99671e+07	0	0	0	0	0	4.58033e+07	1.04742e+07	0	7.87058e+07	1.6599e+07	8.47832e+06	0	0	0	6.82762e+06	5.64537e+06	1.352e+07	------	------	------	------	------	------	------	------
A0A5C2GUD9	IG c1125_light_IGKV1D-17_IGKJ1 (Fragment) OS=Homo sapiens OX=9606 PE=2 SV=1	229	7.8392	0	up	yes	37010000	0	0	8.11849e+07	7.75839e+07	3.51087e+07	7.49265e+07	2.3687e+07	0	0	0	0	0	0	2.84098e+07	0	3.15769e+07	0	0	7.83182e+07	4.06793e+07	0	0	7.93269e+06	0	6.92019e+07	0	1.81606e+07	8.51336e+07	2.56056e+07	4.55046e+07	1.76626e+07	1.74867e+08	0	0	------	------	------	------	------	------	------	------
A0A5C2GUF5	IG c393_light_IGKV2D-29_IGKJ1 (Fragment) OS=Homo sapiens OX=9606 PE=2 SV=1	229	7.8392	0	up	yes	29550000	0	0	0	0	0	0	2.74322e+07	1.33166e+08	3.68195e+07	0	0	1.7604e+07	0	0	3.58333e+08	0	3.77058e+07	0	0	0	9.97774e+06	9.38343e+07	8.25949e+07	2.69228e+07	6.33619e+06	1.88095e+07	0	6.7627e+07	1.19723e+07	2.89504e+07	3.06966e+07	0	5.16538e+07	2.89787e+07	------	------	------	------	------	------	------	------
A0A5C2GUG6	IG c1061_light_IGLV1-47_IGLJ3 (Fragment) OS=Homo sapiens OX=9606 PE=2 SV=1	229	7.8392	0	up	yes	43920000	0	0	0	0	2.24424e+07	7.36781e+06	3.67251e+06	0	1.25747e+07	0	0	0	4.41644e+07	8.46487e+06	6.24316e+07	0	0	0	0	1.05199e+06	9.20981e+06	1.45479e+08	9.25828e+07	3.55963e+07	0	2.29685e+08	8.82804e+06	8.17602e+06	0	7.13827e+06	2.08122e+07	0	7.10482e+07	5.31472e+07	------	------	------	------	------	------	------	------
A0A5C2GUH0	IG c967_light_IGLV1-40_IGLJ2 (Fragment) OS=Homo sapiens OX=9606 PE=2 SV=1	229	7.8392	0	up	yes	15150000	0	0	0	0	0	0	0	0	1.57186e+07	2.30404e+07	0	2.12642e+07	0	0	3.69926e+06	0	0	0	0	0	0	0	4.53152e+06	9.90117e+07	0	2.97096e+07	0	0	0	3.20881e+07	0	0	1.17263e+07	4.76619e+06	------	------	------	------	------	------	------	------
A0A5C2GUM9	IG c299_light_IGLV1-51_IGLJ3 (Fragment) OS=Homo sapiens OX=9606 PE=2 SV=1	229	7.8392	0	up	yes	7796000	0	0	3.11033e+06	0	0	0	1.56627e+06	0	2.22354e+07	0	1.22544e+06	3.62258e+06	0	0	6.43528e+07	0	0	1.70687e+07	0	2.32366e+06	0	4.74534e+07	3.02825e+07	1.63491e+07	0	0	3.15318e+06	6.45683e+06	0	0	2.51863e+06	1.27858e+07	1.24833e+07	9.52223e+06	------	------	------	------	------	------	------	------
A0A5C2GUN2	IG c1235_light_IGLV1-40_IGLJ2 (Fragment) OS=Homo sapiens OX=9606 PE=2 SV=1	229	7.8392	0	up	yes	28650000	0	0	0	9.0111e+06	0	0	0	0	0	6.94444e+07	0	6.69271e+06	9.1781e+06	0	3.07663e+07	0	0	0	0	0	0	0	3.28814e+06	0	6.70726e+06	0	3.94081e+06	0	3.392e+07	0	0	2.92856e+08	3.08498e+06	0	------	------	------	------	------	------	------	------
A0A5C2GUN9	IG c1141_light_IGKV1-16_IGKJ4 (Fragment) OS=Homo sapiens OX=9606 PE=2 SV=1	229	7.8392	0	up	yes	45050000	0	0	0	0	1.61168e+09	0	0	7.56225e+06	0	0	2.28918e+07	0	0	1.5377e+07	0	0	0	0	0	0	0	4.61121e+07	2.60453e+07	3.42424e+08	0	1.45026e+08	0	1.15687e+07	0	0	1.02786e+07	0	5.20136e+06	0	------	------	------	------	------	------	------	------
A0A5C2GUP6	IG c493_light_IGLV3-19_IGLJ2 (Fragment) OS=Homo sapiens OX=9606 PE=2 SV=1	229	7.8392	0	up	yes	14460000	0	0	6.5266e+06	0	0	2.93966e+06	5.7373e+06	0	2.18995e+06	0	0	0	0	0	1.7666e+07	0	0	0	0	1.04623e+07	0	0	5.43706e+07	5.30705e+07	3.42426e+06	0	0	0	0	4.03782e+06	0	7.27679e+06	2.96394e+07	2.16596e+07	------	------	------	------	------	------	------	------
A0A5C2GUT4	IG c1191_light_IGKV1-33_IGKJ2 (Fragment) OS=Homo sapiens OX=9606 PE=2 SV=1	229	7.8392	0	up	yes	26260000	0	0	0	0	0	0	0	7.56132e+07	0	0	0	2.50518e+08	0	1.26017e+07	1.32719e+07	0	1.1724e+07	5.13279e+07	1.52027e+07	0	0	5.75185e+08	2.39223e+07	1.74261e+08	0	7.78363e+07	2.99371e+06	6.65013e+06	8.37218e+06	0	0	0	0	2.10782e+07	------	------	------	------	------	------	------	------
A0A5C2GV10	IG c409_light_IGKV3-20_IGKJ1 (Fragment) OS=Homo sapiens OX=9606 PE=2 SV=1	229	7.8392	0	up	yes	60630000	0	0	0	0	0	7.67578e+07	0	1.19402e+08	5.10035e+07	2.04705e+08	0	2.30664e+08	0	0	8.24695e+07	0	0	0	0	0	0	3.50283e+08	1.09427e+08	3.06814e+08	1.46013e+07	5.20565e+07	0	0	3.6648e+07	0	0	0	1.93739e+08	1.4314e+07	------	------	------	------	------	------	------	------
A0A5C2GV78	IG c1391_light_IGLV2-11_IGLJ3 (Fragment) OS=Homo sapiens OX=9606 PE=2 SV=1	229	7.8392	0	up	yes	19510000	0	0	2.25845e+06	0	0	0	0	0	0	1.32896e+07	2.75446e+06	0	0	0	1.53684e+07	0	0	0	0	0	0	0	6.25391e+07	0	0	2.78866e+07	7.38071e+07	3.98432e+07	0	2.5165e+06	8.0919e+06	0	0	1.94559e+07	------	------	------	------	------	------	------	------
A0A5C2GVA0	IG c1247_light_IGKV1D-13_IGKJ4 (Fragment) OS=Homo sapiens OX=9606 PE=2 SV=1	229	7.8392	0	up	yes	9116000	0	0	0	0	0	0	4.34126e+06	5.44411e+06	0	0	0	2.82212e+07	3.349e+06	0	0	0	0	6.51203e+06	0	0	0	0	0	3.10409e+07	0	5.00291e+06	1.54996e+06	0	4.29321e+07	6.85325e+06	0	2.20076e+07	0	0	------	------	------	------	------	------	------	------
A0A5C2GVB5	IG c487_heavy_IGHV3-48_IGHD4-4_IGHJ6 (Fragment) OS=Homo sapiens OX=9606 PE=2 SV=1	229	7.8392	0	up	yes	25430000	0	3.31003e+07	0	0	0	0	0	2.18417e+08	1.0197e+07	1.52518e+07	0	1.71914e+07	2.64083e+06	0	2.20506e+07	0	0	1.8315e+07	0	0	0	0	4.81494e+07	3.96574e+07	0	0	0	5.39389e+06	1.03962e+08	9.09523e+06	0	3.75932e+07	3.75818e+07	2.37738e+07	------	------	------	------	------	------	------	------
A0A5C2GVE2	IG c1534_light_IGKV3-20_IGKJ2 (Fragment) OS=Homo sapiens OX=9606 PE=2 SV=1	229	7.8392	0	up	yes	9952000	0	0	0	0	0	0	0	4.81172e+06	0	0	0	0	0	0	4.98973e+07	0	0	0	0	0	0	7.09966e+07	1.2038e+07	8.69413e+06	0	2.28733e+07	0	0	0	0	2.23161e+07	0	1.76707e+07	3.58345e+07	------	------	------	------	------	------	------	------
A0A5C2GVF1	IG c1297_light_IGKV1-27_IGKJ4 (Fragment) OS=Homo sapiens OX=9606 PE=2 SV=1	229	7.8392	0	up	yes	32770000	0	0	2.02624e+07	7.26438e+06	0	0	0	3.14186e+07	0	0	0	0	0	1.0216e+07	1.04248e+07	1.37096e+07	0	1.24088e+07	0	1.76577e+07	0	4.07859e+07	3.58171e+07	4.15319e+07	0	1.03187e+07	1.32227e+07	8.46809e+06	1.74077e+08	0	0	5.99172e+07	0	4.99135e+07	------	------	------	------	------	------	------	------
A0A5C2GVQ7	IG c1571_heavy_IGHV4-59_IGHD3-10_IGHJ4 (Fragment) OS=Homo sapiens OX=9606 PE=2 SV=1	229	7.8392	0	up	yes	39610000	0	0	1.96882e+07	1.97126e+07	0	0	8.77151e+06	0	1.74784e+07	1.23219e+07	0	0	0	0	4.53116e+07	0	0	0	2.04754e+07	0	0	0	3.55764e+07	9.16412e+07	0	2.93669e+07	0	1.58724e+07	0	2.42104e+07	1.54012e+07	1.49791e+08	0	1.1346e+08	------	------	------	------	------	------	------	------
A0A5C2GVR4	IG c1654_light_IGLV3-25_IGLJ3 (Fragment) OS=Homo sapiens OX=9606 PE=2 SV=1	229	7.8392	0	up	yes	36520000	0	4.05271e+07	0	0	0	0	0	0	0	5.31616e+07	0	2.21813e+07	0	0	5.28841e+07	0	0	0	0	0	0	1.11433e+07	5.60977e+07	1.14491e+07	0	4.64027e+07	0	2.13735e+07	0	0	4.51158e+06	1.3836e+07	1.70567e+07	2.6749e+08	------	------	------	------	------	------	------	------
A0A5C2GVU1	IG c1453_light_IGKV3-11_IGKJ5 (Fragment) OS=Homo sapiens OX=9606 PE=2 SV=1	229	7.8392	0	up	yes	25160000	0	0	2.15467e+07	0	0	1.31122e+07	2.02683e+07	9.90445e+07	0	0	0	3.58341e+07	9.53676e+06	0	1.28387e+07	0	0	0	0	0	0	6.54129e+06	4.57286e+06	7.63172e+07	7.42575e+06	1.45832e+07	6.03669e+06	0	5.29154e+07	6.05109e+06	0	4.22043e+07	1.90153e+07	7.27411e+07	------	------	------	------	------	------	------	------
A0A5C2GW41	IG c807_heavy_IGHV3-13_IGHD5-24_IGHJ6 (Fragment) OS=Homo sapiens OX=9606 PE=2 SV=1	229	7.8392	0	up	yes	38770000	0	0	0	0	0	0	0	0	5.0763e+07	4.60963e+07	1.05895e+07	2.03684e+07	0	0	3.54755e+07	0	1.79429e+07	0	9.69401e+06	0	1.36273e+07	9.20161e+07	5.77722e+07	6.89134e+07	0	5.73385e+07	1.28437e+07	2.5202e+07	2.64798e+07	2.49377e+07	7.26616e+06	3.58135e+07	7.09393e+07	7.77399e+07	------	------	------	------	------	------	------	------
A0A5C2GW48	IG c1497_light_IGKV3-20_IGKJ1 (Fragment) OS=Homo sapiens OX=9606 PE=2 SV=1	229	7.8392	0	up	yes	34760000	0	0	0	0	0	1.22497e+07	4.30087e+06	0	0	0	0	0	1.83218e+07	0	0	0	0	1.34546e+07	0	0	0	8.5656e+07	0	2.78056e+07	1.02217e+07	0	0	0	6.81106e+07	0	5.79601e+07	4.45614e+07	2.0841e+08	0	------	------	------	------	------	------	------	------
A0A5C2GW67	IG c1721_light_IGLV2-14_IGLJ2 (Fragment) OS=Homo sapiens OX=9606 PE=2 SV=1	229	7.8392	0	up	yes	85130000	0	0	0	0	2.53382e+08	6.57584e+08	0	0	0	4.28477e+07	5.17003e+07	0	0	0	1.42817e+07	1.2798e+08	0	6.07563e+07	0	0	2.19489e+07	4.27243e+07	3.73094e+06	6.12441e+07	0	1.1512e+07	1.60447e+07	8.05989e+08	0	1.17651e+07	0	3.97883e+07	0	7.14272e+07	------	------	------	------	------	------	------	------
A0A5C2GW97	IG c1112_light_IGKV1-5_IGKJ1 (Fragment) OS=Homo sapiens OX=9606 PE=2 SV=1	229	7.8392	0	up	yes	21470000	0	0	0	0	0	0	4.46446e+07	0	4.80993e+06	1.78891e+07	1.08478e+07	3.13775e+07	0	0	6.11514e+07	0	0	0	0	0	0	0	2.40798e+07	1.83673e+08	3.47697e+06	0	0	0	0	9.68462e+06	0	7.90332e+06	1.85398e+07	1.03006e+07	------	------	------	------	------	------	------	------
A0A5C2GWJ3	IG c88_light_IGKV3-20_IGKJ5 (Fragment) OS=Homo sapiens OX=9606 PE=2 SV=1	229	7.8392	0	up	yes	94040000	0	1.06242e+08	0	0	1.4071e+07	0	4.07016e+07	0	0	0	0	2.47197e+07	1.53959e+07	0	1.10494e+08	0	0	0	0	2.57541e+07	0	5.86046e+07	0	4.22904e+08	0	1.2838e+08	4.99347e+06	8.14977e+06	5.10126e+08	6.381e+06	1.05234e+07	0	4.08947e+06	3.29402e+07	------	------	------	------	------	------	------	------
A0A5C2GWK0	IG c1891_light_IGKV1-9_IGKJ5 (Fragment) OS=Homo sapiens OX=9606 PE=2 SV=1	229	7.8392	0	up	yes	60020000	0	0	3.49203e+06	0	0	0	4.16186e+06	1.91325e+07	1.48504e+07	1.41191e+07	0	2.68177e+07	0	0	8.48317e+07	0	1.18734e+07	0	0	0	0	4.93738e+07	8.0541e+07	2.29837e+08	5.54595e+06	8.59111e+07	0	6.24596e+07	5.65931e+07	0	1.46169e+07	0	4.11077e+07	1.43685e+08	------	------	------	------	------	------	------	------
A0A5C2GWN8	IG c987_heavy_IGHV4-59B_IGHD3-10_IGHJ6 (Fragment) OS=Homo sapiens OX=9606 PE=2 SV=1	229	7.8392	0	up	yes	17240000	0	2.23094e+07	0	0	0	1.87965e+07	1.09091e+07	0	0	0	0	0	0	0	8.95086e+06	0	0	0	9.10633e+06	0	0	0	2.11405e+07	1.70502e+07	0	1.8935e+07	0	6.13935e+07	0	0	0	0	6.6456e+07	2.19543e+07	------	------	------	------	------	------	------	------
A0A5C2GWX5	IG c1322_light_IGKV3-20_IGKJ2 (Fragment) OS=Homo sapiens OX=9606 PE=2 SV=1	229	7.8392	0	up	yes	24100000	0	0	1.15223e+07	0	0	0	0	0	0	0	6.83048e+06	3.22514e+08	0	0	1.25634e+07	0	1.33229e+07	1.50353e+07	0	0	0	0	7.48913e+06	7.7885e+07	0	0	0	0	1.00627e+07	0	0	1.71946e+08	1.04642e+07	1.13353e+07	------	------	------	------	------	------	------	------
A0A5C2GXK2	IG c368_light_IGKV2-30_IGKJ2 (Fragment) OS=Homo sapiens OX=9606 PE=2 SV=1	229	7.8392	0	up	yes	24000000	0	0	0	0	0	0	0	0	9.38186e+06	2.44438e+07	0	3.35362e+08	0	0	6.89799e+06	8.74008e+06	6.70477e+06	0	0	0	0	9.94328e+06	1.6992e+07	1.76484e+07	7.71325e+06	1.5793e+07	0	1.62746e+07	1.22377e+08	2.08457e+07	0	8.60648e+06	5.63205e+07	5.48942e+06	------	------	------	------	------	------	------	------
A0A5C2GXK9	IG c1693_light_IGLV2-14_IGLJ2 (Fragment) OS=Homo sapiens OX=9606 PE=2 SV=1	229	7.8392	0	up	yes	74310000	0	0	0	0	0	0	2.87996e+06	0	0	0	0	0	2.06582e+07	0	1.94077e+06	0	0	9.73098e+07	0	0	0	0	0	6.24259e+07	0	0	3.57964e+06	1.31575e+07	0	0	4.31397e+07	7.53217e+08	0	1.6211e+07	------	------	------	------	------	------	------	------
A0A5C2GXT4	IG c520_light_IGKV3-11_IGKJ1 (Fragment) OS=Homo sapiens OX=9606 PE=2 SV=1	229	7.8392	0	up	yes	80680000	0	0	8.42543e+06	0	0	0	0	0	0	0	7.86884e+07	1.16108e+07	0	3.20018e+07	0	0	0	0	1.33482e+07	0	8.32852e+06	0	0	4.25359e+08	0	2.18483e+08	4.16546e+06	1.52384e+07	0	0	0	1.75625e+08	4.20342e+06	1.25061e+08	------	------	------	------	------	------	------	------
A0A5C2GXV2	IG c540_light_IGKV1-5_IGKJ2 (Fragment) OS=Homo sapiens OX=9606 PE=2 SV=1	229	7.8392	0	up	yes	184600000	0	0	0	0	1.02749e+08	1.24809e+07	0	6.64116e+07	0	0	2.8194e+06	0	0	0	2.39627e+07	0	2.32564e+07	1.25084e+08	0	0	0	0	3.24254e+07	1.81527e+08	0	0	0	6.52945e+07	7.33888e+08	9.54844e+06	2.48625e+07	1.14152e+09	7.24567e+06	1.83741e+07	------	------	------	------	------	------	------	------
A0A5C2GY39	IG c1299_light_IGKV4-1_IGKJ1 (Fragment) OS=Homo sapiens OX=9606 PE=2 SV=1	229	7.8392	0	up	yes	31820000	0	0	1.34863e+07	1.29328e+07	0	7.3278e+06	5.27261e+07	9.65557e+07	4.21342e+07	0	1.57042e+07	0	0	0	1.21994e+08	0	0	0	0	3.73784e+06	0	1.18016e+08	7.89314e+07	1.21901e+08	0	4.93456e+07	0	2.05696e+07	1.1441e+07	1.5883e+07	2.28595e+07	0	2.79535e+07	3.29879e+07	------	------	------	------	------	------	------	------
A0A5C2GY47	IG c1537_heavy_IGHV3-48_IGHD1-26_IGHJ4 (Fragment) OS=Homo sapiens OX=9606 PE=2 SV=1	229	7.8392	0	up	yes	415900000	0	0	3.83392e+06	0	1.5808e+07	0	4.46398e+06	1.59093e+07	8.39935e+06	0	0	0	0	0	0	7.7865e+06	0	1.0768e+08	1.40296e+07	0	3.57976e+07	0	0	0	6.70195e+06	0	1.99751e+06	1.12909e+07	4.68532e+09	7.00131e+06	0	2.42727e+08	2.94978e+07	6.2083e+06	------	------	------	------	------	------	------	------
A0A5C2GY85	IG c680_light_IGLV1-40_IGLJ3 (Fragment) OS=Homo sapiens OX=9606 PE=2 SV=1	229	7.8392	0	up	yes	4572000	0	0	3.36737e+06	0	0	0	0	8.56875e+06	0	0	0	9.3226e+06	0	0	0	0	0	7.41889e+06	0	7.8742e+06	0	4.66658e+07	0	4.47767e+06	0	5.31628e+06	0	1.22179e+07	1.65076e+07	0	5.15187e+06	0	1.11868e+07	0	------	------	------	------	------	------	------	------
A0A5C2GYC3	IG c1742_light_IGKV1-5_IGKJ2 (Fragment) OS=Homo sapiens OX=9606 PE=2 SV=1	229	7.8392	0	up	yes	155700000	0	3.59783e+07	0	0	0	0	0	3.31264e+07	0	3.17418e+06	0	8.55264e+06	5.76924e+06	0	1.22503e+07	0	3.16469e+06	0	0	0	0	1.6348e+07	2.76238e+07	1.11613e+08	0	2.61936e+07	0	1220480653	1.33491e+08	1.61639e+08	1.82553e+07	0	1.43794e+08	2.50997e+07	------	------	------	------	------	------	------	------
A0A5C2GYC4	IG c1913_light_IGLV2-14_IGLJ2 (Fragment) OS=Homo sapiens OX=9606 PE=2 SV=1	229	7.8392	0	up	yes	31700000	0	0	1.3975e+07	9.57576e+06	8.09021e+07	0	0	9.40975e+06	1.75157e+07	2.33084e+07	0	1.32173e+08	0	0	0	0	5.73707e+06	0	0	0	0	3.22608e+07	1.45154e+07	1.71254e+08	8.58119e+06	0	0	0	2.69412e+07	9.68134e+06	0	0	0	1.4938e+08	------	------	------	------	------	------	------	------
A0A5C2GYF3	IG c750_light_IGKV3-20_IGKJ1 (Fragment) OS=Homo sapiens OX=9606 PE=2 SV=1	229	7.8392	0	up	yes	28790000	0	0	0	0	0	4.39833e+06	2.39681e+06	2.98642e+07	0	0	5.83282e+06	5.1306e+07	0	5.30892e+07	1.494e+08	0	9.4183e+06	0	0	3.61121e+06	0	2.87399e+07	1.51106e+07	8.90811e+07	0	0	0	0	0	0	1.53087e+07	1.83845e+08	1.25815e+07	2.95491e+07	------	------	------	------	------	------	------	------
A0A5C2GYK2	IG c1707_heavy_IGHV3-15_IGHD1-7_IGHJ5 (Fragment) OS=Homo sapiens OX=9606 PE=2 SV=1	229	7.8392	0	up	yes	10670000	0	0	0	0	0	0	0	0	0	7.54265e+06	0	0	0	0	3.3002e+07	0	0	0	0	0	0	0	4.88924e+07	5.40564e+06	0	0	0	4.57039e+06	0	1.5366e+07	2.21867e+06	0	2.33481e+07	2.81832e+07	------	------	------	------	------	------	------	------
A0A5C2GYX5	IG c858_light_IGKV1-12_IGKJ4 (Fragment) OS=Homo sapiens OX=9606 PE=2 SV=1	229	7.8392	0	up	yes	48620000	0	7.3045e+08	0	4.51629e+06	6.86499e+08	0	1.24559e+07	3.56913e+08	0	0	0	0	8.52264e+07	0	6.61174e+06	0	0	0	0	4.51984e+06	0	0	1.80244e+07	0	0	1.67019e+08	1.8377e+07	7.99813e+06	3.57425e+08	4.24395e+06	7.74333e+06	0	0	2.66631e+06	------	------	------	------	------	------	------	------
A0A5C2GZ84	IG c1679_light_IGLV2-11_IGLJ2 (Fragment) OS=Homo sapiens OX=9606 PE=2 SV=1	229	7.8392	0	up	yes	20100000	0	0	0	0	0	1.81788e+07	0	0	0	4.26928e+07	0	0	0	0	8.07378e+07	3.01741e+06	2.12592e+07	0	0	0	0	0	3.43643e+07	1.17445e+08	1.96791e+07	3.37376e+07	0	1.36376e+07	0	0	0	0	0	2.23133e+07	------	------	------	------	------	------	------	------
A0A5C2GZN9	IG c1260_light_IGKV1-9_IGKJ1 (Fragment) OS=Homo sapiens OX=9606 PE=2 SV=1	229	7.8392	0	up	yes	4223000	0	5.72535e+07	0	0	0	0	0	0	0	0	0	3.38943e+06	0	0	1.2899e+07	0	0	0	0	0	0	8.6418e+06	3.55405e+06	4.51856e+06	0	2.33257e+07	0	7.66998e+06	0	0	9.14222e+06	0	0	2.45951e+06	------	------	------	------	------	------	------	------
A0A5C2GZS4	IG c1188_light_IGKV3-20_IGKJ2 (Fragment) OS=Homo sapiens OX=9606 PE=2 SV=1	229	7.8392	0	up	yes	60570000	0	0	0	0	1.27872e+07	0	0	7.36071e+06	0	0	0	1.12201e+08	0	8.8791e+06	0	0	0	4.64237e+07	8.49235e+06	0	9.61862e+06	0	7.37338e+06	9.4501e+06	5.4708e+06	1.1277e+07	3.56813e+06	0	4.54684e+08	2.33322e+07	6.22881e+06	0	7.36779e+06	1.98078e+08	------	------	------	------	------	------	------	------
[truncated: 555 more rows]
[truncated: 8 more columns]
